# Supplementary material for: Trophoblast cell differentiation in the bovine placenta: differentially expressed genes between uninucleate trophoblast cells and trophoblast giant cells are involved in the composition and remodeling of the extracellular matrix and O-glycan biosynthesis
Source: BMC Mol Cell Biol. 2020 Jan 17;21:1. doi: 10.1186/s12860-020-0246-8 (PMC6969411; doi:10.1186/s12860-020-0246-8)
Supplement: Supplementary file 1 — Additional file 1: Table S1-A. List of differentially expressed genes (DEGs) between UTCs and TGCs obtained by analyzing microarray data with the BRB Array Tools. Table S1-B. Correlation between the microarray and quantitative reverse transcription PCR measurements. Table S1-C. List of DAVID IDs generated from the BRB list of DEGs (Table S1-A) using the DAVID Gene List Manager. Table S1-D. KEGG pathways that are involved in the differentiation of UTCs into TGCs and associated DEGs. Table S1-E. Annotation clusters of GO terms related to UTC differentiation into TGCs and associated DEGs (enrichment score > 2). Table S1-F. Sequences of primers used for PCR and quantitative reverse transcription PCR. [file 12860_2020_246_MOESM1_ESM.xlsx]

## Sheet: A - BRB list of DEGs
Table S1-A: List of all identified DEGs using BRB
UniqueID	Parametric p-value	FDR	Geometric mean of intensities (class TGC /class UTC )	Symbol	UGCluster
12852652	2.28e-05	0.0181	6.81
12890691	0.001589	0.0288	5.9	DNAI1	ENSBTAT00000011254 // DNAI1 // dynein, axonemal, intermediate chain 1 // --- // 524709
12743274	0.0025387	0.0357	5.3	HCAR3	XM_002701703 // HCAR3 // hydroxycarboxylic acid receptor 3 // --- // 527744 /// ENSBTAT
12894406	0.0001361	0.0181	5.23	ADAMTSL1	XM_609099 // ADAMTSL1 // ADAMTS-like 1 // --- // 530624 /// XM_002689568 // ADAMTSL1 //
12698464	0.009756	0.0687	5.18	QPCT	ENSBTAT00000018493 // QPCT // glutaminyl-peptide cyclotransferase // --- // 281437 ///
12914663	2.13e-05	0.0181	4.99
12805840	0.005106	0.0498	4.87
12909180	0.0037069	0.0424	4.84	TLR8	NM_001033937 // TLR8 // toll-like receptor 8 // --- // 532262 /// GU936182 // TLR8 // t
12869630	0.0010156	0.0249	4.82	MIR218-1	NR_031146 // MIR218-1 // microRNA mir-218-1 // --- // 100313258
12687091	0.0048532	0.0486	4.39	KCNE2	NM_001077084 // KCNE2 // potassium voltage-gated channel, Isk-related family, member 2
12890007	0.0002094	0.0186	4.35	FSD1L	NM_001192260 // FSD1L // fibronectin type III and SPRY domain containing 1-like // ---
12748035	2.54e-05	0.0181	4.29	DAO	NM_001206225 // DAO // D-amino-acid oxidase // --- // 615334 /// ENSBTAT00000025068 //
12719085	0.0012513	0.0267	4.25	ITIH2	NM_001098016 // ITIH2 // inter-alpha-trypsin inhibitor heavy chain 2 // --- // 512164 /
12895296	0.0001824	0.0184	4.21	FAM219A	ENSBTAT00000011253 // FAM219A // family with sequence similarity 219, member A // --- /
12798047	0.0001506	0.0181	4.19	SLC6A6	NM_174610 // SLC6A6 // solute carrier family 6 (neurotransmitter transporter, taurine),
12804741	0.000122	0.0181	4.18	PRP4	NM_212448 // PRP4 // prolactin-related protein 13 // --- // 406200 /// ENSBTAT000000093
12787841	0.0004966	0.0201	4.18	GZMK	NM_001205959 // GZMK // granzyme K (granzyme 3; tryptase II) // --- // 528871 /// ENSBT
12831796	5.84e-05	0.0181	4.14
12807051	0.0044794	0.0466	4.13	LOC782894	ENSBTAT00000029986 // LOC782894 // serpin peptidase inhibitor, clade B (ovalbumin), mem
12786143	0.0035039	0.0414	4.08	FYB	NM_001105414 // FYB // FYN binding protein // --- // 535347 /// ENSBTAT00000001953 // F
12832832	2.2e-06	0.0181	3.99	PAG14	XM_002706487 // PAG14 // pregnancy-associated glycoprotein 14 // --- // 337908 /// ENSB
12871689	0.0047256	0.0478	3.95	SLIT2	NM_001191516 // SLIT2 // slit homolog 2 (Drosophila) // --- // 534164 /// ENSBTAT000000
12862249	0.0051678	0.0501	3.94	BHLHE41	NM_001076297 // BHLHE41 // basic helix-loop-helix family, member e41 // --- // 613907 /
12743757	0.002703	0.0365	3.9	INPP4B	XM_003583286 // INPP4B // inositol polyphosphate-4-phosphatase, type II, 105kDa // ---
12789156	0.0089054	0.0655	3.9	SERPINA5	ENSBTAT00000005307 // SERPINA5 // serpin peptidase inhibitor, clade A (alpha-1 antiprot
12835111	3.97e-05	0.0181	3.88	SHANK2	XM_002684570 // SHANK2 // SH3 and multiple ankyrin repeat domains 2 // --- // 618649 //
12903280	0.0024247	0.0348	3.86	XPNPEP2	NM_001205555 // XPNPEP2 // X-prolyl aminopeptidase (aminopeptidase P) 2, membrane-bound
12760207	5.5e-06	0.0181	3.85	LOC100125412	NM_001105031 // LOC100125412 // differential display clone 8 // --- // 100125412
12854718	0.0057466	0.0524	3.83	PON1	NM_001046269 // PON1 // paraoxonase 1 // --- // 523798 /// ENSBTAT00000020790 // PON1 /
12858517	9.98e-05	0.0181	3.82	ARHGAP9	XM_002687563 // ARHGAP9 // Rho GTPase activating protein 9 // --- // 507960 /// ENSBTAT
12879363	0.0042588	0.0456	3.81	CYFIP2	NM_001205850 // CYFIP2 // cytoplasmic FMR1 interacting protein 2 // --- // 518833 /// E
12721672	0.0021441	0.0329	3.76	ST3GAL1	NM_001097983 // ST3GAL1 // ST3 beta-galactoside alpha-2,3-sialyltransferase 1 // --- //
12756732	4.4e-06	0.0181	3.75	WDR87	XM_002695035 // WDR87 // WD repeat domain 87 // --- // 509804 /// ENSBTAT00000054630 //
12774050	0.0002279	0.0186	3.75	LOC100335809	XM_002685236 // LOC100335809 // protease-like // --- // 100335809
12873186	0.0016998	0.0298	3.71	HPSE	ENSBTAT00000007550 // HPSE // heparanase // --- // 281230 /// NM_174082 // HPSE // hepa
12706341	8.9e-06	0.0181	3.69	KCNG3	XM_002691247 // KCNG3 // potassium voltage-gated channel, subfamily G, member 3 // ---
12845835	6.02e-05	0.0181	3.67	CREB3L4	XM_002685996 // CREB3L4 // cAMP responsive element binding protein 3-like 4 // --- // 5
12832674	0.0002714	0.0189	3.64	PAG1	NM_174411 // PAG1 // pregnancy-associated glycoprotein 1 // --- // 281964 /// ENSBTAT00
12825041	0.0027298	0.0366	3.64	DKK4	XM_586277 // DKK4 // dickkopf homolog 4 (Xenopus laevis) // --- // 509338 /// ENSBTAT00
12832843	1.78e-05	0.0181	3.63	PAG15	NM_176624 // PAG15 // pregnancy-associated glycoprotein 15 // --- // 337909 /// ENSBTAT
12693575	0.0004288	0.0197	3.62	RPGRIP1	ENSBTAT00000054087 // RPGRIP1 // retinitis pigmentosa GTPase regulator interacting prot
12780150	0.011693	0.0758	3.62	ALPL	NM_176858 // ALPL // alkaline phosphatase, liver/bone/kidney // --- // 280994 /// ENSBT
12832740	0.0002257	0.0186	3.59	PAG3	NM_001304568 // PAG3 // pregnancy-associated glycoprotein 3
12821682	0.0021159	0.0326	3.59	TLL2	XM_864694 // TLL2 // tolloid-like 2 // --- // 504975 /// ENSBTAT00000015593 // TLL2 //
12902795	0.004497	0.0466	3.59	F9	NM_001103220 // F9 // coagulation factor IX // Xq32-q33 // 280688 /// ENSBTAT0000005363
12873497	0.0001424	0.0181	3.58	ENPEP	NM_001038027 // ENPEP // glutamyl aminopeptidase (aminopeptidase A) // --- // 504350 //
12721562	0.0002937	0.019	3.57	MIR2489	NR_031041 // MIR2489 // microRNA mir-2489 // --- // 100313407
12782544	9.07e-05	0.0181	3.55	ARHGEF10L	NM_001046297 // ARHGEF10L // Rho guanine nucleotide exchange factor (GEF) 10-like // --
12833917	1.85e-05	0.0181	3.52	MGC157408	NM_001105381 // MGC157408 // pregnancy-associated glycoprotein // --- // 517463 /// ENS
12860640	0.0001469	0.0181	3.51	CHST11	NM_001192668 // CHST11 // carbohydrate (chondroitin 4) sulfotransferase 11 // --- // 52
12731563	0.000545	0.0206	3.51	NUCB2	NM_001075381 // NUCB2 // nucleobindin 2 // --- // 509003 /// ENSBTAT00000023221 // NUCB
12839535	0.0037138	0.0425	3.51	CREG1	NM_001075942 // CREG1 // cellular repressor of E1A-stimulated genes 1 // --- // 530908
12902874	0.000177	0.0181	3.49	XIAP	NM_001205592 // XIAP // X-linked inhibitor of apoptosis // --- // 281647 /// ENSBTAT000
12689874	0.0084901	0.0638	3.49	BCL2L10	XM_002690964 // BCL2L10 // BCL2-like 10 (apoptosis facilitator) // --- // 523056 /// EN
12854454	4.95e-05	0.0181	3.48	RAPGEF5	XM_597790 // RAPGEF5 // Rap guanine nucleotide exchange factor (GEF) 5 // --- // 519566
12914207	0.0008435	0.0234	3.47
12849229	0.0186347	0.0981	3.46	HGF	NM_001031751 // HGF // hepatocyte growth factor (hepapoietin A; scatter factor) // ---
12679105	9.8e-06	0.0181	3.45	CLCN2	NM_001102487 // CLCN2 // chloride channel 2 // --- // 505569 /// ENSBTAT00000016291 //
12822410	5.2e-06	0.0181	3.42	PKD2L1	XM_002698489 // PKD2L1 // polycystic kidney disease 2-like 1 // --- // 521231 /// ENSBT
12848835	0.0042028	0.0452	3.39	IL6	NM_173923 // IL6 // interleukin 6 (interferon, beta 2) // --- // 280826 /// ENSBTAT0000
12678555	0.0005473	0.0206	3.38	CASR	ENSBTAT00000005042 // CASR // calcium-sensing receptor // --- // 281038 /// NM_174002 /
12832893	0.0001574	0.0181	3.37	PAG20	NM_176629 // PAG20 // pregnancy-associated glycoprotein 20 // --- // 337914 /// ENSBTAT
12754435	0.0017194	0.0299	3.37	FTSJD1	XM_001250104 // FTSJD1 // FtsJ methyltransferase domain containing 1 // --- // 781914 /
12895113	5.48e-05	0.0181	3.33	C8H9orf24	NM_001076240 // C8H9orf24 // chromosome 8 open reading frame, human C9orf24 // --- // 5
12728524	0.001864	0.0309	3.33	PDGFD	NM_001083706 // PDGFD // platelet derived growth factor D // --- // 525931 /// ENSBTAT0
12804490	5.36e-05	0.0181	3.32	PRP3	ENSBTAT00000065601 // PRP3 // prolactin-related protein 3 // --- // 281430
12875937	0.000739	0.0222	3.32
12765959	0.0098533	0.0691	3.29	HOXB8	XM_001788233 // HOXB8 // homeobox B8 // --- // 785855
12809501	4.76e-05	0.0181	3.27	CABYR	NM_001038067 // CABYR // calcium binding tyrosine-(Y)-phosphorylation regulated // ---
12799767	0.0005835	0.0207	3.27	IL17RB	NM_001083467 // IL17RB // interleukin 17 receptor B // --- // 533605 /// ENSBTAT0000001
12730711	0.0001504	0.0181	3.26	ADM	NM_173888 // ADM // adrenomedullin // --- // 280713 /// ENSBTAT00000028036 // ADM // ad
12814185	0.0011338	0.0257	3.26	SCNN1G	NM_001193174 // SCNN1G // sodium channel, nonvoltage-gated 1, gamma // --- // 617802 //
12804563	0.0015216	0.0285	3.26	PRP14	NM_001097562 // PRP14 // prolactin-related protein 14 // --- // 282007 /// ENSBTAT00000
12915249	0.0037585	0.0427	3.26
12821704	0.0015027	0.0285	3.25	ANKRD22	NM_001081579 // ANKRD22 // ankyrin repeat domain 22 // --- // 504991 /// ENSBTAT0000001
12824487	0.0004517	0.0198	3.24	GPR124	ENSBTAT00000011608 // GPR124 // G protein-coupled receptor 124 // --- // ---
12829642	0.000651	0.0215	3.22	ST3GAL4	NM_205806 // ST3GAL4 // ST3 beta-galactoside alpha-2,3-sialyltransferase 4 // --- // 40
12765776	0.0028134	0.0372	3.21
12876857	0.0005818	0.0207	3.2	COMP	NM_001166517 // COMP // cartilage oligomeric matrix protein // --- // 281088 /// ENSBTA
12792769	0.0001029	0.0181	3.19	C21H14orf49	NM_001205869 // C21H14orf49 // chromosome 21 open reading frame, human C14orf49 // ---
12703774	0.0053073	0.0507	3.19	AK1	NM_001013582 // AK1 // adenylate kinase 1 // --- // 280715 /// ENSBTAT00000054038 // AK
12863513	0.0006231	0.0211	3.16	LOC100294723	XM_002687837 // LOC100294723 // Killer cell lectin-like receptor subfamily B member 1B
12864859	0.0022822	0.034	3.15	METTL7B	XM_002684154 // METTL7B // methyltransferase like 7B // --- // 506952 /// ENSBTAT000000
12804243	0.0008251	0.0232	3.13	LOC100298767	XM_002697542 // LOC100298767 // placental prolactin-related protein 1-like // --- // 10
12771070	0.0048975	0.0487	3.13	CARD14	NM_001205901 // CARD14 // caspase recruitment domain family, member 14 // --- // 523360
12717421	0.0106646	0.0722	3.13	PI3	NM_001080353 // PI3 // peptidase inhibitor 3, skin-derived (SKALP) // --- // 783871 ///
12867595	0.0015334	0.0286	3.12	NTN4	NM_001102203 // NTN4 // netrin 4 // --- // 537455 /// ENSBTAT00000004136 // NTN4 // net
12691574	0.0018762	0.031	3.12	THSD4	NM_001078030 // THSD4 // thrombospondin, type I, domain containing 4 // --- // 540939 /
12730190	0.0122232	0.0775	3.12	NXPE2	XM_002692997 // NXPE2 // neurexophilin and PC-esterase domain family, member 2 // --- /
12744008	5.27e-05	0.0181	3.11	HCAR1	NM_001145234 // HCAR1 // hydroxycarboxylic acid receptor 1 // --- // 538759 /// ENSBTAT
12705866	8.7e-06	0.0181	3.1	VAV2	ENSBTAT00000005932 // VAV2 // vav 2 guanine nucleotide exchange factor // --- // --- //
12684354	0.0034683	0.0411	3.1	TMPRSS2	NM_001081585 // TMPRSS2 // transmembrane protease, serine 2 // --- // 511037 /// ENSBTA
12865769	0.0061958	0.0541	3.1	NCKAP1L	NM_001143876 // NCKAP1L // NCK-associated protein 1-like // --- // 513641 /// ENSBTAT00
12832903	0.0014757	0.0283	3.08	PAG21	NM_176630 // PAG21 // pregnancy-associated glycoprotein 21 // --- // 337915 /// ENSBTAT
12883794	1.66e-05	0.0181	3.06	IL17B	NM_001192045 // IL17B // interleukin 17B // --- // 504992 /// ENSBTAT00000013986 // IL1
12747893	0.0014835	0.0283	3.06	HHIP	NM_001099114 // HHIP // hedgehog interacting protein // --- // 540830 /// ENSBTAT000000
12733029	2.49e-05	0.0181	3.04	DSCAML1	XM_002693002 // DSCAML1 // Down syndrome cell adhesion molecule like 1 // --- // 538739
12720619	0.0029632	0.0381	3.04	TRIB3	NM_001076103 // TRIB3 // tribbles homolog 3 (Drosophila) // --- // 538465 /// ENSBTAT00
12804415	0.0041216	0.0448	3.04	PRL	NM_173953 // PRL // prolactin // --- // 280901 /// ENSBTAT00000020313 // PRL // prolact
12843460	6.24e-05	0.0181	3.03	TSPAN1	NM_001034270 // TSPAN1 // tetraspanin 1 // --- // 506550 /// ENSBTAT00000017715 // TSPA
12843976	0.0006535	0.0215	3.02	CD101	NM_001205659 // CD101 // CD101 molecule // --- // 509609 /// ENSBTAT00000024229 // CD10
12914113	0.0127989	0.0798	3.02
12806949	0.000468	0.0198	3.01
12829563	0.000112	0.0181	2.99	PAG10	NM_176621 // PAG10 // pregnancy-associated glycoprotein 10 // --- // 337904 /// ENSBTAT
12895327	0.0016246	0.0292	2.99	AQP7	NM_001076378 // AQP7 // aquaporin 7 // --- // 615498 /// ENSBTAT00000026782 // AQP7 //
12694561	0.0077143	0.0608	2.99	SIX1	BC123733 // SIX1 // SIX homeobox 1 // --- // 511371 /// ENSBTAT00000016104 // SIX1 // S
12828604	0.0020602	0.0321	2.97	SIPA1L2	NM_001206220 // SIPA1L2 // signal-induced proliferation-associated 1 like 2 // --- // 5
12703250	0.0003462	0.0196	2.96
12818985	0.0005661	0.0206	2.96	ENTPD1	ENSBTAT00000047864 // ENTPD1 // ectonucleoside triphosphate diphosphohydrolase 1 // ---
12860032	4.24e-05	0.0181	2.95	MGAT3	XM_598319 // MGAT3 // mannosyl (beta-1,4-)-glycoprotein beta-1,4-N-acetylglucosaminyltr
12904372	0.0096135	0.0681	2.95	AWAT2	XM_599558 // AWAT2 // acyl-CoA wax alcohol acyltransferase 2 // --- // 521298 /// ENSBT
12845168	0.0038292	0.0431	2.94	LOC520463	ENSBTAT00000004012 // LOC520463 // sugar transporter SWEET1-like // --- // 520463
12827782	0.0055843	0.0518	2.94	SLC25A16	NM_174672 // SLC25A16 // solute carrier family 25 (mitochondrial carrier; Graves diseas
12675059	0.0009055	0.024	2.93
12796483	0.0005294	0.0205	2.91	VIPR1	NM_001081607 // VIPR1 // vasoactive intestinal peptide receptor 1 // --- // 535858 ///
12727180	0.0102619	0.0706	2.91	BBOX1	NM_001101881 // BBOX1 // butyrobetaine (gamma), 2-oxoglutarate dioxygenase (gamma-butyr
12896979	6.57e-05	0.0181	2.9	MICAL1	NM_001081582 // MICAL1 // microtubule associated monoxygenase, calponin and LIM domain
12820061	6.77e-05	0.0181	2.9	SEMA4G	NM_001101117 // SEMA4G // sema domain, immunoglobulin domain (Ig), transmembrane domain
12806644	0.0018219	0.0306	2.9	PRP8	AB196438 // PRP8 // prolactin-related protein VIII // --- // 613971 /// ENSBTAT00000015
12804086	0.0014165	0.028	2.88	LOC100126544	NM_001110447 // LOC100126544 // uncharacterized LOC100126544 // --- // 100126544 /// EN
12853586	0.0149945	0.0874	2.87	PRSS58	NM_001040509 // PRSS58 // protease, serine, 58 // --- // 506919 /// ENSBTAT00000004732
12814059	0.0001054	0.0181	2.86	C25H16orf59	NM_001205379 // C25H16orf59 // chromosome 25 open reading frame, human C16orf59 // ---
12773711	0.0001736	0.0181	2.86	ARHGAP27	NM_001102352 // ARHGAP27 // Rho GTPase activating protein 27 // --- // 789296 /// ENSBT
12817842	0.0007244	0.0221	2.86	FAM20C	XM_614520 // FAM20C // family with sequence similarity 20, member C // --- // 534672 //
12847260	0.0056452	0.0521	2.86	PDCD1	NM_001083506 // PDCD1 // programmed cell death 1 // --- // 613842 /// ENSBTAT0000001533
12741290	1.27e-05	0.0181	2.85	CAPN8	ENSBTAT00000016982 // CAPN8 // calpain 8 // --- // 617138 /// NM_001081619 // CAPN8 //
12769835	0.000131	0.0181	2.84	ATP2A3	NM_001114154 // ATP2A3 // ATPase, Ca++ transporting, ubiquitous // --- // 512313 /// EN
12796976	0.0001779	0.0181	2.84	SLC6A11	NM_001206903 // SLC6A11 // solute carrier family 6 (neurotransmitter transporter, GABA)
12806828	0.0348443	0.139	2.82	MCCD1	XM_002697348 // MCCD1 // mitochondrial coiled-coil domain 1 // --- // 617505 /// ENSBTA
12848395	0.000174	0.0181	2.81	MIR30E	NR_031356 // MIR30E // microRNA mir-30e // --- // 791017
12734523	0.0022645	0.0339	2.81	RGS7	NM_174169 // RGS7 // regulator of G-protein signaling 7 // --- // 281452 /// ENSBTAT000
12888848	0.0001643	0.0181	2.8	MIR2466	NR_031006 // MIR2466 // microRNA mir-2466 // --- // 100313235
12754748	0.0003984	0.0197	2.8	PLEKHG4	ENSBTAT00000028741 // PLEKHG4 // pleckstrin homology domain containing, family G (with
12699381	0.0019493	0.0315	2.8	MGC152281	NM_001101891 // MGC152281 // uncharacterized LOC507942 // --- // 507942 /// ENSBTAT0000
12847392	0.003168	0.0394	2.8	C3H1orf54	BC118464 // C3H1orf54 // chromosome 3 open reading frame, human C1orf54 // --- // 61480
12723435	0.0053887	0.0511	2.8	TMEM65	NM_001076318 // TMEM65 // transmembrane protein 65 // --- // 614243 /// ENSBTAT00000029
12834866	0.0215941	0.106	2.8	GAS2	NM_001105001 // GAS2 // growth arrest-specific 2 // --- // 614840 /// ENSBTAT0000002885
12709172	1.13e-05	0.0181	2.79	MCF2L	BC148999 // MCF2L // MCF.2 cell line derived transforming sequence-like // --- // 50559
12733127	0.0010169	0.0249	2.79	FCHSD2	XM_002693439 // FCHSD2 // FCH and double SH3 domains 2 // --- // 539601 /// ENSBTAT0000
12914459	0.0057819	0.0526	2.79
12676663	0.0018861	0.031	2.78
12805318	0.0148238	0.0869	2.77	CYP39A1	NM_001098938 // CYP39A1 // cytochrome P450, family 39, subfamily A, polypeptide 1 // --
12849944	3.05e-05	0.0181	2.76	CPA5	NM_001077905 // CPA5 // carboxypeptidase A5 // --- // 511416 /// ENSBTAT00000017924 //
12892827	0.0018359	0.0307	2.76	STC1	NM_176669 // STC1 // stanniocalcin 1 // --- // 338078 /// ENSBTAT00000002200 // STC1 //
12911411	0.0069453	0.0577	2.76
12744791	0.0299766	0.128	2.76	LOC783956	ENSBTAT00000048193 // LOC783956 // bcl-2-like protein 10 pseudogene // --- // 783956
12833011	1.53e-05	0.0181	2.75	LOC504812	XM_871641 // LOC504812 // pregnancy-associated glycoprotein 1-like // --- // 504812 ///
12911487	5.12e-05	0.0181	2.75
12777652	7.4e-05	0.0181	2.74	SGOL2	NM_001191290 // SGOL2 // shugoshin-like 2 (S. pombe) // --- // 532412 /// ENSBTAT000000
12741558	0.0017424	0.0301	2.74	GLT25D2	NM_001191302 // GLT25D2 // glycosyltransferase 25 domain containing 2 // --- // 789150
12836428	0.002715	0.0365	2.73	DENND2D	NM_001075168 // DENND2D // DENN/MADD domain containing 2D // --- // 504595 /// ENSBTAT0
12853903	0.0075255	0.0601	2.73	CDK6	NM_001192301 // CDK6 // cyclin-dependent kinase 6 // --- // 511754 /// ENSBTAT000000613
12713920	0.0005678	0.0206	2.72	DNMT3B	ENSBTAT00000005094 // DNMT3B // DNA (cytosine-5-)-methyltransferase 3 beta // --- // 35
12786039	0.0002369	0.0186	2.71	LOC533085	XM_002696267 // LOC533085 // rAN binding protein 17-like // --- // 533085 /// XM_003583
12785002	0.0002762	0.0189	2.71	LOC100337114	ENSBTAT00000034533 // LOC100337114 // rAN binding protein 17-like // --- // 100337114 /
12755157	3.75e-05	0.0181	2.7
12732120	0.0018818	0.031	2.7	PGM2L1	NM_001098984 // PGM2L1 // phosphoglucomutase 2-like 1 // --- // 515366 /// ENSBTAT00000
12841430	0.0036635	0.0422	2.7	PPAP2B	NM_001076473 // PPAP2B // phosphatidic acid phosphatase type 2B // --- // 617707 /// EN
12811770	2.89e-05	0.0181	2.68	CCNF	NM_001098870 // CCNF // cyclin F // --- // 505200 /// ENSBTAT00000034643 // CCNF // cyc
12841743	0.0016119	0.029	2.68	TGFBR3	XM_001253071 // TGFBR3 // transforming growth factor, beta receptor III // --- // 78489
12915433	2.06e-05	0.0181	2.67
12835200	0.0002709	0.0189	2.67	LOC619012	XR_139709 // LOC619012 // pregnancy-associated glycoprotein 1-like // --- // 619012
12911901	4.66e-05	0.0181	2.66
12732807	0.0002039	0.0186	2.66	MICAL2	XM_613663 // MICAL2 // microtubule associated monoxygenase, calponin and LIM domain con
12807029	0.0008569	0.0234	2.66	KCNK5	NM_001191144 // KCNK5 // potassium channel, subfamily K, member 5 // --- // 782166 ///
12821626	0.0328795	0.134	2.66	DKK1	NM_001205544 // DKK1 // dickkopf homolog 1 (Xenopus laevis) // --- // 504445 /// JN9667
12698714	9.36e-05	0.0181	2.65	SLC1A4	NM_001081577 // SLC1A4 // solute carrier family 1 (glutamate/neutral amino acid transpo
12800901	0.0001102	0.0181	2.64	C23H6orf141	NM_001145653 // C23H6orf141 // chromosome 23 open reading frame, human C6orf141 // ---
12779492	2.68e-05	0.0181	2.62	PADI2	NM_001105452 // PADI2 // peptidyl arginine deiminase, type II // --- // 617851 /// ENSB
12736359	0.0012873	0.0271	2.6	RABGAP1L	ENSBTAT00000019777 // RABGAP1L // RAB GTPase activating protein 1-like // --- // 527428
12675349	0.0020945	0.0324	2.58
12809424	0.0105156	0.0717	2.58	MAPRE2	NM_001034374 // MAPRE2 // microtubule-associated protein, RP/EB family, member 2 // ---
12900524	0.0007727	0.0225	2.57	SLC22A2	XM_599284 // SLC22A2 // solute carrier family 22 (organic cation transporter), member 2
12736935	0.0072598	0.0589	2.57	PAPPA2	XM_002694100 // PAPPA2 // pappalysin 2 // --- // 538320 /// ENSBTAT00000024358 // PAPPA
12827996	0.0089406	0.0656	2.57	ANK3	NM_001105620 // ANK3 // ankyrin 3, node of Ranvier (ankyrin G) // --- // 511203 /// BC1
12827823	2.92e-05	0.0181	2.56	NDST2	NM_174777 // NDST2 // N-deacetylase/N-sulfotransferase (heparan glucosaminyl) 2 // ---
12853004	0.0002212	0.0186	2.56	RELN	NM_001206458 // RELN // reelin // --- // 281450 /// BC142438 // RELN // reelin // --- /
12914235	0.0004019	0.0197	2.56
12808205	0.0033131	0.0404	2.56	TUBB6	NM_001046373 // TUBB6 // tubulin, beta 6 class V // --- // 534206 /// BC113260 // TUBB6
12768988	0.0041047	0.0447	2.55	LIMD2	NM_001040512 // LIMD2 // LIM domain containing 2 // --- // 508942 /// ENSBTAT0000001071
12831629	0.0345315	0.138	2.55	FANCF	NM_001105425 // FANCF // Fanconi anemia, complementation group F // --- // 539681 /// E
12881902	0.0013924	0.0279	2.54	C7H19orf59	XM_869357 // C7H19orf59 // chromosome 7 open reading frame, human C19orf59 // --- // 61
12762897	0.0075864	0.0603	2.54	GLP2R	XM_589370 // GLP2R // glucagon-like peptide 2 receptor // --- // 511942 /// ENSBTAT0000
12851621	0.004152	0.0449	2.53	FAM71F1	NM_001046457 // FAM71F1 // family with sequence similarity 71, member F1 // --- // 5394
12830997	8.76e-05	0.0181	2.51	TBC1D10C	NM_001102060 // TBC1D10C // TBC1 domain family, member 10C // --- // 520599 /// ENSBTAT
12702089	0.0002771	0.0189	2.51	GAPVD1	NM_001102520 // GAPVD1 // GTPase activating protein and VPS9 domains 1 // --- // 539646
12763791	0.018443	0.0976	2.51	PHOSPHO1	NM_001193119 // PHOSPHO1 // phosphatase, orphan 1 // --- // 524639 /// ENSBTAT000000000
12810056	2.61e-05	0.0181	2.5	CIDEA	ENSBTAT00000064010 // CIDEA // cell death-inducing DFFA-like effector a // --- // 52705
12757474	0.0050863	0.0497	2.5	DBNDD1	NM_001099005 // DBNDD1 // dysbindin (dystrobrevin binding protein 1) domain containing
12786137	0.0071141	0.0583	2.5	CCL28	ENSBTAT00000002036 // CCL28 // chemokine (C-C motif) ligand 28 // --- // 535328 /// NM_
12848796	0.0107129	0.0723	2.5
12835468	8.87e-05	0.0181	2.49
12690792	0.0214582	0.106	2.49	GNB5	NM_001099070 // GNB5 // guanine nucleotide binding protein (G protein), beta 5 // --- /
12747110	0.0001187	0.0181	2.48
12778650	0.0014967	0.0284	2.48	FIGN	ENSBTAT00000011468 // FIGN // fidgetin // --- // 540478
12681831	0.0015411	0.0286	2.48	BCL6	NM_001206450 // BCL6 // B-cell CLL/lymphoma 6 // --- // 539020 /// ENSBTAT00000001978 /
12828783	0.0057955	0.0527	2.48	RHOBTB1	NM_001082453 // RHOBTB1 // Rho-related BTB domain containing 1 // --- // 540513 /// ENS
12804726	0.0072993	0.0591	2.48	PRP6	NM_205778 // PRP6 // prolactin-related protein VI // --- // 404081 /// BC149578 // PRP6
12675065	0.007419	0.0596	2.48
12741876	0.0137234	0.083	2.48
12720214	0.000766	0.0224	2.47	NFATC2	ENSBTAT00000024318 // NFATC2 // nuclear factor of activated T-cells, cytoplasmic, calci
12848001	0.0010792	0.0253	2.47	LOC782689	XM_003585887 // LOC782689 // alpha-N-acetylgalactosaminide alpha-2,6-sialyltransferase
12897811	0.0012481	0.0267	2.47	FAM135A	XM_002705105 // FAM135A // family with sequence similarity 135, member A // --- // 5320
12914339	0.0001598	0.0181	2.46
12914045	0.0010706	0.0253	2.46
12844067	0.037105	0.143	2.46	LOC510369	XM_002686441 // LOC510369 // hypoxanthine phosphoribosyltransferase 1-like // --- // 51
12797309	0.0411341	0.152	2.46	C22H3orf24	BC109838 // C22H3orf24 // chromosome 22 open reading frame, human C3orf24 // --- // 768
12759165	2.33e-05	0.0181	2.45	LGALS4	ENSBTAT00000021701 // LGALS4 // lectin, galactoside-binding, soluble, 4 // --- // 61480
12712804	7.39e-05	0.0181	2.45	IL17D	XM_866648 // IL17D // interleukin 17D // --- // 614982 /// ENSBTAT00000035680 // IL17D
12756438	0.0002593	0.0189	2.45	GFOD2	NM_001014863 // GFOD2 // glucose-fructose oxidoreductase domain containing 2 // --- //
12768625	0.0009975	0.0249	2.45	B4GALNT2	EF445547 // B4GALNT2 // beta-1,4-N-acetyl-galactosaminyl transferase 2 // --- // 508108
12773920	0.0015285	0.0286	2.45	ASAP3	ENSBTAT00000016266 // ASAP3 // ArfGAP with SH3 domain, ankyrin repeat and PH domain 3 /
12703239	0.0016865	0.0297	2.45	MBOAT2	ENSBTAT00000010729 // MBOAT2 // membrane bound O-acyltransferase domain containing 2 //
12777493	0.0021293	0.0327	2.45	EPB41L5	NM_001035384 // EPB41L5 // erythrocyte membrane protein band 4.1 like 5 // --- // 53094
12804519	0.0097243	0.0686	2.45	CLIC5	ENSBTAT00000013537 // CLIC5 // chloride intracellular channel 5 // --- // 281696 /// NM
12764181	0.0003972	0.0197	2.44	SPOP	NM_001075936 // SPOP // speckle-type POZ protein // --- // 530618 /// ENSBTAT0000000766
12912283	0.0008246	0.0232	2.44
12784107	0.0111106	0.0736	2.44	KCTD18	NM_001046514 // KCTD18 // potassium channel tetramerisation domain containing 18 // ---
12800371	8.85e-05	0.0181	2.43	TMEM42	NM_001076298 // TMEM42 // transmembrane protein 42 // --- // 613945 /// ENSBTAT00000022
12806109	0.0036823	0.0423	2.43	CYP39A1	NM_001098938 // CYP39A1 // cytochrome P450, family 39, subfamily A, polypeptide 1 // --
12892532	0.0050308	0.0494	2.43	ADAMTSL1	XM_609099 // ADAMTSL1 // ADAMTS-like 1 // --- // 530624 /// ENSBTAT00000061071 // LOC10
12861727	0.0040703	0.0445	2.42	WNT10B	ENSBTAT00000020402 // WNT10B // wingless-type MMTV integration site family, member 10B
12876635	0.0234188	0.111	2.42	LOC100337122	ENSBTAT00000015934 // LOC100337122 // caudal type homeobox 1-like // --- // 100337122 /
12728328	3.38e-05	0.0181	2.41	TRIM66	ENSBTAT00000027831 // TRIM66 // tripartite motif containing 66 // --- // ---
12818575	0.0002863	0.019	2.41	LOC783396	XM_002698174 // LOC783396 // forkhead box L1-like // --- // 783396
12677255	0.0009804	0.0247	2.41
12782693	0.0012856	0.0271	2.41	GRHL3	ENSBTAT00000026370 // GRHL3 // grainyhead-like 3 (Drosophila) // --- // 531906
12675069	0.0018811	0.031	2.41
12832775	0.0025658	0.0358	2.41	PAG5	NM_176616 // PAG5 // pregnancy-associated glycoprotein 5 // --- // 337899 /// AF020507
12831879	0.0036563	0.0422	2.41	SLC36A4	XM_002698995 // SLC36A4 // solute carrier family 36 (proton/amino acid symporter), memb
12734920	0.0273012	0.121	2.41	FMO2	NM_001163274 // FMO2 // flavin containing monooxygenase 2 (non-functional) // --- // 50
12712068	0.0002282	0.0186	2.4	CCNA1	XM_002691801 // CCNA1 // cyclin A1 // --- // 521939 /// ENSBTAT00000009579 // CCNA1 //
12682707	0.0036014	0.0419	2.4
12693826	0.0058788	0.0529	2.4	DMGDH	NM_001205545 // DMGDH // dimethylglycine dehydrogenase // --- // 504453 /// ENSBTAT0000
12782838	0.0001722	0.0181	2.39	FAM126B	XM_612699 // FAM126B // family with sequence similarity 126, member B // --- // 533324
12746898	0.0015546	0.0286	2.39	INTU	NM_001205855 // INTU // inturned planar cell polarity effector homolog (Drosophila) //
12889215	0.0073606	0.0594	2.39	GULO	NM_001034043 // GULO // L-gulono-gamma-lactone oxidase // --- // 286812 /// BC102936 //
12838617	0.0078591	0.0613	2.39	CYP4A22	NM_001098990 // CYP4A22 // cytochrome P450, family 4, subfamily A, polypeptide 22 // --
12911623	3.27e-05	0.0181	2.38
12802355	0.0004227	0.0197	2.38	SLC44A4	NM_001083442 // SLC44A4 // solute carrier family 44, member 4 // --- // 520625 /// ENSB
12719694	0.0006746	0.0216	2.38	GPCPD1	XM_002692364 // GPCPD1 // glycerophosphocholine phosphodiesterase GDE1 homolog (S. cere
12892571	0.0010575	0.0252	2.38	TEK	NM_173964 // TEK // TEK tyrosine kinase, endothelial // --- // 280939 /// ENSBTAT000000
12690214	0.0037834	0.0428	2.38	DAPK2	XM_002690876 // DAPK2 // death-associated protein kinase 2 // --- // 529131 /// ENSBTAT
12765308	0.0104114	0.0712	2.38	HEXIM2	NM_001193043 // HEXIM2 // hexamethylene bis-acetamide inducible 2 // --- // 614679 ///
12762566	0.0005276	0.0205	2.37	DHRS11	NM_001035088 // DHRS11 // dehydrogenase/reductase (SDR family) member 11 // --- // 5102
12725842	0.001833	0.0307	2.37	OXR1	NM_001076148 // OXR1 // oxidation resistance 1 // --- // 539092 /// ENSBTAT00000053824
12810182	3.71e-05	0.0181	2.36	TTC39C	ENSBTAT00000007408 // TTC39C // tetratricopeptide repeat protein 39C-like // --- // 532
12915287	0.000125	0.0181	2.36
12848404	0.0001434	0.0181	2.36	HILPDA	NM_001105498 // HILPDA // hypoxia inducible lipid droplet-associated // --- // 10012592
12678189	0.0001436	0.0181	2.36	MCF2L2	XM_002684886 // MCF2L2 // MCF.2 cell line derived transforming sequence-like 2 // --- /
12857986	0.0002794	0.0189	2.36	FKBP11	NM_001045932 // FKBP11 // FK506 binding protein 11, 19 kDa // --- // 506043 /// ENSBTAT
12889361	0.0003393	0.0196	2.36	DOCK5	XM_002689790 // DOCK5 // dedicator of cytokinesis 5 // --- // 505572 /// ENSBTAT0000002
12702232	0.0003743	0.0197	2.36	EML4	NM_001193054 // EML4 // echinoderm microtubule associated protein like 4 // --- // 5401
12827476	0.0110006	0.0732	2.36	MIR1296	NR_031015 // MIR1296 // microRNA mir-1296 // --- // 100313106
12865056	0.0005543	0.0206	2.35	SLC35E3	NM_001083654 // SLC35E3 // solute carrier family 35, member E3 // --- // 509009 /// BC1
12700860	0.0036701	0.0423	2.35	PREB	NM_001076875 // PREB // prolactin regulatory element binding // --- // 525256 /// ENSBT
12763990	0.0052452	0.0504	2.35	CRLF3	NM_001192650 // CRLF3 // cytokine receptor-like factor 3 // --- // 528033 /// ENSBTAT00
12766839	0.012271	0.0777	2.35	LOC100336469	XM_002696110 // LOC100336469 // secreted and transmembrane protein 1A-like // --- // 10
12883021	0.0006702	0.0216	2.34	PRELID2	BC149453 // PRELID2 // PRELI domain containing 2 // --- // 524741 /// ENSBTAT0000006098
12676531	0.0020309	0.0319	2.34
12782928	0.0020345	0.0319	2.34	RCC1	NM_001105408 // RCC1 // regulator of chromosome condensation 1 // --- // 534142 /// ENS
12903830	0.0023648	0.0344	2.34	KIAA2022	ENSBTAT00000000375 // KIAA2022 // KIAA2022 ortholog // --- // 512493
12723202	0.0003866	0.0197	2.33	TSNARE1	NM_001082446 // TSNARE1 // t-SNARE domain containing 1 // --- // 535306 /// ENSBTAT0000
12793853	0.0011254	0.0257	2.33	RALGAPA1	BC123775 // RALGAPA1 // Ral GTPase activating protein, alpha subunit 1 (catalytic) // -
12719311	0.0064585	0.0554	2.33	NDRG3	NM_001101996 // NDRG3 // NDRG family member 3 // --- // 514399 /// ENSBTAT00000026141 /
12675319	0.0081635	0.0626	2.33
12720518	0.0252722	0.116	2.33	FAM107B	BC112821 // FAM107B // family with sequence similarity 107, member B // --- // 535023 /
12855643	0.0411265	0.151	2.33	NAPEPLD	ENSBTAT00000018833 // NAPEPLD // N-acyl phosphatidylethanolamine phospholipase D // ---
12866444	5.08e-05	0.0181	2.32	ESYT1	NM_001077943 // ESYT1 // extended synaptotagmin-like protein 1 // --- // 520669 /// ENS
12809817	0.0004411	0.0198	2.32	SPIRE1	ENSBTAT00000031033 // SPIRE1 // spire homolog 1 (Drosophila) // --- // 519030
12675367	0.0065864	0.0561	2.32
12887590	6.87e-05	0.0181	2.31	COL23A1	ENSBTAT00000017548 // COL23A1 // collagen, type XXIII, alpha 1 // --- // ---
12869844	0.0001682	0.0181	2.31	KIT	NM_001166484 // KIT // v-kit Hardy-Zuckerman 4 feline sarcoma viral oncogene homolog //
12735089	0.0007294	0.0221	2.31	GPR52	ENSBTAT00000055657 // GPR52 // G protein-coupled receptor 52 // --- // 506159 /// NM_00
12911795	0.0019737	0.0316	2.31
12874334	0.0006219	0.0211	2.3	COX18	NM_001082437 // COX18 // COX18 cytochrome c oxidase assembly homolog (S. cerevisiae) //
12768579	0.005872	0.0529	2.3	TMEM92	NM_001083651 // TMEM92 // transmembrane protein 92 // --- // 507710 /// ENSBTAT00000007
12685923	0.0217482	0.107	2.3	SCHIP1	NM_001046412 // SCHIP1 // schwannomin interacting protein 1 // --- // 535716 /// ENSBTA
12734563	0.0056915	0.0522	2.29	CAPN2	NM_001103086 // CAPN2 // calpain 2, (m/II) large subunit // --- // 281662 /// ENSBTAT00
12876092	0.0141794	0.0845	2.29
12868924	3.94e-05	0.0181	2.28	CSNK1E	ENSBTAT00000026623 // CSNK1E // casein kinase 1, epsilon // --- // 768234
12913371	0.0001249	0.0181	2.28
12718625	0.0001291	0.0181	2.28	RALGAPA2	BC114017 // RALGAPA2 // Ral GTPase activating protein, alpha subunit 2 (catalytic) // -
12907734	0.0001421	0.0181	2.28	STS	NM_001075394 // STS // steroid sulfatase (microsomal), isozyme S // --- // 509206 /// E
12854330	0.0003509	0.0196	2.28	MEOX2	NM_001098045 // MEOX2 // mesenchyme homeobox 2 // --- // 518540 /// BC140506 // MEOX2 /
12755491	0.0010884	0.0254	2.28	LOC100336354	XM_002694921 // LOC100336354 // ribosomal protein L22-like 1-like // --- // 100336354
12803643	0.0002674	0.0189	2.27	C23H6orf47	NM_001101267 // C23H6orf47 // chromosome 23 open reading frame, human C6orf47 // --- //
12798781	0.0003605	0.0197	2.27	ARL6IP5	NM_001014891 // ARL6IP5 // ADP-ribosylation-like factor 6 interacting protein 5 // ---
12675355	0.0005394	0.0206	2.27
12748384	0.0005462	0.0206	2.27	FAM109A	ENSBTAT00000002742 // FAM109A // family with sequence similarity 109, member A // --- /
12740309	0.0005776	0.0207	2.27	TMEM63A	NM_001102162 // TMEM63A // transmembrane protein 63A // --- // 534017 /// ENSBTAT000000
12857841	0.00093	0.0242	2.27	AMDHD1	NM_001098872 // AMDHD1 // amidohydrolase domain containing 1 // --- // 505315 /// ENSBT
12678377	0.0028451	0.0374	2.27	MIR2284I	NR_031140 // MIR2284I // microRNA mir-2284i // --- // 100313114
12792547	0.0004252	0.0197	2.26	CCDC88C	NM_001102017 // CCDC88C // coiled-coil domain containing 88C // --- // 515039 /// ENSBT
12675091	0.0009465	0.0245	2.26
12675061	0.0030648	0.0389	2.26
12825729	0.0078056	0.0612	2.26
12872493	0.0142229	0.0846	2.26	EMCN	ENSBTAT00000048484 // EMCN // endomucin // --- // 616367 /// NM_001076420 // EMCN // en
12853779	7.84e-05	0.0181	2.25	HIPK2	NM_001101922 // HIPK2 // homeodomain interacting protein kinase 2 // --- // 510158 ///
12699996	0.0004189	0.0197	2.25	CHCHD5	NM_001037601 // CHCHD5 // coiled-coil-helix-coiled-coil-helix domain containing 5 // --
12828049	0.0005079	0.0202	2.25	TMEM72	ENSBTAT00000028270 // TMEM72 // transmembrane protein 72 // --- // 513137
12761717	0.0051979	0.0502	2.25	MSI2	NM_001206656 // MSI2 // musashi homolog 2 (Drosophila) // --- // 505542 /// ENSBTAT0000
12856256	0.0341194	0.137	2.25	RERGL	NM_001105472 // RERGL // RERG/RAS-like // --- // 100125833 /// ENSBTAT00000043032 // RE
12826200	0.0004576	0.0198	2.24	TET1	ENSBTAT00000010614 // TET1 // tet methylcytosine dioxygenase 1 // --- // --- /// ENSBTA
12766193	0.0011768	0.0262	2.24	FMNL1	XM_001255415 // FMNL1 // formin-like 1 // --- // 788992 /// ENSBTAT00000034825 // FMNL1
12877673	0.0032285	0.0397	2.24	C7H19orf21	BC107524 // C7H19orf21 // chromosome 7 open reading frame, human C19orf21 // --- // 505
12737137	0.0039345	0.0436	2.24	RABGAP1L	BC149588 // RABGAP1L // RAB GTPase activating protein 1-like // --- // 540101 /// BC149
12829673	0.0047289	0.0478	2.24	FZD4	NM_001206269 // FZD4 // frizzled family receptor 4 // --- // 445416 /// ENSBTAT00000061
12768020	0.0208144	0.104	2.24	ALDOC	NM_001097984 // ALDOC // aldolase C, fructose-bisphosphate // --- // 504584 /// ENSBTAT
12808788	0.0004036	0.0197	2.23
12903071	0.0010277	0.0249	2.23	SRPX	ENSBTAT00000005604 // SRPX // sushi-repeat containing protein, X-linked // --- // 33791
12786321	0.0108352	0.0727	2.23	ESM1	ENSBTAT00000005529 // ESM1 // endothelial cell-specific molecule 1 // --- // 539571 ///
12795404	0.0213931	0.106	2.23	CCBP2	NM_001015581 // CCBP2 // chemokine binding protein 2 // --- // 512583 /// ENSBTAT000000
12895494	0.031357	0.131	2.23	CORO2A	NM_001038220 // CORO2A // coronin, actin binding protein, 2A // --- // 617620 /// ENSBT
12905894	0.0004748	0.0198	2.22	CXHXorf36	BT021820 // CXHXorf36 // chromosome X open reading frame, human CXorf36 // --- // 61739
12717920	0.0035397	0.0416	2.22	ADA	ENSBTAT00000006947 // ADA // adenosine deaminase // --- // 280712 /// NM_173887 // ADA
12908599	0.0058134	0.0527	2.22	LANCL3	NM_001206408 // LANCL3 // LanC lantibiotic synthetase component C-like 3 (bacterial) //
12675375	0.0062237	0.0542	2.22
12734684	5.04e-05	0.0181	2.21	TNNT2	ENSBTAT00000064811 // TNNT2 // troponin T type 2 (cardiac) // --- // 286816 /// ENSBTAT
12837869	7.98e-05	0.0181	2.21	CXXC11	ENSBTAT00000057411 // CXXC11 // CXXC finger protein 11 // --- // 511818
12739839	8.08e-05	0.0181	2.21	PLEKHN1	ENSBTAT00000019320 // PLEKHN1 // pleckstrin homology domain containing, family N member
12818189	0.0002131	0.0186	2.21	CASKIN1	XM_002697860 // CASKIN1 // CASK interacting protein 1 // --- // 614560 /// ENSBTAT00000
12891106	0.0003134	0.0194	2.21	STX17	NM_001034606 // STX17 // syntaxin 17 // --- // 534304 /// ENSBTAT00000010541 // STX17 /
12813124	0.0013355	0.0275	2.21	ZNF394	ENSBTAT00000021549 // ZNF394 // zinc finger protein 394 // --- // 522836 /// NM_0010779
12841088	0.0057273	0.0524	2.21	SLC35D1	NM_001082459 // SLC35D1 // solute carrier family 35 (UDP-glucuronic acid/UDP-N-acetylga
12907479	0.0059046	0.053	2.21	GK	NM_001075236 // GK // glycerol kinase // --- // 505987 /// ENSBTAT00000030932 // GK //
12788637	0.0076088	0.0603	2.21	SERPINA3-1	NM_174768 // SERPINA3-1 // serpin peptidase inhibitor, clade A (alpha-1 antiproteinase,
12795364	0.0101558	0.0702	2.21	GLT8D1	NM_001015579 // GLT8D1 // glycosyltransferase 8 domain containing 1 // --- // 512192 //
12873413	0.0104488	0.0713	2.21	KDR	NM_001110000 // KDR // kinase insert domain receptor (a type III receptor tyrosine kina
12767437	0.0175426	0.0948	2.21	PECAM1	NM_174571 // PECAM1 // platelet/endothelial cell adhesion molecule // --- // 282303 ///
12678147	0.000118	0.0181	2.19
12853822	0.0001532	0.0181	2.19	NFE2L3	NM_001077899 // NFE2L3 // nuclear factor (erythroid-derived 2)-like 3 // --- // 510807
12861386	0.0002385	0.0186	2.19	CLEC1A	NM_001076081 // CLEC1A // C-type lectin domain family 1, member A // --- // 536944 ///
12756446	0.0003089	0.0194	2.19	ECH1	BC102084 // ECH1 // enoyl CoA hydratase 1, peroxisomal // --- // 507431
12898565	0.0006805	0.0217	2.19	ZBTB24	NM_001205737 // ZBTB24 // zinc finger and BTB domain containing 24 // --- // 539966 ///
12686004	0.0016569	0.0294	2.19	ROBO1	NM_001192888 // ROBO1 // roundabout, axon guidance receptor, homolog 1 (Drosophila) //
12851777	0.0017907	0.0304	2.19	SLC25A40	NM_001076299 // SLC25A40 // solute carrier family 25, member 40 // --- // 613948 /// BC
12811186	0.0024774	0.0352	2.19	MIR2383	NR_031246 // MIR2383 // microRNA mir-2383 // --- // 100313180
12857922	0.0055364	0.0515	2.19	PTPRB	NM_001205297 // PTPRB // protein tyrosine phosphatase, receptor type, B // --- // 50569
12790479	0.00576	0.0524	2.19	DNAJA4	NM_001102120 // DNAJA4 // DnaJ (Hsp40) homolog, subfamily A, member 4 // --- // 528615
12721190	0.0092909	0.0668	2.19	LOC782061	NM_001166223 // LOC782061 // aldo-keto reductase family 1, member C1-like // --- // 782
12727552	5.31e-05	0.0181	2.18	OR6Q1	XM_002693758 // OR6Q1 // olfactory receptor, family 6, subfamily Q, member 1 // --- //
12853428	0.0005177	0.0204	2.18	CYP51A1	NM_001025319 // CYP51A1 // cytochrome P450, family 51, subfamily A, polypeptide 1 // --
12768562	0.000857	0.0234	2.18	TRPV2	NM_001024493 // TRPV2 // transient receptor potential cation channel, subfamily V, memb
12684671	0.0027019	0.0365	2.18	COLQ	NM_001035297 // COLQ // collagen-like tail subunit (single strand of homotrimer) of asy
12913433	0.0033753	0.0407	2.18
12846824	0.0084464	0.0638	2.18	DEM1	NM_001081608 // DEM1 // defects in morphology 1 homolog (S. cerevisiae) // --- // 53888
12889543	0.0148478	0.0869	2.18	TDRD7	NM_001100309 // TDRD7 // tudor domain containing 7 // --- // 506702 /// ENSBTAT00000004
12876511	0.0165161	0.0922	2.18	MIR340	NR_031208 // MIR340 // microRNA mir-340 // --- // 100313037
12727727	6.08e-05	0.0181	2.17	STX3	NM_001101971 // STX3 // syntaxin 3 // --- // 513275 /// ENSBTAT00000017032 // STX3 // s
12779057	9.84e-05	0.0181	2.17	OBFC2A	NM_001098124 // OBFC2A // oligonucleotide/oligosaccharide-binding fold containing 2A //
12675363	0.0001508	0.0181	2.17
12837399	0.0003506	0.0196	2.17	GDAP2	ENSBTAT00000021791 // GDAP2 // ganglioside induced differentiation associated protein 2
12804755	0.0003762	0.0197	2.17	PRP-VII	NM_001012286 // PRP-VII // prolactin-related protein VII // --- // 497206 /// ENSBTAT00
12675353	0.0004746	0.0198	2.17
12875596	0.0008764	0.0236	2.17
12709110	0.0013081	0.0273	2.17	FLT1	NM_001191132 // FLT1 // fms-related tyrosine kinase 1 (vascular endothelial growth fact
12911619	0.0013278	0.0275	2.17
12791138	0.0029882	0.0384	2.17	SEMA7A	NM_001206185 // SEMA7A // semaphorin 7A, GPI membrane anchor (John Milton Hagen blood g
12710603	0.0041875	0.0451	2.17	ZDHHC20	NM_001076388 // ZDHHC20 // zinc finger, DHHC-type containing 20 // --- // 615659 /// EN
12675323	0.0005852	0.0208	2.16
12755803	0.007123	0.0583	2.16	TGFB1	ENSBTAT00000027261 // TGFB1 // transforming growth factor, beta 1 // --- // 282089
12879523	8.29e-05	0.0181	2.15	GRK6	NM_001191530 // GRK6 // G protein-coupled receptor kinase 6 // --- // 521413 /// NM_001
12680013	0.0001749	0.0181	2.15	LIPH	XM_589466 // LIPH // lipase, member H // --- // 512028 /// ENSBTAT00000036044 // LIPH /
12744952	0.0001984	0.0186	2.15	C17H5orf52	NM_001145133 // C17H5orf52 // chromosome 17 open reading frame, human C5orf52 // --- //
12891953	0.0002344	0.0186	2.15	PALLD	ENSBTAT00000001432 // PALLD // palladin, cytoskeletal associated protein // --- // 6176
12859755	0.0028545	0.0375	2.15	CSAD	XM_002687241 // CSAD // cysteine sulfinic acid decarboxylase // --- // 516241 /// ENSBT
12675067	0.0053591	0.051	2.15
12786697	0.0069808	0.0578	2.15	EMB	ENSBTAT00000061571 // EMB // embigin // --- // 785366
12837452	0.0169035	0.0932	2.15	C3H1orf210	BC133470 // C3H1orf210 // chromosome 3 open reading frame, human C1orf210 // --- // 509
12701657	0.0215392	0.106	2.15	SLC3A1	NM_001034633 // SLC3A1 // solute carrier family 3 (cystine, dibasic and neutral amino a
12775974	0.0398138	0.149	2.15	TMEM54	NM_001034364 // TMEM54 // transmembrane protein 54 // --- // 509773 /// ENSBTAT00000038
12766824	0.0003603	0.0197	2.14	MIR365-2	NR_031313 // MIR365-2 // microRNA mir-365-2 // --- // 100313311
12675083	0.0004742	0.0198	2.14
12813341	0.0007924	0.0228	2.14	TBC1D24	NM_001046296 // TBC1D24 // TBC1 domain family, member 24 // --- // 529002 /// ENSBTAT00
12780177	0.0041788	0.0451	2.14	NPPC	NM_174125 // NPPC // natriuretic peptide C // --- // 281356 /// ENSBTAT00000043384 // N
12718026	0.0051773	0.0501	2.14	THBD	NM_001166522 // THBD // thrombomodulin // 13q17 // 281529 /// ENSBTAT00000003575 // THB
12845155	0.0070451	0.0581	2.14
12868370	0.0075459	0.0601	2.14	LOH12CR1	NM_001076355 // LOH12CR1 // loss of heterozygosity, 12, chromosomal region 1 // --- //
12912315	0.0010468	0.0251	2.13
12814573	0.0010585	0.0252	2.13	NTN3	NM_001206905 // NTN3 // netrin 3 // --- // 787961 /// ENSBTAT00000063051 // NTN3 // net
12854099	0.005319	0.0507	2.13	ASNS	NM_001075653 // ASNS // asparagine synthetase (glutamine-hydrolyzing) // --- // 514209
12773173	6.16e-05	0.0181	2.12	SECTM1A	ENSBTAT00000034714 // SECTM1A // secreted and transmembrane protein 1A // --- // 751575
12892472	0.0002788	0.0189	2.12	MIR2472	NR_030915 // MIR2472 // microRNA mir-2472 // --- // 100313348
12683540	0.0006003	0.0209	2.12	ATP2C1	NM_175785 // ATP2C1 // ATPase, Ca++ transporting, type 2C, member 1 // --- // 327663 //
12752171	0.0016014	0.0289	2.12	DPY19L3	XM_003583397 // DPY19L3 // dpy-19-like 3 (C. elegans) // --- // 521976 /// ENSBTAT00000
12843090	0.0043904	0.0461	2.12	NIT1	NM_001038023 // NIT1 // nitrilase 1 // --- // 504199 /// ENSBTAT00000026843 // NIT1 //
12727508	0.0076834	0.0607	2.12	ACAT1	NM_001046075 // ACAT1 // acetyl-CoA acetyltransferase 1 // --- // 511082 /// ENSBTAT000
12806818	0.0104427	0.0713	2.12
12888160	0.0143659	0.0851	2.12	ELL2	NM_001191146 // ELL2 // elongation factor, RNA polymerase II, 2 // --- // 782605 /// EN
12743577	0.0002328	0.0186	2.11	KLHL2	NM_001102160 // KLHL2 // kelch-like 2, Mayven (Drosophila) // --- // 533936 /// ENSBTAT
12710548	0.0011061	0.0256	2.11	PCCA	NM_001083509 // PCCA // propionyl CoA carboxylase, alpha polypeptide // --- // 614302 /
12711726	0.0011588	0.026	2.11	PCDH17	NM_001205680 // PCDH17 // protocadherin 17 // --- // 510554 /// ENSBTAT00000013751 // P
12757543	0.001205	0.0264	2.11
12689200	0.0017813	0.0304	2.11	DAAM1	NM_001081588 // DAAM1 // dishevelled associated activator of morphogenesis 1 // --- //
12707396	0.0039087	0.0435	2.11	FAM84A	NM_001034659 // FAM84A // family with sequence similarity 84, member A // --- // 539071
12705349	0.0056193	0.0519	2.11	WDR54	NM_001046086 // WDR54 // WD repeat domain 54 // --- // 511447 /// ENSBTAT00000000617 //
12749712	0.0178839	0.0958	2.11	CDH5	ENSBTAT00000009760 // CDH5 // cadherin 5, type 2 (vascular endothelium) // --- // 41473
12751545	0.0001342	0.0181	2.1	MYH14	ENSBTAT00000003343 // MYH14 // myosin, heavy chain 14, non-muscle // --- // ---
12832464	0.0002531	0.0189	2.1	LOC100300337	XM_002707847 // LOC100300337 // uncharacterized LOC100300337 // --- // 100300337
12740800	0.0003753	0.0197	2.1	VPS13D	NM_001192767 // VPS13D // vacuolar protein sorting 13 homolog D (S. cerevisiae) // ---
12683034	0.0136575	0.0828	2.1	TSPEAR	NM_001206810 // TSPEAR // thrombospondin-type laminin G domain and EAR repeats // --- /
12867545	0.0001141	0.0181	2.09	PMM1	NM_001076083 // PMM1 // phosphomannomutase 1 // --- // 537070 /// ENSBTAT00000005231 //
12800056	0.0009556	0.0245	2.09	FGD5	BT029853 // FGD5 // FYVE, RhoGEF and PH domain containing 5 // --- // 539766
12696285	0.00122	0.0265	2.09	EML5	NM_001206576 // EML5 // echinoderm microtubule associated protein like 5 // --- // 5373
12758477	0.0020553	0.0321	2.09	PHLDB3	NM_001099056 // PHLDB3 // pleckstrin homology-like domain, family B, member 3 // --- //
12675089	0.0022371	0.0338	2.09
12678907	0.0027561	0.0368	2.09	ST3GAL6	NM_001002883 // ST3GAL6 // ST3 beta-galactoside alpha-2,3-sialyltransferase 6 // --- //
12721928	0.0259529	0.118	2.09	SGK3	NM_001193021 // SGK3 // serum/glucocorticoid regulated kinase family, member 3 // --- /
12911103	0.0467193	0.162	2.09
12773891	0.0002749	0.0189	2.08	USP48	ENSBTAT00000009110 // USP48 // ubiquitin specific peptidase 48 // --- // 100141158
12679297	0.0008605	0.0235	2.08	TNFSF10	XM_002684917 // TNFSF10 // tumor necrosis factor (ligand) superfamily, member 10 // ---
12891087	0.0010024	0.0249	2.08	INTS9	NM_001046363 // INTS9 // integrator complex subunit 9 // --- // 533964 /// ENSBTAT00000
12794295	0.0016656	0.0295	2.08	LOC100336474	XM_002697164 // LOC100336474 // rAB43, member RAS oncogene family-like // --- // 100336
12786277	0.0028624	0.0375	2.08	LIFR	NM_001192263 // LIFR // leukemia inhibitory factor receptor alpha // --- // 539504 ///
12840633	0.0029062	0.0378	2.08	APH1A	NM_001034670 // APH1A // anterior pharynx defective 1 homolog A (C. elegans) // --- //
12824957	0.013539	0.0824	2.08	GSR	ENSBTAT00000009363 // GSR // glutathione reductase // --- // 506406
12689173	0.0169463	0.0932	2.08	SENP8	XM_002690488 // SENP8 // SUMO/sentrin specific peptidase family member 8 // --- // 5133
12809835	0.0234433	0.111	2.08	RNF125	NM_001205859 // RNF125 // ring finger protein 125 // --- // 519541 /// ENSBTAT000000040
12913697	0.0004147	0.0197	2.07
12897332	0.0004526	0.0198	2.07	SYNJ2	XM_596626 // SYNJ2 // synaptojanin 2 // --- // 518435 /// ENSBTAT00000039096 // SYNJ2 /
12789974	0.0013916	0.0279	2.07	PSTPIP1	NM_001193040 // PSTPIP1 // proline-serine-threonine phosphatase interacting protein 1 /
12839635	0.0014919	0.0284	2.07	USP33	NM_001101139 // USP33 // ubiquitin specific peptidase 33 // --- // 531706 /// ENSBTAT00
12834190	0.0019282	0.0313	2.07	TMEM135	NM_001035348 // TMEM135 // transmembrane protein 135 // --- // 523885 /// ENSBTAT000000
12841951	0.0077163	0.0608	2.07	GNG11	ENSBTAT00000048797 // GNG11 // guanine nucleotide binding protein (G protein), gamma 11
12865975	0.0137314	0.083	2.07	STK38L	NM_001101092 // STK38L // serine/threonine kinase 38 like // --- // 514787 /// ENSBTAT0
12720703	0.0143929	0.0852	2.07	LOC539690	ENSBTAT00000005511 // LOC539690 // complement component C1q receptor-like // --- // 539
12791724	0.0193023	0.1	2.07	BCL2A1	NM_001037100 // BCL2A1 // BCL2-related protein A1 // --- // 282151 /// ENSBTAT000000009
12843423	7.69e-05	0.0181	2.06	CTPS	NM_001077858 // CTPS // CTP synthase // --- // 506131 /// ENSBTAT00000002131 // CTPS //
12694796	8.4e-05	0.0181	2.06	FAM82A2	NM_001075679 // FAM82A2 // family with sequence similarity 82, member A2 // --- // 5147
12675359	0.0001089	0.0181	2.06
12839963	0.0002332	0.0186	2.06	KCNN3	XM_868686 // KCNN3 // potassium intermediate/small conductance calcium-activated channe
12824574	0.0004146	0.0197	2.06	LETM2	ENSBTAT00000047384 // LETM2 // leucine zipper-EF-hand containing transmembrane protein
12893658	0.0004735	0.0198	2.06	LOC513555	ENSBTAT00000044290 // LOC513555 // proteasome-associated protein ECM29 homolog // --- /
12675331	0.0005455	0.0206	2.06
12827111	0.0005519	0.0206	2.06	RAB4A	ENSBTAT00000049768 // RAB4A // RAB4A, member RAS oncogene family // --- // 615849 /// N
12675337	0.001454	0.0282	2.06
12674673	0.0015523	0.0286	2.06
12825490	0.0018151	0.0306	2.06	DUSP4	NM_001206953 // DUSP4 // dual specificity phosphatase 4 // --- // 540380 /// ENSBTAT000
12778005	0.0024778	0.0352	2.06	GALNT3	NM_001192858 // GALNT3 // UDP-N-acetyl-alpha-D-galactosamine:polypeptide N-acetylgalact
12759052	0.0046346	0.0474	2.06	C18H16orf74	XM_002684426 // C18H16orf74 // chromosome 18 open reading frame, human C16orf74 // ---
12692539	0.0084122	0.0636	2.06	LOC785763	ENSBTAT00000052820 // LOC785763 // 2,3-bisphosphoglycerate mutase pseudogene // --- //
12675343	0.0117143	0.0758	2.06
12732540	0.0128015	0.0798	2.06	KCNE3	XM_606161 // KCNE3 // potassium voltage-gated channel, Isk-related family, member 3 //
12690192	0.0266332	0.12	2.06	S100Z	NM_001192666 // S100Z // S100 calcium binding protein Z // --- // 528723 /// ENSBTAT000
12834781	0.0002085	0.0186	2.05	RCOR2	NM_001206075 // RCOR2 // REST corepressor 2 // --- // 541233 /// ENSBTAT00000010294 //
12723454	0.0011581	0.026	2.05	RGS20	NM_001076327 // RGS20 // regulator of G-protein signaling 20 // --- // 614441 /// ENSBT
12684497	0.001197	0.0263	2.05	HSPBAP1	NM_001014911 // HSPBAP1 // HSPB (heat shock 27kDa) associated protein 1 // --- // 51321
12705176	0.0026147	0.036	2.05	HAAO	NM_001075458 // HAAO // 3-hydroxyanthranilate 3,4-dioxygenase // --- // 510602 /// ENSB
12712609	0.0031366	0.0392	2.05	KBTBD7	XM_584893 // KBTBD7 // kelch repeat and BTB (POZ) domain containing 7 // --- // 539110
12843681	0.0058993	0.0529	2.05	MGST3	NM_001035046 // MGST3 // microsomal glutathione S-transferase 3 // --- // 507346 /// EN
12789434	0.0082414	0.063	2.05	TRAF3	NM_001205586 // TRAF3 // TNF receptor-associated factor 3 // --- // 506182 /// ENSBTAT0
12781280	0.0093776	0.0671	2.05	LDLRAP1	ENSBTAT00000001393 // LDLRAP1 // low density lipoprotein receptor adaptor protein 1 //
12899020	0.0178282	0.0957	2.05	LOC782134	ENSBTAT00000061219 // LOC782134 // myc target protein 1-like // --- // 782134 /// ENSBT
12675341	0.0227032	0.109	2.05
12718774	0.0003994	0.0197	2.04	TOMM34	NM_001193009 // TOMM34 // translocase of outer mitochondrial membrane 34 // --- // 5081
12718754	0.0006689	0.0216	2.04	SLCO4A1	NM_001192727 // SLCO4A1 // solute carrier organic anion transporter family, member 4A1
12883740	0.0033383	0.0405	2.04	SLC25A42	NM_001192032 // SLC25A42 // solute carrier family 25, member 42 // --- // 504608 /// EN
12737200	0.0035664	0.0418	2.04	LPGAT1	NM_001083756 // LPGAT1 // lysophosphatidylglycerol acyltransferase 1 // --- // 541208 /
12710196	0.0054739	0.0514	2.04	RB1	NM_001076907 // RB1 // retinoblastoma 1 // 12q13 // 534712 /// ENSBTAT00000008728 // RB
12813872	0.0084966	0.0638	2.04	XYLT1	XM_002703081 // XYLT1 // xylosyltransferase I // --- // 541295 /// XM_002698037 // XYLT
12906948	0.0127154	0.0795	2.04	AR	NM_001244127 // AR // androgen receptor // Xq26 // 280675 /// ENSBTAT00000030067 // AR
12689920	9.98e-05	0.0181	2.03
12713091	0.0001298	0.0181	2.03	LPAR6	NM_001101284 // LPAR6 // lysophosphatidic acid receptor 6 // --- // 782518 /// ENSBTAT0
12820022	0.0003653	0.0197	2.03	BTAF1	ENSBTAT00000021438 // BTAF1 // BTAF1 RNA polymerase II, B-TFIID transcription factor-as
12687885	0.0004721	0.0198	2.03	B2M	NM_173893 // B2M // beta-2-microglobulin // --- // 280729 /// BC118352 // B2M // beta-2
12812908	0.0005642	0.0206	2.03	SNX29	ENSBTAT00000037460 // SNX29 // sorting nexin 29 // --- // 518366
12830642	0.0007348	0.0222	2.03	SPDYC	XM_591631 // SPDYC // speedy homolog C (Xenopus laevis) // --- // 513874 /// ENSBTAT000
12688394	0.0007771	0.0225	2.03	PLA2G4B	NM_001114657 // PLA2G4B // phospholipase A2, group IVB (cytosolic) // --- // 505485 ///
12814959	0.0010006	0.0249	2.03	CD19	NM_001245998 // CD19 // CD19 molecule // --- // 517359 /// GQ497280 // CD19 // CD19 mol
12733466	0.0017281	0.03	2.03	THY1	NM_001034765 // THY1 // Thy-1 cell surface antigen // --- // 614712 /// ENSBTAT00000026
12682628	0.0059724	0.0533	2.03	CYYR1	NM_001078105 // CYYR1 // cysteine/tyrosine-rich 1 // --- // 768230 /// BC114104 // CYYR
12687970	0.0081418	0.0625	2.03	FUT8	NM_177501 // FUT8 // fucosyltransferase 8 (alpha (1,6) fucosyltransferase) // --- // 28
12817058	0.0001364	0.0181	2.02	TMEM120A	NM_001079600 // TMEM120A // transmembrane protein 120A // --- // 520173 /// ENSBTAT0000
12736678	0.0001414	0.0181	2.02	CDK18	NM_001083473 // CDK18 // cyclin-dependent kinase 18 // --- // 534048 /// ENSBTAT0000001
12882856	0.0003569	0.0197	2.02
12894451	0.0008243	0.0232	2.02	ENTPD4	ENSBTAT00000061167 // ENTPD4 // ectonucleoside triphosphate diphosphohydrolase 4 // ---
12880421	0.0009432	0.0245	2.02	GMIP	ENSBTAT00000020147 // GMIP // GEM interacting protein // --- // 533029 /// NM_001083465
12800670	0.0012982	0.0272	2.02	LOC783221	ENSBTAT00000015450 // LOC783221 // coiled-coil-helix-coiled-coil-helix domain containin
12870641	0.0017749	0.0303	2.02	SLC39A8	NM_001205630 // SLC39A8 // solute carrier family 39 (zinc transporter), member 8 // ---
12828107	0.0033976	0.0408	2.02	ARV1	NM_001035302 // ARV1 // ARV1 homolog (S. cerevisiae) // --- // 515046 /// ENSBTAT000000
12722842	0.0050099	0.0493	2.02	FAM83H	XM_002692552 // FAM83H // family with sequence similarity 83, member H // --- // 524974
12730764	0.0119194	0.0765	2.02	UCP2	ENSBTAT00000004810 // UCP2 // uncoupling protein 2 (mitochondrial, proton carrier) // -
12741360	0.012263	0.0777	2.02	C16H1orf100	ENSBTAT00000047059 // C16H1orf100 // chromosome 16 open reading frame, human C1orf100 /
12846249	0.0009269	0.0242	2.01
12677783	0.0013617	0.0278	2.01
12833967	0.0021934	0.0333	2.01	MGC157405	NM_001083697 // MGC157405 // pregnancy-associated glycoprotein // --- // 518205 /// ENS
12839395	0.0056246	0.052	2.01	ZCCHC11	NM_001206930 // ZCCHC11 // zinc finger, CCHC domain containing 11 // --- // 528986 ///
12855695	0.0001672	0.0181	2	SLC35B4	NM_001192941 // SLC35B4 // solute carrier family 35, member B4 // --- // 613784 /// ENS
12773142	0.0002955	0.019	2
12692713	0.0006441	0.0214	2	MAPKBP1	XM_002700582 // MAPKBP1 // mitogen-activated protein kinase binding protein 1 // --- //
12693208	0.0008345	0.0233	2
12815770	0.0011575	0.026	2	ZNF655	NM_001075261 // ZNF655 // zinc finger protein 655 // --- // 506436 /// ENSBTAT000000258
12861552	0.0015143	0.0285	2	FAM83F	XM_580566 // FAM83F // family with sequence similarity 83, member F // --- // 538476 //
12885658	0.0037372	0.0427	2	PRDM6	NM_001103255 // PRDM6 // PR domain containing 6 // --- // 519857 /// ENSBTAT00000027421
12773167	0.0071696	0.0585	2	RAC3	ENSBTAT00000031159 // RAC3 // ras-related C3 botulinum toxin substrate 3 (rho family, s
12764212	0.0128162	0.0798	2	LGALS3BP	NM_001046316 // LGALS3BP // lectin, galactoside-binding, soluble, 3 binding protein //
12691559	0.0163159	0.0916	2	SLC30A4	XM_002690940 // SLC30A4 // solute carrier family 30 (zinc transporter), member 4 // ---
12811594	0.000504	0.0201	1.99	CLDN3	NM_205801 // CLDN3 // claudin 3 // --- // 404153 /// ENSBTAT00000001810 // CLDN3 // cla
12802416	0.004239	0.0454	1.99	SERPINB9	NM_001075859 // SERPINB9 // serpin peptidase inhibitor, clade B (ovalbumin), member 9 /
12846771	0.0077587	0.061	1.99	LOC538699	XR_083276 // LOC538699 // TAF5-like RNA polymerase II p300/CBP-associated factor-associ
12766588	0.0088749	0.0653	1.99	METTL23	NM_001205508 // METTL23 // methyltransferase like 23 // --- // 100139217 /// ENSBTAT000
12751769	0.0001946	0.0184	1.98	ZNF350	NM_001075708 // ZNF350 // zinc finger protein 350 // --- // 515334 /// ENSBTAT000000174
12713901	0.0008935	0.0239	1.98	CACNB2	ENSBTAT00000029344 // CACNB2 // calcium channel, voltage-dependent, beta 2 subunit // -
12898680	0.0009467	0.0245	1.98	DOPEY1	BC118182 // DOPEY1 // dopey family member 1 // --- // 541096
12815354	0.0011033	0.0256	1.98	ARHGAP17	XM_002698028 // ARHGAP17 // Rho GTPase activating protein 17 // --- // 504245 /// ENSBT
12675085	0.0013649	0.0278	1.98
12707336	0.0016799	0.0296	1.98	FNBP1	NM_001206712 // FNBP1 // formin binding protein 1 // --- // 538717 /// ENSBTAT000000270
12901548	0.0020455	0.032	1.98
12675339	0.0021286	0.0327	1.98
12818082	0.0028409	0.0374	1.98	GDE1	NM_001034686 // GDE1 // glycerophosphodiester phosphodiesterase 1 // --- // 539978 ///
12878448	0.0166304	0.0925	1.98	LPAR2	NM_001192235 // LPAR2 // lysophosphatidic acid receptor 2 // --- // 509748 /// ENSBTAT0
12675371	0.0302018	0.128	1.98
12765578	0.0318075	0.132	1.98	HS3ST3B1	NM_001193139 // HS3ST3B1 // heparan sulfate (glucosamine) 3-O-sulfotransferase 3B1 // -
12845256	0.0001387	0.0181	1.97	DCST1	NM_001192543 // DCST1 // DC-STAMP domain containing 1 // --- // 521797 /// ENSBTAT00000
12783275	0.0001621	0.0181	1.97	ALS2	XM_615861 // ALS2 // amyotrophic lateral sclerosis 2 (juvenile) // --- // 535750 /// EN
12766585	0.000228	0.0186	1.97	LOC100139164	XM_001789265 // LOC100139164 // uncharacterized LOC100139164 // --- // 100139164
12681445	0.0004676	0.0198	1.97	NSUN3	NM_001076001 // NSUN3 // NOP2/Sun domain family, member 3 // --- // 533791 /// ENSBTAT0
12675079	0.0006306	0.0212	1.97
12818583	0.0012344	0.0265	1.97	TMC7	XM_001253597 // TMC7 // transmembrane channel-like 7 // --- // 785640 /// ENSBTAT000000
12675361	0.0015955	0.0289	1.97
12913807	0.0020673	0.0321	1.97
12675063	0.0033153	0.0404	1.97
12675907	0.00953	0.0678	1.97
12676629	0.0110608	0.0734	1.97
12675315	0.0131743	0.0811	1.97
12831698	0.0184695	0.0976	1.97	RAB30	NM_001076229 // RAB30 // RAB30, member RAS oncogene family // --- // 540583 /// ENSBTAT
12681054	0.0294763	0.127	1.97	SHOX2	NM_001205527 // SHOX2 // short stature homeobox 2 // --- // 525900 /// ENSBTAT000000447
12863747	0.0452583	0.159	1.97	CMAS	NM_001035398 // CMAS // cytidine monophosphate N-acetylneuraminic acid synthetase // --
12709974	0.0001908	0.0184	1.96	LOC528412	XM_002691939 // LOC528412 // aTP-binding cassette, sub-family C (CFTR/MRP), member 4-li
12850012	0.00021	0.0186	1.96	NT5C3	NM_001037597 // NT5C3 // 5'-nucleotidase, cytosolic III // --- // 511858 /// BC109771 /
12794425	0.0003406	0.0196	1.96	TIMP4	NM_001045871 // TIMP4 // TIMP metallopeptidase inhibitor 4 // --- // 317694 /// ENSBTAT
12722016	0.0004099	0.0197	1.96	PTK2	NM_001075250 // PTK2 // PTK2 protein tyrosine kinase 2 // --- // 506270 /// ENSBTAT0000
12791566	0.0004632	0.0198	1.96	MIR1282	NR_030822 // MIR1282 // microRNA mir-1282 // --- // 100313396
12729983	0.0009092	0.0241	1.96	OOSP1	NM_001038687 // OOSP1 // oocyte-secreted protein 1 // --- // 616216 /// ENSBTAT00000039
12882076	0.0009726	0.0247	1.96	FAF2	NM_001077020 // FAF2 // Fas associated factor family member 2 // --- // 767948 /// ENSB
12733016	0.0016148	0.029	1.96	FAM168A	NM_001205572 // FAM168A // family with sequence similarity 168, member A // --- // 5386
12715132	0.002024	0.0319	1.96	STK4	NM_001015602 // STK4 // serine/threonine kinase 4 // --- // 514886 /// ENSBTAT000000042
12911709	0.0083649	0.0634	1.96
12692805	0.0230554	0.11	1.96	SNX22	NM_001105500 // SNX22 // sorting nexin 22 // --- // 100125937 /// ENSBTAT00000022377 //
12898308	0.0435718	0.156	1.96	SCML4	NM_001102184 // SCML4 // sex comb on midleg-like 4 (Drosophila) // --- // 535263 /// EN
12793370	0.000143	0.0181	1.95	TBC1D2B	XM_002696662 // TBC1D2B // TBC1 domain family, member 2B // --- // 535927 /// ENSBTAT00
12799597	0.0003698	0.0197	1.95	SEMA3F	XM_002697033 // SEMA3F // sema domain, immunoglobulin domain (Ig), short basic domain,
12723771	0.0004173	0.0197	1.95	SAMD12	NM_001191180 // SAMD12 // sterile alpha motif domain containing 12 // --- // 783254 ///
12764142	0.0016611	0.0295	1.95
12914195	0.0038044	0.0429	1.95
12876529	0.0044955	0.0466	1.95	MIR2461	NR_031213 // MIR2461 // microRNA mir-2461 // --- // 100313468
12741966	0.0133488	0.0817	1.95	CABP1	NM_174254 // CABP1 // calcium binding protein 1 // --- // 281653 /// ENSBTAT00000026714
12805996	0.0001475	0.0181	1.94	JARID2	ENSBTAT00000017189 // JARID2 // jumonji, AT rich interactive domain 2 // --- // 528253
12905937	0.0013314	0.0275	1.94	CTPS2	NM_001076966 // CTPS2 // CTP synthase II // --- // 767849 /// ENSBTAT00000022629 // CTP
12697213	0.0014865	0.0283	1.94	LOC616127	ENSBTAT00000019522 // LOC616127 // 60S ribosomal protein L21 pseudogene // --- // 61612
12775239	0.0017541	0.0301	1.94	CFLAR	NM_001012281 // CFLAR // CASP8 and FADD-like apoptosis regulator // --- // 497199 /// E
12852081	0.0042687	0.0456	1.94	CPED1	ENSBTAT00000003820 // CPED1 // cadherin-like and PC-esterase domain containing 1 // ---
12865696	0.0045398	0.0468	1.94	PIK3C2G	NM_001206512 // PIK3C2G // phosphoinositide-3-kinase, class 2, gamma polypeptide // ---
12675859	0.0051108	0.0498	1.94
12915195	0.0068663	0.0574	1.94
12872538	0.0070517	0.0581	1.94	SH3BP2	NM_001191526 // SH3BP2 // SH3-domain binding protein 2 // --- // 617344 /// ENSBTAT0000
12832873	0.0094017	0.0672	1.94	PAG17	ENSBTAT00000025601 // PAG17 // pregnancy-associated glycoprotein 17 // --- // 337912 //
12907703	0.0216412	0.107	1.94	CETN2	NM_001038515 // CETN2 // centrin, EF-hand protein, 2 // --- // 508601 /// ENSBTAT000000
12903835	0.0347541	0.138	1.94	ARL13A	ENSBTAT00000065707 // ARL13A // ADP-ribosylation factor-like 13A // --- // 512780
12678151	0.0002346	0.0186	1.93
12708472	0.0002913	0.019	1.93	SULT1C4	NM_001080919 // SULT1C4 // sulfotransferase family, cytosolic, 1C, member 4 // --- // 7
12851653	0.0005726	0.0206	1.93	FAM71F2	NM_001046467 // FAM71F2 // family with sequence similarity 71, member F2 // --- // 5400
12689062	0.0007485	0.0222	1.93	LOC511898	ENSBTAT00000003768 // LOC511898 // protein disulfide isomerase family A, member 6 pseud
12690604	0.0014849	0.0283	1.93	MNAT1	NM_001105409 // MNAT1 // menage a trois homolog 1, cyclin H assembly factor (Xenopus la
12783946	0.0045265	0.0468	1.93	SATB2	NM_001206070 // SATB2 // SATB homeobox 2 // --- // 541192 /// ENSBTAT00000021729 // SAT
12797958	0.0055926	0.0519	1.93	GNAT1	ENSBTAT00000023990 // GNAT1 // guanine nucleotide binding protein (G protein), alpha tr
12895926	0.008497	0.0638	1.93	EXTL3	NM_001082473 // EXTL3 // exostoses (multiple)-like 3 // --- // 783970 /// ENSBTAT000000
12900112	0.0154803	0.0887	1.93
12821015	0.0216684	0.107	1.93	SLC35G1	NM_001076470 // SLC35G1 // solute carrier family 35, member G1 // --- // 617598 /// ENS
12850143	0.0265355	0.12	1.93	POLM	NM_001035286 // POLM // polymerase (DNA directed), mu // --- // 513780 /// ENSBTAT00000
12870843	0.0385996	0.146	1.93	FAM114A1	XM_002688202 // FAM114A1 // family with sequence similarity 114, member A1 // --- // 51
12697816	0.0002766	0.0189	1.92	DPF3	XM_001254779 // DPF3 // D4, zinc and double PHD fingers, family 3 // --- // 787359 ///
12911557	0.0007137	0.0221	1.92
12709107	0.0011756	0.0262	1.92	GJB2	NM_001083637 // GJB2 // gap junction protein, beta 2, 26kDa // --- // 407154 /// ENSBTA
12912289	0.0014948	0.0284	1.92
12747410	0.0050457	0.0495	1.92	USP38	ENSBTAT00000001785 // USP38 // ubiquitin specific peptidase 38 // --- // 534262 /// NM_
12911085	0.0087845	0.0649	1.92
12826336	0.0154687	0.0887	1.92	EDARADD	ENSBTAT00000061420 // EDARADD // EDAR-associated death domain // --- // ---
12845002	0.0001343	0.0181	1.91	AK4	NM_001077933 // AK4 // adenylate kinase 4 // --- // 517063 /// BC120077 // AK4 // adeny
12819631	0.0001688	0.0181	1.91	ACSL5	NM_001075650 // ACSL5 // acyl-CoA synthetase long-chain family member 5 // --- // 51415
12872656	0.0002378	0.0186	1.91	AFF1	NM_001191525 // AFF1 // AF4/FMR2 family, member 1 // --- // 781149 /// ENSBTAT000000246
12743071	0.0006184	0.0211	1.91	SLC35E4	NM_001205905 // SLC35E4 // solute carrier family 35, member E4 // --- // 523783 /// ENS
12908446	0.000675	0.0216	1.91	LOC783410	XM_001787590 // LOC783410 // PR domain containing 9 // --- // 783410 /// ENSBTAT0000005
12814786	0.0007358	0.0222	1.91	MIR93	NR_030962 // MIR93 // microRNA mir-93 // --- // 791049
12906383	0.0011054	0.0256	1.91	LOC100138824	XM_002699550 // LOC100138824 // uncharacterized LOC100138824 // --- // 100138824
12798637	0.0011903	0.0263	1.91	OSBPL10	XM_002696885 // OSBPL10 // oxysterol binding protein-like 10 // --- // 507708 /// XM_58
12675335	0.0014197	0.028	1.91
12855730	0.002743	0.0367	1.91	DNAJB9	NM_001193039 // DNAJB9 // DnaJ (Hsp40) homolog, subfamily B, member 9 // --- // 614588
12774809	0.0034595	0.0411	1.91	CHRNA1	NM_176664 // CHRNA1 // cholinergic receptor, nicotinic, alpha 1 (muscle) // --- // 3380
12678143	0.0037462	0.0427	1.91
12881915	0.0045872	0.0471	1.91	SLC44A2	NM_001098139 // SLC44A2 // solute carrier family 44, member 2 // --- // 617624 /// ENSB
12726011	0.0061516	0.054	1.91	KHDRBS3	NM_001083512 // KHDRBS3 // KH domain containing, RNA binding, signal transduction assoc
12871275	0.0159815	0.0905	1.91	SLC30A9	BC102045 // SLC30A9 // solute carrier family 30 (zinc transporter), member 9 // --- //
12915351	0.0001602	0.0181	1.9
12913791	0.000185	0.0184	1.9
12859629	0.0002789	0.0189	1.9	CRELD2	NM_001046191 // CRELD2 // cysteine-rich with EGF-like domains 2 // --- // 515222 /// EN
12787394	0.0004335	0.0197	1.9	EXOC3	NM_001075600 // EXOC3 // exocyst complex component 3 // --- // 513138 /// ENSBTAT000000
12866428	0.0006374	0.0213	1.9	NUAK1	NM_001205496 // NUAK1 // NUAK family, SNF1-like kinase, 1 // --- // 519892 /// ENSBTAT0
12678149	0.0007288	0.0221	1.9
12744994	0.0007422	0.0222	1.9	FNIP2	XM_001787955 // FNIP2 // folliculin interacting protein 2 // --- // 100138353 /// ENSBT
12786748	0.0011707	0.0261	1.9	LRRC70	XM_002702499 // LRRC70 // leucine rich repeat containing 70 // --- // 100295835
12675357	0.0013793	0.0278	1.9
12866047	0.0022764	0.034	1.9	AMHR2	NM_001205328 // AMHR2 // anti-Mullerian hormone receptor, type II // --- // 514963
12829236	0.0022966	0.034	1.9	MIR584-7	NR_031336 // MIR584-7 // microRNA mir-584-7 // --- // 100313474
12680069	0.0025121	0.0355	1.9	ARL13B	BC102960 // ARL13B // ADP-ribosylation factor-like 13B // --- // 512781 /// ENSBTAT0000
12676713	0.0025341	0.0357	1.9
12695051	0.00284	0.0374	1.9	SGPP1	NM_001077931 // SGPP1 // sphingosine-1-phosphate phosphatase 1 // --- // 516881 /// ENS
12773736	0.0030293	0.0386	1.9	SMARCD2	NM_001205462 // SMARCD2 // SWI/SNF related, matrix associated, actin dependent regulato
12815823	0.0053627	0.051	1.9	CLIP2	NM_001192120 // CLIP2 // CAP-GLY domain containing linker protein 2 // --- // 506908 //
12792070	0.0058845	0.0529	1.9	MCEE	NM_001045995 // MCEE // methylmalonyl CoA epimerase // --- // 508170 /// ENSBTAT0000004
12879890	0.0168375	0.093	1.9	PLVAP	NM_001035353 // PLVAP // plasmalemma vesicle associated protein // --- // 524990 /// EN
12775831	0.0285137	0.124	1.9	TFPI	NM_001244204 // TFPI // tissue factor pathway inhibitor (lipoprotein-associated coagula
12858349	0.0002517	0.0189	1.89	GALNT6	NM_001015534 // GALNT6 // UDP-N-acetyl-alpha-D-galactosamine:polypeptide N-acetylgalact
12894994	0.00046	0.0198	1.89	RNF183	NM_001035422 // RNF183 // ring finger protein 183 // --- // 539200 /// ENSBTAT000000060
12676385	0.000662	0.0215	1.89
12826085	0.0010705	0.0253	1.89	CSGALNACT2	NM_001205653 // CSGALNACT2 // chondroitin sulfate N-acetylgalactosaminyltransferase 2 /
12894072	0.0010831	0.0253	1.89	REEP4	NM_001034533 // REEP4 // receptor accessory protein 4 // --- // 519613 /// ENSBTAT00000
12835544	0.0011085	0.0256	1.89	LOC100297566	ENSBTAT00000057552 // LOC100297566 // ribosomal protein S27-like pseudogene // --- // 1
12684254	0.0018445	0.0307	1.89	ZNF295	NM_001083659 // ZNF295 // zinc finger protein 295 // --- // 510136 /// ENSBTAT000000283
12875858	0.0018517	0.0307	1.89	LDB2	NM_001046611 // LDB2 // LIM domain binding 2 // --- // 617976 /// ENSBTAT00000018687 //
12758667	0.0022026	0.0334	1.89	SIAH1	NM_001193193 // SIAH1 // seven in absentia homolog 1 (Drosophila) // --- // 534655 ///
12848053	0.0027823	0.037	1.89	LOC784007	XM_001252441 // LOC784007 // uncharacterized LOC784007 // --- // 784007 /// XM_00358582
12688416	0.0051518	0.05	1.89	CHAC1	NM_001098882 // CHAC1 // ChaC, cation transport regulator homolog 1 (E. coli) // --- //
12895369	0.0062715	0.0545	1.89	LOC616272	XM_002689513 // LOC616272 // Interferon alpha-1-like // --- // 616272 /// ENSBTAT000000
12692622	0.0002224	0.0186	1.88	PHGR1	NM_001206783 // PHGR1 // proline/histidine/glycine-rich 1 // --- // 787749
12836043	0.0002314	0.0186	1.88	SLC6A9	NM_001242343 // SLC6A9 // solute carrier family 6 (neurotransmitter transporter, glycin
12865033	0.0006209	0.0211	1.88	BCL2L14	NM_001015544 // BCL2L14 // BCL2-like 14 (apoptosis facilitator) // --- // 508365 /// EN
12675071	0.000677	0.0217	1.88
12872715	0.0007773	0.0225	1.88
12725482	0.000885	0.0238	1.88	GGH	NM_001105394 // GGH // gamma-glutamyl hydrolase (conjugase, folylpolygammaglutamyl hydr
12870826	0.0009139	0.0242	1.88	C6H4orf19	NM_001104973 // C6H4orf19 // chromosome 6 open reading frame, human C4orf19 // --- // 5
12912703	0.0013666	0.0278	1.88
12914011	0.0013666	0.0278	1.88
12748242	0.0014357	0.0281	1.88	ETFDH	NM_001077130 // ETFDH // electron-transferring-flavoprotein dehydrogenase // --- // 768
12817101	0.0014955	0.0284	1.88	FZD9	XM_599625 // FZD9 // frizzled family receptor 9 // --- // 521364 /// ENSBTAT00000027639
12675373	0.0018342	0.0307	1.88
12676619	0.002159	0.033	1.88
12675087	0.0022641	0.0339	1.88
12794183	0.002265	0.0339	1.88	LOC100294865	XM_002702743 // LOC100294865 // uncharacterized LOC100294865 // --- // 100294865
12761235	0.0028443	0.0374	1.88	ATP6V0A1	NM_174754 // ATP6V0A1 // ATPase, H+ transporting, lysosomal V0 subunit a1 // --- // 286
12710773	0.0050767	0.0497	1.88	SLC46A3	NM_001103303 // SLC46A3 // solute carrier family 46, member 3 // --- // 781117 /// ENSB
12677311	0.0121452	0.0773	1.88
12872072	0.0132572	0.0813	1.88	KIAA1239	XM_002688197 // KIAA1239 // KIAA1239 ortholog // --- // 539460 /// ENSBTAT00000001952 /
12914829	0.0004307	0.0197	1.87
12816397	0.0004743	0.0198	1.87	SLX4	XM_002697885 // SLX4 // SLX4 structure-specific endonuclease subunit homolog (S. cerevi
12766832	0.0005605	0.0206	1.87	MIR2333	NR_030858 // MIR2333 // microRNA mir-2333 // --- // 100313462
12893362	0.0006555	0.0215	1.87	PTPN3	NM_001205687 // PTPN3 // protein tyrosine phosphatase, non-receptor type 3 // --- // 51
12729863	0.0016345	0.0292	1.87	UVRAG	NM_001193026 // UVRAG // UV radiation resistance associated gene // --- // 614285 /// E
12693859	0.0020482	0.032	1.87	SERINC5	XM_002690460 // SERINC5 // serine incorporator 5 // --- // 504658 /// ENSBTAT0000000212
12912207	0.002417	0.0348	1.87
12719162	0.0025935	0.0359	1.87	EDEM2	NM_001101085 // EDEM2 // ER degradation enhancer, mannosidase alpha-like 2 // --- // 51
12837120	0.0039101	0.0435	1.87	TXNDC12	NM_001015536 // TXNDC12 // thioredoxin domain containing 12 (endoplasmic reticulum) //
12746657	0.0046086	0.0472	1.87	ELMOD2	NM_001075705 // ELMOD2 // ELMO/CED-12 domain containing 2 // --- // 515278 /// ENSBTAT0
12869667	0.0087663	0.0649	1.87	SLC39A8	NM_001205630 // SLC39A8 // solute carrier family 39 (zinc transporter), member 8 // ---
12860698	0.0325891	0.134	1.87	FGF23	XM_002687880 // FGF23 // fibroblast growth factor 23 // --- // 530239 /// ENSBTAT000000
12894756	0.0004079	0.0197	1.86	KDM4C	ENSBTAT00000061259 // KDM4C // lysine (K)-specific demethylase 4C // --- // 535671
12675105	0.0009471	0.0245	1.86
12826058	0.0010014	0.0249	1.86	LGALS8	NM_001045954 // LGALS8 // lectin, galactoside-binding, soluble, 8 // --- // 506977 ///
12770765	0.0010988	0.0256	1.86	GPS2	ENSBTAT00000013888 // GPS2 // G protein pathway suppressor 2 // --- // 518494 /// NM_00
12757454	0.001654	0.0294	1.86	ZDHHC1	NM_001075747 // ZDHHC1 // zinc finger, DHHC-type containing 1 // --- // 517066 /// ENSB
12786958	0.0017607	0.0302	1.86	ITGA2	NM_001166499 // ITGA2 // integrin, alpha 2 (CD49B, alpha 2 subunit of VLA-2 receptor) /
12911285	0.0020857	0.0323	1.86
12776378	0.0022925	0.034	1.86	PTPN4	NM_001192946 // PTPN4 // protein tyrosine phosphatase, non-receptor type 4 (megakaryocy
12749645	0.0033849	0.0407	1.86	CEACAM1	NM_205788 // CEACAM1 // carcinoembryonic antigen-related cell adhesion molecule 1 (bili
12720762	0.0042355	0.0454	1.86	CREM	NM_001034710 // CREM // cAMP responsive element modulator // --- // 540605 /// ENSBTAT0
12734422	0.004305	0.0457	1.86	CD34	NM_174009 // CD34 // CD34 molecule // --- // 281051 /// ENSBTAT00000013963 // CD34 // C
12777221	0.0058743	0.0529	1.86	RBMS1	NM_001035361 // RBMS1 // RNA binding motif, single stranded interacting protein 1 // --
12778973	0.0071562	0.0584	1.86	PLCD4	ENSBTAT00000044026 // PLCD4 // phospholipase C, delta 4 // --- // 540771 /// NM_0010464
12675439	0.0073748	0.0594	1.86
12886230	0.0319507	0.132	1.86	TNFAIP8	NM_001083711 // TNFAIP8 // tumor necrosis factor, alpha-induced protein 8 // --- // 529
12732172	0.0003055	0.0194	1.85	NXPE4	NM_001034503 // NXPE4 // neurexophilin and PC-esterase domain family, member 4 // --- /
12832863	0.0003313	0.0196	1.85	PAG18	NM_176626 // PAG18 // pregnancy-associated glycoprotein 18 // --- // 337911 /// ENSBTAT
12777296	0.0006246	0.0211	1.85	FBXO42	BC112852 // FBXO42 // F-box protein 42 // --- // 527807 /// ENSBTAT00000011217 // FBXO4
12911607	0.0007076	0.0221	1.85
12913237	0.0007914	0.0228	1.85
12675333	0.0012034	0.0264	1.85
12687739	0.0022197	0.0336	1.85	LOC100296333	XM_002691026 // LOC100296333 // uncharacterized LOC100296333 // --- // 100296333
12846750	0.002293	0.034	1.85	PTGFRN	XM_618406 // PTGFRN // prostaglandin F2 receptor negative regulator // --- // 538209 //
12791243	0.0024755	0.0352	1.85
12742416	0.0029383	0.038	1.85	OSBP2	NM_001192252 // OSBP2 // oxysterol binding protein 2 // --- // 510311 /// ENSBTAT000000
12707387	0.0107427	0.0724	1.85	CDC42EP3	NM_001046444 // CDC42EP3 // CDC42 effector protein (Rho GTPase binding) 3 // --- // 538
12844744	0.0119807	0.0768	1.85	SMAP2	NM_001075670 // SMAP2 // small ArfGAP2 // --- // 514465 /// ENSBTAT00000029227 // SMAP2
12729888	0.0121385	0.0773	1.85	C15H11orf52	XM_002692990 // C15H11orf52 // chromosome 15 open reading frame, human C11orf52 // ---
12776831	0.0006001	0.0209	1.84	DIS3L2	NM_001192506 // DIS3L2 // DIS3 mitotic control homolog (S. cerevisiae)-like 2 // --- //
12814830	0.0010309	0.0249	1.84	FAM18A	XM_002697961 // FAM18A // family with sequence similarity 18, member A // --- // 100139
12739525	0.0010377	0.025	1.84	PLCH2	ENSBTAT00000003213 // PLCH2 // phospholipase C, eta 2 // --- // 514590
12689280	0.0012723	0.027	1.84	PCNX	XM_002691050 // PCNX // pecanex homolog (Drosophila) // --- // 514244 /// ENSBTAT000000
12743060	0.0017279	0.03	1.84	VSIG10	XM_002694505 // VSIG10 // V-set and immunoglobulin domain containing 10 // --- // 52325
12810066	0.0019408	0.0314	1.84	LOC529859	ENSBTAT00000016012 // LOC529859 // ectopic P granules protein 5 homolog // --- // 52985
12721746	0.0019513	0.0315	1.84	RDH10	NM_174734 // RDH10 // retinol dehydrogenase 10 (all-trans) // --- // 282852 /// ENSBTAT
12874999	0.0020238	0.0319	1.84	PRKG2	ENSBTAT00000003877 // PRKG2 // protein kinase, cGMP-dependent, type II // --- // 533330
12704278	0.0028979	0.0378	1.84	MERTK	NM_001192024 // MERTK // c-mer proto-oncogene tyrosine kinase // --- // 504429 /// ENSB
12855975	0.0029721	0.0382	1.84	BET1	ENSBTAT00000004440 // BET1 // blocked early in transport 1 homolog (S. cerevisiae) // -
12705913	0.003606	0.0419	1.84	SLC5A6	NM_001046219 // SLC5A6 // solute carrier family 5 (sodium-dependent vitamin transporter
12888844	0.0055537	0.0516	1.84	MIR24-1	NR_031098 // MIR24-1 // microRNA mir-24-1 // --- // 100313011
12686165	0.0058866	0.0529	1.84	JAM2	NM_001083736 // JAM2 // junctional adhesion molecule 2 // --- // 538846 /// ENSBTAT0000
12879457	0.0151981	0.088	1.84	2003-03-01	NM_001077941 // MARCH3 // membrane-associated ring finger (C3HC4) 3 // --- // 520348 //
12863952	0.0288037	0.125	1.84	IGF1	NM_001077828 // IGF1 // insulin-like growth factor 1 (somatomedin C) // --- // 281239 /
12892478	0.0004314	0.0197	1.83	MIR2473	NR_030916 // MIR2473 // microRNA mir-2473 // --- // 100313469
12681636	0.000472	0.0198	1.83	TIAM1	BC126554 // TIAM1 // T-cell lymphoma invasion and metastasis 1 // --- // 536517 /// ENS
12860556	0.0007258	0.0221	1.83	SLC38A1	ENSBTAT00000001147 // SLC38A1 // solute carrier family 38, member 1 // --- // 527491
12717580	0.0007458	0.0222	1.83
12811180	0.0010946	0.0255	1.83	MIR106B	NR_031128 // MIR106B // microRNA mir-106b // --- // 100312991
12862452	0.0012777	0.027	1.83	TTC38	NM_001105259 // TTC38 // tetratricopeptide repeat domain 38 // --- // 616471 /// ENSBTA
12898166	0.0012948	0.0272	1.83	MYO6	NM_001206072 // MYO6 // myosin VI // --- // 535127 /// ENSBTAT00000022276 // MYO6 // my
12710288	0.0017531	0.0301	1.83	DGKH	XM_002691824 // DGKH // diacylglycerol kinase, eta // --- // 537533 /// ENSBTAT00000018
12676931	0.0023609	0.0344	1.83
12893713	0.003075	0.0389	1.83	TBC1D2	NM_001101981 // TBC1D2 // TBC1 domain family, member 2 // --- // 513828 /// ENSBTAT0000
12764792	0.0035325	0.0416	1.83	KCNJ12	NM_001024690 // KCNJ12 // potassium inwardly-rectifying channel, subfamily J, member 12
12840786	0.003573	0.0418	1.83	TESK2	XM_002686425 // TESK2 // testis-specific kinase 2 // --- // 539979 /// ENSBTAT000000149
12704770	0.0036578	0.0422	1.83	GREB1	NM_001205631 // GREB1 // growth regulation by estrogen in breast cancer 1 // --- // 508
12702080	0.004443	0.0464	1.83	PKDCC	NM_001206721 // PKDCC // protein kinase domain containing, cytoplasmic homolog (mouse)
12908260	0.006692	0.0566	1.83	CA5B	NM_001080908 // CA5B // carbonic anhydrase VB, mitochondrial // --- // 514494 /// ENSBT
12723793	0.0070102	0.058	1.83	SLC10A5	XM_002692810 // SLC10A5 // solute carrier family 10 (sodium/bile acid cotransporter fam
12682261	0.0112243	0.0742	1.83	FBXO40	NM_001206393 // FBXO40 // F-box protein 40 // --- // 613597 /// ENSBTAT00000019285 // F
12878199	0.0195571	0.101	1.83	CALR3	ENSBTAT00000013175 // CALR3 // calreticulin 3 // --- // 508555 /// NM_001038514 // CALR
12675909	0.0271395	0.121	1.83
12775358	0.0003733	0.0197	1.82	BSDC1	NM_001035026 // BSDC1 // BSD domain containing 1 // --- // 505545 /// NM_001253722 // B
12856385	0.0005221	0.0204	1.82
12901028	0.0005987	0.0209	1.82	SLC35A1	NM_001034637 // SLC35A1 // solute carrier family 35 (CMP-sialic acid transporter), memb
12756549	0.0013477	0.0276	1.82	IL34	NM_001100324 // IL34 // interleukin 34 // --- // 508292 /// ENSBTAT00000049652 // IL34
12695516	0.001459	0.0282	1.82	SIX4	XM_002691022 // SIX4 // SIX homeobox 4 // --- // 526104 /// ENSBTAT00000065236 // SIX4
12773293	0.0016315	0.0292	1.82	SECTM1	NM_001083787 // SECTM1 // secreted and transmembrane 1 // --- // 781942 /// ENSBTAT0000
12700336	0.001741	0.0301	1.82	ZBTB34	XM_002691586 // ZBTB34 // zinc finger and BTB domain containing 34 // --- // 518084 ///
12709089	0.0031852	0.0395	1.82	DNAJC3	NM_174756 // DNAJC3 // DnaJ (Hsp40) homolog, subfamily C, member 3 // --- // 286770 ///
12683384	0.0034581	0.0411	1.82	PROS1	NM_174438 // PROS1 // protein S (alpha) // --- // 282006 /// ENSBTAT00000032377 // PROS
12867879	0.0036551	0.0422	1.82	NXPH4	XM_002687567 // NXPH4 // neurexophilin 4 // --- // 539535 /// ENSBTAT00000063021 // NXP
12675325	0.0041116	0.0447	1.82
12915345	0.0046897	0.0477	1.82
12745816	0.0049653	0.0492	1.82	HSPA4L	XM_865774 // HSPA4L // heat shock 70kDa protein 4-like // --- // 506096 /// ENSBTAT0000
12730037	0.0090434	0.066	1.82	IL18BP	ENSBTAT00000064052 // IL18BP // interleukin 18 binding protein // --- // 617470
12729396	0.0474251	0.163	1.82	RHOG	NM_001080305 // RHOG // ras homolog gene family, member G (rho G) // --- // 538559 ///
12823295	0.0002207	0.0186	1.81	MCPH1	NM_001103315 // MCPH1 // microcephalin 1 // --- // 100125236 /// ENSBTAT00000031604 //
12745528	0.000263	0.0189	1.81	P2RX4	NM_001034049 // P2RX4 // purinergic receptor P2X, ligand-gated ion channel, 4 // --- //
12750559	0.0002955	0.019	1.81
12891664	0.0004216	0.0197	1.81	ERMP1	XM_002704971 // ERMP1 // endoplasmic reticulum metallopeptidase 1 // --- // 541094 ///
12729927	0.0004882	0.0198	1.81	ACER3	NM_001102285 // ACER3 // alkaline ceramidase 3 // --- // 615110 /// ENSBTAT00000052101
12680540	0.0019966	0.0318	1.81	CRYBG3	ENSBTAT00000032404 // CRYBG3 // beta-gamma crystallin domain containing 3 // --- // ---
12915009	0.00241	0.0348	1.81
12703510	0.0094133	0.0672	1.81
12835724	0.010194	0.0703	1.81	DBT	NM_173905 // DBT // dihydrolipoamide branched chain transacylase E2 // --- // 280759 //
12676647	0.0231295	0.111	1.81
12676667	0.0239703	0.113	1.81
12696199	0.0396627	0.149	1.81	HOMER1	NM_001076052 // HOMER1 // homer homolog 1 (Drosophila) // --- // 535311 /// ENSBTAT0000
12820770	0.000307	0.0194	1.8	TCF7L2	ENSBTAT00000065150 // TCF7L2 // transcription factor 7-like 2 (T-cell specific, HMG-box
12744620	0.0003979	0.0197	1.8	KSR2	NM_001206862 // KSR2 // kinase suppressor of ras 2 // --- // 617325 /// ENSBTAT00000061
12686938	0.0005728	0.0206	1.8	LSS	NM_001046564 // LSS // lanosterol synthase (2,3-oxidosqualene-lanosterol cyclase) // --
12758020	0.0006166	0.0211	1.8	C18H16orf48	BC102534 // C18H16orf48 // chromosome 18 open reading frame, human C16orf48 // --- // 5
12815621	0.0007627	0.0224	1.8	ABCA3	NM_001113746 // ABCA3 // ATP-binding cassette, sub-family A (ABC1), member 3 // --- //
12853440	0.0019526	0.0315	1.8	FAM221A	NM_001075195 // FAM221A // family with sequence similarity 221, member A // --- // 5052
12674653	0.0020576	0.0321	1.8
12676933	0.0030764	0.0389	1.8
12699276	0.0031524	0.0393	1.8	PRKCE	NM_001111120 // PRKCE // protein kinase C, epsilon // --- // 507041 /// ENSBTAT00000027
12675329	0.0032746	0.0401	1.8
12841695	0.0038039	0.0429	1.8	LOC783721	BC146043 // LOC783721 // uncharacterized LOC783721 // --- // 783721
12915031	0.0063508	0.0549	1.8
12854591	0.0076925	0.0607	1.8	JHDM1D	XM_002687068 // JHDM1D // jumonji C domain containing histone demethylase 1 homolog D (
12806528	0.0096708	0.0684	1.8	FAM83B	NM_001205795 // FAM83B // family with sequence similarity 83, member B // --- // 540231
12827415	0.0106958	0.0723	1.8	B3GALNT2	NM_001103343 // B3GALNT2 // beta-1,3-N-acetylgalactosaminyltransferase 2 // --- // 1001
12908736	0.011739	0.0759	1.8	SLC9A7	XM_002700063 // SLC9A7 // solute carrier family 9 (sodium/hydrogen exchanger), member 7
12846504	0.0003886	0.0197	1.79	LOC535643	ENSBTAT00000033290 // LOC535643 // microtubule-associated serine/threonine-protein kina
12676939	0.0005435	0.0206	1.79
12762480	0.0008005	0.0229	1.79	SLC38A10	BC153282 // SLC38A10 // solute carrier family 38, member 10 // --- // 509536 /// ENSBTA
12855867	0.0015462	0.0286	1.79	FAM3C	NM_001099147 // FAM3C // family with sequence similarity 3, member C // --- // 615690 /
12782411	0.002026	0.0319	1.79	ANKRD44	ENSBTAT00000029218 // ANKRD44 // serine/threonine-protein phosphatase 6 regulatory anky
12676349	0.0022774	0.034	1.79
12851936	0.0023388	0.0342	1.79	FKBP14	NM_001076391 // FKBP14 // FK506 binding protein 14, 22 kDa // --- // 615718 /// BC10753
12826384	0.0025944	0.0359	1.79	TSPAN15	NM_001075829 // TSPAN15 // tetraspanin 15 // --- // 522371 /// ENSBTAT00000031335 // TS
12755558	0.0030047	0.0385	1.79	MEGF8	XM_002701886 // MEGF8 // multiple EGF-like-domains 8 // --- // 615688 /// XM_002695147
12842552	0.0039249	0.0436	1.79	TIE1	NM_173965 // TIE1 // tyrosine kinase with immunoglobulin-like and EGF-like domains 1 //
12888119	0.0071532	0.0584	1.79	SRA1	NM_001079642 // SRA1 // steroid receptor RNA activator 1 // --- // 780787 /// ENSBTAT00
12841676	0.0113805	0.0748	1.79	LOC782781	NM_001168605 // LOC782781 // uncharacterized LOC782781 // --- // 782781 /// ENSBTAT0000
12676673	0.0220938	0.108	1.79
12823365	0.0418594	0.153	1.79	LOC100335165	ENSBTAT00000066254 // LOC100335165 // beta-defensin C7-like // --- // 100335165 /// ENS
12768031	0.0007129	0.0221	1.78	SPAG5	NM_001205549 // SPAG5 // sperm associated antigen 5 // --- // 504585 /// ENSBTAT0000001
12835619	0.0007964	0.0228	1.78	MIR1940	NR_030845 // MIR1940 // microRNA mir-1940 // --- // 100313293
12832763	0.0009044	0.024	1.78	PAG4	ENSBTAT00000030184 // PAG4 // pregnancy-associated glycoprotein 4 // --- // 337898 ///
12846121	0.0011287	0.0257	1.78	NPR1	NM_001192751 // NPR1 // natriuretic peptide receptor A/guanylate cyclase A (atrionatriu
12913907	0.0012109	0.0264	1.78
12687385	0.001399	0.0279	1.78	LRCH3	XM_002684799 // LRCH3 // leucine-rich repeats and calponin homology (CH) domain contain
12720297	0.0033707	0.0406	1.78	TRPC4AP	NM_001206830 // TRPC4AP // transient receptor potential cation channel, subfamily C, me
12749828	0.0060033	0.0534	1.78
12675345	0.006728	0.0567	1.78
12676691	0.0092366	0.0667	1.78
12867044	0.0149926	0.0874	1.78	OSBPL8	ENSBTAT00000005804 // OSBPL8 // oxysterol binding protein-like 8 // --- // 533350
12914029	0.0243615	0.114	1.78
12797808	0.0265503	0.12	1.78	MIR2370	NR_030980 // MIR2370 // microRNA mir-2370 // --- // 100313422
12793730	0.0002853	0.019	1.77	LOC616063	XM_003587544 // LOC616063 // myeloid-associated differentiation marker-like // --- // 6
12752645	0.0003014	0.0193	1.77	SLC7A6	NM_001075937 // SLC7A6 // solute carrier family 7 (amino acid transporter light chain,
12832853	0.0003978	0.0197	1.77	PAG16	NM_176625 // PAG16 // pregnancy-associated glycoprotein 16 // --- // 337910 /// ENSBTAT
12828084	0.0004418	0.0198	1.77	RASGEF1A	ENSBTAT00000009038 // RASGEF1A // RasGEF domain family, member 1A // --- // 514877 ///
12716611	0.000503	0.0201	1.77	ARFGEF2	NM_001205652 // ARFGEF2 // ADP-ribosylation factor guanine nucleotide-exchange factor 2
12911617	0.0008887	0.0238	1.77
12680588	0.0013346	0.0275	1.77	SLC33A1	NM_001075758 // SLC33A1 // solute carrier family 33 (acetyl-CoA transporter), member 1
12912575	0.0019137	0.0311	1.77
12765795	0.0027107	0.0365	1.77	GRN	NM_001077014 // GRN // granulin // --- // 767942 /// ENSBTAT00000054338 // GRN // granu
12795207	0.0033238	0.0404	1.77	RASSF1	NM_001075442 // RASSF1 // Ras association (RalGDS/AF-6) domain family member 1 // --- /
12762454	0.0035399	0.0416	1.77	ACE	NM_001206668 // ACE // angiotensin I converting enzyme // --- // 509484 /// ENSBTAT0000
12700959	0.0041016	0.0447	1.77	HS1BP3	NM_001046280 // HS1BP3 // HCLS1 binding protein 3 // --- // 526092 /// BC105354 // HS1B
12752815	0.0063326	0.0548	1.77	PHLPP2	NM_001206193 // PHLPP2 // PH domain and leucine rich repeat protein phosphatase 2 // --
12683452	0.0088088	0.065	1.77	IFNAR2	NM_174553 // IFNAR2 // interferon (alpha, beta and omega) receptor 2 // --- // 282258 /
12775344	0.0088367	0.0651	1.77	RALB	NM_001097985 // RALB // v-ral simian leukemia viral oncogene homolog B (ras related; GT
12818814	0.0119711	0.0768	1.77	MIR2397	NR_031173 // MIR2397 // microRNA mir-2397 // --- // 100313479
12676707	0.0271952	0.121	1.77
12866487	0.0002927	0.019	1.76	UHRF1BP1L	NM_001192527 // UHRF1BP1L // UHRF1 binding protein 1-like // --- // 520720 /// ENSBTAT0
12678091	0.0003126	0.0194	1.76
12848492	0.0003296	0.0196	1.76
12764980	0.0003406	0.0196	1.76	SREBF1	NM_001113302 // SREBF1 // sterol regulatory element binding transcription factor 1 // -
12912121	0.0003803	0.0197	1.76
12735466	0.0004301	0.0197	1.76	FBXO2	NM_001075569 // FBXO2 // F-box protein 2 // --- // 512589 /// ENSBTAT00000054333 // FBX
12782012	0.0006147	0.021	1.76	CCNT2	NM_001192531 // CCNT2 // cyclin T2 // --- // 521089 /// ENSBTAT00000018816 // CCNT2 //
12690050	0.0006968	0.0219	1.76	F2RL1	NM_001046283 // F2RL1 // coagulation factor II (thrombin) receptor-like 1 // --- // 526
12760394	0.0007471	0.0222	1.76	WSB1	ENSBTAT00000006593 // WSB1 // WD repeat and SOCS box containing 1 // --- // 614851
12869099	0.0007589	0.0223	1.76	LOC782483	ENSBTAT00000052535 // LOC782483 // coiled-coil domain-containing protein 72 pseudogene
12900780	0.0009788	0.0247	1.76	SLC17A5	NM_001205974 // SLC17A5 // solute carrier family 17 (anion/sugar transporter), member 5
12675347	0.0010258	0.0249	1.76
12696584	0.0032629	0.04	1.76	TRIM36	NM_001206726 // TRIM36 // tripartite motif containing 36 // --- // 539023 /// ENSBTAT00
12884534	0.0037043	0.0424	1.76	CSF1R	NM_001075403 // CSF1R // colony stimulating factor 1 receptor // --- // 509418 /// ENSB
12815028	0.0043783	0.046	1.76	MIR2384-1	NR_031243 // MIR2384-1 // microRNA mir-2384-1 // --- // 100313425 /// NR_031247 // MIR2
12825884	0.0052179	0.0503	1.76	HK1	NM_001012668 // HK1 // hexokinase 1 // --- // 280817 /// ENSBTAT00000016432 // HK1 // h
12787571	0.0057111	0.0523	1.76	ANKRD33B	NM_001205847 // ANKRD33B // ankyrin repeat domain 33B // --- // 518403 /// ENSBTAT00000
12691139	0.0057471	0.0524	1.76	PAK6	NM_001192198 // PAK6 // p21 protein (Cdc42/Rac)-activated kinase 6 // --- // 539224 ///
12864062	0.0110378	0.0733	1.76	KITLG	NM_174375 // KITLG // KIT ligand // --- // 281885 /// ENSBTAT00000023349 // KITLG // KI
12842602	0.0128197	0.0798	1.76	S1PR1	NM_001013585 // S1PR1 // sphingosine-1-phosphate receptor 1 // --- // 281135 /// ENSBTA
12766496	0.0147029	0.0864	1.76	TLCD1	NM_001105042 // TLCD1 // TLC domain containing 1 // --- // 100125601 /// ENSBTAT0000000
12722176	0.0148439	0.0869	1.76	FAM49B	BC105327 // FAM49B // family with sequence similarity 49, member B // --- // 510019 ///
12840214	0.0167167	0.0928	1.76	EPS15	NM_001098087 // EPS15 // epidermal growth factor receptor pathway substrate 15 // --- /
12869929	0.0177575	0.0954	1.76	ANXA5	ENSBTAT00000028988 // ANXA5 // annexin A5 // --- // 281626 /// NM_001040477 // ANXA5 //
12745734	0.019129	0.0995	1.76	ASCC2	ENSBTAT00000003186 // ASCC2 // activating signal cointegrator 1 complex subunit 2 // --
12680487	0.0003387	0.0196	1.75	ARHGAP31	NM_001205810 // ARHGAP31 // Rho GTPase activating protein 31 // --- // 515490 /// ENSBT
12763500	0.0003408	0.0196	1.75	RHBDF2	XM_002696165 // RHBDF2 // rhomboid 5 homolog 2 (Drosophila) // --- // 517903 /// ENSBTA
12796354	0.0018249	0.0306	1.75	CMTM8	NM_001046358 // CMTM8 // CKLF-like MARVEL transmembrane domain containing 8 // --- // 5
12766730	0.0031385	0.0392	1.75
12743075	0.003832	0.0431	1.75	PITPNM2	NM_001191383 // PITPNM2 // phosphatidylinositol transfer protein, membrane-associated 2
12839832	0.0050265	0.0494	1.75	LPAR3	NM_001192741 // LPAR3 // lysophosphatidic acid receptor 3 // --- // 532829 /// ENSBTAT0
12675863	0.0076404	0.0605	1.75
12799571	0.008208	0.0628	1.75	SACM1L	NM_001102131 // SACM1L // SAC1 suppressor of actin mutations 1-like (yeast) // --- // 5
12760918	0.01246	0.0784	1.75	TIMP2	NM_174472 // TIMP2 // TIMP metallopeptidase inhibitor 2 // --- // 282093 /// ENSBTAT000
12761479	0.0144943	0.0856	1.75	SLC25A19	NM_001045887 // SLC25A19 // solute carrier family 25 (mitochondrial thiamine pyrophosph
12675365	0.0167478	0.0928	1.75
12675305	0.0006092	0.0209	1.74
12836852	0.0009668	0.0246	1.74	ARHGEF2	NM_001098881 // ARHGEF2 // Rho/Rac guanine nucleotide exchange factor (GEF) 2 // --- //
12914571	0.0010233	0.0249	1.74
12759718	0.0013497	0.0277	1.74
12705205	0.0013963	0.0279	1.74	ABHD1	NM_001035094 // ABHD1 // abhydrolase domain containing 1 // --- // 510774 /// ENSBTAT00
12833133	0.0014396	0.0281	1.74	ARHGAP32	NM_001192087 // ARHGAP32 // Rho GTPase activating protein 32 // --- // 506260 /// ENSBT
12792867	0.0015616	0.0286	1.74	SV2B	NM_001083448 // SV2B // synaptic vesicle glycoprotein 2B // --- // 527014 /// ENSBTAT00
12760443	0.0030738	0.0389	1.74
12755964	0.0031399	0.0392	1.74	UQCRFS1	ENSBTAT00000066053 // UQCRFS1 // ubiquinol-cytochrome c reductase, Rieske iron-sulfur p
12761324	0.0039912	0.044	1.74	SLC35B1	NM_181338 // SLC35B1 // solute carrier family 35, member B1 // --- // 353217 /// ENSBTA
12715236	0.0052336	0.0504	1.74	EPB41L1	XM_003582973 // EPB41L1 // erythrocyte membrane protein band 4.1-like 1 // --- // 51591
12811457	0.0067472	0.0568	1.74	DNASE1	NM_174534 // DNASE1 // deoxyribonuclease I // --- // 282217 /// ENSBTAT00000026784 // D
12806203	0.0171553	0.0938	1.74	GSTA4	NM_001015651 // GSTA4 // glutathione S-transferase alpha 4 // --- // 533917 /// ENSBTAT
12762724	0.0240702	0.113	1.74	LGALS9	NM_001039177 // LGALS9 // lectin, galactoside-binding, soluble, 9 // --- // 510813 ///
12711480	0.0433401	0.156	1.74	DHRS12	NM_001100313 // DHRS12 // dehydrogenase/reductase (SDR family) member 12 // --- // 5072
12836232	0.0004138	0.0197	1.73	LRP8	NM_001097565 // LRP8 // low density lipoprotein receptor-related protein 8, apolipoprot
12756707	0.0005728	0.0206	1.73	MGC139164	ENSBTAT00000010394 // MGC139164 // uncharacterized LOC509649 // --- // 509649 /// NM_00
12823996	0.0007737	0.0225	1.73	CLDN23	XM_592516 // CLDN23 // claudin 23 // --- // 514634 /// ENSBTAT00000009269 // CLDN23 //
12874485	0.0010454	0.0251	1.73	SULT1B1	NM_001075823 // SULT1B1 // sulfotransferase family, cytosolic, 1B, member 1 // --- // 5
12825157	0.0015322	0.0286	1.73	TMEM66	NM_001076856 // TMEM66 // transmembrane protein 66 // --- // 515461 /// ENSBTAT00000018
12720864	0.0018998	0.0311	1.73	PTPLA	XM_866930 // PTPLA // protein tyrosine phosphatase-like (proline instead of catalytic a
12703123	0.002636	0.0361	1.73	GTF3C2	BC149168 // GTF3C2 // general transcription factor IIIC, polypeptide 2, beta 110kDa //
12831992	0.003763	0.0427	1.73	LOC618199	ENSBTAT00000030370 // LOC618199 // peroxisomal biogenesis factor 11 alpha // --- // 618
12865865	0.0038603	0.0433	1.73	TMEM184B	NM_001081522 // TMEM184B // transmembrane protein 184B // --- // 514220 /// ENSBTAT0000
12855916	0.0041992	0.0452	1.73	PODXL	ENSBTAT00000013799 // PODXL // podocalyxin-like // --- // ---
12908277	0.0053904	0.0511	1.73	GDPD2	NM_001034471 // GDPD2 // glycerophosphodiester phosphodiesterase domain containing 2 //
12909914	0.0061654	0.054	1.73	MBNL3	NM_001192740 // MBNL3 // muscleblind-like 3 (Drosophila) // --- // 540550 /// ENSBTAT00
12814788	0.0067919	0.057	1.73	MIR25	NR_030941 // MIR25 // microRNA mir-25 // --- // 791066
12866308	0.0134416	0.0821	1.73	ALDH1L2	NM_001191391 // ALDH1L2 // aldehyde dehydrogenase 1 family, member L2 // --- // 516864
12771254	0.0183561	0.0973	1.73	SLC25A35	NM_001031763 // SLC25A35 // solute carrier family 25, member 35 // --- // 527669 /// EN
12870423	0.0189059	0.0989	1.73	SEC24D	XM_002688058 // SEC24D // SEC24 family, member D (S. cerevisiae) // --- // 504422 /// E
12762928	0.0236034	0.112	1.73	TBC1D16	NM_001206271 // TBC1D16 // TBC1 domain family, member 16 // --- // 512099 /// ENSBTAT00
12713975	0.0481748	0.165	1.73	PKIG	ENSBTAT00000043503 // PKIG // protein kinase (cAMP-dependent, catalytic) inhibitor gamm
12746842	0.0003847	0.0197	1.72	ZNF280A	NM_001192483 // ZNF280A // zinc finger protein 280A // --- // 518200 /// ENSBTAT0000006
12683918	0.0004178	0.0197	1.72	DNAJB11	NM_001034268 // DNAJB11 // DnaJ (Hsp40) homolog, subfamily B, member 11 // --- // 50631
12914683	0.0004197	0.0197	1.72
12741819	0.0006095	0.0209	1.72	NCOR2	XM_003587159 // NCOR2 // nuclear receptor corepressor 2 // --- // 538549 /// ENSBTAT000
12856225	0.0008711	0.0235	1.72	MNX1	XM_002686987 // MNX1 // motor neuron and pancreas homeobox 1 // --- // 789765 /// ENSBT
12868043	0.0009735	0.0247	1.72	MDM2	NM_001099107 // MDM2 // Mdm2, p53 E3 ubiquitin protein ligase homolog (mouse) // --- //
12737608	0.0011655	0.0261	1.72	C16H1orf227	ENSBTAT00000013209 // C16H1orf227 // chromosome 16 open reading frame, human C1orf227 /
12824282	0.0015884	0.0288	1.72	WWC2	XM_611687 // WWC2 // WW and C2 domain containing 2 // --- // 532571 /// ENSBTAT00000016
12679912	0.001696	0.0298	1.72	PDE9A	BC102958 // PDE9A // phosphodiesterase 9A // --- // 511665 /// ENSBTAT00000029195 // PD
12757550	0.0017684	0.0303	1.72	SLC17A7	NM_001098046 // SLC17A7 // solute carrier family 17 (sodium-dependent inorganic phospha
12759536	0.0018861	0.031	1.72	FANCA	NM_001206603 // FANCA // Fanconi anemia, complementation group A // --- // 618375 /// E
12733522	0.002338	0.0342	1.72	APLNR	ENSBTAT00000039541 // APLNR // apelin receptor // --- // 615435 /// NM_001102524 // APL
12702750	0.0028662	0.0375	1.72	TTC7A	NM_001205500 // TTC7A // tetratricopeptide repeat domain 7A // --- // 616640 /// ENSBTA
12872263	0.0036566	0.0422	1.72	STIM2	ENSBTAT00000047170 // STIM2 // stromal interaction molecule 2 // --- // 541299
12692448	0.0049811	0.0493	1.72
12911075	0.0050822	0.0497	1.72
12876527	0.006499	0.0557	1.72	MIR143	NR_030868 // MIR143 // microRNA mir-143 // --- // 100313363
12736354	0.027705	0.122	1.72	SRP9	NM_001115083 // SRP9 // signal recognition particle 9kDa // --- // 527129 /// ENSBTAT00
12708555	0.034013	0.137	1.72	ANKRD57	XM_001253204 // ANKRD57 // ankyrin repeat domain 57 // --- // 785063
12676621	0.0377454	0.144	1.72
12676957	0.0003491	0.0196	1.71
12751450	0.0008289	0.0233	1.71	SIPA1L3	ENSBTAT00000024256 // SIPA1L3 // signal-induced proliferation-associated 1 like 3 // --
12676953	0.0012868	0.0271	1.71
12691915	0.0013762	0.0278	1.71	CORO2B	ENSBTAT00000016845 // CORO2B // coronin, actin binding protein, 2B // --- // 615274
12692366	0.0023888	0.0346	1.71
12829359	0.0028591	0.0375	1.71	CD5	ENSBTAT00000018258 // CD5 // CD5 molecule // --- // 280745 /// NM_173899 // CD5 // CD5
12678153	0.0043376	0.0459	1.71
12799543	0.0063021	0.0546	1.71	SLMAP	ENSBTAT00000061439 // SLMAP // sarcolemma associated protein // --- // --- /// BC149216
12801072	0.0068778	0.0574	1.71	CSH2	NM_181007 // CSH2 // chorionic somatomammotropin hormone 2 // --- // 281097 /// ENSBTAT
12815419	0.0224184	0.109	1.71	COG7	NM_001083372 // COG7 // component of oligomeric golgi complex 7 // --- // 504790 /// BC
12675259	0.0287953	0.125	1.71
12761869	0.0003722	0.0197	1.7	UNC13D	NM_001192083 // UNC13D // unc-13 homolog D (C. elegans) // --- // 506146 /// ENSBTAT000
12782736	0.000472	0.0198	1.7	SDPR	BC118101 // SDPR // serum deprivation response // --- // 532333
12778619	0.0010165	0.0249	1.7	NR4A2	NM_001076208 // NR4A2 // nuclear receptor subfamily 4, group A, member 2 // --- // 5402
12713415	0.0010574	0.0252	1.7	MIR2305	NR_031117 // MIR2305 // microRNA mir-2305 // --- // 100313127
12754460	0.0011494	0.0259	1.7	CMIP	XM_002694739 // CMIP // c-Maf inducing protein // --- // 782414 /// XM_001251051 // CMI
12675307	0.0015703	0.0287	1.7
12754788	0.0025981	0.0359	1.7
12889132	0.0026587	0.0363	1.7	OSTF1	NM_174409 // OSTF1 // osteoclast stimulating factor 1 // --- // 281961 /// ENSBTAT00000
12746343	0.0032882	0.0402	1.7	GTF2H3	NM_001079589 // GTF2H3 // general transcription factor IIH, polypeptide 3, 34kDa // ---
12700783	0.0034657	0.0411	1.7	RASGRP3	NM_001075848 // RASGRP3 // RAS guanyl releasing protein 3 (calcium and DAG-regulated) /
12832520	0.0051437	0.05	1.7	LOC100336475	XM_002699029 // LOC100336475 // putative PRAME family member 24-like // --- // 10033647
12911071	0.0057162	0.0523	1.7
12862214	0.0066286	0.0564	1.7	NDUFA4L2	NM_001113305 // NDUFA4L2 // NADH dehydrogenase (ubiquinone) 1 alpha subcomplex, 4-like
12707266	0.0086897	0.0647	1.7	PRKD3	NM_001205538 // PRKD3 // protein kinase D3 // --- // 538447 /// ENSBTAT00000001474 // P
12720047	0.0089711	0.0657	1.7	SLC13A3	NM_001080288 // SLC13A3 // solute carrier family 13 (sodium-dependent dicarboxylate tra
12795525	0.0093824	0.0671	1.7	RAD18	NM_001035295 // RAD18 // RAD18 homolog (S. cerevisiae) // --- // 514440 /// ENSBTAT0000
12763389	0.0164865	0.0921	1.7	CYB5D2	XM_593364 // CYB5D2 // cytochrome b5 domain containing 2 // --- // 515356 /// ENSBTAT00
12734981	0.0167653	0.0929	1.7	DYRK3	NM_001100298 // DYRK3 // dual-specificity tyrosine-(Y)-phosphorylation regulated kinase
12784956	0.025161	0.116	1.7	CCNO	XM_003585112 // CCNO // cyclin O // --- // 100301247 /// ENSBTAT00000066316 // CCNO //
12818560	0.0288736	0.125	1.7	DEXI	NM_001191169 // DEXI // Dexi homolog (mouse) // --- // 782581 /// ENSBTAT00000063079 //
12791659	0.0003693	0.0197	1.69	GPR68	ENSBTAT00000008858 // GPR68 // G protein-coupled receptor 68 // --- // 281799 /// NM_17
12675327	0.0003846	0.0197	1.69
12802930	0.0004082	0.0197	1.69	TMEM63B	NM_001163939 // TMEM63B // transmembrane protein 63B // --- // 534891 /// ENSBTAT000000
12781604	0.0004677	0.0198	1.69	OTUD3	ENSBTAT00000065082 // OTUD3 // OTU domain containing 3 // --- // 514809 /// ENSBTAT0000
12892272	0.0009375	0.0244	1.69	MIR27B	NR_030910 // MIR27B // microRNA mir-27b // --- // 791000
12766174	0.0010186	0.0249	1.69	TTC25	NM_001103308 // TTC25 // tetratricopeptide repeat domain 25 // --- // 788831 /// ENSBTA
12898656	0.0010469	0.0251	1.69	SEC63	NM_001192815 // SEC63 // SEC63 homolog (S. cerevisiae) // --- // 541040 /// ENSBTAT0000
12912273	0.0020205	0.0319	1.69
12704003	0.002182	0.0332	1.69	MGAT4A	NM_177520 // MGAT4A // mannosyl (alpha-1,3-)-glycoprotein beta-1,4-N-acetylglucosaminyl
12870918	0.0028932	0.0377	1.69	TMEM175	NM_001075613 // TMEM175 // transmembrane protein 175 // --- // 513317 /// ENSBTAT000000
12796909	0.003449	0.0411	1.69	SELK	NM_001037489 // SELK // selenoprotein K // --- // 615114 /// ENSBTAT00000045935 // SELK
12676391	0.0057316	0.0524	1.69
12703373	0.0058225	0.0527	1.69	C2orf28	ENSBTAT00000044161 // C2orf28 // chromosome 2 open reading frame 28 // --- // ---
12713277	0.0059299	0.0531	1.69
12789614	0.0062018	0.0541	1.69	FAH	NM_001098912 // FAH // fumarylacetoacetate hydrolase (fumarylacetoacetase) // --- // 50
12731246	0.0062971	0.0546	1.69	RRM1	NM_001113296 // RRM1 // ribonucleotide reductase M1 // --- // 505537 /// ENSBTAT0000001
12801746	0.0068378	0.0572	1.69	GCLC	NM_001083674 // GCLC // glutamate-cysteine ligase, catalytic subunit // --- // 512468 /
12718369	0.0081215	0.0625	1.69	OSBPL2	ENSBTAT00000023135 // OSBPL2 // oxysterol binding protein-like 2 // --- // 505328 /// N
12728718	0.00975	0.0687	1.69	DTX4	ENSBTAT00000005289 // DTX4 // deltex homolog 4 (Drosophila) // --- // ---
12914043	0.0101471	0.0702	1.69
12828233	0.0107332	0.0724	1.69	SPOCK2	NM_001101115 // SPOCK2 // sparc/osteonectin, cwcv and kazal-like domains proteoglycan (
12727106	0.0227841	0.11	1.69	BTBD10	NM_001075230 // BTBD10 // BTB (POZ) domain containing 10 // --- // 505888 /// ENSBTAT00
12852904	0.0239636	0.113	1.69	CAV1	NM_174004 // CAV1 // caveolin 1, caveolae protein, 22kDa // --- // 281040 /// ENSBTAT00
12677237	0.0378643	0.145	1.69
12760237	0.0005649	0.0206	1.68	KSR1	ENSBTAT00000008672 // KSR1 // kinase suppressor of ras 1 // --- // --- /// XM_001788749
12852732	0.0006803	0.0217	1.68	MIR2420	NR_031198 // MIR2420 // microRNA mir-2420 // --- // 100313205
12730259	0.0006863	0.0218	1.68	TSPAN18	ENSBTAT00000028636 // TSPAN18 // tetraspanin 18 // --- // 783765
12807586	0.000788	0.0227	1.68	RPRD1A	NM_001075156 // RPRD1A // regulation of nuclear pre-mRNA domain containing 1A // --- //
12851025	0.0008177	0.0231	1.68	BPGM	NM_001035402 // BPGM // 2,3-bisphosphoglycerate mutase // 4q32-q33 // 533785 /// BC1026
12732436	0.0009511	0.0245	1.68	B7H6	NM_001206792 // B7H6 // B7 homolog 6 // --- // 523303
12717616	0.0012264	0.0265	1.68	FASTKD5	NM_001206420 // FASTKD5 // FAST kinase domains 5 // --- // 788680
12913151	0.0014555	0.0282	1.68
12681711	0.0015796	0.0288	1.68	RBP1	NM_001025343 // RBP1 // retinol binding protein 1, cellular // --- // 537379 /// AF5022
12844800	0.0017589	0.0302	1.68	WDR3	NM_001192388 // WDR3 // WD repeat domain 3 // --- // 514870 /// ENSBTAT00000026561 // W
12812144	0.0018402	0.0307	1.68	WBSCR27	ENSBTAT00000026552 // WBSCR27 // Williams Beuren syndrome chromosome region 27 // --- /
12768639	0.0018446	0.0307	1.68	ZZEF1	NM_001206129 // ZZEF1 // zinc finger, ZZ-type with EF-hand domain 1 // --- // 508144 //
12844420	0.0019621	0.0315	1.68	STXBP3	NM_001083415 // STXBP3 // syntaxin binding protein 3 // --- // 512490 /// ENSBTAT000000
12876473	0.0019964	0.0318	1.68
12804225	0.002304	0.0341	1.68
12794262	0.0026259	0.0361	1.68
12797434	0.0031303	0.0392	1.68	DCP1A	NM_001102330 // DCP1A // DCP1 decapping enzyme homolog A (S. cerevisiae) // --- // 7832
12722776	0.0031343	0.0392	1.68	LOC523023	XM_601315 // LOC523023 // testis-specific serine/threonine-protein kinase 5-like // ---
12754491	0.0031682	0.0394	1.68	NLRC5	ENSBTAT00000007129 // NLRC5 // NLR family, CARD domain containing 5 // --- // --- /// X
12832883	0.0113333	0.0746	1.68	PAG19	NM_176628 // PAG19 // pregnancy-associated glycoprotein 19 // --- // 337913 /// AF19233
12883164	0.0146448	0.0861	1.68	CLTB	NM_174277 // CLTB // clathrin, light chain B // --- // 281698 /// ENSBTAT00000014218 //
12879151	0.0172827	0.0941	1.68	RMND5B	NM_001075706 // RMND5B // required for meiotic nuclear division 5 homolog B (S. cerevis
12719938	0.0352103	0.139	1.68	SAMHD1	NM_001075861 // SAMHD1 // SAM domain and HD domain 1 // --- // 524683 /// ENSBTAT000000
12724640	0.0369309	0.143	1.68	OSR2	NM_001034328 // OSR2 // odd-skipped related 2 (Drosophila) // --- // 508692 /// ENSBTAT
12843987	0.0004735	0.0198	1.67	PALMD	ENSBTAT00000023485 // PALMD // palmdelphin // --- // 509823 /// NM_001035079 // PALMD /
12893924	0.000551	0.0206	1.67	CTNNAL1	NM_001191534 // CTNNAL1 // catenin (cadherin-associated protein), alpha-like 1 // --- /
12774837	0.0005614	0.0206	1.67	NDUFB3	NM_176667 // NDUFB3 // NADH dehydrogenase (ubiquinone) 1 beta subcomplex, 3, 12kDa // -
12811348	0.0005708	0.0206	1.67	ABCC1	NM_174223 // ABCC1 // ATP-binding cassette, sub-family C (CFTR/MRP), member 1 // --- //
12676387	0.0008852	0.0238	1.67
12914659	0.0012096	0.0264	1.67
12914803	0.0012325	0.0265	1.67
12727918	0.0022946	0.034	1.67	ARFIP2	NM_001034477 // ARFIP2 // ADP-ribosylation factor interacting protein 2 // --- // 51493
12852991	0.0024608	0.0351	1.67	PON2	NM_001013588 // PON2 // paraoxonase 2 // --- // 281417 /// ENSBTAT00000011009 // PON2 /
12869106	0.0031599	0.0393	1.67	MON2	XM_001250858 // MON2 // MON2 homolog (S. cerevisiae) // --- // 782635 /// ENSBTAT000000
12788612	0.0033686	0.0406	1.67	SCFD1	NM_001191365 // SCFD1 // sec1 family domain containing 1 // --- // 100140328 /// ENSBTA
12914991	0.004149	0.0449	1.67
12790049	0.0049097	0.0488	1.67	SNUPN	NM_001038546 // SNUPN // snurportin 1 // --- // 515588 /// ENSBTAT00000028371 // SNUPN
12675351	0.0055234	0.0515	1.67
12681770	0.0055656	0.0517	1.67	ZMAT3	ENSBTAT00000016535 // ZMAT3 // zinc finger, matrin-type 3 // --- // 538512 /// NM_00107
12837217	0.0057303	0.0524	1.67	MED8	XM_002686438 // MED8 // mediator complex subunit 8 // --- // 507623 /// ENSBTAT00000022
12680034	0.0064525	0.0554	1.67	ADAMTS1	NM_001101080 // ADAMTS1 // ADAM metallopeptidase with thrombospondin type 1 motif, 1 //
12676929	0.0067183	0.0567	1.67
12745233	0.0101172	0.0701	1.67	MIR1721	NR_030872 // MIR1721 // microRNA mir-1721 // --- // 100313411
12816240	0.0125578	0.0788	1.67	ROGDI	NM_001075452 // ROGDI // rogdi homolog (Drosophila) // --- // 510492 /// ENSBTAT0000002
12689684	0.0182659	0.0971	1.67	DLL4	NM_001075779 // DLL4 // delta-like 4 (Drosophila) // --- // 518746 /// ENSBTAT000000136
12841481	0.0004214	0.0197	1.66	ZMYM6	NM_001206292 // ZMYM6 // zinc finger, MYM-type 6 // --- // 618234 /// ENSBTAT0000002926
12742542	0.0004723	0.0198	1.66
12753221	0.0004874	0.0198	1.66	KIAA0182	XM_580781 // KIAA0182 // KIAA0182 ortholog // --- // 538506 /// ENSBTAT00000013088 // K
12699761	0.0004915	0.0199	1.66	MALL	NM_001046115 // MALL // mal, T-cell differentiation protein-like // --- // 512289 /// E
12732137	0.0006235	0.0211	1.66	PCSK7	NM_001192978 // PCSK7 // proprotein convertase subtilisin/kexin type 7 // --- // 515398
12853145	0.0008634	0.0235	1.66	AQP1	NM_174702 // AQP1 // aquaporin 1 (Colton blood group) // --- // 282653 /// ENSBTAT00000
12908589	0.0010262	0.0249	1.66	SHROOM4	ENSBTAT00000003899 // SHROOM4 // shroom family member 4 // --- // 519045
12677225	0.0017108	0.0299	1.66
12742026	0.0017282	0.03	1.66	SCARB1	NM_174597 // SCARB1 // scavenger receptor class B, member 1 // --- // 282346 /// ENSBTA
12850105	0.0018019	0.0305	1.66	CPA4	ENSBTAT00000066192 // CPA4 // carboxypeptidase A4 // --- // ---
12896970	0.001813	0.0306	1.66	TNFAIP3	NM_001192170 // TNFAIP3 // tumor necrosis factor, alpha-induced protein 3 // --- // 508
12858844	0.0023448	0.0343	1.66	LOC510193	NM_001100333 // LOC510193 // apolipoprotein L, 3-like // --- // 510193 /// ENSBTAT00000
12677007	0.0026057	0.036	1.66
12899993	0.002715	0.0365	1.66	LMBRD1	ENSBTAT00000021518 // LMBRD1 // LMBR1 domain containing 1 // --- // 510495 /// NM_00103
12837680	0.0027986	0.0371	1.66	ARHGEF11	ENSBTAT00000064318 // ARHGEF11 // Rho guanine nucleotide exchange factor (GEF) 11 // --
12784276	0.0033822	0.0407	1.66	SLC35F5	NM_001101242 // SLC35F5 // solute carrier family 35, member F5 // --- // 615480 /// ENS
12745062	0.00382	0.043	1.66	USP30	NM_001191361 // USP30 // ubiquitin specific peptidase 30 // --- // 100140210 /// ENSBTA
12865807	0.0044412	0.0464	1.66	KRR1	ENSBTAT00000015401 // KRR1 // KRR1, small subunit (SSU) processome component, homolog (
12709957	0.0045291	0.0468	1.66	RNF6	NM_001098062 // RNF6 // ring finger protein (C3H2C3 type) 6 // --- // 527056 /// ENSBTA
12903951	0.0047149	0.0478	1.66	APOO	NM_001075639 // APOO // apolipoprotein O // --- // 513847 /// ENSBTAT00000014525 // APO
12762270	0.0054512	0.0514	1.66	ACAP1	NM_001103234 // ACAP1 // ArfGAP with coiled-coil, ankyrin repeat and PH domains 1 // --
12676617	0.007676	0.0607	1.66
12680157	0.0086371	0.0645	1.66	PLCH1	ENSBTAT00000065611 // PLCH1 // phospholipase C, eta 1 // --- // 513565 /// ENSBTAT00000
12789688	0.0169272	0.0932	1.66	GOLGA5	NM_001098007 // GOLGA5 // golgin A5 // --- // 510412 /// ENSBTAT00000006036 // GOLGA5 /
12677839	0.0259444	0.118	1.66
12912899	0.0312246	0.131	1.66
12694567	0.0312545	0.131	1.66	SFXN1	NM_001015574 // SFXN1 // sideroflexin 1 // --- // 511375 /// ENSBTAT00000019322 // SFXN
12719676	0.0451862	0.159	1.66	SLC17A9	NM_001100378 // SLC17A9 // solute carrier family 17, member 9 // --- // 518062 /// ENSB
12682216	0.00053	0.0205	1.65	BTG3	NM_001034722 // BTG3 // BTG family, member 3 // --- // 541054 /// ENSBTAT00000024895 //
12735269	0.0005953	0.0209	1.65	ELF3	ENSBTAT00000011536 // ELF3 // E74-like factor 3 (ets domain transcription factor, epith
12713219	0.0005996	0.0209	1.65	LOC100140857	XM_002692317 // LOC100140857 // uncharacterized LOC100140857 // --- // 100140857
12797578	0.0010475	0.0251	1.65
12764915	0.0013704	0.0278	1.65	GGNBP2	NM_001206122 // GGNBP2 // gametogenetin binding protein 2 // --- // 539076 /// ENSBTAT0
12870577	0.0016194	0.0291	1.65
12809866	0.0021267	0.0327	1.65	LOC522631	XM_003583977 // LOC522631 // piezo-type mechanosensitive ion channel component 2-like /
12679896	0.0022968	0.034	1.65	CHAF1B	NM_001098014 // CHAF1B // chromatin assembly factor 1, subunit B (p60) // --- // 511654
12676359	0.0025618	0.0358	1.65
12757957	0.0029265	0.0379	1.65	SHCBP1	NM_001192579 // SHCBP1 // SHC SH2-domain binding protein 1 // --- // 523367 /// ENSBTAT
12788643	0.0036859	0.0424	1.65	SERPINA3	ENSBTAT00000009264 // SERPINA3 // serpin peptidase inhibitor, clade A (alpha-1 antiprot
12837383	0.003851	0.0432	1.65	CCBL2	NM_001075370 // CCBL2 // cysteine conjugate-beta lyase 2 // --- // 508712 /// BC120067
12676393	0.0051312	0.0499	1.65
12676935	0.006159	0.054	1.65
12693202	0.0068747	0.0574	1.65
12773300	0.0088843	0.0654	1.65
12805118	0.011166	0.0739	1.65	PPIL1	NM_001014869 // PPIL1 // peptidylprolyl isomerase (cyclophilin)-like 1 // --- // 508179
12845080	0.0142616	0.0847	1.65	LRRC8B	XM_595756 // LRRC8B // leucine rich repeat containing 8 family, member B // --- // 5175
12674689	0.0206743	0.104	1.65
12761434	0.0287063	0.125	1.65	RAMP2	NM_001098860 // RAMP2 // receptor (G protein-coupled) activity modifying protein 2 // -
12825608	0.039191	0.148	1.65	MFHAS1	ENSBTAT00000021162 // MFHAS1 // malignant fibrous histiocytoma amplified sequence 1 //
12700322	0.0005692	0.0206	1.64	DQX1	NM_001035322 // DQX1 // DEAQ box RNA-dependent ATPase 1 // --- // 517947 /// ENSBTAT000
12760926	0.0005943	0.0209	1.64	ACADVL	NM_174494 // ACADVL // acyl-CoA dehydrogenase, very long chain // --- // 282130 /// ENS
12730938	0.0009789	0.0247	1.64	HYOU1	NM_001206910 // HYOU1 // hypoxia up-regulated 1 // --- // 282295 /// NM_001206911 // HY
12872344	0.0010707	0.0253	1.64	TMEM33	BC114131 // TMEM33 // transmembrane protein 33 // --- // 614879 /// XM_003585271 // TME
12684457	0.0010817	0.0253	1.64	HACL1	NM_001098949 // HACL1 // 2-hydroxyacyl-CoA lyase 1 // --- // 512676 /// ENSBTAT00000004
12808295	0.0013581	0.0278	1.64	WDR7	NM_001206098 // WDR7 // WD repeat domain 7 // --- // 536469 /// ENSBTAT00000005230 // W
12800549	0.0013767	0.0278	1.64
12792315	0.0014057	0.028	1.64	PPP1R13B	XM_002696847 // PPP1R13B // protein phosphatase 1, regulatory subunit 13B // --- // 511
12824834	0.0016258	0.0292	1.64	VEGFC	NM_174488 // VEGFC // vascular endothelial growth factor C // --- // 282122 /// ENSBTAT
12901327	0.0019049	0.0311	1.64
12816544	0.0028007	0.0371	1.64	LOC513111	NM_001098021 // LOC513111 // transmembrane protein 225-like // --- // 513111 /// ENSBTA
12739399	0.003019	0.0386	1.64	ENAH	ENSBTAT00000021544 // ENAH // enabled homolog (Drosophila) // --- // ---
12675265	0.0058868	0.0529	1.64
12906177	0.0062002	0.0541	1.64	ERI1	ENSBTAT00000064195 // ERI1 // exoribonuclease 1 // --- // 785868
12771793	0.0064884	0.0556	1.64	SNX11	NM_001076904 // SNX11 // sorting nexin 11 // --- // 534567 /// ENSBTAT00000027082 // SN
12905830	0.0098058	0.069	1.64	NSDHL	NM_001035482 // NSDHL // NAD(P) dependent steroid dehydrogenase-like // --- // 616694 /
12722624	0.0108965	0.0728	1.64	PREX2	NM_001192526 // PREX2 // phosphatidylinositol-3,4,5-trisphosphate-dependent Rac exchang
12726238	0.011328	0.0746	1.64	LOC782385	XM_002692707 // LOC782385 // uncharacterized LOC782385 // --- // 782385 /// ENSBTAT0000
12892432	0.0116124	0.0756	1.64
12903372	0.0118101	0.0762	1.64	PRKX	ENSBTAT00000066094 // PRKX // protein kinase, X-linked // --- // 505773
12890164	0.0118932	0.0765	1.64	PDLIM2	NM_001034430 // PDLIM2 // PDZ and LIM domain 2 (mystique) // --- // 512907 /// ENSBTAT0
12674657	0.0125423	0.0787	1.64
12675777	0.0130706	0.0808	1.64
12762386	0.0158987	0.0901	1.64	SHMT1	NM_001015553 // SHMT1 // serine hydroxymethyltransferase 1 (soluble) // --- // 509002 /
12675873	0.0176992	0.0953	1.64
12690195	0.0207065	0.104	1.64	DHRS1	NM_001046294 // DHRS1 // dehydrogenase/reductase (SDR family) member 1 // --- // 528832
12847346	0.0334305	0.135	1.64	TMEM56	ENSBTAT00000064490 // TMEM56 // transmembrane protein 56 // --- // --- /// ENSBTAT00000
12675261	0.034684	0.138	1.64
12674687	0.0355529	0.14	1.64
12868120	0.0005213	0.0204	1.63	ETNK1	XM_002687736 // ETNK1 // ethanolamine kinase 1 // --- // 540705 /// ENSBTAT00000007669
12789851	0.0007308	0.0222	1.63	SNRPA1	NM_001098948 // SNRPA1 // small nuclear ribonucleoprotein polypeptide A' // --- // 5125
12691467	0.0009298	0.0242	1.63	RHOJ	NM_001083498 // RHOJ // ras homolog gene family, member J // --- // 540619 /// ENSBTAT0
12751220	0.0010354	0.025	1.63	PPP1R12C	BC122585 // PPP1R12C // protein phosphatase 1, regulatory subunit 12C // --- // 512431
12846568	0.0011933	0.0263	1.63	CACHD1	XM_616138 // CACHD1 // cache domain containing 1 // --- // 536020 /// ENSBTAT0000002187
12818863	0.0011983	0.0263	1.63
12726520	0.0012224	0.0265	1.63	LOC100337015	ENSBTAT00000028453 // LOC100337015 // Rho guanine nucleotide exchange factor (GEF) 12-l
12793921	0.0015648	0.0287	1.63	LOC782953	ENSBTAT00000031184 // LOC782953 // 60S ribosomal protein L30 pseudogene // --- // 78295
12676695	0.0016906	0.0297	1.63
12799813	0.0020939	0.0324	1.63	RBM5	NM_001046374 // RBM5 // RNA binding motif protein 5 // --- // 534216 /// ENSBTAT0000000
12709963	0.002335	0.0342	1.63	MBNL2	NM_001099710 // MBNL2 // muscleblind-like 2 (Drosophila) // --- // 527679 /// ENSBTAT00
12704585	0.002562	0.0358	1.63	MAP4K3	NM_001191162 // MAP4K3 // mitogen-activated protein kinase kinase kinase kinase 3 // --
12725276	0.0030509	0.0388	1.63	HEATR7A	NM_001102018 // HEATR7A // HEAT repeat containing 7A // --- // 515055 /// ENSBTAT000000
12791439	0.0040527	0.0444	1.63	MIR342	NR_030973 // MIR342 // microRNA mir-342 // --- // 791058
12891949	0.0043427	0.0459	1.63	LOC617112	XM_869303 // LOC617112 // interferon, omega 1-like // --- // 617112 /// ENSBTAT00000063
12893075	0.0051679	0.0501	1.63	BIN3	NM_001075299 // BIN3 // bridging integrator 3 // --- // 507115 /// ENSBTAT00000007195 /
12791280	0.0055019	0.0514	1.63	PRC1	NM_001076543 // PRC1 // protein regulator of cytokinesis 1 // --- // 767818 /// ENSBTAT
12674681	0.0059052	0.053	1.63
12707471	0.0064271	0.0552	1.63	GCC2	NM_001192259 // GCC2 // GRIP and coiled-coil domain containing 2 // --- // 539484 /// E
12796519	0.007228	0.0587	1.63	ADAMTS9	NM_001206573 // ADAMTS9 // ADAM metallopeptidase with thrombospondin type 1 motif, 9 //
12833369	0.0155269	0.0889	1.63	MGC139603	ENSBTAT00000050603 // MGC139603 // uncharacterized LOC509055 // --- // 509055 /// NM_00
12724305	0.0160117	0.0905	1.63	TTPA	NM_001206676 // TTPA // tocopherol (alpha) transfer protein // --- // 286813 /// ENSBTA
12820137	0.0162568	0.0914	1.63	CASP7	XM_604643 // CASP7 // caspase 7, apoptosis-related cysteine peptidase // --- // 526279
12756992	0.0218063	0.107	1.63	SLC7A6OS	NM_001075567 // SLC7A6OS // solute carrier family 7, member 6 opposite strand // --- //
12891053	0.0220345	0.108	1.63	PPP3CC	NM_001098076 // PPP3CC // protein phosphatase 3, catalytic subunit, gamma isozyme // --
12889169	0.0235525	0.112	1.63	TGFBR1	ENSBTAT00000024010 // TGFBR1 // transforming growth factor, beta receptor 1 // --- // 2
12678089	0.0449095	0.159	1.63
12813899	0.0008367	0.0233	1.62	ZFAND2A	NM_001083762 // ZFAND2A // zinc finger, AN1-type domain 2A // --- // 613974 /// ENSBTAT
12881035	0.0010068	0.0249	1.62	PRR7	NM_001192059 // PRR7 // proline rich 7 (synaptic) // --- // 538641 /// ENSBTAT000000151
12822732	0.0011445	0.0259	1.62	LOC534506	ENSBTAT00000004287 // LOC534506 // carbohydrate sulfotransferase 15-like // --- // 5345
12789892	0.0015165	0.0285	1.62	RCN2	NM_001075579 // RCN2 // reticulocalbin 2, EF-hand calcium binding domain // --- // 5127
12717111	0.0015238	0.0285	1.62	SDCBP2	ENSBTAT00000039310 // SDCBP2 // syntenin-2-like // --- // 617742
12910686	0.0015789	0.0288	1.62
12708454	0.0015868	0.0288	1.62	IER5L	NM_001206835 // IER5L // immediate early response 5-like // --- // 782019
12819256	0.0017429	0.0301	1.62	PDCD4	NM_001083647 // PDCD4 // programmed cell death 4 (neoplastic transformation inhibitor)
12676961	0.0019617	0.0315	1.62
12696439	0.0024305	0.0348	1.62	MAP3K9	NM_001206852 // MAP3K9 // mitogen-activated protein kinase kinase kinase 9 // --- // 53
12914755	0.0025361	0.0357	1.62
12791542	0.0044134	0.0462	1.62	BTBD7	XM_002696820 // BTBD7 // BTB (POZ) domain containing 7 // --- // 100300409 /// ENSBTAT0
12872256	0.0053602	0.051	1.62	DKK2	NM_001082615 // DKK2 // dickkopf homolog 2 (Xenopus laevis) // --- // 541161 /// ENSBTA
12796005	0.007333	0.0593	1.62	SLC22A14	XM_002696915 // SLC22A14 // solute carrier family 22, member 14 // --- // 522718 /// EN
12914405	0.0075524	0.0602	1.62
12721343	0.009241	0.0667	1.62	LOC787809	XM_001255069 // LOC787809 // zinc finger protein 64 homolog (mouse)-like // --- // 7878
12675321	0.010647	0.0721	1.62
12678087	0.0134843	0.0822	1.62
12705249	0.0227222	0.109	1.62	C11H2orf50	NM_001075480 // C11H2orf50 // chromosome 11 open reading frame, human C2orf50 // --- //
12881344	0.0247648	0.115	1.62	TUBB4A	NM_001034697 // TUBB4A // tubulin, beta 4A class IVa // --- // 540236 /// ENSBTAT000000
12723104	0.0283442	0.124	1.62	STK3	NM_001079607 // STK3 // serine/threonine kinase 3 // --- // 533815 /// ENSBTAT000000372
12674663	0.0434024	0.156	1.62
12908826	0.0452392	0.159	1.62	MOSPD1	NM_001038137 // MOSPD1 // motile sperm domain containing 1 // --- // 523578 /// ENSBTAT
12747938	0.0006579	0.0215	1.61	PITPNB	NM_001078040 // PITPNB // phosphatidylinositol transfer protein, beta // --- // 613773
12678155	0.0012983	0.0272	1.61
12890943	0.0013851	0.0278	1.61	UNC13B	NM_001193239 // UNC13B // unc-13 homolog B (C. elegans) // --- // 530692 /// ENSBTAT000
12706257	0.0015103	0.0285	1.61	STARD7	NM_001102086 // STARD7 // StAR-related lipid transfer (START) domain containing 7 // --
12819668	0.0016384	0.0292	1.61	ZFYVE27	NM_001017939 // ZFYVE27 // zinc finger, FYVE domain containing 27 // --- // 514383 ///
12725874	0.0016728	0.0296	1.61	E2F5	HQ011403 // E2F5 // E2F transcription factor 5, p130-binding // --- // 539427 /// XM_00
12699554	0.0024409	0.0348	1.61	ZBTB43	ENSBTAT00000004465 // ZBTB43 // zinc finger and BTB domain containing 43 // --- // 5094
12675311	0.0026666	0.0363	1.61
12779168	0.0027295	0.0366	1.61	BIN1	NM_001046541 // BIN1 // bridging integrator 1 // --- // 614576 /// ENSBTAT00000025522 /
12845899	0.0027962	0.0371	1.61	ATF6	ENSBTAT00000061155 // ATF6 // activating transcription factor 6 // --- // ---
12828038	0.0034116	0.0409	1.61	MMRN2	XM_589798 // MMRN2 // multimerin 2 // --- // 512308 /// ENSBTAT00000004563 // MMRN2 //
12674645	0.0034669	0.0411	1.61
12882508	0.003592	0.0419	1.61	RAPGEF6	XM_001787259 // RAPGEF6 // Rap guanine nucleotide exchange factor (GEF) 6 // --- // 789
12781903	0.00374	0.0427	1.61	PIGV	NM_001192505 // PIGV // phosphatidylinositol glycan anchor biosynthesis, class V // ---
12713650	0.0052238	0.0503	1.61	PLCB4	NM_001166510 // PLCB4 // phospholipase C, beta 4 // --- // 281985 /// ENSBTAT0000001744
12851128	0.0052661	0.0505	1.61	KLHL7	ENSBTAT00000021310 // KLHL7 // kelch-like 7 (Drosophila) // --- // 534697 /// NM_001076
12686791	0.0052916	0.0506	1.61	TMEM39A	NM_001076360 // TMEM39A // transmembrane protein 39A // --- // 615128 /// ENSBTAT000000
12812019	0.0060997	0.0539	1.61	NDE1	ENSBTAT00000021265 // NDE1 // nudE nuclear distribution gene E homolog 1 (A. nidulans)
12797945	0.007852	0.0613	1.61	DAG1	ENSBTAT00000015385 // DAG1 // dystroglycan 1 (dystrophin-associated glycoprotein 1) //
12676229	0.0082475	0.063	1.61
12703545	0.0086817	0.0647	1.61	FEZ2	NM_001193050 // FEZ2 // fasciculation and elongation protein zeta 2 (zygin II) // --- /
12855122	0.0087987	0.065	1.61	TES	NM_001046390 // TES // testis derived transcript (3 LIM domains) // --- // 534965 /// E
12852910	0.0090217	0.0659	1.61	CD36	NM_174010 // CD36 // CD36 molecule (thrombospondin receptor) // --- // 281052 /// ENSBT
12760460	0.0099626	0.0695	1.61
12816530	0.011694	0.0758	1.61	CHST12	NM_001077913 // CHST12 // carbohydrate (chondroitin 4) sulfotransferase 12 // --- // 51
12773057	0.0173392	0.0943	1.61	NARF	NM_001102318 // NARF // nuclear prelamin A recognition factor // --- // 618340 /// ENSB
12891185	0.0234486	0.111	1.61	GSN	ENSBTAT00000053931 // GSN // gelsolin // --- // 535077 /// NM_001034627 // GSN // gelso
12675877	0.0464061	0.162	1.61
12827149	0.0464441	0.162	1.61	C1orf198	ENSBTAT00000031377 // C1orf198 // chromosome 1 open reading frame 198 // --- // ---
12789930	0.000651	0.0215	1.6	CTAGE5	NM_001075599 // CTAGE5 // CTAGE family, member 5 // --- // 513132 /// ENSBTAT0000004567
12712681	0.0007274	0.0221	1.6	ZC3H13	BC120093 // ZC3H13 // zinc finger CCCH-type containing 13 // --- // 540735 /// ENSBTAT0
12742795	0.0010797	0.0253	1.6	HPD	NM_001015611 // HPD // 4-hydroxyphenylpyruvate dioxygenase // --- // 516058 /// ENSBTAT
12853555	0.0011337	0.0257	1.6	SLC37A3	ENSBTAT00000033491 // SLC37A3 // solute carrier family 37 (glycerol-3-phosphate transpo
12765330	0.001263	0.0269	1.6	WSB1	ENSBTAT00000006593 // WSB1 // WD repeat and SOCS box containing 1 // --- // 614851
12914485	0.0012755	0.027	1.6
12875155	0.0014779	0.0283	1.6	PAQR3	NM_001206068 // PAQR3 // progestin and adipoQ receptor family member III // --- // 5348
12674647	0.002262	0.0339	1.6
12770881	0.0025477	0.0358	1.6	MYO18A	XM_003587388 // MYO18A // myosin XVIIIA // --- // 519634 /// ENSBTAT00000023111 // MYO1
12705793	0.0026093	0.036	1.6	TCF7L1	XM_593301 // TCF7L1 // transcription factor 7-like 1 (T-cell specific, HMG-box) // ---
12791782	0.0048937	0.0487	1.6	NDUFB1	NM_175809 // NDUFB1 // NADH dehydrogenase (ubiquinone) 1 beta subcomplex, 1, 7kDa // --
12728955	0.0051342	0.0499	1.6
12828419	0.0054541	0.0514	1.6	CCSAP	ENSBTAT00000064890 // CCSAP // centriole, cilia and spindle-associated protein // --- /
12801926	0.0068958	0.0574	1.6	NCR3	NM_001040524 // NCR3 // natural cytotoxicity triggering receptor 3 // --- // 513769 ///
12886412	0.0069475	0.0577	1.6	RNF44	NM_001192713 // RNF44 // ring finger protein 44 // --- // 531968 /// ENSBTAT00000023598
12886975	0.0078351	0.0613	1.6	AGXT2L2	NM_001192899 // AGXT2L2 // alanine-glyoxylate aminotransferase 2-like 2 // --- // 53724
12763349	0.0079114	0.0616	1.6
12783710	0.0079511	0.0618	1.6	TANK	NM_001192264 // TANK // TRAF family member-associated NFKB activator // --- // 539513 /
12680337	0.0089531	0.0657	1.6	DOPEY2	XM_002685151 // DOPEY2 // dopey family member 2 // --- // 514520 /// ENSBTAT00000019018
12827925	0.0101622	0.0702	1.6	LOC508976	XR_084103 // LOC508976 // uncharacterized LOC508976 // --- // 508976
12796646	0.0101723	0.0703	1.6	TMEM110	NM_001076117 // TMEM110 // transmembrane protein 110 // --- // 538654 /// ENSBTAT000000
12743185	0.0105667	0.0719	1.6	RNF185	NM_001083703 // RNF185 // ring finger protein 185 // --- // 524459 /// ENSBTAT000000036
12780258	0.0149049	0.0871	1.6	EPB41	NM_174311 // EPB41 // erythrocyte membrane protein band 4.1 (elliptocytosis 1, RH-linke
12789322	0.0163869	0.0918	1.6	PTPN9	NM_001192054 // PTPN9 // protein tyrosine phosphatase, non-receptor type 9 // --- // 50
12677799	0.0178184	0.0957	1.6
12793059	0.0185812	0.0979	1.6	SNX6	NM_001046331 // SNX6 // sorting nexin 6 // --- // 532685
12873446	0.0190693	0.0993	1.6	TLR6	NM_001001159 // TLR6 // toll-like receptor 6 // --- // 407237 /// ENSBTAT00000036014 //
12708296	0.0202238	0.103	1.6	C11H9orf167	XM_870775 // C11H9orf167 // chromosome 11 open reading frame, human C9orf167 // --- //
12678101	0.0236513	0.112	1.6
12858450	0.0274392	0.122	1.6	RAB21	NM_001075317 // RAB21 // RAB21, member RAS oncogene family // --- // 507488 /// BC11808
12879081	0.0007347	0.0222	1.59	GRPEL2	NM_001075674 // GRPEL2 // GrpE-like 2, mitochondrial (E. coli) // --- // 514599 /// ENS
12859746	0.0009226	0.0242	1.59	CCDC134	NM_001205826 // CCDC134 // coiled-coil domain containing 134 // --- // 516012 /// ENSBT
12906581	0.0009946	0.0249	1.59	MIR505	NR_031329 // MIR505 // microRNA mir-505 // --- // 100313062
12815958	0.0009991	0.0249	1.59	EMP2	ENSBTAT00000009444 // EMP2 // epithelial membrane protein 2 // --- // 507667 /// NM_001
12910332	0.0011454	0.0259	1.59	LOC618023	XM_002699749 // LOC618023 // Eso3 protein-like // --- // 618023
12890785	0.001201	0.0264	1.59	RGS3	ENSBTAT00000005904 // RGS3 // regulator of G-protein signaling 3 // --- // 527349 /// N
12893224	0.0012315	0.0265	1.59	NUDT18	XM_002689766 // NUDT18 // nudix (nucleoside diphosphate linked moiety X)-type motif 18
12765442	0.0013741	0.0278	1.59	YPEL2	NM_001079510 // YPEL2 // yippee-like 2 (Drosophila) // --- // 616180 /// ENSBTAT0000002
12706700	0.0016522	0.0294	1.59	AAK1	ENSBTAT00000012302 // AAK1 // AP2 associated kinase 1 // --- // ---
12888545	0.0021595	0.033	1.59
12794199	0.0023434	0.0343	1.59	AMIGO3	XM_002697038 // AMIGO3 // adhesion molecule with Ig-like domain 3 // --- // 100296605 /
12795499	0.002381	0.0345	1.59	GMPPB	ENSBTAT00000015403 // GMPPB // GDP-mannose pyrophosphorylase B // --- // 514161 /// NM_
12686683	0.002657	0.0363	1.59	ATP11B	ENSBTAT00000032070 // ATP11B // ATPase, class VI, type 11B // --- // 614392 /// XM_0026
12801220	0.0029195	0.0379	1.59	SERPINB6	NM_174789 // SERPINB6 // serpin peptidase inhibitor, clade B (ovalbumin), member 6 // -
12840861	0.0030312	0.0386	1.59	RGS5	NM_001034707 // RGS5 // regulator of G-protein signaling 5 // --- // 540509 /// ENSBTAT
12911693	0.0034245	0.041	1.59
12762540	0.0039815	0.044	1.59	FAM117A	NM_001101070 // FAM117A // family with sequence similarity 117, member A // --- // 5099
12766919	0.0040001	0.0441	1.59
12687540	0.0050818	0.0497	1.59	JMJD7	NM_001114658 // JMJD7 // jumonji domain containing 7 // --- // 100137087 /// ENSBTAT000
12792590	0.0056986	0.0522	1.59	PEX11A	NM_001075721 // PEX11A // peroxisomal biogenesis factor 11 alpha // --- // 515608 /// E
12791386	0.0060997	0.0539	1.59	ARHGAP5	XM_002696718 // ARHGAP5 // Rho GTPase activating protein 5 // --- // 788978 /// ENSBTAT
12792063	0.0062032	0.0541	1.59	SLC25A29	NM_001077871 // SLC25A29 // solute carrier family 25, member 29 // --- // 507686 /// EN
12757096	0.0062794	0.0545	1.59	LYPD3	ENSBTAT00000024068 // LYPD3 // LY6/PLAUR domain containing 3 // --- // 513150 /// NM_00
12860403	0.0091618	0.0664	1.59	CSDC2	NM_001076877 // CSDC2 // cold shock domain containing C2, RNA binding // --- // 525364
12758435	0.0120842	0.077	1.59	KLK6	NM_001101140 // KLK6 // kallikrein-related peptidase 6 // --- // 532677 /// ENSBTAT0000
12788284	0.0129979	0.0806	1.59	UBTD2	NM_001015679 // UBTD2 // ubiquitin domain containing 2 // --- // 541134 /// ENSBTAT0000
12684618	0.0131624	0.081	1.59	CBS	NM_001102000 // CBS // cystathionine-beta-synthase // --- // 514525 /// ENSBTAT00000000
12674885	0.0133796	0.0818	1.59
12907767	0.0138454	0.0833	1.59	SYAP1	NM_001034348 // SYAP1 // synapse associated protein 1 // --- // 509355 /// ENSBTAT00000
12913517	0.0138681	0.0833	1.59
12726731	0.0138974	0.0834	1.59	RCN1	ENSBTAT00000063521 // RCN1 // reticulocalbin 1, EF-hand calcium binding domain // --- /
12867769	0.0148129	0.0869	1.59	APOLD1	NM_001101180 // APOLD1 // apolipoprotein L domain containing 1 // --- // 538827 /// ENS
12675911	0.0152952	0.0884	1.59
12802065	0.0170631	0.0935	1.59	ATP6V1G2	NM_001075664 // ATP6V1G2 // ATPase, H+ transporting, lysosomal 13kDa, V1 subunit G2 //
12676343	0.0189238	0.099	1.59
12783359	0.022732	0.109	1.59	PAX7	XM_002685738 // PAX7 // paired box 7 // --- // 536229 /// ENSBTAT00000019924 // PAX7 //
12733908	0.0008405	0.0234	1.58	LOC785069	XM_001253208 // LOC785069 // olfactory receptor 1052-like // --- // 785069 /// ENSBTAT0
12840805	0.0010612	0.0252	1.58	ELOVL1	NM_001034703 // ELOVL1 // ELOVL fatty acid elongase 1 // --- // 540348 /// ENSBTAT00000
12850290	0.0015889	0.0288	1.58	ARHGEF5	NM_001110075 // ARHGEF5 // Rho guanine nucleotide exchange factor (GEF) 5 // --- // 516
12847465	0.0016755	0.0296	1.58	BTBD19	NM_001101241 // BTBD19 // BTB (POZ) domain containing 19 // --- // 615438 /// ENSBTAT00
12705724	0.0017127	0.0299	1.58	TMEM214	NM_001083432 // TMEM214 // transmembrane protein 214 // --- // 514683 /// ENSBTAT000000
12848219	0.0017722	0.0303	1.58	S100A7	XM_002686002 // S100A7 // S100 calcium binding protein A7 // --- // 786350 /// ENSBTAT0
12727723	0.0019917	0.0317	1.58	HBE2	NM_001014913 // HBE2 // globin, beta, epsilon 2 // --- // 513240
12764723	0.0029294	0.0379	1.58	STXBP4	NM_001192927 // STXBP4 // syntaxin binding protein 4 // --- // 537963 /// ENSBTAT000000
12863097	0.003543	0.0416	1.58	LOC785386	XM_002687966 // LOC785386 // ribosomal protein L10-like // --- // 785386
12840567	0.0037665	0.0427	1.58	KTI12	NM_001080737 // KTI12 // KTI12 homolog, chromatin associated (S. cerevisiae) // --- //
12690056	0.0042388	0.0454	1.58	F2R	NM_001103097 // F2R // coagulation factor II (thrombin) receptor // --- // 526585 /// E
12863031	0.0046378	0.0474	1.58	LOC784451	XM_001788179 // LOC784451 // C-type lectin domain family 2 member D11-like // --- // 78
12837963	0.0048136	0.0483	1.58	ZMYND12	NM_001191293 // ZMYND12 // zinc finger, MYND-type containing 12 // --- // 512257 /// BC
12782215	0.0052891	0.0506	1.58	DHDDS	NM_001035346 // DHDDS // dehydrodolichyl diphosphate synthase // --- // 523264 /// ENSB
12807792	0.0068347	0.0572	1.58	NEDD4L	ENSBTAT00000018334 // NEDD4L // neural precursor cell expressed, developmentally down-r
12798942	0.0086479	0.0645	1.58	SEC13	NM_001075565 // SEC13 // SEC13 homolog (S. cerevisiae) // --- // 512530 /// ENSBTAT0000
12825731	0.0107063	0.0723	1.58	C28H10orf99	BC116082 // C28H10orf99 // chromosome 28 open reading frame, human C10orf99 // --- // 1
12804717	0.0117452	0.0759	1.58	GCM1	NM_001205290 // GCM1 // glial cells missing homolog 1 (Drosophila) // --- // 317779 ///
12823578	0.0120198	0.0769	1.58
12801810	0.0122007	0.0774	1.58	ABHD16A	NM_001075605 // ABHD16A // abhydrolase domain containing 16A // --- // 513252 /// ENSBT
12837852	0.0125203	0.0787	1.58	RSPO1	NM_001105621 // RSPO1 // R-spondin 1 // --- // 511675 /// ENSBTAT00000005002 // RSPO1 /
12898323	0.012997	0.0806	1.58
12805611	0.0154714	0.0887	1.58	NFKBIL1	NM_001015597 // NFKBIL1 // nuclear factor of kappa light polypeptide gene enhancer in B
12713738	0.0162993	0.0915	1.58	PPP1R16B	NM_174824 // PPP1R16B // protein phosphatase 1, regulatory subunit 16B // --- // 282091
12895759	0.0179942	0.0963	1.58	NKX3-1	NM_001191155 // NKX3-1 // NK3 homeobox 1 // --- // 782252 /// ENSBTAT00000001615 // NKX
12674649	0.0199194	0.102	1.58
12851605	0.0228536	0.11	1.58	C1GALT1	NM_001076160 // C1GALT1 // core 1 synthase, glycoprotein-N-acetylgalactosamine 3-beta-g
12679305	0.0260343	0.118	1.58	LNP1	NM_001205535 // LNP1 // leukemia NUP98 fusion partner 1 // --- // 507217 /// BC149940 /
12675313	0.0289671	0.126	1.58
12904916	0.0473335	0.163	1.58	RP2	NM_001035403 // RP2 // retinitis pigmentosa 2 (X-linked recessive) // --- // 534054 ///
12825182	0.0007785	0.0225	1.57	SLC20A2	ENSBTAT00000019790 // SLC20A2 // solute carrier family 20 (phosphate transporter), memb
12709325	0.0009557	0.0245	1.57	GJB6	NM_001160177 // GJB6 // gap junction protein, beta 6, 30kDa // --- // 508454 /// ENSBTA
12820358	0.0010188	0.0249	1.57	TACC2	BC149058 // TACC2 // transforming, acidic coiled-coil containing protein 2 // --- // 53
12797985	0.0012419	0.0266	1.57	PPARG	NM_181024 // PPARG // peroxisome proliferator-activated receptor gamma // 22q24 // 2819
12728164	0.001332	0.0275	1.57	GRAMD1B	NM_001191419 // GRAMD1B // GRAM domain containing 1B // --- // 517332 /// ENSBTAT000000
12770584	0.0013809	0.0278	1.57
12709240	0.0014365	0.0281	1.57	ALG5	NM_001142365 // ALG5 // asparagine-linked glycosylation 5, dolichyl-phosphate beta-gluc
12813129	0.0014599	0.0282	1.57	C25H7orf50	NM_001110078 // C25H7orf50 // chromosome 25 open reading frame, human C7orf50 // --- //
12826339	0.002168	0.0331	1.57	TTC13	NM_001205860 // TTC13 // tetratricopeptide repeat domain 13 // --- // 519575 /// ENSBTA
12732724	0.0022404	0.0338	1.57	PVRL1	NM_001206022 // PVRL1 // poliovirus receptor-related 1 (herpesvirus entry mediator C) /
12771139	0.0043396	0.0459	1.57	ERN1	XM_001789477 // ERN1 // endoplasmic reticulum to nucleus signaling 1 // --- // 524719 /
12741946	0.0047045	0.0478	1.57	TCN2	NM_174195 // TCN2 // transcobalamin II // --- // 281518 /// ENSBTAT00000029446 // TCN2
12676357	0.005515	0.0515	1.57
12915245	0.0060534	0.0536	1.57
12868425	0.0063788	0.055	1.57	C5H12orf5	NM_001076370 // C5H12orf5 // chromosome 5 open reading frame, human C12orf5 // --- // 6
12785813	0.007029	0.058	1.57	CDC20B	ENSBTAT00000029276 // CDC20B // cell division cycle 20 homolog B (S. cerevisiae) // ---
12681108	0.0072297	0.0587	1.57	ACAD11	NM_001075893 // ACAD11 // acyl-CoA dehydrogenase family, member 11 // --- // 526956 ///
12777082	0.0094075	0.0672	1.57	ASAP3	NM_001083446 // ASAP3 // ArfGAP with SH3 domain, ankyrin repeat and PH domain 3 // ---
12675073	0.0124538	0.0784	1.57
12894910	0.013956	0.0837	1.57	ALG2	NM_001083491 // ALG2 // asparagine-linked glycosylation 2, alpha-1,3-mannosyltransferas
12823419	0.0140067	0.0839	1.57	MIR2401	NR_031253 // MIR2401 // microRNA mir-2401 // --- // 100313292
12792817	0.0168298	0.093	1.57	TRAPPC6B	NM_001038134 // TRAPPC6B // trafficking protein particle complex 6B // --- // 521470 //
12909970	0.0198372	0.102	1.57	ATP7A	NM_001192852 // ATP7A // ATPase, Cu++ transporting, alpha polypeptide // --- // 541275
12771894	0.020961	0.105	1.57	GPRC5C	BC110241 // GPRC5C // G protein-coupled receptor, family C, group 5, member C // --- //
12887654	0.0266268	0.12	1.57	LYSMD3	NM_001192982 // LYSMD3 // LysM, putative peptidoglycan-binding, domain containing 3 //
12676347	0.0268975	0.121	1.57
12759721	0.0271672	0.121	1.57	NAPA	NM_001192487 // NAPA // N-ethylmaleimide-sensitive factor attachment protein, alpha //
12678157	0.04788	0.164	1.57
12803149	0.0009328	0.0243	1.56	LOC537017	XM_617171 // LOC537017 // cytidine monophosphate-N-acetylneuraminic acid hydroxylase-li
12906784	0.0009873	0.0248	1.56
12723730	0.0011344	0.0257	1.56	TP53INP1	NM_001205423 // TP53INP1 // tumor protein p53 inducible nuclear protein 1 // --- // 782
12863589	0.0017911	0.0304	1.56	PNPLA3	ENSBTAT00000004368 // PNPLA3 // patatin-like phospholipase domain containing 3 // --- /
12901668	0.0018517	0.0307	1.56	MIR30A	NR_030969 // MIR30A // microRNA mir-30a // --- // 791053
12834605	0.002914	0.0378	1.56	LOC536947	XM_003588050 // LOC536947 // pregnancy-associated glycoprotein 1-like // --- // 536947
12851976	0.0029866	0.0384	1.56	AGAP3	XM_002687049 // AGAP3 // ArfGAP with GTPase domain, ankyrin repeat and PH domain 3 // -
12876402	0.0035412	0.0416	1.56	CPAMD8	ENSBTAT00000036405 // CPAMD8 // C3 and PZP-like, alpha-2-macroglobulin domain containin
12865340	0.0040315	0.0443	1.56	TSPAN31	NM_001037595 // TSPAN31 // tetraspanin 31 // --- // 510619 /// ENSBTAT00000009419 // TS
12676395	0.0044073	0.0462	1.56
12782662	0.0058416	0.0528	1.56	HECW2	ENSBTAT00000038307 // HECW2 // HECT, C2 and WW domain containing E3 ubiquitin protein l
12885519	0.0066421	0.0564	1.56	SAR1B	NM_001035315 // SAR1B // SAR1 homolog B (S. cerevisiae) // --- // 515999 /// ENSBTAT000
12835181	0.0117483	0.0759	1.56	ROBO4	NM_001099191 // ROBO4 // roundabout homolog 4, magic roundabout (Drosophila) // --- //
12823758	0.0131493	0.081	1.56	UBXN8	NM_001038672 // UBXN8 // UBX domain protein 8 // --- // 509646 /// ENSBTAT00000005462 /
12697087	0.0135795	0.0825	1.56	PLDN	NM_001076325 // PLDN // pallidin homolog (mouse) // --- // 614408 /// ENSBTAT0000001624
12724175	0.0144654	0.0855	1.56	PDP1	NM_001206353 // PDP1 // pyruvate dehyrogenase phosphatase catalytic subunit 1 // --- //
12736255	0.0149175	0.0872	1.56	QSOX1	NM_001102074 // QSOX1 // quiescin Q6 sulfhydryl oxidase 1 // --- // 522986 /// ENSBTAT0
12860168	0.016067	0.0907	1.56	LOC521214	XM_599474 // LOC521214 // apolipoprotein L, 3-like // --- // 521214 /// XM_002687678 //
12783828	0.0170616	0.0935	1.56	GMEB1	NM_001046475 // GMEB1 // glucocorticoid modulatory element binding protein 1 // --- //
12749428	0.0181406	0.0967	1.56	BCKDHA	NM_174506 // BCKDHA // branched chain keto acid dehydrogenase E1, alpha polypeptide //
12840667	0.0203214	0.103	1.56	GJA5	NM_001078022 // GJA5 // gap junction protein, alpha 5, 40kDa // --- // 539491 /// ENSBT
12851820	0.0204689	0.103	1.56	THAP5	NM_001076339 // THAP5 // THAP domain containing 5 // --- // 614615 /// ENSBTAT000000291
12828917	0.0312567	0.131	1.56	ZNF22	NM_001077108 // ZNF22 // zinc finger protein 22 (KOX 15) // --- // 768051 /// BC116093
12691488	0.0319406	0.132	1.56	CASC4	NM_001081737 // CASC4 // cancer susceptibility candidate 4 // --- // 540780 /// ENSBTAT
12792860	0.0343075	0.137	1.56	KLHL28	NM_001099030 // KLHL28 // kelch-like 28 (Drosophila) // --- // 525011 /// ENSBTAT000000
12714836	0.0351088	0.139	1.56	STAM	NM_001076842 // STAM // signal transducing adaptor molecule (SH3 domain and ITAM motif)
12688916	0.0010145	0.0249	1.55
12684644	0.0015551	0.0286	1.55	PRDM15	ENSBTAT00000065278 // PRDM15 // PR domain containing 15 // --- // 514566
12707965	0.0016026	0.0289	1.55	KHK	NM_001076351 // KHK // ketohexokinase (fructokinase) // --- // 614868 /// ENSBTAT000000
12851804	0.0018094	0.0305	1.55	C4H7orf23	NM_001078044 // C4H7orf23 // chromosome 4 open reading frame, human C7orf23 // --- // 6
12870519	0.0024188	0.0348	1.55	LOC505766	ENSBTAT00000064893 // LOC505766 // BMP-2-inducible protein kinase-like // --- // 505766
12718810	0.002425	0.0348	1.55	ACBD7	NM_001113297 // ACBD7 // acyl-CoA binding domain containing 7 // --- // 508284 /// ENSB
12811697	0.0024406	0.0348	1.55	BFAR	NM_001098869 // BFAR // bifunctional apoptosis regulator // --- // 504902 /// ENSBTAT00
12810714	0.002713	0.0365	1.55	IER3IP1	NM_001113320 // IER3IP1 // immediate early response 3 interacting protein 1 // --- // 7
12744947	0.0030024	0.0385	1.55	HRK	NM_001191241 // HRK // harakiri, BCL2 interacting protein (contains only BH3 domain) //
12695694	0.0035284	0.0416	1.55
12708050	0.003622	0.042	1.55	FAM102A	NM_001193094 // FAM102A // family with sequence similarity 102, member A // --- // 6159
12745541	0.0038347	0.0431	1.55	ATP6V0A2	NM_176637 // ATP6V0A2 // ATPase, H+ transporting, lysosomal V0 subunit a2 // --- // 338
12830461	0.0039811	0.044	1.55	DAK	NM_001024524 // DAK // dihydroxyacetone kinase 2 homolog (S. cerevisiae) // --- // 5123
12726842	0.005045	0.0495	1.55
12677807	0.0051059	0.0498	1.55
12676365	0.00546	0.0514	1.55
12676937	0.0061965	0.0541	1.55
12914103	0.0062284	0.0542	1.55
12869693	0.0065459	0.0559	1.55	LOC100336936	ENSBTAT00000065725 // LOC100336936 // phosphatidate cytidylyltransferase 1-like // ---
12894843	0.0068974	0.0574	1.55	SHB	NM_001192934 // SHB // Src homology 2 domain containing adaptor protein B // --- // 538
12900759	0.00759	0.0603	1.55	SLC18B1	ENSBTAT00000020271 // SLC18B1 // solute carrier family 18, subfamily B, member 1 // ---
12676689	0.0099362	0.0694	1.55
12898830	0.0101228	0.0701	1.55	TMEM181	XM_002707841 // TMEM181 // transmembrane protein 181 // --- // 614300 /// ENSBTAT000000
12843331	0.0110218	0.0733	1.55	GADD45A	NM_001034247 // GADD45A // growth arrest and DNA-damage-inducible, alpha // --- // 5054
12901144	0.0111055	0.0736	1.55	FBXO30	NM_001205667 // FBXO30 // F-box protein 30 // --- // 539435 /// ENSBTAT00000007075 // F
12693704	0.0134729	0.0822	1.55	SPG21	NM_205772 // SPG21 // spastic paraplegia 21 (autosomal recessive, Mast syndrome) // ---
12798073	0.0145119	0.0856	1.55	ITPR1	NM_174841 // ITPR1 // inositol 1,4,5-trisphosphate receptor, type 1 // --- // 317697 //
12815677	0.0149939	0.0874	1.55	HIP1	NM_001192078 // HIP1 // huntingtin interacting protein 1 // --- // 505919 /// ENSBTAT00
12676717	0.0160314	0.0906	1.55
12730750	0.0167172	0.0928	1.55	MCAM	NM_001110062 // MCAM // melanoma cell adhesion molecule // --- // 281301 /// ENSBTAT000
12861380	0.0221914	0.108	1.55	YAF2	NM_001076079 // YAF2 // YY1 associated factor 2 // --- // 536696 /// ENSBTAT00000064422
12787942	0.0352707	0.139	1.55	ITGA1	XM_002696339 // ITGA1 // integrin, alpha 1 // --- // 535951 /// ENSBTAT00000034583 // I
12907613	0.0359212	0.14	1.55	PGK1	NM_001034299 // PGK1 // phosphoglycerate kinase 1 // Xq25 // 507476 /// ENSBTAT00000001
12808525	0.001053	0.0251	1.54	ZNF24	NM_001205479 // ZNF24 // zinc finger protein 24 // --- // 538969 /// ENSBTAT00000002428
12891631	0.0011846	0.0262	1.54	PTK2B	NM_001102252 // PTK2B // PTK2B protein tyrosine kinase 2 beta // --- // 541008 /// ENSB
12824843	0.00137	0.0278	1.54	ANGPT2	NM_001098855 // ANGPT2 // angiopoietin 2 // --- // 282141 /// ENSBTAT00000014656 // ANG
12825536	0.001389	0.0279	1.54	PPAPDC1B	BC104581 // PPAPDC1B // phosphatidic acid phosphatase type 2 domain containing 1B // --
12719300	0.0020326	0.0319	1.54	SLA2	ENSBTAT00000026137 // SLA2 // Src-like-adaptor 2 // --- // 514398 /// NM_001035294 // S
12903671	0.0023129	0.0342	1.54	CXHXorf23	BT021587 // CXHXorf23 // chromosome X open reading frame, human CXorf23 // --- // 51100
12729557	0.0025522	0.0358	1.54	ZBED5	NM_001099388 // ZBED5 // zinc finger, BED-type containing 5 // --- // 539898 /// ENSBTA
12772406	0.0026985	0.0365	1.54
12887339	0.0029356	0.038	1.54	PCDH12	NM_001098111 // PCDH12 // protocadherin 12 // --- // 540115 /// ENSBTAT00000011099 // P
12729122	0.0040694	0.0445	1.54	TRIM3	NM_001101157 // TRIM3 // tripartite motif containing 3 // --- // 534510 /// ENSBTAT0000
12915317	0.004075	0.0445	1.54
12676917	0.004094	0.0447	1.54
12738550	0.005184	0.0501	1.54	SELL	NM_174182 // SELL // selectin L // --- // 281485 /// ENSBTAT00000046865 // SELL // sele
12906003	0.0054216	0.0512	1.54
12912877	0.0060458	0.0536	1.54
12914721	0.0062906	0.0545	1.54
12766734	0.0063838	0.055	1.54
12775103	0.0071282	0.0583	1.54	GYPC	NM_001002886 // GYPC // glycophorin C (Gerbich blood group) // --- // 444863 /// ENSBTA
12799129	0.0072299	0.0587	1.54	CLEC3B	NM_001046212 // CLEC3B // C-type lectin domain family 3, member B // --- // 515783 ///
12883595	0.0096407	0.0682	1.54	INSR	ENSBTAT00000016858 // INSR // insulin receptor // --- // 408017
12721560	0.0137931	0.0831	1.54	MIR2310	NR_031046 // MIR2310 // microRNA mir-2310 // --- // 100313355
12738794	0.0141375	0.0843	1.54	PYCR2	NM_001075181 // PYCR2 // pyrroline-5-carboxylate reductase family, member 2 // --- // 5
12895744	0.0149728	0.0873	1.54	GNE	NM_001191143 // GNE // glucosamine (UDP-N-acetyl)-2-epimerase/N-acetylmannosamine kinas
12725802	0.0152127	0.0881	1.54	EBAG9	NM_001078015 // EBAG9 // estrogen receptor binding site associated, antigen, 9 // --- /
12682427	0.0157769	0.0897	1.54	TMEM50B	NM_001034786 // TMEM50B // transmembrane protein 50B // --- // 615627 /// ENSBTAT000000
12794535	0.0241584	0.113	1.54	TKT	ENSBTAT00000004892 // TKT // transketolase // --- // 445425 /// NM_001003906 // TKT //
12698486	0.026107	0.118	1.54	ANXA4	NM_001001440 // ANXA4 // annexin A4 // --- // 281625 /// ENSBTAT00000001463 // ANXA4 //
12912151	0.0263574	0.119	1.54
12836948	0.0298839	0.128	1.54	BCAR3	ENSBTAT00000063777 // BCAR3 // breast cancer anti-estrogen resistance 3 // --- // 50623
12832069	0.0308715	0.13	1.54	ASRGL1	NM_001077035 // ASRGL1 // asparaginase like 1 // --- // 767970 /// ENSBTAT00000009073 /
12912659	0.0360505	0.141	1.54
12878470	0.001043	0.0251	1.53	ZNF608	NM_001206306 // ZNF608 // zinc finger protein 608 // --- // 509992 /// ENSBTAT000000214
12676661	0.0010504	0.0251	1.53
12674633	0.0010963	0.0255	1.53
12810797	0.0013247	0.0275	1.53	KCTD5	NM_001103341 // KCTD5 // potassium channel tetramerisation domain containing 5 // --- /
12911611	0.0014414	0.0281	1.53
12736903	0.0014452	0.0281	1.53	SMG7	NM_001193205 // SMG7 // smg-7 homolog, nonsense mediated mRNA decay factor (C. elegans)
12894239	0.0015406	0.0286	1.53	JAK2	XM_003586385 // JAK2 // Janus kinase 2 // --- // 525246 /// ENSBTAT00000015986 // JAK2
12763351	0.0015497	0.0286	1.53
12782389	0.0018641	0.0309	1.53	TMEM185B	NM_001077968 // TMEM185B // transmembrane protein 185B // --- // 526189 /// ENSBTAT0000
12675827	0.0019495	0.0315	1.53
12826881	0.0035555	0.0417	1.53	TSPAN14	NM_001046448 // TSPAN14 // tetraspanin 14 // --- // 539055 /// ENSBTAT00000005102 // TS
12738867	0.0038068	0.0429	1.53	LAD1	NM_001075219 // LAD1 // ladinin 1 // --- // 505686 /// ENSBTAT00000034341 // LAD1 // la
12887005	0.0039677	0.0439	1.53	EBF1	NM_001192916 // EBF1 // early B-cell factor 1 // --- // 537712 /// ENSBTAT00000061073 /
12676209	0.0059694	0.0533	1.53
12828220	0.0074944	0.0599	1.53	LOC522998	ENSBTAT00000004143 // LOC522998 // coiled-coil domain-containing protein 6-like // ---
12674677	0.008126	0.0625	1.53
12676389	0.0096416	0.0682	1.53
12911819	0.0099682	0.0696	1.53
12870320	0.0109775	0.0731	1.53	USO1	NM_174845 // USO1 // USO1 vesicle docking protein homolog (yeast) // --- // 317724 ///
12742481	0.0154348	0.0887	1.53	SFRP2	NM_001034393 // SFRP2 // secreted frizzled-related protein 2 // --- // 510821 /// ENSBT
12745810	0.0188157	0.0987	1.53	FICD	NM_001205526 // FICD // FIC domain containing // --- // 505923 /// ENSBTAT00000015620 /
12888541	0.0202735	0.103	1.53	LOC789022	XM_002689095 // LOC789022 // olfactory receptor, family 2, subfamily T, member 1-like /
12677847	0.0211911	0.105	1.53
12674655	0.0299366	0.128	1.53
12681008	0.0306933	0.13	1.53	LOC524181	XM_002684720 // LOC524181 // uncharacterized LOC524181 // --- // 524181 /// XM_00268472
12793349	0.0373931	0.143	1.53	UNC45A	NM_001099072 // UNC45A // unc-45 homolog A (C. elegans) // --- // 535692 /// ENSBTAT000
12914395	0.0463678	0.161	1.53
12861173	0.0496283	0.168	1.53	SYNGR1	NM_001034623 // SYNGR1 // synaptogyrin 1 // --- // 534995 /// ENSBTAT00000042673 // SYN
12793571	0.0012154	0.0264	1.52	CRTC3	XM_591546 // CRTC3 // CREB regulated transcription coactivator 3 // --- // 540109 /// E
12740247	0.0012847	0.0271	1.52	FLVCR1	NM_001206019 // FLVCR1 // feline leukemia virus subgroup C cellular receptor 1 // --- /
12869471	0.001296	0.0272	1.52	MIR148B	NR_031370 // MIR148B // microRNA mir-148b // --- // 791029
12683618	0.0014096	0.028	1.52	CD80	NM_001206439 // CD80 // CD80 molecule // --- // 407131 /// ENSBTAT00000024042 // CD80 /
12847611	0.00141	0.028	1.52	FNBP1L	BC134640 // FNBP1L // formin binding protein 1-like // --- // 616665 /// ENSBTAT0000000
12676371	0.0017851	0.0304	1.52
12766723	0.001811	0.0306	1.52	KRTAP17-1	XM_002695988 // KRTAP17-1 // keratin associated protein 17-1 // --- // 100297004
12780694	0.0018569	0.0308	1.52	STX12	NM_001101053 // STX12 // syntaxin 12 // --- // 505538 /// ENSBTAT00000001580 // STX12 /
12902371	0.0022469	0.0338	1.52	ZAR1	DQ231453 // ZAR1 // zygote arrest 1 // --- // 540150
12678867	0.0022492	0.0338	1.52
12863633	0.002614	0.036	1.52	MIR141	NR_030864 // MIR141 // microRNA mir-141 // --- // 100313001
12823293	0.0026551	0.0363	1.52	MIR107	NR_031010 // MIR107 // microRNA mir-107 // --- // 791005
12754174	0.0027625	0.0368	1.52	GPT2	NM_001193187 // GPT2 // glutamic pyruvate transaminase (alanine aminotransferase) 2 //
12738690	0.0032013	0.0395	1.52	TNFRSF1B	NM_001040490 // TNFRSF1B // tumor necrosis factor receptor superfamily, member 1B // --
12861056	0.0036247	0.042	1.52	TMEM194A	NM_001102161 // TMEM194A // transmembrane protein 194A // --- // 533988 /// ENSBTAT0000
12773782	0.0038182	0.043	1.52	LOC100125266	NM_001103322 // LOC100125266 // alkaline phosphatase-like // --- // 100125266 /// ENSBT
12747149	0.0049721	0.0492	1.52	FAM160A1	XM_607376 // FAM160A1 // family with sequence similarity 160, member A1 // --- // 52893
12822603	0.0050747	0.0497	1.52	NRAP	NM_001098072 // NRAP // nebulin-related anchoring protein // --- // 532640 /// ENSBTAT0
12804297	0.0050791	0.0497	1.52
12687070	0.0064354	0.0553	1.52	IL10RB	NM_001076975 // IL10RB // interleukin 10 receptor, beta // --- // 767864 /// ENSBTAT000
12913601	0.0067166	0.0567	1.52
12676377	0.0067325	0.0567	1.52
12761817	0.0077879	0.0611	1.52	APPBP2	XM_002695642 // APPBP2 // amyloid beta precursor protein (cytoplasmic tail) binding pro
12674675	0.0086908	0.0647	1.52
12915663	0.0091003	0.0662	1.52
12676701	0.0103507	0.0709	1.52
12823690	0.0154651	0.0887	1.52	TACC1	ENSBTAT00000005554 // TACC1 // transforming, acidic coiled-coil containing protein 1 //
12874296	0.020693	0.104	1.52	USP46	NM_001192444 // USP46 // ubiquitin specific peptidase 46 // --- // 516420 /// ENSBTAT00
12833412	0.0214599	0.106	1.52	AQP11	NM_001110069 // AQP11 // aquaporin 11 // --- // 510038 /// ENSBTAT00000026547 // AQP11
12749946	0.0241585	0.113	1.52	ZNF575	NM_001040503 // ZNF575 // zinc finger protein 575 // --- // 504571 /// ENSBTAT000000437
12750648	0.0275212	0.122	1.52	PSKH1	NM_001075413 // PSKH1 // protein serine kinase H1 // --- // 509656 /// ENSBTAT000000240
12705899	0.0290585	0.126	1.52	SH2D3C	NM_001098039 // SH2D3C // SH2 domain containing 3C // --- // 515820 /// ENSBTAT00000020
12887383	0.0292822	0.126	1.52	ISOC1	ENSBTAT00000035645 // ISOC1 // isochorismatase domain containing 1 // --- // 540524 ///
12677669	0.049256	0.167	1.52
12832640	0.0013593	0.0278	1.51	SAA3	NM_181016 // SAA3 // serum amyloid A 3 // --- // 281474 /// ENSBTAT00000030328 // SAA3
12867352	0.0014187	0.028	1.51	PLEKHG6	ENSBTAT00000005514 // PLEKHG6 // pleckstrin homology domain containing, family G (with
12797659	0.0014978	0.0284	1.51	ZXDC	ENSBTAT00000064461 // ZXDC // ZXD family zinc finger C // --- // 789590
12865562	0.0016178	0.0291	1.51	NFAM1	ENSBTAT00000006606 // NFAM1 // NFAT activating protein with ITAM motif 1 // --- // 5121
12911613	0.0019039	0.0311	1.51
12845755	0.0021606	0.033	1.51	MPL	NM_001192663 // MPL // myeloproliferative leukemia virus oncogene // --- // 528492 ///
12825927	0.0025103	0.0355	1.51	ANXA11	ENSBTAT00000027893 // ANXA11 // annexin A11 // --- // 282142 /// NM_174502 // ANXA11 //
12911345	0.0026025	0.036	1.51
12710768	0.0026415	0.0361	1.51	CDX2	NM_001206299 // CDX2 // caudal type homeobox 2 // --- // 618679
12770264	0.0026723	0.0363	1.51	LIG3	NM_001038107 // LIG3 // ligase III, DNA, ATP-dependent // --- // 514719 /// ENSBTAT0000
12906285	0.003607	0.0419	1.51	MIR545	NR_031358 // MIR545 // microRNA mir-545 // --- // 791022
12893297	0.0036089	0.0419	1.51	C8H9orf95	XM_002689653 // C8H9orf95 // chromosome 8 open reading frame, human C9orf95 // --- // 5
12775752	0.0036537	0.0422	1.51	CHN1	ENSBTAT00000010556 // CHN1 // chimerin (chimaerin) 1 // --- // 508266 /// NM_001113247
12825774	0.0040999	0.0447	1.51	HK1	NM_001012668 // HK1 // hexokinase 1 // --- // 280817 /// ENSBTAT00000047248 // HK1 // h
12857905	0.0041249	0.0448	1.51	HMGXB4	NM_001101856 // HMGXB4 // HMG box domain containing 4 // --- // 505539 /// ENSBTAT00000
12883035	0.0041482	0.0449	1.51	F12	ENSBTAT00000025122 // F12 // coagulation factor XII (Hageman factor) // --- // 280789 /
12700172	0.0049592	0.0492	1.51	MOGS	ENSBTAT00000002408 // MOGS // mannosyl-oligosaccharide glucosidase // --- // 516155 ///
12676659	0.0052157	0.0503	1.51
12805515	0.0052418	0.0504	1.51	GTPBP2	NM_001083421 // GTPBP2 // GTP binding protein 2 // --- // 513605 /// ENSBTAT00000007903
12913483	0.0056564	0.0521	1.51
12691334	0.0056799	0.0522	1.51	TINF2	ENSBTAT00000003522 // TINF2 // TERF1 (TRF1)-interacting nuclear factor 2 // --- // 5404
12766352	0.0112294	0.0742	1.51	UBE2O	XM_001256183 // UBE2O // ubiquitin-conjugating enzyme E2O // --- // 789422 /// XM_00269
12747298	0.0114607	0.0751	1.51	SETD8	NM_001046330 // SETD8 // SET domain containing (lysine methyltransferase) 8 // --- // 5
12686304	0.0126257	0.0791	1.51	HES1	NM_001034678 // HES1 // hairy and enhancer of split 1, (Drosophila) // --- // 539547 //
12742487	0.0130185	0.0806	1.51	TPCN1	XM_002694517 // TPCN1 // two pore segment channel 1 // --- // 510830 /// ENSBTAT0000002
12707025	0.0138495	0.0833	1.51	TOR2A	NM_001083476 // TOR2A // torsin family 2, member A // --- // 534311 /// ENSBTAT00000017
12683607	0.0144523	0.0854	1.51	POFUT2	NM_205782 // POFUT2 // protein O-fucosyltransferase 2 // --- // 404083 /// BC140500 //
12778135	0.0181489	0.0967	1.51	ACVR1C	ENSBTAT00000025753 // ACVR1C // activin A receptor, type IC // --- // 536380
12688454	0.0191457	0.0996	1.51	PTGR2	NM_001075249 // PTGR2 // prostaglandin reductase 2 // --- // 506263 /// ENSBTAT00000004
12910228	0.0228272	0.11	1.51	LOC615842	ENSBTAT00000030123 // LOC615842 // AMME syndrome candidate gene 1 protein-like // --- /
12683071	0.0235046	0.112	1.51	LSAMP	NM_001205368 // LSAMP // neuronal growth regulator 1-like // --- // 100336456
12714979	0.0267426	0.12	1.51	BTBD3	ENSBTAT00000025703 // BTBD3 // BTB (POZ) domain containing 3 // --- // 513420 /// XM_00
12710601	0.0275067	0.122	1.51	LOC614423	XR_082869 // LOC614423 // phosphoglycerate mutase 1-like // --- // 614423
12779757	0.0014172	0.028	1.5	SPATA21	XM_002685799 // SPATA21 // spermatogenesis associated 21 // --- // 789347 /// XM_001256
12815016	0.0020597	0.0321	1.5	LOC100300956	XM_002698099 // LOC100300956 // uncharacterized LOC100300956 // --- // 100300956
12846082	0.0025807	0.0359	1.5	MAN1A2	NM_001206877 // MAN1A2 // mannosidase, alpha, class 1A, member 2 // --- // 532645 /// E
12680230	0.0026991	0.0365	1.5	MORC3	BC151785 // MORC3 // MORC family CW-type zinc finger 3 // --- // 513807
12760345	0.0027087	0.0365	1.5	CYTH1	ENSBTAT00000008751 // CYTH1 // cytohesin 1 // --- // 100141038
12802848	0.0029095	0.0378	1.5	UHRF1BP1	XM_613916 // UHRF1BP1 // UHRF1 binding protein 1 // --- // 534225 /// ENSBTAT0000001221
12793821	0.0032353	0.0398	1.5	CCDC85C	NM_001144998 // CCDC85C // coiled-coil domain containing 85C // --- // 617455 /// ENSBT
12880479	0.003465	0.0411	1.5	FBXO38	NM_001192778 // FBXO38 // F-box protein 38 // --- // 533554 /// ENSBTAT00000027060 // F
12763352	0.0045326	0.0468	1.5
12790124	0.0060354	0.0536	1.5	ALPK3	ENSBTAT00000002122 // ALPK3 // alpha-kinase 3 // --- // 516866
12830772	0.006477	0.0555	1.5	SCYL1	NM_001102021 // SCYL1 // SCY1-like 1 (S. cerevisiae) // --- // 515247 /// ENSBTAT000000
12802523	0.0065026	0.0557	1.5	UBR2	NM_001192638 // UBR2 // ubiquitin protein ligase E3 component n-recognin 2 // --- // 52
12776458	0.0075836	0.0602	1.5	EYA3	NM_001206731 // EYA3 // eyes absent homolog 3 (Drosophila) // --- // 514364 /// ENSBTAT
12676645	0.0101942	0.0703	1.5
12676161	0.0117045	0.0758	1.5
12865465	0.0152774	0.0883	1.5	NR2C1	ENSBTAT00000023577 // NR2C1 // nuclear receptor subfamily 2, group C, member 1 // --- /
12741547	0.0153492	0.0886	1.5
12755098	0.015663	0.0893	1.5	LOC100138449	BC149160 // LOC100138449 // zinc finger protein 551-like // --- // 100138449
12783344	0.0248542	0.115	1.5	UBXN4	NM_001035414 // UBXN4 // UBX domain protein 4 // --- // 536181 /// ENSBTAT00000020184 /
12850007	0.0403672	0.15	1.5	GNG11	NM_001024523 // GNG11 // guanine nucleotide binding protein (G protein), gamma 11 // --
12730673	0.0443352	0.158	1.5	LOC100337287	ENSBTAT00000021394 // LOC100337287 // zinc finger protein 76 (expressed in testis)-like
12784487	0.0484041	0.165	1.5	LOC618533	ENSBTAT00000066114 // LOC618533 // peptidylprolyl isomerase-like 1 pseudogene // --- //
12754588	0.0013477	0.0276	0.67	ZNF473	ENSBTAT00000016000 // ZNF473 // zinc finger protein 473 // --- // ---
12814073	0.0017788	0.0303	0.67	TCEB2	ENSBTAT00000026036 // TCEB2 // transcription elongation factor B (SIII), polypeptide 2
12795077	0.0019116	0.0311	0.67	ASB14	NM_001035070 // ASB14 // ankyrin repeat and SOCS box containing 14 // --- // 509431 ///
12762400	0.0019614	0.0315	0.67	NKIRAS2	ENSBTAT00000003442 // NKIRAS2 // NFKB inhibitor interacting Ras-like 2 // --- // 509053
12705982	0.0020138	0.0319	0.67	C8G	NM_001110076 // C8G // complement component 8, gamma polypeptide // --- // 517356 /// E
12799617	0.002093	0.0324	0.67	PLXNA1	ENSBTAT00000030589 // PLXNA1 // plexin A1 // --- // --- /// XM_003582046 // LOC10085171
12766339	0.0024844	0.0352	0.67	PRPSAP1	NM_001076857 // PRPSAP1 // phosphoribosyl pyrophosphate synthetase-associated protein 1
12838856	0.0027556	0.0368	0.67	SELRC1	XM_002686401 // SELRC1 // Sel1 repeat containing 1 // --- // 520518 /// ENSBTAT00000002
12900858	0.0029115	0.0378	0.67	TFB1M	NM_001114610 // TFB1M // transcription factor B1, mitochondrial // --- // 533438 /// NM
12749226	0.0030748	0.0389	0.67
12868212	0.0035666	0.0418	0.67	TBC1D30	XM_614299 // TBC1D30 // TBC1 domain family, member 30 // --- // 541051 /// ENSBTAT00000
12825035	0.0038841	0.0434	0.67	KIAA1430	NM_001045999 // KIAA1430 // KIAA1430 ortholog // --- // 508280 /// ENSBTAT00000017582 /
12804661	0.0047714	0.0481	0.67	TNXB	ENSBTAT00000001893 // TNXB // tenascin XB // --- // 282654 /// NM_174703 // TNXB // ten
12911775	0.0051688	0.0501	0.67
12771690	0.0052301	0.0504	0.67	MPRIP	NM_001105627 // MPRIP // myosin phosphatase Rho interacting protein // --- // 533979 //
12846488	0.0060934	0.0538	0.67	MSTO1	NM_001046408 // MSTO1 // misato homolog 1 (Drosophila) // --- // 535567 /// ENSBTAT0000
12746496	0.0081299	0.0625	0.67	LOC513251	ENSBTAT00000061299 // LOC513251 // UPF0462 protein C4orf33-like // --- // 513251
12785900	0.0100609	0.0699	0.67	SERF1A	ENSBTAT00000048677 // SERF1A // small EDRK-rich factor 1A (telomeric) // --- // 526395
12763236	0.0106322	0.072	0.67	NAT9	NM_001103246 // NAT9 // N-acetyltransferase 9 (GCN5-related, putative) // --- // 514377
12701813	0.0132434	0.0812	0.67	POLR1A	NM_001192876 // POLR1A // polymerase (RNA) I polypeptide A, 194kDa // --- // 536316 ///
12780866	0.001106	0.0256	0.66	TANC1	XM_002685349 // TANC1 // tetratricopeptide repeat, ankyrin repeat and coiled-coil conta
12904406	0.001106	0.0256	0.66	ZMYM3	NM_001193249 // ZMYM3 // zinc finger, MYM-type 3 // --- // 522721 /// ENSBTAT0000001119
12830904	0.0011755	0.0262	0.66	IGSF9B	XM_002707798 // IGSF9B // immunoglobulin superfamily, member 9B // --- // 517432 /// EN
12761729	0.0011789	0.0262	0.66	EXOC7	ENSBTAT00000034703 // EXOC7 // exocyst complex component 7 // --- // 505568 /// NM_0010
12835528	0.0012294	0.0265	0.66	LOC100296849	XR_083642 // LOC100296849 // protein BEX3-like // --- // 100296849
12683817	0.0012802	0.0271	0.66
12703901	0.0013201	0.0274	0.66	GGTA1	ENSBTAT00000016033 // GGTA1 // alpha-galactosyltransferase 1 (glycoprotein) // 11q26 //
12865160	0.0013262	0.0275	0.66	RBMS2	NM_001034365 // RBMS2 // RNA binding motif, single stranded interacting protein 2 // --
12905875	0.0013836	0.0278	0.66	TSPYL2	XM_002707327 // TSPYL2 // TSPY-like 2 // --- // 617179 /// ENSBTAT00000023648 // TSPYL2
12697941	0.0014208	0.028	0.66	ENTPD2	ENSBTAT00000063714 // ENTPD2 // ectonucleoside triphosphate diphosphohydrolase 2 // ---
12677165	0.001451	0.0282	0.66
12757026	0.0014592	0.0282	0.66	CEP89	BC134749 // CEP89 // centrosomal protein 89kDa // --- // 512749 /// ENSBTAT00000006395
12775110	0.0014723	0.0283	0.66	HSPG2	ENSBTAT00000022744 // HSPG2 // heparan sulfate proteoglycan 2 // --- // 444872
12758651	0.0014886	0.0283	0.66	HSPB6	NM_001076027 // HSPB6 // heat shock protein, alpha-crystallin-related, B6 // --- // 534
12687438	0.0014935	0.0284	0.66	PPP2R3A	BC149028 // PPP2R3A // protein phosphatase 2, regulatory subunit B'', alpha // --- // 7
12724824	0.0015161	0.0285	0.66	WDR67	NM_001046073 // WDR67 // WD repeat domain 67 // --- // 511062 /// ENSBTAT00000028197 //
12845552	0.0015279	0.0286	0.66	ABCD3	NM_001105396 // ABCD3 // ATP-binding cassette, sub-family D (ALD), member 3 // --- // 5
12765550	0.0015317	0.0286	0.66	WIPF2	NM_001206276 // WIPF2 // WAS/WASL interacting protein family, member 2 // --- // 616849
12886637	0.0015527	0.0286	0.66	DNAJC18	NM_001015649 // DNAJC18 // DnaJ (Hsp40) homolog, subfamily C, member 18 // --- // 53366
12725399	0.001677	0.0296	0.66	PCMTD1	NM_001081526 // PCMTD1 // protein-L-isoaspartate (D-aspartate) O-methyltransferase doma
12722604	0.0017038	0.0298	0.66	LRP12	NM_001192981 // LRP12 // low density lipoprotein receptor-related protein 12 // --- //
12722321	0.0017573	0.0302	0.66	RPL30	NM_001034434 // RPL30 // ribosomal protein L30 // --- // 513031 /// ENSBTAT00000021651
12734319	0.0017791	0.0303	0.66	LOC100336917	ENSBTAT00000034028 // LOC100336917 // dehydrogenase/reductase (SDR family) member 3-lik
12865176	0.0018772	0.031	0.66	SUOX	NM_001034366 // SUOX // sulfite oxidase // --- // 509837 /// ENSBTAT00000008101 // SUOX
12740892	0.0019012	0.0311	0.66	ITPKB	ENSBTAT00000025755 // ITPKB // inositol-trisphosphate 3-kinase B // --- // ---
12676781	0.0019024	0.0311	0.66
12817807	0.0019165	0.0312	0.66	GTF2I	NM_001102177 // GTF2I // general transcription factor IIi // --- // 534669 /// ENSBTAT0
12792023	0.0019552	0.0315	0.66	FES	NM_001032300 // FES // feline sarcoma oncogene // --- // 507304 /// ENSBTAT00000003828
12687517	0.0019677	0.0315	0.66	AP1G2	NM_001109808 // AP1G2 // adaptor-related protein complex 1, gamma 2 subunit // --- // 1
12725938	0.0023184	0.0342	0.66	ZNF623	XM_003583019 // ZNF623 // zinc finger protein 623 // --- // 540256
12705971	0.0024324	0.0348	0.66	RMND5A	NM_001205832 // RMND5A // required for meiotic nuclear division 5 homolog A (S. cerevis
12902444	0.002441	0.0348	0.66	ASB12	NM_001192225 // ASB12 // ankyrin repeat and SOCS box containing 12 // --- // 539344 ///
12772761	0.0024921	0.0353	0.66	ORMDL3	ENSBTAT00000018402 // ORMDL3 // ORM1-like 3 (S. cerevisiae) // --- // 615368 /// NM_001
12769776	0.0025146	0.0355	0.66	SLC43A2	NM_001075546 // SLC43A2 // solute carrier family 43, member 2 // --- // 511955 /// ENSB
12694667	0.0026249	0.0361	0.66	DHRS7	NM_001046162 // DHRS7 // dehydrogenase/reductase (SDR family) member 7 // --- // 514044
12738207	0.0026701	0.0363	0.66	HHAT	XM_002694295 // HHAT // hedgehog acyltransferase // --- // 100336796 /// XM_003585258 /
12878930	0.0027006	0.0365	0.66	MUM1	NM_001075622 // MUM1 // melanoma associated antigen (mutated) 1 // --- // 513471 /// EN
12886579	0.0027077	0.0365	0.66	LOC533444	ENSBTAT00000016037 // LOC533444 // gem-associated protein 5-like // --- // 533444
12753064	0.0027937	0.0371	0.66	EMP3	NM_001024562 // EMP3 // epithelial membrane protein 3 // --- // 535273 /// ENSBTAT00000
12824248	0.002877	0.0376	0.66	PLEKHA2	BC103474 // PLEKHA2 // pleckstrin homology domain containing, family A (phosphoinositid
12694106	0.0029158	0.0378	0.66	ACYP1	ENSBTAT00000018595 // ACYP1 // acylphosphatase 1, erythrocyte (common) type // --- // 5
12809378	0.0029567	0.0381	0.66	YES1	NM_001101060 // YES1 // v-yes-1 Yamaguchi sarcoma viral oncogene homolog 1 // --- // 50
12684755	0.0030864	0.039	0.66	RNF7	NM_001075720 // RNF7 // ring finger protein 7 // --- // 515595 /// ENSBTAT00000002831 /
12693726	0.0031388	0.0392	0.66	GCNT3	NM_205809 // GCNT3 // glucosaminyl (N-acetyl) transferase 3, mucin type // --- // 40416
12885694	0.0031574	0.0393	0.66	SIN3B	ENSBTAT00000036414 // SIN3B // SIN3 transcription regulator homolog B (yeast) // --- //
12772356	0.0032091	0.0395	0.66	ZMYND15	XM_002695775 // ZMYND15 // zinc finger, MYND-type containing 15 // --- // 539735 /// EN
12903439	0.0032588	0.0399	0.66	FMR1	NM_001192150 // FMR1 // fragile X mental retardation 1 // --- // 507482 /// ENSBTAT0000
12837997	0.003592	0.0419	0.66	PRKAB2	NM_001192328 // PRKAB2 // protein kinase, AMP-activated, beta 2 non-catalytic subunit /
12872375	0.0036515	0.0422	0.66	TBC1D19	NM_001076938 // TBC1D19 // TBC1 domain family, member 19 // --- // 615452 /// ENSBTAT00
12701514	0.003698	0.0424	0.66	UXS1	NM_001206064 // UXS1 // UDP-glucuronate decarboxylase 1 // --- // 534788 /// ENSBTAT000
12725603	0.0037508	0.0427	0.66	SPAG1	ENSBTAT00000046176 // SPAG1 // sperm associated antigen 1 // --- // --- /// XM_00270124
12822250	0.0038667	0.0433	0.66	MCMBP	NM_001098974 // MCMBP // minichromosome maintenance complex binding protein // --- // 5
12725393	0.0039618	0.0438	0.66	SNAI2	NM_001034538 // SNAI2 // snail homolog 2 (Drosophila) // --- // 520631 /// ENSBTAT00000
12894200	0.0043388	0.0459	0.66	TEX10	NM_001046262 // TEX10 // testis expressed 10 // --- // 522819 /// BC112672 // TEX10 //
12722327	0.0045159	0.0468	0.66	TSTA3	NM_001046139 // TSTA3 // tissue specific transplantation antigen P35B // --- // 513158
12758260	0.004872	0.0487	0.66	PAF1	ENSBTAT00000027224 // PAF1 // Paf1, RNA polymerase II associated factor, homolog (S. ce
12782027	0.004893	0.0487	0.66	WDR75	ENSBTAT00000003908 // WDR75 // WD repeat domain 75 // --- // 521240 /// NM_001102062 //
12910390	0.0049749	0.0492	0.66	TCEAL8	NM_001077116 // TCEAL8 // transcription elongation factor A (SII)-like 8 // --- // 7680
12862219	0.0050099	0.0493	0.66	SLC2A13	NM_001192963 // SLC2A13 // solute carrier family 2 (facilitated glucose transporter), m
12897211	0.0052118	0.0503	0.66	AKAP12	XM_002690338 // AKAP12 // A kinase (PRKA) anchor protein 12 // --- // 513774 /// XM_591
12759116	0.005296	0.0506	0.66	POLR2I	ENSBTAT00000019969 // POLR2I // polymerase (RNA) II (DNA directed) polypeptide I, 14.5k
12711207	0.0054507	0.0514	0.66	RASA3	ENSBTAT00000026598 // RASA3 // RAS p21 protein activator 3 // --- // 282532 /// NM_1746
12803704	0.0055075	0.0515	0.66	RAB23	NM_001206906 // RAB23 // RAB23, member RAS oncogene family // --- // 618588 /// ENSBTAT
12861950	0.0056923	0.0522	0.66	RARG	NM_001130756 // RARG // retinoic acid receptor, gamma // --- // 540425 /// ENSBTAT00000
12766958	0.0057444	0.0524	0.66	GAA	NM_173913 // GAA // glucosidase, alpha; acid // --- // 280798 /// ENSBTAT00000021325 //
12853419	0.0061096	0.0539	0.66	BLVRA	NM_001097571 // BLVRA // biliverdin reductase A // --- // 504596 /// ENSBTAT00000017850
12774318	0.0066431	0.0564	0.66	DES	NM_001081575 // DES // desmin // --- // 280765 /// ENSBTAT00000007041 // DES // desmin
12733572	0.006858	0.0574	0.66	THYN1	NM_001076422 // THYN1 // thymocyte nuclear protein 1 // --- // 616441 /// ENSBTAT000000
12906044	0.007039	0.0581	0.66
12707830	0.007163	0.0584	0.66	MED22	ENSBTAT00000015357 // MED22 // mediator complex subunit 22 // --- // 613736 /// NM_0010
12746240	0.0071979	0.0586	0.66	UNG	NM_001075513 // UNG // uracil-DNA glycosylase // --- // 511381 /// ENSBTAT00000045245 /
12750583	0.0072743	0.059	0.66	CLASRP	NM_001077887 // CLASRP // CLK4-associating serine/arginine rich protein // --- // 50920
12885652	0.0077602	0.061	0.66	KLF16	ENSBTAT00000064075 // KLF16 // Kruppel-like factor 16 // --- // 519163
12676459	0.0080458	0.0621	0.66
12864766	0.0080711	0.0623	0.66	KRT18	NM_001192095 // KRT18 // keratin 18 // --- // 506480 /// ENSBTAT00000001988 // KRT18 //
12718608	0.0084722	0.0638	0.66	PPDPF	NM_001075294 // PPDPF // pancreatic progenitor cell differentiation and proliferation f
12757420	0.0094936	0.0676	0.66	ZNF331	NM_001103251 // ZNF331 // zinc finger protein 331 // --- // 516156 /// ENSBTAT000000219
12776414	0.010556	0.0718	0.66	IMP4	NM_001075617 // IMP4 // IMP4, U3 small nucleolar ribonucleoprotein, homolog (yeast) //
12816588	0.0110592	0.0734	0.66	CLCN7	NM_001025331 // CLCN7 // chloride channel 7 // --- // 513545 /// ENSBTAT00000021122 //
12821842	0.0116924	0.0758	0.66	SFXN4	NM_001035060 // SFXN4 // sideroflexin 4 // --- // 508473 /// ENSBTAT00000011502 // SFXN
12869575	0.0119796	0.0768	0.66	LOC100299277	XM_002683631 // LOC100299277 // uncharacterized LOC100299277 // --- // 100299277
12827219	0.0129837	0.0805	0.66	DDX21	NM_001083527 // DDX21 // DEAD (Asp-Glu-Ala-Asp) box polypeptide 21 // --- // 781917 ///
12722222	0.0129876	0.0805	0.66	RRS1	NM_001075481 // RRS1 // RRS1 ribosome biogenesis regulator homolog (S. cerevisiae) // -
12787593	0.0143778	0.0851	0.66	SKP2	NM_001102052 // SKP2 // S-phase kinase-associated protein 2 (p45) // --- // 519018 ///
12699408	0.0178771	0.0958	0.66	DNM1	NM_001076820 // DNM1 // dynamin 1 // --- // 508794 /// ENSBTAT00000032743 // DNM1 // dy
12821158	0.0217767	0.107	0.66	PIK3AP1	XM_001790272 // PIK3AP1 // phosphoinositide-3-kinase adaptor protein 1 // --- // 100138
12842499	0.0238664	0.113	0.66	LOC100337178	ENSBTAT00000011602 // LOC100337178 // polypyrimidine tract binding protein 2-like // --
12902845	0.0259902	0.118	0.66	HPRT1	NM_001034035 // HPRT1 // hypoxanthine phosphoribosyltransferase 1 // --- // 281229 ///
12675403	0.0261611	0.119	0.66
12726800	0.0309645	0.13	0.66	NCAM1	NM_174399 // NCAM1 // neural cell adhesion molecule 1 // --- // 281941 /// ENSBTAT00000
12709549	0.0331924	0.135	0.66	ATP11A	ENSBTAT00000045151 // ATP11A // ATPase, class VI, type 11A // --- // 512547
12676985	0.0341576	0.137	0.66
12736229	0.0352757	0.139	0.66	MXRA8	NM_001075830 // MXRA8 // matrix-remodelling associated 8 // --- // 522392 /// ENSBTAT00
12911903	0.0381608	0.145	0.66
12889755	0.0389608	0.147	0.66	FREM1	NM_001192995 // FREM1 // FRAS1 related extracellular matrix 1 // --- // 508018 /// ENSB
12871770	0.0446472	0.158	0.66	LEF1	NM_001192856 // LEF1 // lymphoid enhancer-binding factor 1 // --- // 535399 /// ENSBTAT
12776855	0.0498645	0.168	0.66
12823743	0.0009648	0.0246	0.65	EIF4EBP1	NM_001077893 // EIF4EBP1 // eukaryotic translation initiation factor 4E binding protein
12795759	0.0009884	0.0248	0.65	FOXP1	NM_001083689 // FOXP1 // forkhead box P1 // --- // 515903 /// ENSBTAT00000021993 // FOX
12879520	0.0009935	0.0249	0.65	PCDHGA8	NM_001099705 // PCDHGA8 // protocadherin gamma subfamily A, 8 // --- // 521340 /// ENSB
12743482	0.0010149	0.0249	0.65	SNAP29	NM_001075959 // SNAP29 // synaptosomal-associated protein, 29kDa // --- // 532261 /// E
12755996	0.0010248	0.0249	0.65	RTN2	ENSBTAT00000043635 // RTN2 // reticulon 2 // --- // 359720 /// NM_001113260 // RTN2 //
12685396	0.0010298	0.0249	0.65	RUNX1	NM_001256578 // RUNX1 // runt-related transcription factor 1 // --- // 529631 /// ENSBT
12862398	0.0011018	0.0256	0.65	CRADD	NM_001083773 // CRADD // CASP2 and RIPK1 domain containing adaptor with death domain //
12698638	0.0011025	0.0256	0.65	STXBP1	ENSBTAT00000004589 // STXBP1 // syntaxin binding protein 1 // --- // 282378 /// NM_1746
12703271	0.0011518	0.0259	0.65	CAMKMT	NM_001105641 // CAMKMT // calmodulin-lysine N-methyltransferase // --- // 786620 /// EN
12838910	0.0011935	0.0263	0.65	VAV3	DQ125496 // VAV3 // vav 3 guanine nucleotide exchange factor // --- // 521961
12809155	0.0012376	0.0265	0.65	FECH	ENSBTAT00000008384 // FECH // ferrochelatase // --- // 281158 /// ENSBTAT00000008384 //
12691613	0.0012549	0.0268	0.65	RFX7	NM_001192820 // RFX7 // regulatory factor X, 7 // --- // 541058 /// ENSBTAT00000000738
12767454	0.0012737	0.027	0.65	SLC6A4	NM_174609 // SLC6A4 // solute carrier family 6 (neurotransmitter transporter, serotonin
12840580	0.0012794	0.0271	0.65	ETV3	NM_001205609 // ETV3 // ets variant 3 // --- // 538995 /// ENSBTAT00000011404 // ETV3 /
12686574	0.0013837	0.0278	0.65	PTX3	NM_001076259 // PTX3 // pentraxin 3, long // --- // 541148 /// ENSBTAT00000011863 // PT
12875066	0.0013879	0.0279	0.65	ADAMTS3	NM_001192797 // ADAMTS3 // ADAM metallopeptidase with thrombospondin type 1 motif, 3 //
12852299	0.0013975	0.0279	0.65	ZYX	NM_001078101 // ZYX // zyxin // --- // 768226 /// ENSBTAT00000023912 // ZYX // zyxin //
12687032	0.001414	0.028	0.65	PTTG1IP	NM_001046594 // PTTG1IP // pituitary tumor-transforming 1 interacting protein // --- //
12676415	0.0014278	0.0281	0.65
12681790	0.0014443	0.0281	0.65	GOLIM4	NM_001205553 // GOLIM4 // golgi integral membrane protein 4 // --- // 538532 /// ENSBTA
12817180	0.0015356	0.0286	0.65	CUX1	BC105546 // CUX1 // cut-like homeobox 1 // --- // 523683
12710815	0.0015422	0.0286	0.65	N6AMT2	NM_001080349 // N6AMT2 // N-6 adenine-specific DNA methyltransferase 2 (putative) // --
12888223	0.0016014	0.0289	0.65	B3GNT3	NM_001098473 // B3GNT3 // UDP-GlcNAc:betaGal beta-1,3-N-acetylglucosaminyltransferase 3
12781058	0.0016356	0.0292	0.65	SESN2	NM_001024507 // SESN2 // sestrin 2 // --- // 509863 /// ENSBTAT00000063922 // SESN2 //
12913475	0.0016937	0.0298	0.65
12843638	0.0017117	0.0299	0.65	POLR3C	NM_001038511 // POLR3C // polymerase (RNA) III (DNA directed) polypeptide C (62kD) // -
12739578	0.0017347	0.03	0.65	IVNS1ABP	NM_001046184 // IVNS1ABP // influenza virus NS1A binding protein // --- // 514940 /// B
12878376	0.0017586	0.0302	0.65	ISYNA1	NM_001046032 // ISYNA1 // inositol-3-phosphate synthase 1 // --- // 509394 /// ENSBTAT0
12728506	0.0017682	0.0303	0.65	RNF169	XM_002693463 // RNF169 // ring finger protein 169 // --- // 525756 /// ENSBTAT000000009
12744597	0.0018268	0.0306	0.65	CTSO	ENSBTAT00000014691 // CTSO // cathepsin O // --- // 616804
12887137	0.0018551	0.0308	0.65	ZNF555	NM_001082449 // ZNF555 // zinc finger protein 555 // --- // 538773 /// ENSBTAT000000110
12763212	0.00187	0.0309	0.65	WDR81	BC153247 // WDR81 // WD repeat domain 81 // --- // 514104 /// ENSBTAT00000015274 // WDR
12760151	0.0019115	0.0311	0.65	ZNF583	NM_001083534 // ZNF583 // zinc finger protein 583 // --- // 789836 /// ENSBTAT000000534
12853503	0.0019208	0.0312	0.65	SRPK2	ENSBTAT00000061045 // SRPK2 // SRSF protein kinase 2 // --- // 505945 /// BC118372 // S
12721144	0.0019815	0.0317	0.65	PDRG1	NM_001078115 // PDRG1 // p53 and DNA-damage regulated 1 // --- // 768241 /// ENSBTAT000
12707032	0.0020134	0.0319	0.65	HNRPLL	NM_001076900 // HNRPLL // heterogeneous nuclear ribonucleoprotein L-like // --- // 5343
12879248	0.0020182	0.0319	0.65	TIMM13	NM_001080277 // TIMM13 // translocase of inner mitochondrial membrane 13 homolog (yeast
12750723	0.0020749	0.0322	0.65	NIP7	NM_001192239 // NIP7 // nuclear import 7 homolog (S. cerevisiae) // --- // 509981 /// E
12824920	0.0021072	0.0325	0.65	FUT10	NM_182987 // FUT10 // fucosyltransferase 10 (alpha (1,3) fucosyltransferase) // --- //
12805572	0.0021119	0.0326	0.65	BAK1	NM_001077918 // BAK1 // BCL2-antagonist/killer 1 // --- // 514090 /// ENSBTAT0000000054
12780277	0.0021554	0.033	0.65	INPP1	ENSBTAT00000009977 // INPP1 // inositol polyphosphate-1-phosphatase // --- // 281869 //
12720110	0.0022161	0.0336	0.65	PREX1	ENSBTAT00000043215 // PREX1 // phosphatidylinositol-3,4,5-trisphosphate-dependent Rac e
12824387	0.0022415	0.0338	0.65	LOC535434	ENSBTAT00000011697 // LOC535434 // storkhead-box protein 2-like // --- // 535434
12803431	0.002254	0.0338	0.65	KLHDC3	NM_001014966 // KLHDC3 // kelch domain containing 3 // --- // 541138 /// ENSBTAT0000001
12780828	0.0022803	0.034	0.65	CNPPD1	NM_001015538 // CNPPD1 // cyclin Pas1/PHO80 domain containing 1 // --- // 507473 /// EN
12819589	0.0024752	0.0352	0.65	SFXN2	NM_001034446 // SFXN2 // sideroflexin 2 // --- // 513450 /// ENSBTAT00000005659 // SFXN
12786378	0.0025774	0.0358	0.65	MSX2	ENSBTAT00000018417 // MSX2 // msh homeobox 2 // --- // 540230 /// NM_001079614 // MSX2
12712008	0.0026455	0.0362	0.65	PAN3	BC126640 // PAN3 // PAN3 poly(A) specific ribonuclease subunit homolog (S. cerevisiae)
12694716	0.0027931	0.0371	0.65	TLE3	NM_001193206 // TLE3 // transducin-like enhancer of split 3 (E(sp1) homolog, Drosophila
12867867	0.0030942	0.039	0.65	TTLL1	NM_001076171 // TTLL1 // tubulin tyrosine ligase-like family, member 1 // --- // 539530
12893820	0.003258	0.0399	0.65	RFK	BC102762 // RFK // riboflavin kinase // --- // 514697 /// ENSBTAT00000025762 // RFK //
12787027	0.0035704	0.0418	0.65
12889145	0.0036666	0.0422	0.65	PSIP1	NM_001206476 // PSIP1 // PC4 and SFRS1 interacting protein 1 // --- // 282011 /// ENSBT
12893422	0.0036908	0.0424	0.65	SLC46A2	ENSBTAT00000018168 // SLC46A2 // solute carrier family 46, member 2 // --- // 511556 //
12914771	0.0038878	0.0434	0.65
12880370	0.0039909	0.044	0.65	PCDHGB4	NM_001102513 // PCDHGB4 // protocadherin gamma subfamily B, 4 // --- // 532241 /// ENSB
12807909	0.0040687	0.0445	0.65	EMILIN2	ENSBTAT00000005074 // EMILIN2 // elastin microfibril interfacer 2 // --- // 514291 ///
12915067	0.0040734	0.0445	0.65
12847867	0.0045192	0.0468	0.65	RNPC3	NM_001077117 // RNPC3 // RNA-binding region (RNP1, RRM) containing 3 // --- // 768060 /
12913477	0.0045333	0.0468	0.65
12720228	0.0045958	0.0472	0.65	KIF16B	XM_002692044 // KIF16B // kinesin family member 16B // --- // 532276 /// ENSBTAT0000000
12808817	0.0047276	0.0478	0.65	KCTD1	NM_001080360 // KCTD1 // potassium channel tetramerisation domain containing 1 // --- /
12817335	0.0050405	0.0495	0.65	ADCY9	NM_001205917 // ADCY9 // adenylate cyclase 9 // --- // 525482 /// ENSBTAT00000022120 //
12676421	0.0052574	0.0504	0.65
12676891	0.0059517	0.0532	0.65
12808537	0.0061505	0.054	0.65	PARD6G	NM_001098100 // PARD6G // par-6 partitioning defective 6 homolog gamma (C. elegans) //
12721596	0.0061713	0.0541	0.65	HAS2	NM_174079 // HAS2 // hyaluronan synthase 2 // --- // 281220 /// ENSBTAT00000026503 // L
12823868	0.0065063	0.0557	0.65	ODZ3	NM_001205307 // ODZ3 // odz, odd Oz/ten-m homolog 3 (Drosophila) // --- // 511615 /// E
12798786	0.0071005	0.0583	0.65	MCM2	ENSBTAT00000019121 // MCM2 // minichromosome maintenance complex component 2 // --- //
12890269	0.0073645	0.0594	0.65	UGCG	NM_001076850 // UGCG // UDP-glucose ceramide glucosyltransferase // --- // 514357 /// E
12880677	0.0074859	0.0599	0.65	MRI1	NM_001046387 // MRI1 // methylthioribose-1-phosphate isomerase homolog (S. cerevisiae)
12712968	0.0078339	0.0613	0.65	KCTD12	XM_868438 // KCTD12 // potassium channel tetramerisation domain containing 12 // --- //
12679384	0.0084434	0.0637	0.65	PRMT2	NM_001024495 // PRMT2 // protein arginine methyltransferase 2 // --- // 507839 /// ENSB
12707908	0.0085484	0.0641	0.65	FANCL	NM_001076332 // FANCL // Fanconi anemia, complementation group L // --- // 614512 /// E
12848368	0.0093771	0.0671	0.65	SLAMF7	NM_001191358 // SLAMF7 // SLAM family member 7 // --- // 790164 /// HQ728435 // SLAMF7
12810843	0.0123214	0.0779	0.65	ZNF75A	NM_001109965 // ZNF75A // zinc finger protein 75a // --- // 100126179 /// ENSBTAT000000
12729795	0.0131929	0.0811	0.65	C15H11orf31	NM_001164092 // C15H11orf31 // chromosome 15 open reading frame, human C11orf31 // ---
12894888	0.0132096	0.0811	0.65	C8H9orf41	ENSBTAT00000010790 // C8H9orf41 // chromosome 8 open reading frame, human C9orf41 // --
12676847	0.0143643	0.0851	0.65
12676693	0.0146021	0.0859	0.65
12730893	0.0152585	0.0883	0.65
12676791	0.0158864	0.0901	0.65
12897625	0.016576	0.0924	0.65	FYN	NM_001077972 // FYN // FYN oncogene related to SRC, FGR, YES // --- // 527263 /// ENSBT
12702679	0.0195064	0.101	0.65	ANTXR1	NM_001206228 // ANTXR1 // anthrax toxin receptor 1 // --- // 616010 /// ENSBTAT00000061
12749751	0.0203706	0.103	0.65	C5AR1	ENSBTAT00000027807 // C5AR1 // complement component 5a receptor 1 // --- // 493645 ///
12787409	0.0218553	0.107	0.65	LCP2	NM_001076844 // LCP2 // lymphocyte cytosolic protein 2 (SH2 domain containing leukocyte
12826845	0.0241463	0.113	0.65	BICC1	XM_617983 // BICC1 // bicaudal C homolog 1 (Drosophila) // --- // 537799 /// ENSBTAT000
12871296	0.0254784	0.117	0.65	GUF1	NM_001102067 // GUF1 // GUF1 GTPase homolog (S. cerevisiae) // --- // 522459 /// ENSBTA
12754336	0.0300879	0.128	0.65	ZNF566	NM_001077017 // ZNF566 // zinc finger protein 566 // --- // 767945 /// ENSBTAT000000063
12695388	0.0432556	0.156	0.65	ITGA11	ENSBTAT00000011032 // ITGA11 // integrin, alpha 11 // --- // 523755
12913927	0.0435462	0.156	0.65
12759714	0.0480691	0.165	0.65	MAF	NM_001105637 // MAF // v-maf musculoaponeurotic fibrosarcoma oncogene homolog (avian) /
12910145	0.0008363	0.0233	0.64	CHIC1	NM_001206195 // CHIC1 // cysteine-rich hydrophobic domain 1 // --- // 615065 /// ENSBTA
12891606	0.0008509	0.0234	0.64	DAPK1	NM_001206038 // DAPK1 // death-associated protein kinase 1 // --- // 540873 /// ENSBTAT
12843949	0.0008554	0.0234	0.64	HAO2	NM_001035071 // HAO2 // hydroxyacid oxidase 2 (long chain) // --- // 509481 /// ENSBTAT
12890988	0.0008577	0.0234	0.64	C8H9orf3	NM_001206980 // C8H9orf3 // chromosome 8 open reading frame, human C9orf3 // --- // 531
12694383	0.0008959	0.0239	0.64	ABHD4	NM_001034368 // ABHD4 // abhydrolase domain containing 4 // --- // 509896 /// ENSBTAT00
12695121	0.0009235	0.0242	0.64	TEX9	NM_001099006 // TEX9 // testis expressed 9 // --- // 518432 /// ENSBTAT00000044543 // T
12687370	0.0009438	0.0245	0.64	CCDC14	ENSBTAT00000000740 // CCDC14 // coiled-coil domain containing 14 // --- // 786080 /// E
12778496	0.000955	0.0245	0.64	NIPA1	ENSBTAT00000002985 // NIPA1 // non imprinted in Prader-Willi/Angelman syndrome 1 // ---
12821255	0.0009759	0.0247	0.64	C26H10orf76	ENSBTAT00000017436 // C26H10orf76 // chromosome 26 open reading frame, human C10orf76 /
12786334	0.0010225	0.0249	0.64	FAM134B	NM_001015672 // FAM134B // family with sequence similarity 134, member B // --- // 5400
12851048	0.0010771	0.0253	0.64	DOCK4	ENSBTAT00000033728 // DOCK4 // dedicator of cytokinesis 4 // --- // 534227
12741333	0.0011212	0.0257	0.64	FBLIM1	NM_001076955 // FBLIM1 // filamin binding LIM protein 1 // --- // 767833 /// ENSBTAT000
12800098	0.0011271	0.0257	0.64	ZNF445	NM_001205819 // ZNF445 // zinc finger protein 445 // --- // 540408 /// ENSBTAT000000656
12908310	0.0011621	0.026	0.64	ZNF674	NM_001102010 // ZNF674 // zinc finger family member 674 // --- // 514769 /// ENSBTAT000
12699857	0.0012259	0.0265	0.64	ITGB1BP1	ENSBTAT00000017362 // ITGB1BP1 // integrin beta 1 binding protein 1 // --- // 513531 //
12788957	0.0012263	0.0265	0.64	LOC100337482	XM_002696530 // LOC100337482 // A-kinase anchor protein 13-like // --- // 100337482
12765078	0.0012664	0.0269	0.64	TUBG2	NM_001037615 // TUBG2 // tubulin, gamma 2 // --- // 540216 /// ENSBTAT00000042847 // TU
12829681	0.0013329	0.0275	0.64	CST6	ENSBTAT00000019583 // CST6 // cystatin E/M // --- // 503685
12826366	0.0013691	0.0278	0.64	ZNF33B	NM_001075810 // ZNF33B // zinc finger protein 33B // --- // 520684 /// ENSBTAT000000243
12688156	0.0014621	0.0282	0.64	ANXA2	NM_174716 // ANXA2 // annexin A2 // --- // 282689 /// ENSBTAT00000012655 // ANXA2 // an
12854769	0.001537	0.0286	0.64	EPHA1	NM_001144095 // EPHA1 // EPH receptor A1 // --- // 525946 /// ENSBTAT00000008354 // EPH
12840499	0.0015491	0.0286	0.64	HEYL	NM_001024565 // HEYL // hairy/enhancer-of-split related with YRPW motif-like // --- //
12712341	0.0015555	0.0286	0.64	SLC25A15	ENSBTAT00000015468 // SLC25A15 // solute carrier family 25 (mitochondrial carrier; orni
12865819	0.0015746	0.0288	0.64	PRPF40B	ENSBTAT00000022067 // PRPF40B // PRP40 pre-mRNA processing factor 40 homolog B (S. cere
12721237	0.0015842	0.0288	0.64	JAG1	NM_001191178 // JAG1 // jagged 1 // --- // 783681 /// ENSBTAT00000009631 // JAG1 // jag
12808867	0.001673	0.0296	0.64
12902909	0.0017384	0.03	0.64	TIMP1	NM_174471 // TIMP1 // TIMP metallopeptidase inhibitor 1 // --- // 282092 /// ENSBTAT000
12884026	0.0017484	0.0301	0.64	LOC506645	ENSBTAT00000026306 // LOC506645 // ubiquitin associated protein 2-like pseudogene // --
12895239	0.0017729	0.0303	0.64	UHRF2	NM_001102270 // UHRF2 // ubiquitin-like with PHD and ring finger domains 2 // --- // 61
12803053	0.0018377	0.0307	0.64	MAPK13	ENSBTAT00000013198 // MAPK13 // mitogen-activated protein kinase 13 // --- // 535327 //
12887273	0.0019001	0.0311	0.64	C7H5orf54	NM_001098107 // C7H5orf54 // chromosome 7 open reading frame, human C5orf54 // --- // 5
12911543	0.0020116	0.0319	0.64
12825057	0.0020528	0.032	0.64	RNF122	NM_001101920 // RNF122 // ring finger protein 122 // --- // 510037 /// ENSBTAT000000218
12691723	0.002221	0.0336	0.64	ISCA2	NM_001038683 // ISCA2 // iron-sulfur cluster assembly 2 homolog (S. cerevisiae) // ---
12717971	0.0023196	0.0342	0.64	CST3	ENSBTAT00000000790 // CST3 // cystatin C // --- // 281102 /// NM_174029 // CST3 // cyst
12764643	0.0023284	0.0342	0.64	USP32	XM_864292 // USP32 // ubiquitin specific peptidase 32 // --- // 537257
12893646	0.0023514	0.0343	0.64
12864109	0.0024921	0.0353	0.64	CACNB3	NM_174509 // CACNB3 // calcium channel, voltage-dependent, beta 3 subunit // --- // 282
12833713	0.002746	0.0367	0.64	ZDHHC13	NM_001206141 // ZDHHC13 // zinc finger, DHHC-type containing 13 // --- // 514176 /// EN
12853265	0.0028084	0.0371	0.64	SGCE	ENSBTAT00000028355 // SGCE // sarcoglycan, epsilon // --- // 407209 /// NM_001075145 //
12739306	0.0028181	0.0372	0.64	ABL2	NM_001143855 // ABL2 // v-abl Abelson murine leukemia viral oncogene homolog 2 // --- /
12863463	0.0029087	0.0378	0.64	MUC19	ENSBTAT00000053054 // MUC19 // mucin 19 // --- // 100140959
12764767	0.0031845	0.0395	0.64	DGKE	NM_001192930 // DGKE // diacylglycerol kinase, epsilon 64kDa // --- // 538147 /// ENSBT
12820218	0.0032469	0.0398	0.64	PCGF5	NM_001077980 // PCGF5 // polycomb group ring finger 5 // --- // 528946 /// ENSBTAT00000
12697953	0.0032969	0.0402	0.64	CNNM3	XM_002691165 // CNNM3 // cyclin M3 // --- // 100138153 /// ENSBTAT00000014394 // CNNM3
12806044	0.0034055	0.0409	0.64	ZNF451	NM_001192684 // ZNF451 // zinc finger protein 451 // --- // 529894 /// ENSBTAT000000251
12911099	0.0034821	0.0412	0.64
12803619	0.0039234	0.0436	0.64	CCDC90A	NM_001102309 // CCDC90A // coiled-coil domain containing 90A // --- // 617129 /// ENSBT
12715771	0.0041566	0.0449	0.64	GZF1	XM_002692163 // GZF1 // GDNF-inducible zinc finger protein 1 // --- // 525199 /// ENSBT
12772551	0.0042416	0.0454	0.64
12863203	0.0043186	0.0458	0.64	C5H12orf63	ENSBTAT00000043356 // C5H12orf63 // chromosome 5 open reading frame, human C12orf63 //
12781773	0.0044428	0.0464	0.64	CEP85	XM_002685702 // CEP85 // centrosomal protein 85kDa // --- // 517520 /// ENSBTAT00000012
12754423	0.0044662	0.0465	0.64	ATMIN	NM_001205413 // ATMIN // ATM interactor // --- // 781217 /// ENSBTAT00000010797 // ATMI
12883993	0.0045158	0.0468	0.64	GCDH	NM_001045939 // GCDH // glutaryl-CoA dehydrogenase // --- // 506310 /// ENSBTAT00000045
12678119	0.0045736	0.047	0.64
12720374	0.0047435	0.0479	0.64	ANKRD26	NM_001113767 // ANKRD26 // ankyrin repeat domain 26 // --- // 533620 /// ENSBTAT0000002
12914473	0.0048123	0.0483	0.64
12789506	0.0050142	0.0494	0.64	PDE8A	NM_001191455 // PDE8A // phosphodiesterase 8A // --- // 506787 /// ENSBTAT00000021155 /
12829728	0.0053115	0.0507	0.64	NARS2	NM_001098867 // NARS2 // asparaginyl-tRNA synthetase 2, mitochondrial (putative) // ---
12873881	0.0055114	0.0515	0.64	ANTXR2	NM_001076826 // ANTXR2 // anthrax toxin receptor 2 // --- // 510080 /// ENSBTAT00000019
12704097	0.0055794	0.0518	0.64	LOC100296311	ENSBTAT00000024678 // LOC100296311 // cytochrome c oxidase subunit 5B, mitochondrial-li
12706838	0.0057604	0.0524	0.64	TSC1	BT021605 // TSC1 // tuberous sclerosis 1 // --- // 533440 /// ENSBTAT00000006842 // TSC
12700287	0.0058046	0.0527	0.64	FBXW5	NM_001192469 // FBXW5 // F-box and WD repeat domain containing 5 // --- // 517357 /// E
12831846	0.0058097	0.0527	0.64
12779976	0.0059803	0.0533	0.64	MIR2352	NR_031078 // MIR2352 // microRNA mir-2352 // --- // 100313160
12895413	0.0061576	0.054	0.64	AAED1	NM_001076436 // AAED1 // AhpC/TSA antioxidant enzyme domain containing 1 // --- // 6168
12775590	0.0066707	0.0565	0.64	AIM1L	NM_001109791 // AIM1L // absent in melanoma 1-like // --- // 507142 /// ENSBTAT00000037
12915395	0.0070488	0.0581	0.64
12886948	0.0072719	0.059	0.64	SLC27A6	NM_001101169 // SLC27A6 // solute carrier family 27 (fatty acid transporter), member 6
12915017	0.0075667	0.0602	0.64
12803265	0.0079719	0.0619	0.64	LOC539875	XM_590015 // LOC539875 // histone cluster 1, H3a-like // --- // 539875 /// ENSBTAT00000
12900794	0.0083191	0.0632	0.64	PARK2	NM_001199065 // PARK2 // parkinson protein 2, E3 ubiquitin protein ligase (parkin) // -
12843050	0.0086843	0.0647	0.64	WNT2B	NM_001099363 // WNT2B // wingless-type MMTV integration site family, member 2B // --- /
12915405	0.0090105	0.0658	0.64
12876963	0.0093651	0.0671	0.64	ICAM1	ENSBTAT00000013608 // ICAM1 // intercellular adhesion molecule 1 // --- // 281839
12697204	0.0099403	0.0694	0.64	RNASE4	NM_001040590 // RNASE4 // ribonuclease, RNase A family, 4 // --- // 616089
12854547	0.0101294	0.0701	0.64	PHTF2	NM_001191316 // PHTF2 // putative homeodomain transcription factor 2 // --- // 520774 /
12699935	0.0106314	0.072	0.64	E2F6	NM_001076848 // E2F6 // E2F transcription factor 6 // --- // 514085 /// ENSBTAT00000028
12702658	0.0109764	0.0731	0.64	NELF	XM_002691691 // NELF // nasal embryonic LHRH factor // --- // 615854 /// ENSBTAT0000001
12891722	0.0120472	0.077	0.64	GNG10	NM_001114512 // GNG10 // guanine nucleotide binding protein (G protein), gamma 10 // --
12676755	0.0130438	0.0807	0.64
12867705	0.0135367	0.0824	0.64	RIMKLB	NM_001076113 // RIMKLB // ribosomal modification protein rimK-like family member B // -
12829065	0.0141869	0.0845	0.64	IRF7	NM_001105040 // IRF7 // interferon regulatory factor 7 // --- // 100125591 /// ENSBTAT0
12774353	0.0151695	0.0879	0.64
12795470	0.0220495	0.108	0.64	ITIH4	NM_001015590 // ITIH4 // inter-alpha-trypsin inhibitor heavy chain family, member 4 //
12798271	0.026881	0.12	0.64	CCR5	NM_001011672 // CCR5 // chemokine (C-C motif) receptor 5 // --- // 497017 /// ENSBTAT00
12734902	0.0269635	0.121	0.64	SOAT1	NM_001034206 // SOAT1 // sterol O-acyltransferase 1 // --- // 504287 /// ENSBTAT0000003
12676611	0.0290037	0.126	0.64
12676795	0.0323017	0.133	0.64
12829596	0.0329733	0.134	0.64	CTSC	NM_001033617 // CTSC // cathepsin C // --- // 352958 /// ENSBTAT00000014735 // CTSC //
12676035	0.0341458	0.137	0.64
12821247	0.0356096	0.14	0.64	MIR1287	NR_030886 // MIR1287 // microRNA mir-1287 // --- // 100313110 /// NM_001034532 // PYROX
12823457	0.044594	0.158	0.64	MSR1	NM_001113240 // MSR1 // macrophage scavenger receptor 1 // --- // 281311 /// ENSBTAT000
12836813	0.0475901	0.164	0.64	IQGAP3	NM_001098880 // IQGAP3 // IQ motif containing GTPase activating protein 3 // --- // 505
12676735	0.0479611	0.164	0.64
12795307	0.0006716	0.0216	0.63	UBE2D4	ENSBTAT00000005220 // UBE2D4 // ubiquitin-conjugating enzyme E2D 4 (putative) // --- //
12878366	0.0007036	0.022	0.63	TSPAN17	NM_001014880 // TSPAN17 // tetraspanin 17 // --- // 509386 /// ENSBTAT00000023198 // TS
12747400	0.0007296	0.0221	0.63	PRKAB1	NM_001024558 // PRKAB1 // protein kinase, AMP-activated, beta 1 non-catalytic subunit /
12776754	0.0007359	0.0222	0.63	TRIM62	NM_001205835 // TRIM62 // tripartite motif containing 62 // --- // 516886 /// ENSBTAT00
12818076	0.0007548	0.0222	0.63	ZNF689	NM_001083746 // ZNF689 // zinc finger protein 689 // --- // 539836 /// ENSBTAT000000183
12752408	0.0008092	0.023	0.63	MARK4	NM_001035359 // MARK4 // MAP/microtubule affinity-regulating kinase 4 // --- // 525675
12808998	0.0008104	0.023	0.63	LAMA3	ENSBTAT00000060991 // LAMA3 // laminin, alpha 3 // --- // 100336873
12749627	0.0008384	0.0233	0.63	FCGRT	NM_176657 // FCGRT // Fc fragment of IgG, receptor, transporter, alpha // --- // 338062
12733269	0.0008813	0.0237	0.63	PGAP2	ENSBTAT00000011097 // PGAP2 // post-GPI attachment to proteins 2 // --- // 540520 /// N
12884252	0.0009191	0.0242	0.63	DOCK6	NM_001192166 // DOCK6 // dedicator of cytokinesis 6 // --- // 508023 /// ENSBTAT0000001
12747177	0.0009251	0.0242	0.63	RNF215	XM_002707703 // RNF215 // ring finger protein 215 // --- // 530174 /// ENSBTAT000000044
12827018	0.0009459	0.0245	0.63	GPR137B	NM_001191481 // GPR137B // G protein-coupled receptor 137B // --- // 613826 /// ENSBTAT
12808638	0.0009712	0.0247	0.63	CTIF	XM_002697762 // CTIF // CBP80/20-dependent translation initiation factor // --- // 6151
12753402	0.0009817	0.0247	0.63	ZNF432	NM_001192232 // ZNF432 // zinc finger protein 432 // --- // 539365 /// ENSBTAT000000318
12752595	0.0010285	0.0249	0.63	PPM1N	NM_001102128 // PPM1N // protein phosphatase, Mg2+/Mn2+ dependent, 1N (putative) // ---
12891431	0.0011421	0.0258	0.63	GLIPR2	ENSBTAT00000000086 // GLIPR2 // GLI pathogenesis-related 2 // --- // 538565 /// NM_0010
12834940	0.0012089	0.0264	0.63	NUDT8	NM_001101255 // NUDT8 // nudix (nucleoside diphosphate linked moiety X)-type motif 8 //
12894567	0.0012668	0.0269	0.63	DFNB31	ENSBTAT00000013333 // DFNB31 // deafness, autosomal recessive 31 // --- // ---
12889914	0.0012962	0.0272	0.63	SMC5	BC122734 // SMC5 // structural maintenance of chromosomes 5 // --- // 508938
12721605	0.0015041	0.0285	0.63	FABP5	NM_174315 // FABP5 // fatty acid binding protein 5 (psoriasis-associated) // --- // 281
12884503	0.0015534	0.0286	0.63	PPP2R2B	NM_001014879 // PPP2R2B // protein phosphatase 2, regulatory subunit B, beta // --- //
12838386	0.0015893	0.0288	0.63	SNED1	ENSBTAT00000018790 // SNED1 // sushi, nidogen and EGF-like domains 1 // --- // --- ///
12788266	0.001677	0.0296	0.63	FCHO2	NM_001098119 // FCHO2 // FCH domain only 2 // --- // 540808 /// ENSBTAT00000023322 // F
12884325	0.0016948	0.0298	0.63	SSBP4	NM_001035273 // SSBP4 // single stranded DNA binding protein 4 // --- // 508156 /// ENS
12829936	0.0017438	0.0301	0.63	SLC37A2	NM_001024486 // SLC37A2 // solute carrier family 37 (glycerol-3-phosphate transporter),
12708674	0.00179	0.0304	0.63	HK2	XM_002691189 // HK2 // hexokinase 2 // --- // 788926 /// XM_001255831 // HK2 // hexokin
12681481	0.0018074	0.0305	0.63	LOC534360	ENSBTAT00000032332 // LOC534360 // poliovirus receptor-related 3-like // --- // 534360
12773413	0.0019548	0.0315	0.63	RNF43	NM_001191194 // RNF43 // ring finger protein 43 // --- // 784035
12723646	0.002076	0.0322	0.63	NIPAL2	BC149098 // NIPAL2 // NIPA-like domain containing 2 // --- // 781492
12674983	0.002162	0.033	0.63
12766779	0.0023282	0.0342	0.63	KAT2A	ENSBTAT00000061193 // KAT2A // K(lysine) acetyltransferase 2A // --- // ---
12914095	0.0025548	0.0358	0.63
12766049	0.0025625	0.0358	0.63	NLGN2	NM_001191242 // NLGN2 // neuroligin 2 // --- // 787986 /// ENSBTAT00000026987 // NLGN2
12885460	0.002744	0.0367	0.63	GAMT	NM_001038544 // GAMT // guanidinoacetate N-methyltransferase // --- // 515270 /// ENSBT
12858031	0.0028255	0.0373	0.63	CTDSP2	NM_001045935 // CTDSP2 // CTD (carboxy-terminal domain, RNA polymerase II, polypeptide
12741577	0.0030545	0.0388	0.63	PRDM2	ENSBTAT00000027387 // PRDM2 // PR domain containing 2, with ZNF domain // --- // 789222
12805578	0.0031434	0.0393	0.63	TCF19	NM_001083684 // TCF19 // transcription factor 19 // --- // 514216 /// ENSBTAT0000001919
12775945	0.0032378	0.0398	0.63	NINJ1	ENSBTAT00000014880 // NINJ1 // ninjurin 1 // --- // 511468 /// ENSBTAT00000014880 // LO
12818629	0.0034479	0.0411	0.63	USP31	XM_002703093 // USP31 // ubiquitin specific peptidase 48 // --- // 786875 /// ENSBTAT00
12825110	0.0034484	0.0411	0.63	PURG	ENSBTAT00000052030 // PURG // purine-rich element binding protein G // --- // 512941
12828374	0.0034729	0.0411	0.63	PCBD1	NM_001206474 // PCBD1 // pterin-4 alpha-carbinolamine dehydratase/dimerization cofactor
12709032	0.0036925	0.0424	0.63	LAMP1	NM_001075124 // LAMP1 // lysosomal-associated membrane protein 1 // --- // 281897 /// E
12796734	0.0040826	0.0446	0.63	EPM2AIP1	XM_591313 // EPM2AIP1 // EPM2A (laforin) interacting protein 1 // --- // 540067
12840292	0.0041092	0.0447	0.63	GBA	NM_001046421 // GBA // glucosidase, beta, acid // --- // 537087 /// ENSBTAT00000019765
12759917	0.004271	0.0456	0.63	GYS1	NM_001101299 // GYS1 // glycogen synthase 1 (muscle) // --- // 786335 /// ENSBTAT000000
12871370	0.0044634	0.0465	0.63	ENOPH1	NM_001075875 // ENOPH1 // enolase-phosphatase 1 // --- // 525563 /// ENSBTAT00000019702
12676869	0.0052969	0.0506	0.63
12693416	0.0054664	0.0514	0.63	DHRS4	ENSBTAT00000023493 // DHRS4 // dehydrogenase/reductase (SDR family) member 4 // --- //
12816911	0.0056092	0.0519	0.63	GPRC5B	NM_001075741 // GPRC5B // G protein-coupled receptor, family C, group 5, member B // --
12746623	0.0057514	0.0524	0.63	NOC4L	XM_002694435 // NOC4L // nucleolar complex associated 4 homolog (S. cerevisiae) // ---
12897888	0.0067267	0.0567	0.63	PEX7	NM_001076890 // PEX7 // peroxisomal biogenesis factor 7 // --- // 533077 /// ENSBTAT000
12800624	0.0071408	0.0584	0.63	GPR27	XM_003587626 // GPR27 // G protein-coupled receptor 27 // --- // 782069
12764056	0.0077932	0.0612	0.63	EVI2A	NM_001034568 // EVI2A // ecotropic viral integration site 2A // --- // 528920 /// ENSBT
12679824	0.0080354	0.0621	0.63	COL6A1	NM_001143865 // COL6A1 // collagen, type VI, alpha 1 // 1q12-q14 // 511422 /// ENSBTAT0
12866766	0.0085137	0.0639	0.63	TEAD4	HQ703511 // TEAD4 // TEA domain family member 4 // --- // 526771
12877704	0.0087303	0.0648	0.63	QTRT1	NM_001206692 // QTRT1 // queuine tRNA-ribosyltransferase 1 // --- // 505497 /// ENSBTAT
12910372	0.0091317	0.0663	0.63	PLAC1	NM_001077057 // PLAC1 // placenta-specific 1 // --- // 767997 /// ENSBTAT00000008260 //
12815030	0.0100794	0.07	0.63	MIR2385	NR_031248 // MIR2385 // microRNA mir-2385 // --- // 100313182
12801674	0.0102074	0.0704	0.63	SLC29A1	NM_001034398 // SLC29A1 // solute carrier family 29 (nucleoside transporters), member 1
12762992	0.0119941	0.0768	0.63	RANGRF	ENSBTAT00000025038 // RANGRF // RAN guanine nucleotide release factor // --- // 512506
12677633	0.0126767	0.0793	0.63
12721948	0.0137003	0.083	0.63	NDRG1	NM_001035009 // NDRG1 // N-myc downstream regulated 1 // --- // 504499 /// ENSBTAT00000
12819574	0.0138277	0.0832	0.63	PPRC1	NM_001205755 // PPRC1 // peroxisome proliferator-activated receptor gamma, coactivator-
12676751	0.0143578	0.0851	0.63
12678550	0.0176218	0.0951	0.63	SST	ENSBTAT00000023020 // SST // somatostatin // 1q23-q25 // 280932 /// NM_173960 // SST //
12786132	0.0182521	0.097	0.63	RPL26L1	NM_001192837 // RPL26L1 // ribosomal protein L26-like 1 // --- // 534970 /// ENSBTAT000
12784416	0.019654	0.101	0.63	CERS6	NM_001193132 // CERS6 // ceramide synthase 6 // --- // 616901 /// ENSBTAT00000061640 //
12708277	0.0222699	0.108	0.63	KIAA1310	NM_001099172 // KIAA1310 // KIAA1310 ortholog // --- // 618190 /// ENSBTAT00000005897 /
12691847	0.0257676	0.118	0.63	HAUS4	NM_001206190 // HAUS4 // HAUS augmin-like complex, subunit 4 // --- // 614307 /// ENSBT
12895030	0.0321371	0.133	0.63	CNTFR	XM_002689804 // CNTFR // ciliary neurotrophic factor receptor // --- // 539548 /// ENSB
12818957	0.0361114	0.141	0.63	PDE6C	NM_174419 // PDE6C // phosphodiesterase 6C, cGMP-specific, cone, alpha prime // --- //
12676053	0.0385188	0.146	0.63
12761228	0.0425385	0.155	0.63	MFAP4	NM_001080217 // MFAP4 // microfibrillar-associated protein 4 // --- // 286766 /// ENSBT
12778245	0.0005806	0.0207	0.62	MYO1B	NM_001102199 // MYO1B // myosin IB // --- // 537282 /// ENSBTAT00000014951 // MYO1B //
12831125	0.0006032	0.0209	0.62	CCND1	NM_001046273 // CCND1 // cyclin D1 // 29qter // 524530 /// ENSBTAT00000023277 // CCND1
12842594	0.0006388	0.0213	0.62	CSF1	ENSBTAT00000000353 // CSF1 // colony stimulating factor 1 (macrophage) // --- // 281094
12762941	0.0006493	0.0215	0.62	VPS53	NM_001193168 // VPS53 // vacuolar protein sorting 53 homolog (S. cerevisiae) // --- //
12785777	0.0006869	0.0218	0.62	FAM169A	NM_001205854 // FAM169A // family with sequence similarity 169, member A // --- // 5193
12840424	0.0007198	0.0221	0.62	INPP5B	ENSBTAT00000033256 // INPP5B // inositol polyphosphate-5-phosphatase, 75kDa // --- // -
12758715	0.0007533	0.0222	0.62	AP2S1	NM_001076078 // AP2S1 // adaptor-related protein complex 2, sigma 1 subunit // --- // 5
12910523	0.0007533	0.0222	0.62
12873019	0.000787	0.0227	0.62
12753436	0.0008437	0.0234	0.62	PAK4	NM_001076184 // PAK4 // p21 protein (Cdc42/Rac)-activated kinase 4 // --- // 539742 ///
12757606	0.0009298	0.0242	0.62	FUK	NM_001100382 // FUK // fucokinase // --- // 519181 /// ENSBTAT00000017266 // FUK // fuc
12828584	0.0010117	0.0249	0.62	TARBP1	XM_002698809 // TARBP1 // TAR (HIV-1) RNA binding protein 1 // --- // 535018 /// XM_614
12801484	0.0010463	0.0251	0.62	BRPF3	NM_001205627 // BRPF3 // bromodomain and PHD finger containing, 3 // --- // 507996
12691809	0.0011047	0.0256	0.62	PAPLN	ENSBTAT00000015505 // PAPLN // papilin, proteoglycan-like sulfated glycoprotein // ---
12837861	0.0011817	0.0262	0.62
12741927	0.0012039	0.0264	0.62	MIF	NM_001033608 // MIF // macrophage migration inhibitory factor (glycosylation-inhibiting
12865449	0.0012295	0.0265	0.62	TTLL12	ENSBTAT00000002240 // TTLL12 // tubulin tyrosine ligase-like family, member 12 // --- /
12729088	0.0012663	0.0269	0.62	SERGEF	NM_001076021 // SERGEF // secretion regulating guanine nucleotide exchange factor // --
12838821	0.0013929	0.0279	0.62	IGSF8	NM_001082439 // IGSF8 // immunoglobulin superfamily, member 8 // --- // 519266 /// ENSB
12757427	0.0013971	0.0279	0.62	MGC137708	NM_001046227 // MGC137708 // uncharacterized LOC516719 // --- // 516719 /// NM_00124455
12718030	0.0014429	0.0281	0.62	BFSP1	NM_174247 // BFSP1 // beaded filament structural protein 1, filensin // --- // 281644 /
12682890	0.001457	0.0282	0.62	ZNF560	ENSBTAT00000054299 // ZNF560 // zinc finger protein 560 // --- // 100139345
12844085	0.0014645	0.0282	0.62	PEA15	NM_001075456 // PEA15 // phosphoprotein enriched in astrocytes 15 // --- // 510586 ///
12799774	0.0014674	0.0282	0.62	MLH1	NM_001075994 // MLH1 // mutL homolog 1, colon cancer, nonpolyposis type 2 (E. coli) //
12731530	0.0015185	0.0285	0.62	USP28	NM_001192998 // USP28 // ubiquitin specific peptidase 28 // --- // 508902 /// ENSBTAT00
12911349	0.0015344	0.0286	0.62
12814482	0.0015409	0.0286	0.62	DECR2	NM_001078122 // DECR2 // 2,4-dienoyl CoA reductase 2, peroxisomal // --- // 768256 ///
12730540	0.0016056	0.0289	0.62	KDELC2	XM_002692967 // KDELC2 // KDEL (Lys-Asp-Glu-Leu) containing 1-like // --- // 100298704
12908904	0.0017955	0.0304	0.62	ZNF711	NM_001205925 // ZNF711 // zinc finger protein 711 // --- // 526026 /// ENSBTAT000000315
12855357	0.0018219	0.0306	0.62	ZMIZ2	NM_001205533 // ZMIZ2 // zinc finger, MIZ-type containing 2 // --- // 537266 /// ENSBTA
12811000	0.0018667	0.0309	0.62	LOC100196899	NM_001143747 // LOC100196899 // uncharacterized LOC100196899 // --- // 100196899 /// EN
12712905	0.0018956	0.0311	0.62	DOCK9	NM_001193099 // DOCK9 // dedicator of cytokinesis 9 // --- // 616045 /// ENSBTAT0000001
12781910	0.0019448	0.0314	0.62	ZAK	NM_001205493 // ZAK // sterile alpha motif and leucine zipper containing kinase AZK //
12730267	0.001988	0.0317	0.62	INPPL1	NM_001191176 // INPPL1 // inositol polyphosphate phosphatase-like 1 // --- // 783833 //
12806452	0.0020715	0.0322	0.62	C23H6orf136	BC109937 // C23H6orf136 // chromosome 23 open reading frame, human C6orf136 // --- // 5
12769801	0.0021402	0.0329	0.62	KIAA0195	XM_002696179 // KIAA0195 // KIAA0195 ortholog // --- // 512110 /// ENSBTAT00000009496 /
12867488	0.002235	0.0338	0.62	CHKB	NM_001206094 // CHKB // choline kinase beta // --- // 536213 /// BC102985 // CHKB // ch
12734323	0.0022588	0.0339	0.62	LOC100336917	ENSBTAT00000034028 // LOC100336917 // dehydrogenase/reductase (SDR family) member 3-lik
12725544	0.0023916	0.0346	0.62	FER1L6	ENSBTAT00000025707 // FER1L6 // fer-1-like 6 (C. elegans) // --- // --- /// XM_00269262
12780762	0.0024765	0.0352	0.62	DNPEP	NM_001045952 // DNPEP // aspartyl aminopeptidase // --- // 506882 /// ENSBTAT0000002867
12726906	0.0025269	0.0356	0.62	TRIM21	NM_182655 // TRIM21 // tripartite motif containing 21 // --- // 359715 /// ENSBTAT00000
12838558	0.0025598	0.0358	0.62	B4GALT3	ENSBTAT00000057494 // B4GALT3 // UDP-Gal:betaGlcNAc beta 1,4- galactosyltransferase, po
12769323	0.0026703	0.0363	0.62	CAMKK1	NM_001192251 // CAMKK1 // calcium/calmodulin-dependent protein kinase kinase 1, alpha /
12783957	0.0026819	0.0364	0.62	ZBTB8A	ENSBTAT00000024222 // ZBTB8A // zinc finger and BTB domain containing 8A // --- // 5412
12679488	0.002704	0.0365	0.62	KIAA0226	NM_001101897 // KIAA0226 // KIAA0226 ortholog // --- // 508354 /// ENSBTAT00000061001 /
12680803	0.0027717	0.0369	0.62	NIT2	ENSBTAT00000006347 // NIT2 // nitrilase family, member 2 // --- // 520620 /// NM_001038
12892131	0.0028603	0.0375	0.62	TNFRSF10D	NM_001102327 // TNFRSF10D // tumor necrosis factor receptor superfamily, member 10d, de
12759210	0.003013	0.0386	0.62	U2AF1L4	ENSBTAT00000032279 // U2AF1L4 // U2 small nuclear RNA auxiliary factor 1-like 4 // ---
12905500	0.0034074	0.0409	0.62	HDAC8	NM_001076231 // HDAC8 // histone deacetylase 8 // --- // 540666 /// ENSBTAT00000063475
12830692	0.0034348	0.041	0.62	SSH3	ENSBTAT00000018426 // SSH3 // slingshot homolog 3 (Drosophila) // --- // 514643 /// NM_
12801560	0.0034712	0.0411	0.62	PHF1	NM_001098914 // PHF1 // PHD finger protein 1 // --- // 508957 /// ENSBTAT00000002140 //
12814010	0.0035924	0.0419	0.62	RMI2	ENSBTAT00000037465 // RMI2 // RMI2, RecQ mediated genome instability 2, homolog (S. cer
12712387	0.0037516	0.0427	0.62	MYCBP2	NM_001192817 // MYCBP2 // MYC binding protein 2 // --- // 534496 /// ENSBTAT00000025100
12878388	0.003906	0.0435	0.62	HMGXB3	XM_586367 // HMGXB3 // HMG box domain containing 3 // --- // 509419 /// ENSBTAT00000035
12774661	0.0043514	0.0459	0.62	SDHB	NM_001040483 // SDHB // succinate dehydrogenase complex, subunit B, iron sulfur (Ip) //
12735060	0.0043586	0.0459	0.62	SRM	XM_582280 // SRM // spermidine synthase // --- // 505916 /// ENSBTAT00000006978 // SRM
12703615	0.0044044	0.0462	0.62	MIR2295	NR_031092 // MIR2295 // microRNA mir-2295 // --- // 100313460
12870985	0.0045246	0.0468	0.62	PCDH7	NM_001192975 // PCDH7 // protocadherin 7 // --- // 514537 /// ENSBTAT00000000069 // PCD
12901502	0.0050562	0.0495	0.62	MB21D1	XM_001251098 // MB21D1 // Mab-21 domain containing 1 // --- // 782472 /// ENSBTAT000000
12719212	0.0056002	0.0519	0.62	RBBP9	NM_001083424 // RBBP9 // retinoblastoma binding protein 9 // --- // 513835 /// ENSBTAT0
12716231	0.0056939	0.0522	0.62	UCKL1	BC149131 // UCKL1 // uridine-cytidine kinase 1-like 1 // --- // 534046
12709043	0.0058524	0.0529	0.62	POSTN	NM_001040479 // POSTN // periostin, osteoblast specific factor // --- // 281960 /// ENS
12798802	0.0060524	0.0536	0.62	SLC4A7	NM_001098926 // SLC4A7 // solute carrier family 4, sodium bicarbonate cotransporter, me
12815709	0.0062716	0.0545	0.62	SPNS1	NM_001076808 // SPNS1 // spinster homolog 1 (Drosophila) // --- // 505997 /// ENSBTAT00
12889610	0.0067257	0.0567	0.62	KIAA1967	BT026216 // KIAA1967 // KIAA1967 ortholog // --- // 507114 /// NM_001075298 // KIAA1967
12715188	0.0070526	0.0581	0.62	PLXDC2	NM_001077928 // PLXDC2 // plexin domain containing 2 // --- // 515731 /// ENSBTAT000000
12851611	0.0076568	0.0606	0.62	TBX20	NM_001192237 // TBX20 // T-box 20 // --- // 539419 /// ENSBTAT00000023312 // TBX20 // T
12718453	0.0080186	0.0621	0.62	PLTP	ENSBTAT00000000732 // PLTP // phospholipid transfer protein // --- // 505640 /// NM_001
12676857	0.0083073	0.0631	0.62
12805964	0.0086485	0.0645	0.62	RCAN2	ENSBTAT00000046658 // RCAN2 // regulator of calcineurin 2 // --- // 525636 /// BC102981
12775638	0.0086515	0.0645	0.62	FAM134A	NM_001205608 // FAM134A // family with sequence similarity 134, member A // --- // 5074
12822532	0.0087264	0.0648	0.62	NSMCE4A	NM_001038678 // NSMCE4A // non-SMC element 4 homolog A (S. cerevisiae) // --- // 527312
12676613	0.0091759	0.0665	0.62
12694168	0.0109744	0.0731	0.62
12745324	0.0121932	0.0774	0.62	TLR2	NM_174197 // TLR2 // toll-like receptor 2 // --- // 281534 /// ENSBTAT00000010530 // TL
12838041	0.0126585	0.0793	0.62	CTSK	NM_001034435 // CTSK // cathepsin K // --- // 513038 /// ENSBTAT00000028016 // CTSK //
12912479	0.0129589	0.0805	0.62
12740739	0.0131997	0.0811	0.62	SERPINC1	NM_001034698 // SERPINC1 // serpin peptidase inhibitor, clade C (antithrombin), member
12840165	0.0140295	0.0839	0.62	SPAG17	NM_001206874 // SPAG17 // sperm associated antigen 17 // --- // 535545 /// ENSBTAT00000
12714001	0.0144975	0.0856	0.62	ID1	NM_001097568 // ID1 // inhibitor of DNA binding 1, dominant negative helix-loop-helix p
12738957	0.015156	0.0879	0.62	SCCPDH	NM_001034288 // SCCPDH // saccharopine dehydrogenase (putative) // --- // 507289 /// EN
12787255	0.0165668	0.0923	0.62	ADCY2	GU553085 // ADCY2 // adenylate cyclase 2 (brain) // --- // 510708
12769980	0.0174678	0.0946	0.62	MYBBP1A	XM_002695760 // MYBBP1A // MYB binding protein (P160) 1a // --- // 513045 /// ENSBTAT00
12883172	0.0278434	0.123	0.62	HAPLN1	NM_174288 // HAPLN1 // hyaluronan and proteoglycan link protein 1 // --- // 281717 ///
12676783	0.0401075	0.149	0.62
12675391	0.0409102	0.151	0.62
12709719	0.0005031	0.0201	0.61	MIPEP	XM_595703 // MIPEP // mitochondrial intermediate peptidase // --- // 517531 /// ENSBTAT
12773289	0.000508	0.0202	0.61	LLGL1	NM_001080342 // LLGL1 // lethal giant larvae homolog 1 (Drosophila) // --- // 781865 //
12686108	0.0005329	0.0206	0.61	OSBPL11	NM_001193008 // OSBPL11 // oxysterol binding protein-like 11 // --- // 538576 /// ENSBT
12687801	0.0005496	0.0206	0.61
12702167	0.0005757	0.0207	0.61	SPTAN1	NM_001114156 // SPTAN1 // spectrin, alpha, non-erythrocytic 1 // --- // 540108 /// ENSB
12833345	0.0005792	0.0207	0.61	UNC93B1	NM_001193147 // UNC93B1 // unc-93 homolog B1 (C. elegans) // --- // 508878 /// ENSBTAT0
12759819	0.0005824	0.0207	0.61	LOC618289	XM_002706931 // LOC618289 // zinc finger protein 91-like // --- // 618289
12767338	0.0006026	0.0209	0.61	LLGL1	NM_001080342 // LLGL1 // lethal giant larvae homolog 1 (Drosophila) // --- // 781865 //
12746249	0.0006445	0.0214	0.61	PPIL2	NM_001038081 // PPIL2 // peptidylprolyl isomerase (cyclophilin)-like 2 // --- // 511467
12894119	0.0006805	0.0217	0.61	PTCH1	NM_001205879 // PTCH1 // patched 1 // --- // 520994 /// ENSBTAT00000013074 // PTCH1 //
12719690	0.0007272	0.0221	0.61	FITM2	NM_001103095 // FITM2 // fat storage-inducing transmembrane protein 2 // --- // 518159
12797118	0.0007332	0.0222	0.61	EIF4E3	NM_001102306 // EIF4E3 // eukaryotic translation initiation factor 4E family member 3 /
12679131	0.0008166	0.0231	0.61	GRAMD1C	NM_001103229 // GRAMD1C // GRAM domain containing 1C // --- // 505581 /// ENSBTAT000000
12688001	0.0008437	0.0234	0.61	THBS1	NM_174196 // THBS1 // thrombospondin 1 // --- // 281530 /// ENSBTAT00000002600 // THBS1
12861583	0.000856	0.0234	0.61	CALCOCO1	NM_001046435 // CALCOCO1 // calcium binding and coiled-coil domain 1 // --- // 538675 /
12911723	0.0008658	0.0235	0.61
12737270	0.0009519	0.0245	0.61	PEX10	NM_001076333 // PEX10 // peroxisomal biogenesis factor 10 // --- // 614539 /// ENSBTAT0
12741622	0.0009552	0.0245	0.61	NUDT6	NM_001105650 // NUDT6 // nudix (nucleoside diphosphate linked moiety X)-type motif 6 //
12717295	0.0009955	0.0249	0.61	RNF24	NM_001077052 // RNF24 // ring finger protein 24 // --- // 767991 /// ENSBTAT00000010416
12697103	0.0010704	0.0253	0.61	ZFP36L1	NM_001101234 // ZFP36L1 // zinc finger protein 36, C3H type-like 1 // --- // 614773 ///
12780755	0.0011212	0.0257	0.61	RCAN3	NM_001045945 // RCAN3 // RCAN family member 3 // --- // 506601 /// ENSBTAT00000023194 /
12876822	0.0011229	0.0257	0.61	CAST	NM_001030318 // CAST // calpastatin // --- // 281039 /// NM_174003 // CAST // calpastat
12827570	0.0011636	0.026	0.61	PLA2G12B	XM_003584193 // PLA2G12B // phospholipase A2, group XIIB // --- // 100337447 /// ENSBTA
12775855	0.0012825	0.0271	0.61	FAP	NM_001098001 // FAP // fibroblast activation protein, alpha // --- // 508882 /// ENSBTA
12753565	0.0013073	0.0273	0.61	NFATC3	NM_001192831 // NFATC3 // nuclear factor of activated T-cells, cytoplasmic, calcineurin
12841901	0.0014155	0.028	0.61	LOC787081	XM_001254585 // LOC787081 // UPF0632 protein A // --- // 787081
12895808	0.0014782	0.0283	0.61	FKBP15	ENSBTAT00000006746 // FKBP15 // FK506 binding protein 15, 133kDa // --- // 783009
12886623	0.001519	0.0285	0.61	SAP30L	ENSBTAT00000005222 // SAP30L // SAP30-like // --- // 533462
12835903	0.0015454	0.0286	0.61	ABCA4	ENSBTAT00000023982 // ABCA4 // ATP-binding cassette, sub-family A (ABC1), member 4 // -
12876169	0.0015488	0.0286	0.61
12733284	0.0015981	0.0289	0.61	MPPED2	NM_001076929 // MPPED2 // metallophosphoesterase domain containing 2 // --- // 540914 /
12837074	0.0016151	0.029	0.61	TXNIP	NM_001101875 // TXNIP // thioredoxin interacting protein // --- // 506790 /// BC149157
12706002	0.0016975	0.0298	0.61	MTHFD2	NM_001075755 // MTHFD2 // methylenetetrahydrofolate dehydrogenase (NADP+ dependent) 2,
12675599	0.0019918	0.0317	0.61
12850742	0.0020316	0.0319	0.61	ZNF783	XM_003586024 // ZNF783 // zinc finger protein 783 // --- // 536307 /// XM_003582160 //
12791210	0.0020326	0.0319	0.61	C21H15orf17	NM_001206267 // C21H15orf17 // chromosome 21 open reading frame, human C15orf17 // ---
12764304	0.0024153	0.0348	0.61	NT5C	ENSBTAT00000015317 // NT5C // 5', 3'-nucleotidase, cytosolic // --- // 532399 /// NM_00
12890767	0.0024335	0.0348	0.61	SLC31A2	NM_001034556 // SLC31A2 // solute carrier family 31 (copper transporters), member 2 //
12680768	0.0025847	0.0359	0.61	MB21D2	NM_001205856 // MB21D2 // Mab-21 domain containing 2 // --- // 519376 /// ENSBTAT000000
12887876	0.0026901	0.0365	0.61	EFNA5	NM_001076432 // EFNA5 // ephrin-A5 // --- // 616742 /// ENSBTAT00000021953 // EFNA5 //
12742235	0.0026983	0.0365	0.61	ZNF268	ENSBTAT00000056095 // ZNF268 // zinc finger protein 268 // --- // 506621
12837063	0.0027236	0.0366	0.61
12882037	0.0033205	0.0404	0.61	PNPLA6	NM_001076547 // PNPLA6 // patatin-like phospholipase domain containing 6 // --- // 7678
12787307	0.0033208	0.0404	0.61	GPX8	NM_001046088 // GPX8 // glutathione peroxidase 8 (putative) // --- // 511575 /// ENSBTA
12841230	0.0036424	0.0422	0.61	GSTM3	NM_001046560 // GSTM3 // glutathione S-transferase mu 3 (brain) // --- // 615507 /// EN
12855735	0.0037328	0.0426	0.61	ZC3HAV1	XM_002686998 // ZC3HAV1 // zinc finger CCCH-type, antiviral 1 // --- // 614589 /// ENSB
12854683	0.003756	0.0427	0.61	SOSTDC1	NM_001046265 // SOSTDC1 // sclerostin domain containing 1 // --- // 523184 /// ENSBTAT0
12876640	0.0042917	0.0456	0.61	PCDHGB3	XM_002689258 // PCDHGB3 // protocadherin gamma subfamily B, 3 // --- // 100337133
12809257	0.0045531	0.0469	0.61	COLEC12	NM_001101843 // COLEC12 // collectin sub-family member 12 // --- // 504741 /// ENSBTAT0
12903165	0.0048817	0.0487	0.61	AGTR2	ENSBTAT00000052443 // AGTR2 // angiotensin II receptor, type 2 // --- // 407157
12726392	0.0051863	0.0501	0.61	C15H11orf93	XM_002701310 // C15H11orf93 // uncharacterized LOC100294918 // --- // 100294918
12872140	0.0058655	0.0529	0.61	NIPAL1	NM_001192302 // NIPAL1 // NIPA-like domain containing 1 // --- // 539757 /// ENSBTAT000
12875869	0.0062248	0.0542	0.61	PROM1	HQ159409 // PROM1 // prominin 1 // --- // 618054 /// ENSBTAT00000018252 // PROM1 // pro
[truncated: 1,195 more rows]

## Sheet: B - Correlation qPCR and MA
Table S1-B: Correlation between microarray and qPCR measurements
Gene	qPCR	Gene array	Correlation coefficient	P-value
ADM	7.79	3.26	0.863	0.027
HPSE	7.03	3.71	0.771	0.072
PAG14	6.2	3.99	0.781	0.067
XIAP	5.37	3.49	0.783	0.066
SLC1A4	2.4	2.65	0.514	0.298
PTK2	2.09	1.96	0.687	0.132
VAV2	1.89	3.1	0.722	0.106
DAO	1.64	4.29	0.89	0.018
TNS1	-1.56	-2.5	0.808	0.052
HSD3B1	-1.75	-1.85	0.363	0.48
LIMK1	-2.15	-2.63	0.627	0.183
GPC1	-2.5	-2.04	0.954	0.003
CITED1	-4	-3.33	0.743	0.091
ITGB4	-4.63	-3.13	0.365	0.478
GJB5	-6.53	-3.7	0.929	0.007

## Sheet: C - DEG list_DAVID IDs
Table S1-C: List of DEGs implemented in DAVID
OFFICIAL_GENE_SYMBOL	Name	Species
FCGRT	Fc fragment of IgG receptor and transporter(FCGRT)	Bos taurus
ANXA4	annexin A4(ANXA4)	Bos taurus
ANXA8L1	annexin A8-like 1(ANXA8L1)	Bos taurus
FUZ	fuzzy planar cell polarity protein(FUZ)	Bos taurus
ANXA5	annexin A5(ANXA5)	Bos taurus
KCTD1	potassium channel tetramerization domain containing 1(KCTD1)	Bos taurus
NDUFAF4	NADH:ubiquinone oxidoreductase complex assembly factor 4(NDUFAF4)	Bos taurus
PRP-VII	prolactin-related protein VII(PRP-VII)	Bos taurus
ATP5G1	ATP synthase, H+ transporting, mitochondrial Fo complex subunit C1 (subunit 9)(ATP5G1)	Bos taurus
SRA1	steroid receptor RNA activator 1(SRA1)	Bos taurus
HEBP1	heme binding protein 1(HEBP1)	Bos taurus
TBC1D19	TBC1 domain family member 19(TBC1D19)	Bos taurus
TP53I3	tumor protein p53 inducible protein 3(TP53I3)	Bos taurus
SERPINA5	serpin family A member 5(SERPINA5)	Bos taurus
CYP11A1	cytochrome P450, family 11, subfamily A, polypeptide 1(CYP11A1)	Bos taurus
STX1A	syntaxin 1A(STX1A)	Bos taurus
CRYBG3	crystallin beta-gamma domain containing 3(CRYBG3)	Bos taurus
UNC93B1	unc-93 homolog B1 (C. elegans)(UNC93B1)	Bos taurus
MAZ	MYC associated zinc finger protein(MAZ)	Bos taurus
STC1	stanniocalcin 1(STC1)	Bos taurus
FAP	fibroblast activation protein alpha(FAP)	Bos taurus
AOX1	aldehyde oxidase 1(AOX1)	Bos taurus
NDUFB3	NADH:ubiquinone oxidoreductase subunit B3(NDUFB3)	Bos taurus
BFAR	bifunctional apoptosis regulator(BFAR)	Bos taurus
ALDH1A1	aldehyde dehydrogenase 1 family member A1(ALDH1A1)	Bos taurus
ADAM9	ADAM metallopeptidase domain 9(ADAM9)	Bos taurus
BTBD19	BTB domain containing 19(BTBD19)	Bos taurus
CHRNA1	cholinergic receptor nicotinic alpha 1 subunit(CHRNA1)	Bos taurus
EIF2AK2	eukaryotic translation initiation factor 2 alpha kinase 2(EIF2AK2)	Bos taurus
ADCY2	adenylate cyclase 2(ADCY2)	Bos taurus
CEP89	centrosomal protein 89(CEP89)	Bos taurus
APLNR	apelin receptor(APLNR)	Bos taurus
LOC528815	pregnancy-associated glycoprotein 2(LOC528815)	Bos taurus
AGTR1	angiotensin II receptor type 1(AGTR1)	Bos taurus
CFLAR	CASP8 and FADD like apoptosis regulator(CFLAR)	Bos taurus
BBX	BBX, HMG-box containing(BBX)	Bos taurus
USP28	ubiquitin specific peptidase 28(USP28)	Bos taurus
CAPN2	calpain 2, (m/II) large subunit(CAPN2)	Bos taurus
CAPN1	calpain 1(CAPN1)	Bos taurus
CALD1	caldesmon 1(CALD1)	Bos taurus
RNF185	ring finger protein 185(RNF185)	Bos taurus
KLHL32	kelch like family member 32(KLHL32)	Bos taurus
STAM	signal transducing adaptor molecule(STAM)	Bos taurus
SLC35F5	solute carrier family 35 member F5(SLC35F5)	Bos taurus
CABP1	calcium binding protein 1(CABP1)	Bos taurus
B4GALT6	beta-1,4-galactosyltransferase 6(B4GALT6)	Bos taurus
XIAP	X-linked inhibitor of apoptosis(XIAP)	Bos taurus
BFSP1	beaded filament structural protein 1(BFSP1)	Bos taurus
IFFO2	intermediate filament family orphan 2(IFFO2)	Bos taurus
RCN2	reticulocalbin 2(RCN2)	Bos taurus
ARRB1	arrestin beta 1(ARRB1)	Bos taurus
TMEM184A	transmembrane protein 184A(TMEM184A)	Bos taurus
GSTM3	glutathione S-transferase mu 3(GSTM3)	Bos taurus
DHFR	dihydrofolate reductase(DHFR)	Bos taurus
CFDP1	craniofacial development protein 1(CFDP1)	Bos taurus
SMOC2	SPARC related modular calcium binding 2(SMOC2)	Bos taurus
HACL1	2-hydroxyacyl-CoA lyase 1(HACL1)	Bos taurus
RTN2	reticulon 2(RTN2)	Bos taurus
GZMK	granzyme K(GZMK)	Bos taurus
TRIP10	thyroid hormone receptor interactor 10(TRIP10)	Bos taurus
ZNF219	zinc finger protein 219(ZNF219)	Bos taurus
AQP7	aquaporin 7(AQP7)	Bos taurus
TRIM21	tripartite motif containing 21(TRIM21)	Bos taurus
COL12A1	collagen type XII alpha 1 chain(COL12A1)	Bos taurus
CD226	CD226 molecule(CD226)	Bos taurus
DNMT3A	DNA methyltransferase 3 alpha(DNMT3A)	Bos taurus
RASGRP1	RAS guanyl releasing protein 1(RASGRP1)	Bos taurus
ANG	Angularity(ANG)	Bos taurus
ANG	Angularity(ANG)	Bos taurus
ANG	Angularity(ANG)	Bos taurus
ANG	Angularity(ANG)	Bos taurus
SERPINB9	serpin peptidase inhibitor, clade B (ovalbumin), member 9(SERPINB9)	Bos taurus
MLXIPL	MLX interacting protein like(MLXIPL)	Bos taurus
HAPLN1	hyaluronan and proteoglycan link protein 1(HAPLN1)	Bos taurus
CHST11	carbohydrate sulfotransferase 11(CHST11)	Bos taurus
DGKH	diacylglycerol kinase eta(DGKH)	Bos taurus
PHLPP2	PH domain and leucine rich repeat protein phosphatase 2(PHLPP2)	Bos taurus
TNS3	tensin 3(TNS3)	Bos taurus
CCNO	cyclin O(CCNO)	Bos taurus
PRKAB2	protein kinase AMP-activated non-catalytic subunit beta 2(PRKAB2)	Bos taurus
CCND1	cyclin D1(CCND1)	Bos taurus
GALNT7	polypeptide N-acetylgalactosaminyltransferase 7(GALNT7)	Bos taurus
DHRS1	dehydrogenase/reductase 1(DHRS1)	Bos taurus
ANG	Angularity(ANG)	Bos taurus
ANG	Angularity(ANG)	Bos taurus
ANG	Angularity(ANG)	Bos taurus
ANG	Angularity(ANG)	Bos taurus
CDC14B	cell division cycle 14B(CDC14B)	Bos taurus
CLTB	clathrin light chain B(CLTB)	Bos taurus
CLIC5	chloride intracellular channel 5(CLIC5)	Bos taurus
PHLDB3	pleckstrin homology like domain family B member 3(PHLDB3)	Bos taurus
ANG	Angularity(ANG)	Bos taurus
SLC8A1	solute carrier family 8 member A1(SLC8A1)	Bos taurus
LOC784451	C-type lectin domain family 2 member H(LOC784451)	Bos taurus
SCPEP1	serine carboxypeptidase 1(SCPEP1)	Bos taurus
CD53	CD53 molecule(CD53)	Bos taurus
EPB41	erythrocyte membrane protein band 4.1(EPB41)	Bos taurus
MID1IP1	MID1 interacting protein 1(MID1IP1)	Bos taurus
ENPP6	ectonucleotide pyrophosphatase/phosphodiesterase 6(ENPP6)	Bos taurus
C3H1orf168	chromosome 3 open reading frame, human C1orf168(C3H1orf168)	Bos taurus
TFPI	tissue factor pathway inhibitor(TFPI)	Bos taurus
ANG	Angularity(ANG)	Bos taurus
CXCL2	chemokine (C-X-C motif) ligand 2(CXCL2)	Bos taurus
SAAL1	serum amyloid A like 1(SAAL1)	Bos taurus
FASTKD5	FAST kinase domains 5(FASTKD5)	Bos taurus
CYP17A1	cytochrome P450, family 17, subfamily A, polypeptide 1(CYP17A1)	Bos taurus
CYP19A1	cytochrome P450, family 19, subfamily A, polypeptide 1(CYP19A1)	Bos taurus
RMI2	RecQ mediated genome instability 2(RMI2)	Bos taurus
GCNT1	glucosaminyl (N-acetyl) transferase 1, core 2(GCNT1)	Bos taurus
ANG	Angularity(ANG)	Bos taurus
L3MBTL3	l(3)mbt-like 3 (Drosophila)(L3MBTL3)	Bos taurus
GGTA1	alpha-galactosyltransferase 1 (glycoprotein)(GGTA1)	Bos taurus
BCL9	B-cell CLL/lymphoma 9(BCL9)	Bos taurus
LOC100296774	cysteine dioxygenase type 1-like(LOC100296774)	Bos taurus
GNAI1	G protein subunit alpha i1(GNAI1)	Bos taurus
GDAP2	ganglioside induced differentiation associated protein 2(GDAP2)	Bos taurus
GNA14	G protein subunit alpha 14(GNA14)	Bos taurus
DNM1	dynamin 1(DNM1)	Bos taurus
TSPAN7	tetraspanin 7(TSPAN7)	Bos taurus
SNRPA1	small nuclear ribonucleoprotein polypeptide A'(SNRPA1)	Bos taurus
FABP5	fatty acid binding protein 5(FABP5)	Bos taurus
PDK1	pyruvate dehydrogenase kinase 1(PDK1)	Bos taurus
NTN4	netrin 4(NTN4)	Bos taurus
LOC533085	ran-binding protein 17(LOC533085)	Bos taurus
FBXO2	F-box protein 2(FBXO2)	Bos taurus
KCTD15	potassium channel tetramerization domain containing 15(KCTD15)	Bos taurus
EXOG	exo/endonuclease G(EXOG)	Bos taurus
PEX7	peroxisomal biogenesis factor 7(PEX7)	Bos taurus
F2RL2	coagulation factor II thrombin receptor like 2(F2RL2)	Bos taurus
CYP51A1	cytochrome P450, family 51, subfamily A, polypeptide 1(CYP51A1)	Bos taurus
ANKRD22	ankyrin repeat domain 22(ANKRD22)	Bos taurus
MVP	major vault protein(MVP)	Bos taurus
PYCR2	pyrroline-5-carboxylate reductase family member 2(PYCR2)	Bos taurus
KREMEN1	kringle containing transmembrane protein 1(KREMEN1)	Bos taurus
GMIP	GEM interacting protein(GMIP)	Bos taurus
MAGED1	melanoma antigen family D, 1(MAGED1)	Bos taurus
TMEM50B	transmembrane protein 50B(TMEM50B)	Bos taurus
GPR68	G protein-coupled receptor 68(GPR68)	Bos taurus
TLL2	tolloid like 2(TLL2)	Bos taurus
PAF1	Paf1, RNA polymerase II associated factor, homolog (S. cerevisiae)(PAF1)	Bos taurus
NPR1	natriuretic peptide receptor 1(NPR1)	Bos taurus
GNAT1	G protein subunit alpha transducin 1(GNAT1)	Bos taurus
CDK14	cyclin dependent kinase 14(CDK14)	Bos taurus
OSR2	odd-skipped related transciption factor 2(OSR2)	Bos taurus
GRK5	G protein-coupled receptor kinase 5(GRK5)	Bos taurus
CD68	CD68 molecule(CD68)	Bos taurus
ATP11A	ATPase phospholipid transporting 11A(ATP11A)	Bos taurus
SLC7A6OS	solute carrier family 7 member 6 opposite strand(SLC7A6OS)	Bos taurus
ABHD2	abhydrolase domain containing 2(ABHD2)	Bos taurus
USP46	ubiquitin specific peptidase 46(USP46)	Bos taurus
S100Z	S100 calcium binding protein Z(S100Z)	Bos taurus
SEC13	SEC13 homolog, nuclear pore and COPII coat complex component(SEC13)	Bos taurus
CCDC120	coiled-coil domain containing 120(CCDC120)	Bos taurus
TNFRSF1B	TNF receptor superfamily member 1B(TNFRSF1B)	Bos taurus
MYBL1	MYB proto-oncogene like 1(MYBL1)	Bos taurus
ZDHHC20	zinc finger DHHC-type containing 20(ZDHHC20)	Bos taurus
P2RX4	purinergic receptor P2X 4(P2RX4)	Bos taurus
ATP6V0A2	ATPase H+ transporting V0 subunit a2(ATP6V0A2)	Bos taurus
HSD3B1	hydroxy-delta-5-steroid dehydrogenase, 3 beta- and steroid delta-isomerase 1(HSD3B1)	Bos taurus
ICAM1	intercellular adhesion molecule 1(ICAM1)	Bos taurus
FAH	fumarylacetoacetate hydrolase(FAH)	Bos taurus
RBP1	retinol binding protein 1(RBP1)	Bos taurus
DNASE1L3	deoxyribonuclease 1 like 3(DNASE1L3)	Bos taurus
CPA4	carboxypeptidase A4(CPA4)	Bos taurus
IL17B	interleukin 17B(IL17B)	Bos taurus
RASA2	RAS p21 protein activator 2(RASA2)	Bos taurus
MYO1B	myosin IB(MYO1B)	Bos taurus
SLC19A3	solute carrier family 19 member 3(SLC19A3)	Bos taurus
INPP1	inositol polyphosphate-1-phosphatase(INPP1)	Bos taurus
PVRL1	poliovirus receptor-related 1 (herpesvirus entry mediator C)(PVRL1)	Bos taurus
PPFIA3	PTPRF interacting protein alpha 3(PPFIA3)	Bos taurus
MEGF8	multiple EGF like domains 8(MEGF8)	Bos taurus
NKG7	natural killer cell granule protein 7(NKG7)	Bos taurus
FAM3C	family with sequence similarity 3 member C(FAM3C)	Bos taurus
SUSD4	sushi domain containing 4(SUSD4)	Bos taurus
TTC25	tetratricopeptide repeat domain 25(TTC25)	Bos taurus
TBC1D10C	TBC1 domain family member 10C(TBC1D10C)	Bos taurus
KITLG	KIT ligand(KITLG)	Bos taurus
SAMHD1	SAM and HD domain containing deoxynucleoside triphosphate triphosphohydrolase 1(SAMHD1)	Bos taurus
ITGA2	integrin subunit alpha 2(ITGA2)	Bos taurus
EML5	echinoderm microtubule associated protein like 5(EML5)	Bos taurus
TAT	tyrosine aminotransferase(TAT)	Bos taurus
FKBP14	FK506 binding protein 14, 22 kDa(FKBP14)	Bos taurus
CSAD	cysteine sulfinic acid decarboxylase(CSAD)	Bos taurus
LAMP1	lysosomal associated membrane protein 1(LAMP1)	Bos taurus
LLGL1	lethal giant larvae homolog(LLGL1)	Bos taurus
TGFBR3	transforming growth factor beta receptor 3(TGFBR3)	Bos taurus
SAP30L	SAP30 like(SAP30L)	Bos taurus
LOC508666	C-C motif chemokine 23(LOC508666)	Bos taurus
NIT2	nitrilase family member 2(NIT2)	Bos taurus
RIPK4	receptor interacting serine/threonine kinase 4(RIPK4)	Bos taurus
TSC1	tuberous sclerosis 1(TSC1)	Bos taurus
SLC44A4	solute carrier family 44 member 4(SLC44A4)	Bos taurus
CCNF	cyclin F(CCNF)	Bos taurus
MMP13	matrix metallopeptidase 13(MMP13)	Bos taurus
DNAI1	dynein axonemal intermediate chain 1(DNAI1)	Bos taurus
SLC45A4	solute carrier family 45 member 4(SLC45A4)	Bos taurus
SNAI2	snail family transcriptional repressor 2(SNAI2)	Bos taurus
HSDL1	hydroxysteroid dehydrogenase like 1(HSDL1)	Bos taurus
DNAJA4	DnaJ heat shock protein family (Hsp40) member A4(DNAJA4)	Bos taurus
PRODH	proline dehydrogenase (oxidase) 1(PRODH)	Bos taurus
GBE1	1,4-alpha-glucan branching enzyme 1(GBE1)	Bos taurus
TFB1M	transcription factor B1, mitochondrial(TFB1M)	Bos taurus
PURG	purine rich element binding protein G(PURG)	Bos taurus
ELOVL2	ELOVL fatty acid elongase 2(ELOVL2)	Bos taurus
ZNF473	zinc finger protein 473(ZNF473)	Bos taurus
PRELID2	PRELI domain containing 2(PRELID2)	Bos taurus
TIMM13	translocase of inner mitochondrial membrane 13(TIMM13)	Bos taurus
ADI1	acireductone dioxygenase 1(ADI1)	Bos taurus
GPRC5B	G protein-coupled receptor class C group 5 member B(GPRC5B)	Bos taurus
NCAM1	neural cell adhesion molecule 1(NCAM1)	Bos taurus
ESYT1	extended synaptotagmin 1(ESYT1)	Bos taurus
LOC100300956	uncharacterized LOC100300956(LOC100300956)	Bos taurus
CALR3	calreticulin 3(CALR3)	Bos taurus
MYO1C	myosin IC(MYO1C)	Bos taurus
PAG1	pregnancy-associated glycoprotein 1(PAG1)	Bos taurus
CPA4	carboxypeptidase A4(CPA4)	Bos taurus
POSTN	periostin(POSTN)	Bos taurus
OSTF1	osteoclast stimulating factor 1(OSTF1)	Bos taurus
ZNF33B	zinc finger protein 33B(ZNF33B)	Bos taurus
CCDC14	coiled-coil domain containing 14(CCDC14)	Bos taurus
USP32	ubiquitin specific peptidase 32(USP32)	Bos taurus
CETN2	centrin 2(CETN2)	Bos taurus
EML1	echinoderm microtubule associated protein like 1(EML1)	Bos taurus
CRADD	CASP2 and RIPK1 domain containing adaptor with death domain(CRADD)	Bos taurus
PDLIM2	PDZ and LIM domain 2(PDLIM2)	Bos taurus
ABTB2	ankyrin repeat and BTB domain containing 2(ABTB2)	Bos taurus
PLAUR	plasminogen activator, urokinase receptor(PLAUR)	Bos taurus
SNX7	sorting nexin 7(SNX7)	Bos taurus
ACAP1	ArfGAP with coiled-coil, ankyrin repeat and PH domains 1(ACAP1)	Bos taurus
TUBGCP5	tubulin gamma complex associated protein 5(TUBGCP5)	Bos taurus
IFI6	interferon alpha inducible protein 6(IFI6)	Bos taurus
ZMIZ2	zinc finger MIZ-type containing 2(ZMIZ2)	Bos taurus
ARHGEF5	Rho guanine nucleotide exchange factor 5(ARHGEF5)	Bos taurus
DYRK3	dual specificity tyrosine phosphorylation regulated kinase 3(DYRK3)	Bos taurus
PDE6C	phosphodiesterase 6C(PDE6C)	Bos taurus
PDE1B	phosphodiesterase 1B(PDE1B)	Bos taurus
PLCD1	phospholipase C delta 1(PLCD1)	Bos taurus
MOGS	mannosyl-oligosaccharide glucosidase(MOGS)	Bos taurus
MGLL	monoglyceride lipase(MGLL)	Bos taurus
PLCB4	phospholipase C beta 4(PLCB4)	Bos taurus
ESF1	ESF1 nucleolar pre-rRNA processing protein homolog(ESF1)	Bos taurus
ZNF331	zinc finger protein 331(ZNF331)	Bos taurus
NAP1L5	nucleosome assembly protein 1 like 5(NAP1L5)	Bos taurus
GPR34	G protein-coupled receptor 34(GPR34)	Bos taurus
LGALS9	lectin, galactoside-binding, soluble, 9(LGALS9)	Bos taurus
ABHD6	abhydrolase domain containing 6(ABHD6)	Bos taurus
PPARG	peroxisome proliferator activated receptor gamma(PPARG)	Bos taurus
PPARA	peroxisome proliferator activated receptor alpha(PPARA)	Bos taurus
ELF3	E74 like ETS transcription factor 3(ELF3)	Bos taurus
PRKCG	protein kinase C gamma(PRKCG)	Bos taurus
PRKCA	protein kinase C alpha(PRKCA)	Bos taurus
PROS1	protein S (alpha)(PROS1)	Bos taurus
SLC5A5	solute carrier family 5 member 5(SLC5A5)	Bos taurus
PRP14	prolactin-related protein 14(PRP14)	Bos taurus
NAGA	alpha-N-acetylgalactosaminidase(NAGA)	Bos taurus
PNPLA2	patatin like phospholipase domain containing 2(PNPLA2)	Bos taurus
PTPN4	protein tyrosine phosphatase, non-receptor type 4(PTPN4)	Bos taurus
PSIP1	PC4 and SFRS1 interacting protein 1(PSIP1)	Bos taurus
OSBPL8	oxysterol binding protein like 8(OSBPL8)	Bos taurus
FGR	FGR proto-oncogene, Src family tyrosine kinase(FGR)	Bos taurus
SMPDL3A	sphingomyelin phosphodiesterase acid like 3A(SMPDL3A)	Bos taurus
PTGES	prostaglandin E synthase(PTGES)	Bos taurus
PTGFR	prostaglandin F receptor(PTGFR)	Bos taurus
PTGS2	prostaglandin-endoperoxide synthase 2(PTGS2)	Bos taurus
AHI1	Abelson helper integration site 1(AHI1)	Bos taurus
RAB4A	RAB4A, member RAS oncogene family(RAB4A)	Bos taurus
GATSL2	GATS protein like 2(GATSL2)	Bos taurus
PRKG2	protein kinase, cGMP-dependent, type II(PRKG2)	Bos taurus
AMDHD1	amidohydrolase domain containing 1(AMDHD1)	Bos taurus
SIN3B	SIN3 transcription regulator family member B(SIN3B)	Bos taurus
AGTRAP	angiotensin II receptor associated protein(AGTRAP)	Bos taurus
ARHGAP5	Rho GTPase activating protein 5(ARHGAP5)	Bos taurus
RGS16	regulator of G-protein signaling 16(RGS16)	Bos taurus
TRIP6	thyroid hormone receptor interactor 6(TRIP6)	Bos taurus
CBLC	Cbl proto-oncogene C(CBLC)	Bos taurus
LOC528412	multidrug resistance-associated protein 4(LOC528412)	Bos taurus
FAM126B	family with sequence similarity 126 member B(FAM126B)	Bos taurus
OSBPL2	oxysterol binding protein like 2(OSBPL2)	Bos taurus
DOCK1	dedicator of cytokinesis 1(DOCK1)	Bos taurus
CAMK1	calcium/calmodulin dependent protein kinase I(CAMK1)	Bos taurus
FLVCR1	feline leukemia virus subgroup C cellular receptor 1(FLVCR1)	Bos taurus
PHOSPHO1	phosphoethanolamine/phosphocholine phosphatase(PHOSPHO1)	Bos taurus
MPL	MPL proto-oncogene, thrombopoietin receptor(MPL)	Bos taurus
SLIT3	slit guidance ligand 3(SLIT3)	Bos taurus
TIGD2	tigger transposable element derived 2(TIGD2)	Bos taurus
FAM221A	family with sequence similarity 221, member A(FAM221A)	Bos taurus
RENBP	renin binding protein(RENBP)	Bos taurus
CSTB	cystatin B (stefin B)(CSTB)	Bos taurus
PTPN9	protein tyrosine phosphatase, non-receptor type 9(PTPN9)	Bos taurus
DTX4	deltex E3 ubiquitin ligase 4(DTX4)	Bos taurus
TTC39B	tetratricopeptide repeat domain 39B(TTC39B)	Bos taurus
KRTAP17-1	keratin associated protein 17-1(KRTAP17-1)	Bos taurus
FAM57A	family with sequence similarity 57 member A(FAM57A)	Bos taurus
CTDSP1	CTD small phosphatase 1(CTDSP1)	Bos taurus
RALB	RAS like proto-oncogene B(RALB)	Bos taurus
GDPD1	glycerophosphodiester phosphodiesterase domain containing 1(GDPD1)	Bos taurus
FGD4	FYVE, RhoGEF and PH domain containing 4(FGD4)	Bos taurus
DCBLD2	discoidin, CUB and LCCL domain containing 2(DCBLD2)	Bos taurus
ARL13A	ADP ribosylation factor like GTPase 13A(ARL13A)	Bos taurus
ARL13B	ADP ribosylation factor like GTPase 13B(ARL13B)	Bos taurus
SFXN4	sideroflexin 4(SFXN4)	Bos taurus
SMG7	SMG7, nonsense mediated mRNA decay factor(SMG7)	Bos taurus
GYG2	glycogenin 2(GYG2)	Bos taurus
TIMP2	TIMP metallopeptidase inhibitor 2(TIMP2)	Bos taurus
FAM102A	family with sequence similarity 102 member A(FAM102A)	Bos taurus
TIMP1	TIMP metallopeptidase inhibitor 1(TIMP1)	Bos taurus
SFN	stratifin(SFN)	Bos taurus
LSS	lanosterol synthase (2,3-oxidosqualene-lanosterol cyclase)(LSS)	Bos taurus
RAB33A	RAB33A, member RAS oncogene family(RAB33A)	Bos taurus
TGFB1	transforming growth factor beta 1(TGFB1)	Bos taurus
PPP1R16B	protein phosphatase 1 regulatory subunit 16B(PPP1R16B)	Bos taurus
IFI30	IFI30, lysosomal thiol reductase(IFI30)	Bos taurus
PRR5	proline rich 5(PRR5)	Bos taurus
PCNX	pecanex homolog (Drosophila)(PCNX)	Bos taurus
SLCO4C1	solute carrier organic anion transporter family member 4C1(SLCO4C1)	Bos taurus
HK2	hexokinase 2(HK2)	Bos taurus
GJB6	gap junction protein beta 6(GJB6)	Bos taurus
GULP1	GULP, engulfment adaptor PTB domain containing 1(GULP1)	Bos taurus
STARD7	StAR related lipid transfer domain containing 7(STARD7)	Bos taurus
GADD45A	growth arrest and DNA damage inducible alpha(GADD45A)	Bos taurus
KLK6	kallikrein related peptidase 6(KLK6)	Bos taurus
CD48	CD48 molecule(CD48)	Bos taurus
CCL3	chemokine (C-C motif) ligand 3(CCL3)	Bos taurus
STAP2	signal transducing adaptor family member 2(STAP2)	Bos taurus
FAM83H	family with sequence similarity 83 member H(FAM83H)	Bos taurus
GBA	glucosylceramidase beta(GBA)	Bos taurus
XKRX	XK related, X-linked(XKRX)	Bos taurus
FOXN3	forkhead box N3(FOXN3)	Bos taurus
SNX6	sorting nexin 6(SNX6)	Bos taurus
ACP5	acid phosphatase 5, tartrate resistant(ACP5)	Bos taurus
CAMK2G	calcium/calmodulin dependent protein kinase II gamma(CAMK2G)	Bos taurus
CACNB3	calcium voltage-gated channel auxiliary subunit beta 3(CACNB3)	Bos taurus
SLC27A6	solute carrier family 27 member 6(SLC27A6)	Bos taurus
PC	Milk protein content(PC)	Bos taurus
SLX4	SLX4 structure-specific endonuclease subunit(SLX4)	Bos taurus
GLT8D1	glycosyltransferase 8 domain containing 1(GLT8D1)	Bos taurus
BCL2A1	BCL2 related protein A1(BCL2A1)	Bos taurus
PMM1	phosphomannomutase 1(PMM1)	Bos taurus
PLVAP	plasmalemma vesicle associated protein(PLVAP)	Bos taurus
BCKDHA	branched chain keto acid dehydrogenase E1, alpha polypeptide(BCKDHA)	Bos taurus
ATP2B4	ATPase plasma membrane Ca2+ transporting 4(ATP2B4)	Bos taurus
MIR106B	microRNA 106b(MIR106B)	Bos taurus
IL6	interleukin 6 (interferon, beta 2)(IL6)	Bos taurus
ANGPT2	angiopoietin 2(ANGPT2)	Bos taurus
ANXA11	annexin A11(ANXA11)	Bos taurus
SHROOM1	shroom family member 1(SHROOM1)	Bos taurus
MAP3K12	mitogen-activated protein kinase kinase kinase 12(MAP3K12)	Bos taurus
ZSWIM1	zinc finger SWIM-type containing 1(ZSWIM1)	Bos taurus
MIR141	microRNA 141(MIR141)	Bos taurus
BCL2L14	BCL2 like 14(BCL2L14)	Bos taurus
TNFAIP8	TNF alpha induced protein 8(TNFAIP8)	Bos taurus
CAMK2D	calcium/calmodulin dependent protein kinase II delta(CAMK2D)	Bos taurus
ACADVL	acyl-CoA dehydrogenase, very long chain(ACADVL)	Bos taurus
ADAMTS9	ADAM metallopeptidase with thrombospondin type 1 motif 9(ADAMTS9)	Bos taurus
MIR24-1	microRNA 24-1(MIR24-1)	Bos taurus
VEGFC	vascular endothelial growth factor C(VEGFC)	Bos taurus
VLDLR	very low density lipoprotein receptor(VLDLR)	Bos taurus
PSMG4	proteasome assembly chaperone 4(PSMG4)	Bos taurus
VCAM1	vascular cell adhesion molecule 1(VCAM1)	Bos taurus
SMOC1	SPARC related modular calcium binding 1(SMOC1)	Bos taurus
VPS53	VPS53, GARP complex subunit(VPS53)	Bos taurus
STK19	serine/threonine kinase 19(STK19)	Bos taurus
SLMAP	sarcolemma associated protein(SLMAP)	Bos taurus
AK4	adenylate kinase 4(AK4)	Bos taurus
NFAM1	NFAT activating protein with ITAM motif 1(NFAM1)	Bos taurus
LOC785069	olfactory receptor 1052-like(LOC785069)	Bos taurus
ZDHHC1	zinc finger DHHC-type containing 1(ZDHHC1)	Bos taurus
MINOS1	mitochondrial inner membrane organizing system 1(MINOS1)	Bos taurus
EPB41L3	erythrocyte membrane protein band 4.1 like 3(EPB41L3)	Bos taurus
LOC616063	myeloid-associated differentiation marker(LOC616063)	Bos taurus
TADA2A	transcriptional adaptor 2A(TADA2A)	Bos taurus
LOC537017	cytidine monophosphate-N-acetylneuraminic acid hydroxylase(LOC537017)	Bos taurus
MIR340	microRNA 340(MIR340)	Bos taurus
DNASE1	deoxyribonuclease 1(DNASE1)	Bos taurus
ENTPD1	ectonucleoside triphosphate diphosphohydrolase 1(ENTPD1)	Bos taurus
DOCK9	dedicator of cytokinesis 9(DOCK9)	Bos taurus
FUT10	fucosyltransferase 10(FUT10)	Bos taurus
NRAP	nebulin related anchoring protein(NRAP)	Bos taurus
MIR505	microRNA 505(MIR505)	Bos taurus
JMJD7	jumonji domain containing 7(JMJD7)	Bos taurus
IL34	interleukin 34(IL34)	Bos taurus
NOL4	nucleolar protein 4(NOL4)	Bos taurus
MAN1A2	mannosidase alpha class 1A member 2(MAN1A2)	Bos taurus
LOC789022	olfactory receptor, family 2, subfamily T, member 1-like(LOC789022)	Bos taurus
CORO2B	coronin, actin binding protein, 2B(CORO2B)	Bos taurus
CAPN5	calpain 5(CAPN5)	Bos taurus
USP48	ubiquitin specific peptidase 48(USP48)	Bos taurus
ABCC2	ATP binding cassette subfamily C member 2(ABCC2)	Bos taurus
NT5DC3	5'-nucleotidase domain containing 3(NT5DC3)	Bos taurus
KLHL28	kelch like family member 28(KLHL28)	Bos taurus
COL1A1	collagen type I alpha 1 chain(COL1A1)	Bos taurus
MICAL1	microtubule associated monooxygenase, calponin and LIM domain containing 1(MICAL1)	Bos taurus
COL1A2	collagen type I alpha 2 chain(COL1A2)	Bos taurus
ITIH2	inter-alpha-trypsin inhibitor heavy chain 2(ITIH2)	Bos taurus
ATMIN	ATM interactor(ATMIN)	Bos taurus
SYT9	synaptotagmin 9(SYT9)	Bos taurus
DHTKD1	dehydrogenase E1 and transketolase domain containing 1(DHTKD1)	Bos taurus
FMNL1	formin like 1(FMNL1)	Bos taurus
ADAMTS1	ADAM metallopeptidase with thrombospondin type 1 motif 1(ADAMTS1)	Bos taurus
ANTXR1	anthrax toxin receptor 1(ANTXR1)	Bos taurus
PLEKHD1	pleckstrin homology and coiled-coil domain containing D1(PLEKHD1)	Bos taurus
CITED1	Cbp/p300 interacting transactivator with Glu/Asp rich carboxy-terminal domain 1(CITED1)	Bos taurus
HYOU1	hypoxia up-regulated 1(HYOU1)	Bos taurus
B3GNT3	UDP-GlcNAc:betaGal beta-1,3-N-acetylglucosaminyltransferase 3(B3GNT3)	Bos taurus
CHN1	chimerin 1(CHN1)	Bos taurus
MCF2L	MCF.2 cell line derived transforming sequence like(MCF2L)	Bos taurus
PC	pyruvate carboxylase(PC)	Bos taurus
LOC616127	60S ribosomal protein L21 pseudogene(LOC616127)	Bos taurus
GABARAPL1	GABA type A receptor associated protein like 1(GABARAPL1)	Bos taurus
PECAM1	platelet and endothelial cell adhesion molecule 1(PECAM1)	Bos taurus
AFF1	AF4/FMR2 family member 1(AFF1)	Bos taurus
PDGFRA	platelet derived growth factor receptor alpha(PDGFRA)	Bos taurus
LOC536947	pregnancy-associated glycoprotein 1-like(LOC536947)	Bos taurus
AAK1	AP2 associated kinase 1(AAK1)	Bos taurus
ALPK3	alpha kinase 3(ALPK3)	Bos taurus
CLEC1A	C-type lectin domain family 1 member A(CLEC1A)	Bos taurus
ALDH1L2	aldehyde dehydrogenase 1 family member L2(ALDH1L2)	Bos taurus
PRDM2	PR/SET domain 2(PRDM2)	Bos taurus
ACBD7	acyl-CoA binding domain containing 7(ACBD7)	Bos taurus
GRAMD1C	GRAM domain containing 1C(GRAMD1C)	Bos taurus
MGAT4A	mannosyl (alpha-1,3-)-glycoprotein beta-1,4-N-acetylglucosaminyltransferase, isozyme A(MGAT4A)	Bos taurus
WWC2	WW and C2 domain containing 2(WWC2)	Bos taurus
FA2H	fatty acid 2-hydroxylase(FA2H)	Bos taurus
PTPRF	protein tyrosine phosphatase, receptor type F(PTPRF)	Bos taurus
TRIM62	tripartite motif containing 62(TRIM62)	Bos taurus
TMC6	transmembrane channel like 6(TMC6)	Bos taurus
CD59	CD59 molecule(CD59)	Bos taurus
DOCK5	dedicator of cytokinesis 5(DOCK5)	Bos taurus
SLC25A15	solute carrier family 25 member 15(SLC25A15)	Bos taurus
LOC100297302	chromosome 16 open reading frame, human C1orf21 pseudogene(LOC100297302)	Bos taurus
CLCN2	chloride voltage-gated channel 2(CLCN2)	Bos taurus
SGPP1	sphingosine-1-phosphate phosphatase 1(SGPP1)	Bos taurus
EXOC7	exocyst complex component 7(EXOC7)	Bos taurus
IGFBP3	insulin like growth factor binding protein 3(IGFBP3)	Bos taurus
RNASE4	ribonuclease A family member 4(RNASE4)	Bos taurus
IFNAR2	interferon alpha and beta receptor subunit 2(IFNAR2)	Bos taurus
KCNK1	potassium two pore domain channel subfamily K member 1(KCNK1)	Bos taurus
SLC10A5	solute carrier family 10 (sodium/bile acid cotransporter family), member 5(SLC10A5)	Bos taurus
PLA2G15	phospholipase A2 group XV(PLA2G15)	Bos taurus
PPARGC1A	PPARG coactivator 1 alpha(PPARGC1A)	Bos taurus
UHRF1BP1L	UHRF1 binding protein 1 like(UHRF1BP1L)	Bos taurus
COX18	COX18 cytochrome c oxidase assembly homolog (S. cerevisiae)(COX18)	Bos taurus
PPP1R36	protein phosphatase 1 regulatory subunit 36(PPP1R36)	Bos taurus
BSDC1	BSD domain containing 1(BSDC1)	Bos taurus
PRPF39	pre-mRNA processing factor 39(PRPF39)	Bos taurus
VSTM5	V-set and transmembrane domain containing 5(VSTM5)	Bos taurus
CDYL2	chromodomain Y-like 2(CDYL2)	Bos taurus
RNASET2	ribonuclease T2(RNASET2)	Bos taurus
MSI2	musashi RNA binding protein 2(MSI2)	Bos taurus
SLC6A11	solute carrier family 6 member 11(SLC6A11)	Bos taurus
PREX2	phosphatidylinositol-3,4,5-trisphosphate dependent Rac exchange factor 2(PREX2)	Bos taurus
RRM1	ribonucleotide reductase catalytic subunit M1(RRM1)	Bos taurus
HMGXB4	HMG-box containing 4(HMGXB4)	Bos taurus
TBC1D16	TBC1 domain family member 16(TBC1D16)	Bos taurus
STX12	syntaxin 12(STX12)	Bos taurus
SLC1A3	solute carrier family 1 member 3(SLC1A3)	Bos taurus
SLC1A5	solute carrier family 1 member 5(SLC1A5)	Bos taurus
SLC2A3	solute carrier family 2 member 3(SLC2A3)	Bos taurus
SLC2A1	solute carrier family 2 member 1(SLC2A1)	Bos taurus
LIPH	lipase H(LIPH)	Bos taurus
GREB1	growth regulation by estrogen in breast cancer 1(GREB1)	Bos taurus
YPEL2	yippee like 2(YPEL2)	Bos taurus
SLC39A8	solute carrier family 39 member 8(SLC39A8)	Bos taurus
PIEZO1	piezo type mechanosensitive ion channel component 1(PIEZO1)	Bos taurus
SLC6A6	solute carrier family 6 member 6(SLC6A6)	Bos taurus
SLC6A4	solute carrier family 6 member 4(SLC6A4)	Bos taurus
SATB1	SATB homeobox 1(SATB1)	Bos taurus
RNASE6	ribonuclease A family member k6(RNASE6)	Bos taurus
IRF7	interferon regulatory factor 7(IRF7)	Bos taurus
RNASE1	ribonuclease, RNase A family, 1 (pancreatic)(RNASE1)	Bos taurus
COMP	Muscle compression(COMP)	Bos taurus
SCARB1	scavenger receptor class B member 1(SCARB1)	Bos taurus
S100A7	S100 calcium binding protein A7(S100A7)	Bos taurus
PIBF1	progesterone immunomodulatory binding factor 1(PIBF1)	Bos taurus
ST3GAL1	ST3 beta-galactoside alpha-2,3-sialyltransferase 1(ST3GAL1)	Bos taurus
TMEM8A	transmembrane protein 8A(TMEM8A)	Bos taurus
SCNN1A	sodium channel epithelial 1 alpha subunit(SCNN1A)	Bos taurus
QTRT1	queuine tRNA-ribosyltransferase catalytic subunit 1(QTRT1)	Bos taurus
TLCD1	TLC domain containing 1(TLCD1)	Bos taurus
MCEE	methylmalonyl-CoA epimerase(MCEE)	Bos taurus
PRKCB	protein kinase C beta(PRKCB)	Bos taurus
ASCC2	activating signal cointegrator 1 complex subunit 2(ASCC2)	Bos taurus
LOC781112	P antigen family, member 3 (prostate associated)-like(LOC781112)	Bos taurus
PTGER3	prostaglandin E receptor 3(PTGER3)	Bos taurus
PTGER4	prostaglandin E receptor 4(PTGER4)	Bos taurus
SLC46A3	solute carrier family 46 member 3(SLC46A3)	Bos taurus
SLC23A1	solute carrier family 23 member 1(SLC23A1)	Bos taurus
FHDC1	FH2 domain containing 1(FHDC1)	Bos taurus
AS3MT	arsenite methyltransferase(AS3MT)	Bos taurus
PI4KA	phosphatidylinositol 4-kinase alpha(PI4KA)	Bos taurus
PLA2G4B	phospholipase A2, group IVB (cytosolic)(PLA2G4B)	Bos taurus
PIK3R2	phosphoinositide-3-kinase regulatory subunit 2(PIK3R2)	Bos taurus
TRIM66	tripartite motif containing 66(TRIM66)	Bos taurus
PLA2G7	phospholipase A2 group VII(PLA2G7)	Bos taurus
PYGL	phosphorylase, glycogen, liver(PYGL)	Bos taurus
PRSS12	protease, serine 12(PRSS12)	Bos taurus
PPIL1	peptidylprolyl isomerase like 1(PPIL1)	Bos taurus
SLC35A1	solute carrier family 35 member A1(SLC35A1)	Bos taurus
PHTF2	putative homeodomain transcription factor 2(PHTF2)	Bos taurus
PTPRJ	protein tyrosine phosphatase, receptor type J(PTPRJ)	Bos taurus
PTPRB	protein tyrosine phosphatase, receptor type B(PTPRB)	Bos taurus
ZZEF1	zinc finger ZZ-type and EF-hand domain containing 1(ZZEF1)	Bos taurus
SSBP4	single stranded DNA binding protein 4(SSBP4)	Bos taurus
ROBO1	roundabout guidance receptor 1(ROBO1)	Bos taurus
B4GALT5	beta-1,4-galactosyltransferase 5(B4GALT5)	Bos taurus
JAK2	Janus kinase 2(JAK2)	Bos taurus
LOC100125266	alkaline phosphatase-like(LOC100125266)	Bos taurus
LIPA	lipase A, lysosomal acid type(LIPA)	Bos taurus
GALNT4	polypeptide N-acetylgalactosaminyltransferase 4(GALNT4)	Bos taurus
GCLC	glutamate-cysteine ligase catalytic subunit(GCLC)	Bos taurus
NAGK	N-acetylglucosamine kinase(NAGK)	Bos taurus
SDC4	syndecan 4(SDC4)	Bos taurus
LOC512464	solute carrier family 11 (proton-coupled divalent metal ion transporters), member 2-like(LOC512464)	Bos taurus
LOC785386	60S ribosomal protein L10(LOC785386)	Bos taurus
ARHGEF10L	Rho guanine nucleotide exchange factor 10 like(ARHGEF10L)	Bos taurus
SLC18B1	solute carrier family 18 member B1(SLC18B1)	Bos taurus
PAGE4	PAGE family member 4(PAGE4)	Bos taurus
TOMM34	translocase of outer mitochondrial membrane 34(TOMM34)	Bos taurus
TGFBR1	transforming growth factor beta receptor 1(TGFBR1)	Bos taurus
KCTD5	potassium channel tetramerization domain containing 5(KCTD5)	Bos taurus
B3GALNT2	beta-1,3-N-acetylgalactosaminyltransferase 2(B3GALNT2)	Bos taurus
NME4	NME/NM23 nucleoside diphosphate kinase 4(NME4)	Bos taurus
TYK2	tyrosine kinase 2(TYK2)	Bos taurus
STXBP1	syntaxin binding protein 1(STXBP1)	Bos taurus
CCNT2	cyclin T2(CCNT2)	Bos taurus
EMB	embigin(EMB)	Bos taurus
S100A16	S100 calcium binding protein A16(S100A16)	Bos taurus
KIAA2022	KIAA2022 ortholog(KIAA2022)	Bos taurus
STXBP3	syntaxin binding protein 3(STXBP3)	Bos taurus
SLC6A9	solute carrier family 6 (neurotransmitter transporter, glycine), member 9(SLC6A9)	Bos taurus
PLS3	plastin 3(PLS3)	Bos taurus
LAD1	ladinin 1(LAD1)	Bos taurus
LOC508098	uncharacterized LOC508098(LOC508098)	Bos taurus
FBXL2	F-box and leucine rich repeat protein 2(FBXL2)	Bos taurus
LOC508096	uncharacterized LOC508096(LOC508096)	Bos taurus
TYROBP	TYRO protein tyrosine kinase binding protein(TYROBP)	Bos taurus
GZF1	GDNF inducible zinc finger protein 1(GZF1)	Bos taurus
OOSP1	oocyte secreted protein 1, pseudogene(OOSP1)	Bos taurus
FXN	frataxin(FXN)	Bos taurus
B4GALNT2	beta-1,4-N-acetyl-galactosaminyltransferase 2(B4GALNT2)	Bos taurus
NAB1	NGFI-A binding protein 1(NAB1)	Bos taurus
RANGRF	RAN guanine nucleotide release factor(RANGRF)	Bos taurus
PNPLA3	patatin-like phospholipase domain containing 3(PNPLA3)	Bos taurus
TNFAIP3	TNF alpha induced protein 3(TNFAIP3)	Bos taurus
SLC23A1	solute carrier family 23 (nucleobase transporters), member 2(SLC23A1)	Bos taurus
ANG	Angularity(ANG)	Bos taurus
ERGIC1	endoplasmic reticulum-golgi intermediate compartment 1(ERGIC1)	Bos taurus
SLC25A1	solute carrier family 25 member 1(SLC25A1)	Bos taurus
GGH	gamma-glutamyl hydrolase(GGH)	Bos taurus
PLEKHA5	pleckstrin homology domain containing A5(PLEKHA5)	Bos taurus
AGAP3	ArfGAP with GTPase domain, ankyrin repeat and PH domain 3(AGAP3)	Bos taurus
PLTP	phospholipid transfer protein(PLTP)	Bos taurus
NDE1	nudE neurodevelopment protein 1(NDE1)	Bos taurus
S100A10	S100 calcium binding protein A10(S100A10)	Bos taurus
SLC10A1	solute carrier family 10 member 1(SLC10A1)	Bos taurus
MAML2	mastermind like transcriptional coactivator 2(MAML2)	Bos taurus
SLCO2A1	solute carrier organic anion transporter family member 2A1(SLCO2A1)	Bos taurus
TTC39C	tetratricopeptide repeat domain 39C(TTC39C)	Bos taurus
ANG	Angularity(ANG)	Bos taurus
MGC134577	exonuclease NEF-sp(MGC134577)	Bos taurus
ARHGAP27	Rho GTPase activating protein 27(ARHGAP27)	Bos taurus
SLC30A4	solute carrier family 30 (zinc transporter), member 4(SLC30A4)	Bos taurus
LOC521214	apolipoprotein L3(LOC521214)	Bos taurus
IGF2BP1	insulin like growth factor 2 mRNA binding protein 1(IGF2BP1)	Bos taurus
DAPK2	death associated protein kinase 2(DAPK2)	Bos taurus
MCPH1	microcephalin 1(MCPH1)	Bos taurus
PPP1R12C	protein phosphatase 1 regulatory subunit 12C(PPP1R12C)	Bos taurus
ID1	inhibitor of DNA binding 1, HLH protein(ID1)	Bos taurus
LOC616272	Interferon alpha-1-like(LOC616272)	Bos taurus
ANG	Angularity(ANG)	Bos taurus
GRAMD3	GRAM domain containing 3(GRAMD3)	Bos taurus
PM20D2	peptidase M20 domain containing 2(PM20D2)	Bos taurus
PREB	prolactin regulatory element binding(PREB)	Bos taurus
CCR5	C-C motif chemokine receptor 5(CCR5)	Bos taurus
GNS	glucosamine (N-acetyl)-6-sulfatase(GNS)	Bos taurus
SLC15A1	solute carrier family 15 member 1(SLC15A1)	Bos taurus
ST8SIA5	ST8 alpha-N-acetyl-neuraminide alpha-2,8-sialyltransferase 5(ST8SIA5)	Bos taurus
SLC39A10	solute carrier family 39 member 10(SLC39A10)	Bos taurus
RASA3	RAS p21 protein activator 3(RASA3)	Bos taurus
LPAR3	lysophosphatidic acid receptor 3(LPAR3)	Bos taurus
EMCN	endomucin(EMCN)	Bos taurus
LOC100297566	ribosomal protein S27-like pseudogene(LOC100297566)	Bos taurus
PODXL	podocalyxin like(PODXL)	Bos taurus
MTHFR	methylenetetrahydrofolate reductase (NAD(P)H)(MTHFR)	Bos taurus
SLC2A12	solute carrier family 2 member 12(SLC2A12)	Bos taurus
DOCK6	dedicator of cytokinesis 6(DOCK6)	Bos taurus
PTCH1	patched 1(PTCH1)	Bos taurus
FREM1	FRAS1 related extracellular matrix 1(FREM1)	Bos taurus
YAF2	YY1 associated factor 2(YAF2)	Bos taurus
EVI2A	ecotropic viral integration site 2A(EVI2A)	Bos taurus
SLC4A5	solute carrier family 4 member 5(SLC4A5)	Bos taurus
MED12	mediator complex subunit 12(MED12)	Bos taurus
BRPF3	bromodomain and PHD finger containing 3(BRPF3)	Bos taurus
NUDT8	nudix hydrolase 8(NUDT8)	Bos taurus
FAM160A1	family with sequence similarity 160 member A1(FAM160A1)	Bos taurus
NENF	neudesin neurotrophic factor(NENF)	Bos taurus
FAM65C	family with sequence similarity 65 member C(FAM65C)	Bos taurus
TANC1	tetratricopeptide repeat, ankyrin repeat and coiled-coil containing 1(TANC1)	Bos taurus
ATP1B3	ATPase Na+/K+ transporting subunit beta 3(ATP1B3)	Bos taurus
TNFRSF1A	TNF receptor superfamily member 1A(TNFRSF1A)	Bos taurus
MRGPRX2	MAS-related GPR, member X2(MRGPRX2)	Bos taurus
SLC25A16	solute carrier family 25 member 16(SLC25A16)	Bos taurus
AHCYL2	adenosylhomocysteinase like 2(AHCYL2)	Bos taurus
PCGF5	polycomb group ring finger 5(PCGF5)	Bos taurus
TRPC4AP	transient receptor potential cation channel subfamily C member 4 associated protein(TRPC4AP)	Bos taurus
STARD5	StAR related lipid transfer domain containing 5(STARD5)	Bos taurus
SLCO4A1	solute carrier organic anion transporter family member 4A1(SLCO4A1)	Bos taurus
ARHGAP9	Rho GTPase activating protein 9(ARHGAP9)	Bos taurus
PRPSAP1	phosphoribosyl pyrophosphate synthetase associated protein 1(PRPSAP1)	Bos taurus
OVOL2	ovo like zinc finger 2(OVOL2)	Bos taurus
PRKX	protein kinase, X-linked(PRKX)	Bos taurus
ANG	Angularity(ANG)	Bos taurus
ZMYND12	zinc finger MYND-type containing 12(ZMYND12)	Bos taurus
UNC80	unc-80 homolog, NALCN activator(UNC80)	Bos taurus
FAM13A	family with sequence similarity 13 member A(FAM13A)	Bos taurus
FDXR	ferredoxin reductase(FDXR)	Bos taurus
UBE2O	ubiquitin conjugating enzyme E2 O(UBE2O)	Bos taurus
KCTD12	potassium channel tetramerization domain containing 12(KCTD12)	Bos taurus
ZCCHC11	zinc finger CCHC-type containing 11(ZCCHC11)	Bos taurus
ABCA3	ATP binding cassette subfamily A member 3(ABCA3)	Bos taurus
THYN1	thymocyte nuclear protein 1(THYN1)	Bos taurus
GLA	galactosidase alpha(GLA)	Bos taurus
MGC152281	uncharacterized LOC507942(MGC152281)	Bos taurus
TBC1D24	TBC1 domain family member 24(TBC1D24)	Bos taurus
RMND5A	required for meiotic nuclear division 5 homolog A(RMND5A)	Bos taurus
MCOLN1	mucolipin 1(MCOLN1)	Bos taurus
CCSAP	centriole, cilia and spindle associated protein(CCSAP)	Bos taurus
TMEM206	transmembrane protein 206(TMEM206)	Bos taurus
ITGB5	integrin subunit beta 5(ITGB5)	Bos taurus
POC1B	POC1 centriolar protein B(POC1B)	Bos taurus
MALL	mal, T-cell differentiation protein like(MALL)	Bos taurus
APPBP2	amyloid beta precursor protein binding protein 2(APPBP2)	Bos taurus
ATP2A3	ATPase sarcoplasmic/endoplasmic reticulum Ca2+ transporting 3(ATP2A3)	Bos taurus
ANG	Angularity(ANG)	Bos taurus
NDFIP2	Nedd4 family interacting protein 2(NDFIP2)	Bos taurus
PLEKHA6	pleckstrin homology domain containing, family A member 6(PLEKHA6)	Bos taurus
MMRN2	multimerin 2(MMRN2)	Bos taurus
C15H11orf52	chromosome 15 open reading frame, human C11orf52(C15H11orf52)	Bos taurus
SUOX	sulfite oxidase(SUOX)	Bos taurus
VPS13D	vacuolar protein sorting 13 homolog D (S. cerevisiae)(VPS13D)	Bos taurus
NFAT5	nuclear factor of activated T-cells 5(NFAT5)	Bos taurus
KCNN3	potassium calcium-activated channel subfamily N member 3(KCNN3)	Bos taurus
IER3IP1	immediate early response 3 interacting protein 1(IER3IP1)	Bos taurus
OSGIN1	oxidative stress induced growth inhibitor 1(OSGIN1)	Bos taurus
ZMAT3	zinc finger matrin-type 3(ZMAT3)	Bos taurus
MNAT1	MNAT1, CDK activating kinase assembly factor(MNAT1)	Bos taurus
CEACAM1	carcinoembryonic antigen related cell adhesion molecule 1(CEACAM1)	Bos taurus
KRR1	KRR1, small subunit processome component homolog(KRR1)	Bos taurus
ETFDH	electron transfer flavoprotein dehydrogenase(ETFDH)	Bos taurus
WASF3	WAS protein family member 3(WASF3)	Bos taurus
PLEKHA6	pleckstrin homology domain containing A6(PLEKHA6)	Bos taurus
POLR2I	RNA polymerase II subunit I(POLR2I)	Bos taurus
IRF9	interferon regulatory factor 9(IRF9)	Bos taurus
TUBB6	tubulin beta 6 class V(TUBB6)	Bos taurus
BCAS3	BCAS3, microtubule associated cell migration factor(BCAS3)	Bos taurus
KIAA0182	KIAA0182 ortholog(KIAA0182)	Bos taurus
GRK6	G protein-coupled receptor kinase 6(GRK6)	Bos taurus
ITIH4	inter-alpha-trypsin inhibitor heavy chain family member 4(ITIH4)	Bos taurus
ZNF451	zinc finger protein 451(ZNF451)	Bos taurus
CABP1	calcium binding protein 1(CABP1)	Bos taurus
USP27X	ubiquitin specific peptidase 27, X-linked(USP27X)	Bos taurus
TRAPPC6B	trafficking protein particle complex 6B(TRAPPC6B)	Bos taurus
RHOG	ras homolog family member G(RHOG)	Bos taurus
CLDN3	claudin 3(CLDN3)	Bos taurus
TXNDC17	thioredoxin domain containing 17(TXNDC17)	Bos taurus
F9	coagulation factor IX(F9)	Bos taurus
OPTN	optineurin(OPTN)	Bos taurus
FANCL	Fanconi anemia complementation group L(FANCL)	Bos taurus
EBAG9	estrogen receptor binding site associated, antigen, 9(EBAG9)	Bos taurus
SESN2	sestrin 2(SESN2)	Bos taurus
PPA1	pyrophosphatase (inorganic) 1(PPA1)	Bos taurus
RAB11FIP2	RAB11 family interacting protein 2(RAB11FIP2)	Bos taurus
S100A2	S100 calcium binding protein A2(S100A2)	Bos taurus
NCOR2	nuclear receptor corepressor 2(NCOR2)	Bos taurus
TRANK1	tetratricopeptide repeat and ankyrin repeat containing 1(TRANK1)	Bos taurus
LOC503858	aromatase cytochrome P450 pseudogene(LOC503858)	Bos taurus
ETNK1	ethanolamine kinase 1(ETNK1)	Bos taurus
CASK	calcium/calmodulin dependent serine protein kinase(CASK)	Bos taurus
C16H1orf21	chromosome 16 open reading frame, human C1orf21(C16H1orf21)	Bos taurus
CADM1	cell adhesion molecule 1(CADM1)	Bos taurus
KSR1	kinase suppressor of ras 1(KSR1)	Bos taurus
ZC3H13	zinc finger CCCH-type containing 13(ZC3H13)	Bos taurus
ACER2	alkaline ceramidase 2(ACER2)	Bos taurus
RAB15	RAB15, member RAS oncogene family(RAB15)	Bos taurus
ENOPH1	enolase-phosphatase 1(ENOPH1)	Bos taurus
SAMSN1	SAM domain, SH3 domain and nuclear localization signals 1(SAMSN1)	Bos taurus
AR	androgen receptor(AR)	Bos taurus
ERI1	exoribonuclease 1(ERI1)	Bos taurus
F3	coagulation factor III, tissue factor(F3)	Bos taurus
GOLIM4	golgi integral membrane protein 4(GOLIM4)	Bos taurus
SLIT2	slit guidance ligand 2(SLIT2)	Bos taurus
SLC25A28	solute carrier family 25 member 28(SLC25A28)	Bos taurus
LRRC8B	leucine rich repeat containing 8 family member B(LRRC8B)	Bos taurus
ABHD4	abhydrolase domain containing 4(ABHD4)	Bos taurus
GABBR1	gamma-aminobutyric acid type B receptor subunit 1(GABBR1)	Bos taurus
BNC2	basonuclin 2(BNC2)	Bos taurus
SLC27A1	solute carrier family 27 member 1(SLC27A1)	Bos taurus
ZXDC	ZXD family zinc finger C(ZXDC)	Bos taurus
FOXO4	forkhead box O4(FOXO4)	Bos taurus
CTSZ	cathepsin Z(CTSZ)	Bos taurus
LOC614423	phosphoglycerate mutase 1-like(LOC614423)	Bos taurus
OSBPL11	oxysterol binding protein like 11(OSBPL11)	Bos taurus
RIMKLB	ribosomal modification protein rimK like family member B(RIMKLB)	Bos taurus
MTHFD2	methylenetetrahydrofolate dehydrogenase (NADP+ dependent) 2, methenyltetrahydrofolate cyclohydrolase(MTHFD2)	Bos taurus
FZD9	frizzled class receptor 9(FZD9)	Bos taurus
POLM	DNA polymerase mu(POLM)	Bos taurus
RAPGEF6	Rap guanine nucleotide exchange factor 6(RAPGEF6)	Bos taurus
PRPF40B	pre-mRNA processing factor 40 homolog B(PRPF40B)	Bos taurus
LYVE1	lymphatic vessel endothelial hyaluronan receptor 1(LYVE1)	Bos taurus
TBC1D22A	TBC1 domain family member 22A(TBC1D22A)	Bos taurus
NCR3	natural cytotoxicity triggering receptor 3(NCR3)	Bos taurus
PKIG	protein kinase (cAMP-dependent, catalytic) inhibitor gamma(PKIG)	Bos taurus
PHLDA2	pleckstrin homology like domain family A member 2(PHLDA2)	Bos taurus
C8H9orf24	chromosome 8 open reading frame, human C9orf24(C8H9orf24)	Bos taurus
AKAP12	A-kinase anchoring protein 12(AKAP12)	Bos taurus
KCNE2	potassium voltage-gated channel subfamily E regulatory subunit 2(KCNE2)	Bos taurus
GCNT3	glucosaminyl (N-acetyl) transferase 3, mucin type(GCNT3)	Bos taurus
GLIPR2	GLI pathogenesis related 2(GLIPR2)	Bos taurus
ST3GAL4	ST3 beta-galactoside alpha-2,3-sialyltransferase 4(ST3GAL4)	Bos taurus
AP1G2	adaptor related protein complex 1 gamma 2 subunit(AP1G2)	Bos taurus
LOC509911	monocarboxylate transporter 1(LOC509911)	Bos taurus
LOC785630	zinc finger protein 480-like(LOC785630)	Bos taurus
USP38	ubiquitin specific peptidase 38(USP38)	Bos taurus
ADCY9	adenylate cyclase 9(ADCY9)	Bos taurus
PAG1	phosphoprotein membrane anchor with glycosphingolipid microdomains 1(PAG1)	Bos taurus
FAM117A	family with sequence similarity 117 member A(FAM117A)	Bos taurus
RBM5	RNA binding motif protein 5(RBM5)	Bos taurus
TNFRSF19	TNF receptor superfamily member 19(TNFRSF19)	Bos taurus
CASC4	cancer susceptibility candidate 4(CASC4)	Bos taurus
PLCD4	phospholipase C delta 4(PLCD4)	Bos taurus
TMC7	transmembrane channel like 7(TMC7)	Bos taurus
RETSAT	retinol saturase(RETSAT)	Bos taurus
HEYL	hes related family bHLH transcription factor with YRPW motif-like(HEYL)	Bos taurus
MIPEP	mitochondrial intermediate peptidase(MIPEP)	Bos taurus
ZNF22	zinc finger protein 22(ZNF22)	Bos taurus
RGS20	regulator of G-protein signaling 20(RGS20)	Bos taurus
DAAM1	dishevelled associated activator of morphogenesis 1(DAAM1)	Bos taurus
ABI3BP	ABI family member 3 binding protein(ABI3BP)	Bos taurus
ACY1	aminoacylase 1(ACY1)	Bos taurus
DOCK4	dedicator of cytokinesis 4(DOCK4)	Bos taurus
KIAA0930	KIAA0930 ortholog(KIAA0930)	Bos taurus
TCEAL8	transcription elongation factor A like 8(TCEAL8)	Bos taurus
NOTCH2	notch 2(NOTCH2)	Bos taurus
ELFN1	extracellular leucine rich repeat and fibronectin type III domain containing 1(ELFN1)	Bos taurus
FAM171B	family with sequence similarity 171 member B(FAM171B)	Bos taurus
UHRF1BP1	UHRF1 binding protein 1(UHRF1BP1)	Bos taurus
CEP85	centrosomal protein 85(CEP85)	Bos taurus
ENTPD2	ectonucleoside triphosphate diphosphohydrolase 2(ENTPD2)	Bos taurus
IRS1	insulin receptor substrate 1(IRS1)	Bos taurus
SMARCD2	SWI/SNF related, matrix associated, actin dependent regulator of chromatin, subfamily d, member 2(SMARCD2)	Bos taurus
RNPC3	RNA binding region (RNP1, RRM) containing 3(RNPC3)	Bos taurus
NUDT6	nudix hydrolase 6(NUDT6)	Bos taurus
GAA	glucosidase alpha, acid(GAA)	Bos taurus
RP2	retinitis pigmentosa 2 (X-linked recessive)(RP2)	Bos taurus
LOC614614	sesquipedalian-1(LOC614614)	Bos taurus
FAM213A	family with sequence similarity 213 member A(FAM213A)	Bos taurus
THAP5	THAP domain containing 5(THAP5)	Bos taurus
CDK18	cyclin dependent kinase 18(CDK18)	Bos taurus
AWAT2	acyl-CoA wax alcohol acyltransferase 2(AWAT2)	Bos taurus
MYOF	myoferlin(MYOF)	Bos taurus
F12	coagulation factor XII(F12)	Bos taurus
FCHO2	FCH domain only 2(FCHO2)	Bos taurus
CEP55	centrosomal protein 55(CEP55)	Bos taurus
MOB3B	MOB kinase activator 3B(MOB3B)	Bos taurus
ANG	Angularity(ANG)	Bos taurus
PHYHD1	phytanoyl-CoA dioxygenase domain containing 1(PHYHD1)	Bos taurus
HHIP	hedgehog interacting protein(HHIP)	Bos taurus
AOAH	acyloxyacyl hydrolase(AOAH)	Bos taurus
RGS1	regulator of G-protein signaling 1(RGS1)	Bos taurus
PDPN	podoplanin(PDPN)	Bos taurus
IL6	interleukin 6(IL6)	Bos taurus
CSNK1E	casein kinase 1, epsilon(CSNK1E)	Bos taurus
EPS8	epidermal growth factor receptor pathway substrate 8(EPS8)	Bos taurus
TMEM63A	transmembrane protein 63A(TMEM63A)	Bos taurus
CYYR1	cysteine and tyrosine rich 1(CYYR1)	Bos taurus
PLCH1	phospholipase C eta 1(PLCH1)	Bos taurus
PCDHGA8	protocadherin gamma subfamily A, 8(PCDHGA8)	Bos taurus
ZYX	zyxin(ZYX)	Bos taurus
MILR1	mast cell immunoglobulin like receptor 1(MILR1)	Bos taurus
CTDSPL	CTD small phosphatase like(CTDSPL)	Bos taurus
HK1	hexokinase 1(HK1)	Bos taurus
NPC2	NPC intracellular cholesterol transporter 2(NPC2)	Bos taurus
HCK	HCK proto-oncogene, Src family tyrosine kinase(HCK)	Bos taurus
MGC157408	pregnancy-associated glycoprotein(MGC157408)	Bos taurus
LPAR2	lysophosphatidic acid receptor 2(LPAR2)	Bos taurus
LIMK2	LIM domain kinase 2(LIMK2)	Bos taurus
B3GNT6	UDP-GlcNAc:betaGal beta-1,3-N-acetylglucosaminyltransferase 6(B3GNT6)	Bos taurus
UCKL1	uridine-cytidine kinase 1 like 1(UCKL1)	Bos taurus
HMCN1	hemicentin 1(HMCN1)	Bos taurus
H6PD	hexose-6-phosphate dehydrogenase (glucose 1-dehydrogenase)(H6PD)	Bos taurus
PDRG1	p53 and DNA damage regulated 1(PDRG1)	Bos taurus
MICAL2	microtubule associated monooxygenase, calponin and LIM domain containing 2(MICAL2)	Bos taurus
CLCN7	chloride voltage-gated channel 7(CLCN7)	Bos taurus
PLEKHG4	pleckstrin homology domain containing, family G (with RhoGef domain) member 4(PLEKHG4)	Bos taurus
B2M	beta-2-microglobulin(B2M)	Bos taurus
SLC30A4	solute carrier family 30 member 4(SLC30A4)	Bos taurus
MKX	mohawk homeobox(MKX)	Bos taurus
BRB	brain ribonuclease(BRB)	Bos taurus
GLDN	gliomedin(GLDN)	Bos taurus
ZNF75A	zinc finger protein 75a(ZNF75A)	Bos taurus
DAPK1	death associated protein kinase 1(DAPK1)	Bos taurus
WDR75	WD repeat domain 75(WDR75)	Bos taurus
CDH11	cadherin 11(CDH11)	Bos taurus
KBTBD6	kelch repeat and BTB (POZ) domain containing 6(KBTBD6)	Bos taurus
TMEM54	transmembrane protein 54(TMEM54)	Bos taurus
ITPKB	inositol-trisphosphate 3-kinase B(ITPKB)	Bos taurus
ADM	adrenomedullin(ADM)	Bos taurus
ADA	adenosine deaminase(ADA)	Bos taurus
AK1	adenylate kinase 1(AK1)	Bos taurus
CELF2	CUGBP, Elav-like family member 2(CELF2)	Bos taurus
IGSF9B	immunoglobulin superfamily member 9B(IGSF9B)	Bos taurus
TET1	tet methylcytosine dioxygenase 1(TET1)	Bos taurus
MBOAT2	membrane bound O-acyltransferase domain containing 2(MBOAT2)	Bos taurus
NCKAP1L	NCK associated protein 1 like(NCKAP1L)	Bos taurus
PEX10	peroxisomal biogenesis factor 10(PEX10)	Bos taurus
RCC1	regulator of chromosome condensation 1(RCC1)	Bos taurus
PRKD3	protein kinase D3(PRKD3)	Bos taurus
PKD2L1	polycystin 2 like 1, transient receptor potential cation channel(PKD2L1)	Bos taurus
DDO	D-aspartate oxidase(DDO)	Bos taurus
ADAMTS3	ADAM metallopeptidase with thrombospondin type 1 motif 3(ADAMTS3)	Bos taurus
SULT1C4	sulfotransferase family, cytosolic, 1C, member 4(SULT1C4)	Bos taurus
POFUT2	protein O-fucosyltransferase 2(POFUT2)	Bos taurus
BIN1	bridging integrator 1(BIN1)	Bos taurus
RBMS2	RNA binding motif single stranded interacting protein 2(RBMS2)	Bos taurus
PRP6	prolactin-related protein VI(PRP6)	Bos taurus
DES	desmin(DES)	Bos taurus
DNAJB9	DnaJ heat shock protein family (Hsp40) member B9(DNAJB9)	Bos taurus
MAPK8IP2	mitogen-activated protein kinase 8 interacting protein 2(MAPK8IP2)	Bos taurus
ZC3HAV1	zinc finger CCCH-type containing, antiviral 1(ZC3HAV1)	Bos taurus
SIPA1L3	signal induced proliferation associated 1 like 3(SIPA1L3)	Bos taurus
LAP3	leucine aminopeptidase 3(LAP3)	Bos taurus
DBT	dihydrolipoamide branched chain transacylase E2(DBT)	Bos taurus
MPPED2	metallophosphoesterase domain containing 2(MPPED2)	Bos taurus
CD5	CD5 molecule(CD5)	Bos taurus
SPG21	spastic paraplegia 21 (autosomal recessive, Mast syndrome)(SPG21)	Bos taurus
TRIB3	tribbles pseudokinase 3(TRIB3)	Bos taurus
CASKIN1	CASK interacting protein 1(CASKIN1)	Bos taurus
CSDC2	cold shock domain containing C2(CSDC2)	Bos taurus
GTPBP2	GTP binding protein 2(GTPBP2)	Bos taurus
SLC16A7	solute carrier family 16 member 7(SLC16A7)	Bos taurus
PRKAB1	protein kinase AMP-activated non-catalytic subunit beta 1(PRKAB1)	Bos taurus
PTDSS1	phosphatidylserine synthase 1(PTDSS1)	Bos taurus
TKDP4	trophoblast Kunitz domain protein 4(TKDP4)	Bos taurus
KCNJ12	potassium voltage-gated channel subfamily J member 12(KCNJ12)	Bos taurus
PALMD	palmdelphin(PALMD)	Bos taurus
FAM83F	family with sequence similarity 83 member F(FAM83F)	Bos taurus
PCMTD1	protein-L-isoaspartate (D-aspartate) O-methyltransferase domain containing 1(PCMTD1)	Bos taurus
ANG	Angularity(ANG)	Bos taurus
MNX1	motor neuron and pancreas homeobox 1(MNX1)	Bos taurus
ANG	Angularity(ANG)	Bos taurus
PRL	prolactin(PRL)	Bos taurus
ANG	Angularity(ANG)	Bos taurus
FAM109A	family with sequence similarity 109 member A(FAM109A)	Bos taurus
FTO	FTO, alpha-ketoglutarate dependent dioxygenase(FTO)	Bos taurus
PTN	pleiotrophin(PTN)	Bos taurus
SLC26A2	solute carrier family 26 member 2(SLC26A2)	Bos taurus
CD19	CD19 molecule(CD19)	Bos taurus
NIPAL2	NIPA like domain containing 2(NIPAL2)	Bos taurus
C8G	complement C8 gamma chain(C8G)	Bos taurus
FBXW5	F-box and WD repeat domain containing 5(FBXW5)	Bos taurus
THSD4	thrombospondin type 1 domain containing 4(THSD4)	Bos taurus
RBAK	RB associated KRAB zinc finger(RBAK)	Bos taurus
PDZK1	PDZ domain containing 1(PDZK1)	Bos taurus
DBI	diazepam binding inhibitor, acyl-CoA binding protein(DBI)	Bos taurus
NOX1	NADPH oxidase 1(NOX1)	Bos taurus
SST	somatostatin(SST)	Bos taurus
SLC36A2	solute carrier family 36 member 2(SLC36A2)	Bos taurus
ME1	malic enzyme 1(ME1)	Bos taurus
RNASE1	ribonuclease, RNase A family, 1 (pancreatic)(RNASE1)	Bos taurus
RAB23	RAB23, member RAS oncogene family(RAB23)	Bos taurus
TIE1	tyrosine kinase with immunoglobulin like and EGF like domains 1(TIE1)	Bos taurus
GRAMD1B	GRAM domain containing 1B(GRAMD1B)	Bos taurus
PSTPIP1	proline-serine-threonine phosphatase interacting protein 1(PSTPIP1)	Bos taurus
TNF	tumor necrosis factor(TNF)	Bos taurus
STYK1	serine/threonine/tyrosine kinase 1(STYK1)	Bos taurus
WBSCR27	Williams Beuren syndrome chromosome region 27(WBSCR27)	Bos taurus
LOC789803	uncharacterized LOC789803(LOC789803)	Bos taurus
LOC100138824	uncharacterized LOC100138824(LOC100138824)	Bos taurus
SHB	SH2 domain containing adaptor protein B(SHB)	Bos taurus
TEK	TEK receptor tyrosine kinase(TEK)	Bos taurus
EIF4EBP1	eukaryotic translation initiation factor 4E binding protein 1(EIF4EBP1)	Bos taurus
RUNX1	runt related transcription factor 1(RUNX1)	Bos taurus
CD101	CD101 molecule(CD101)	Bos taurus
RALGAPA1	Ral GTPase activating protein catalytic alpha subunit 1(RALGAPA1)	Bos taurus
GNPTAB	N-acetylglucosamine-1-phosphate transferase alpha and beta subunits(GNPTAB)	Bos taurus
POF1B	premature ovarian failure, 1B(POF1B)	Bos taurus
ZFP36L1	ZFP36 ring finger protein like 1(ZFP36L1)	Bos taurus
INPP5B	inositol polyphosphate-5-phosphatase B(INPP5B)	Bos taurus
KIT	KIT proto-oncogene receptor tyrosine kinase(KIT)	Bos taurus
PSKH1	protein serine kinase H1(PSKH1)	Bos taurus
PAK3	p21 (RAC1) activated kinase 3(PAK3)	Bos taurus
APEG3	antisense transcript gene of PEG3(APEG3)	Bos taurus
LPL	lipoprotein lipase(LPL)	Bos taurus
PTK2B	protein tyrosine kinase 2 beta(PTK2B)	Bos taurus
MGC139164	uncharacterized LOC509649(MGC139164)	Bos taurus
LOX	lysyl oxidase(LOX)	Bos taurus
ZNF583	zinc finger protein 583(ZNF583)	Bos taurus
ADAMTSL1	ADAMTS like 1(ADAMTSL1)	Bos taurus
PPAT	phosphoribosyl pyrophosphate amidotransferase(PPAT)	Bos taurus
DECR2	2,4-dienoyl-CoA reductase 2, peroxisomal(DECR2)	Bos taurus
TRIM3	tripartite motif containing 3(TRIM3)	Bos taurus
UBXN8	UBX domain protein 8(UBXN8)	Bos taurus
DHRS7	dehydrogenase/reductase 7(DHRS7)	Bos taurus
NRP2	neuropilin 2(NRP2)	Bos taurus
LOC618533	peptidylprolyl isomerase-like 1 pseudogene(LOC618533)	Bos taurus
MIF	macrophage migration inhibitory factor (glycosylation-inhibiting factor)(MIF)	Bos taurus
HEXIM2	hexamethylene bisacetamide inducible 2(HEXIM2)	Bos taurus
PAPPA2	pappalysin 2(PAPPA2)	Bos taurus
MYCBP2	MYC binding protein 2, E3 ubiquitin protein ligase(MYCBP2)	Bos taurus
PMP22	peripheral myelin protein 22(PMP22)	Bos taurus
NUPR1	nuclear protein 1, transcriptional regulator(NUPR1)	Bos taurus
USP35	ubiquitin specific peptidase 35(USP35)	Bos taurus
ERI1	exoribonuclease 1(ERI1)	Bos taurus
BTBD6	BTB domain containing 6(BTBD6)	Bos taurus
TBC1D30	TBC1 domain family member 30(TBC1D30)	Bos taurus
LRRK1	leucine rich repeat kinase 1(LRRK1)	Bos taurus
MTR	5-methyltetrahydrofolate-homocysteine methyltransferase(MTR)	Bos taurus
RNF169	ring finger protein 169(RNF169)	Bos taurus
BTG3	BTG anti-proliferation factor 3(BTG3)	Bos taurus
CDKL5	cyclin dependent kinase like 5(CDKL5)	Bos taurus
SEC63	SEC63 homolog, protein translocation regulator(SEC63)	Bos taurus
PLEKHN1	pleckstrin homology domain containing N1(PLEKHN1)	Bos taurus
LNPEP	leucyl and cystinyl aminopeptidase(LNPEP)	Bos taurus
ZSWIM4	zinc finger, SWIM-type containing 4(ZSWIM4)	Bos taurus
GBGT1	globoside alpha-1,3-N-acetylgalactosaminyltransferase 1(GBGT1)	Bos taurus
MAP3K9	mitogen-activated protein kinase kinase kinase 9(MAP3K9)	Bos taurus
CXCL9	C-X-C motif chemokine ligand 9(CXCL9)	Bos taurus
MAVS	mitochondrial antiviral signaling protein(MAVS)	Bos taurus
MICALL1	MICAL like 1(MICALL1)	Bos taurus
OGN	osteoglycin(OGN)	Bos taurus
CREB3L4	cAMP responsive element binding protein 3 like 4(CREB3L4)	Bos taurus
THY1	Thy-1 cell surface antigen(THY1)	Bos taurus
PDP1	pyruvate dehyrogenase phosphatase catalytic subunit 1(PDP1)	Bos taurus
SEMA7A	semaphorin 7A (John Milton Hagen blood group)(SEMA7A)	Bos taurus
GALNT7	UDP-N-acetyl-alpha-D-galactosamine:polypeptide N-acetylgalactosaminyltransferase 7(GALNT7)	Bos taurus
CAST	calpastatin(CAST)	Bos taurus
ZBTB43	zinc finger and BTB domain containing 43(ZBTB43)	Bos taurus
NIT1	nitrilase 1(NIT1)	Bos taurus
CASR	calcium sensing receptor(CASR)	Bos taurus
WSB1	WD repeat and SOCS box containing 1(WSB1)	Bos taurus
TBC1D2	TBC1 domain family member 2(TBC1D2)	Bos taurus
SULT4A1	sulfotransferase family 4A member 1(SULT4A1)	Bos taurus
TMEM45A	transmembrane protein 45A(TMEM45A)	Bos taurus
SERPING1	serpin family G member 1(SERPING1)	Bos taurus
SERPINB5	serpin family B member 5(SERPINB5)	Bos taurus
CPT1B	carnitine palmitoyltransferase 1B(CPT1B)	Bos taurus
EPS8L2	EPS8 like 2(EPS8L2)	Bos taurus
SSLP1	secreted seminal-vesicle Ly-6 protein 1(SSLP1)	Bos taurus
RBBP9	RB binding protein 9, serine hydrolase(RBBP9)	Bos taurus
ARL15	ADP ribosylation factor like GTPase 15(ARL15)	Bos taurus
TOR2A	torsin family 2 member A(TOR2A)	Bos taurus
APOO	apolipoprotein O(APOO)	Bos taurus
CD36	CD36 molecule(CD36)	Bos taurus
RCAN2	regulator of calcineurin 2(RCAN2)	Bos taurus
KHK	ketohexokinase(KHK)	Bos taurus
RFX7	regulatory factor X7(RFX7)	Bos taurus
CD34	CD34 molecule(CD34)	Bos taurus
STX17	syntaxin 17(STX17)	Bos taurus
B3GALT5	beta-1,3-galactosyltransferase 5(B3GALT5)	Bos taurus
CCL8	chemokine (C-C motif) ligand 8(CCL8)	Bos taurus
SLC7A7	solute carrier family 7 member 7(SLC7A7)	Bos taurus
CCL2	chemokine (C-C motif) ligand 2(CCL2)	Bos taurus
CAV1	caveolin 1(CAV1)	Bos taurus
TRPV6	transient receptor potential cation channel subfamily V member 6(TRPV6)	Bos taurus
TMEM33	transmembrane protein 33(TMEM33)	Bos taurus
RAMP2	receptor activity modifying protein 2(RAMP2)	Bos taurus
CFTR	cystic fibrosis transmembrane conductance regulator(CFTR)	Bos taurus
DGKE	diacylglycerol kinase epsilon(DGKE)	Bos taurus
CDH3	cadherin 3(CDH3)	Bos taurus
MORC3	MORC family CW-type zinc finger 3(MORC3)	Bos taurus
CD44	CD44 molecule (Indian blood group)(CD44)	Bos taurus
MTHFD1L	methylenetetrahydrofolate dehydrogenase (NADP+ dependent) 1-like(MTHFD1L)	Bos taurus
METRNL	meteorin like, glial cell differentiation regulator(METRNL)	Bos taurus
CDCA7	cell division cycle associated 7(CDCA7)	Bos taurus
TMC8	transmembrane channel like 8(TMC8)	Bos taurus
ARHGAP17	Rho GTPase activating protein 17(ARHGAP17)	Bos taurus
ERMP1	endoplasmic reticulum metallopeptidase 1(ERMP1)	Bos taurus
RERGL	RERG like(RERGL)	Bos taurus
VGLL3	vestigial like family member 3(VGLL3)	Bos taurus
ACE	angiotensin I converting enzyme(ACE)	Bos taurus
ALAS1	5'-aminolevulinate synthase 1(ALAS1)	Bos taurus
DOPEY1	dopey family member 1(DOPEY1)	Bos taurus
HAO2	hydroxyacid oxidase 2 (long chain)(HAO2)	Bos taurus
MARK4	microtubule affinity regulating kinase 4(MARK4)	Bos taurus
KLHDC3	kelch domain containing 3(KLHDC3)	Bos taurus
CDX2	caudal type homeobox 2(CDX2)	Bos taurus
WWTR1	WW domain containing transcription regulator 1(WWTR1)	Bos taurus
SNX22	sorting nexin 22(SNX22)	Bos taurus
SMURF1	SMAD specific E3 ubiquitin protein ligase 1(SMURF1)	Bos taurus
NUDT18	nudix hydrolase 18(NUDT18)	Bos taurus
PTX3	pentraxin 3(PTX3)	Bos taurus
HILPDA	hypoxia inducible lipid droplet associated(HILPDA)	Bos taurus
LGALS4	galectin 4(LGALS4)	Bos taurus
C3H1orf54	chromosome 3 open reading frame, human C1orf54(C3H1orf54)	Bos taurus
ABCA9	ATP binding cassette subfamily A member 9(ABCA9)	Bos taurus
NFATC3	nuclear factor of activated T-cells 3(NFATC3)	Bos taurus
OTUD7B	OTU deubiquitinase 7B(OTUD7B)	Bos taurus
SERGEF	secretion regulating guanine nucleotide exchange factor(SERGEF)	Bos taurus
UBTD2	ubiquitin domain containing 2(UBTD2)	Bos taurus
MTHFD1	methylenetetrahydrofolate dehydrogenase, cyclohydrolase and formyltetrahydrofolate synthetase 1(MTHFD1)	Bos taurus
SOAT1	sterol O-acyltransferase 1(SOAT1)	Bos taurus
FAR2	fatty acyl-CoA reductase 2(FAR2)	Bos taurus
PTGFRN	prostaglandin F2 receptor inhibitor(PTGFRN)	Bos taurus
AKAP13	A-kinase anchoring protein 13(AKAP13)	Bos taurus
SALL4	spalt like transcription factor 4(SALL4)	Bos taurus
PPP1R3F	protein phosphatase 1 regulatory subunit 3F(PPP1R3F)	Bos taurus
NPDC1	neural proliferation, differentiation and control, 1(NPDC1)	Bos taurus
LOC100298064	hepatitis A virus cellular receptor 1(LOC100298064)	Bos taurus
ALPL	alkaline phosphatase, liver/bone/kidney(ALPL)	Bos taurus
SHANK2	SH3 and multiple ankyrin repeat domains 2(SHANK2)	Bos taurus
SPATA13	spermatogenesis associated 13(SPATA13)	Bos taurus
DTNA	dystrobrevin alpha(DTNA)	Bos taurus
SLC38A10	solute carrier family 38 member 10(SLC38A10)	Bos taurus
LOC100138905	zinc finger protein 347-like(LOC100138905)	Bos taurus
SPDYC	speedy/RINGO cell cycle regulator family member C(SPDYC)	Bos taurus
DKK2	dickkopf WNT signaling pathway inhibitor 2(DKK2)	Bos taurus
LOC785763	2,3-bisphosphoglycerate mutase pseudogene(LOC785763)	Bos taurus
LRP4	LDL receptor related protein 4(LRP4)	Bos taurus
GAS2	growth arrest specific 2(GAS2)	Bos taurus
PLOD2	procollagen-lysine,2-oxoglutarate 5-dioxygenase 2(PLOD2)	Bos taurus
ABCD3	ATP binding cassette subfamily D member 3(ABCD3)	Bos taurus
SYAP1	synapse associated protein 1(SYAP1)	Bos taurus
CCDC14	coiled-coil domain containing 14(CCDC14)	Bos taurus
DPY19L3	dpy-19 like 3 (C. elegans)(DPY19L3)	Bos taurus
EDARADD	EDAR associated death domain(EDARADD)	Bos taurus
PTGR1	prostaglandin reductase 1(PTGR1)	Bos taurus
SLC25A22	solute carrier family 25 member 22(SLC25A22)	Bos taurus
CXCL2	chemokine (C-X-C motif) ligand 2(CXCL2)	Bos taurus
ZBTB8A	zinc finger and BTB domain containing 8A(ZBTB8A)	Bos taurus
ZBTB34	zinc finger and BTB domain containing 34(ZBTB34)	Bos taurus
VAV3	vav guanine nucleotide exchange factor 3(VAV3)	Bos taurus
VDR	vitamin D (1,25- dihydroxyvitamin D3) receptor(VDR)	Bos taurus
IL17RD	interleukin 17 receptor D(IL17RD)	Bos taurus
DNAJC18	DnaJ heat shock protein family (Hsp40) member C18(DNAJC18)	Bos taurus
PPM1L	protein phosphatase, Mg2+/Mn2+ dependent 1L(PPM1L)	Bos taurus
RPRD1A	regulation of nuclear pre-mRNA domain containing 1A(RPRD1A)	Bos taurus
RCOR2	REST corepressor 2(RCOR2)	Bos taurus
RHOC	ras homolog family member C(RHOC)	Bos taurus
TSTA3	tissue specific transplantation antigen P35B(TSTA3)	Bos taurus
MLH1	mutL homolog 1(MLH1)	Bos taurus
SATB2	SATB homeobox 2(SATB2)	Bos taurus
CDC42BPG	CDC42 binding protein kinase gamma(CDC42BPG)	Bos taurus
ZNF711	zinc finger protein 711(ZNF711)	Bos taurus
FAAH	fatty acid amide hydrolase(FAAH)	Bos taurus
HSPBAP1	HSPB1 associated protein 1(HSPBAP1)	Bos taurus
FUT2	fucosyltransferase 2 (secretor status included)(FUT2)	Bos taurus
ENPEP	glutamyl aminopeptidase(ENPEP)	Bos taurus
FUT8	fucosyltransferase 8(FUT8)	Bos taurus
GPC1	glypican 1(GPC1)	Bos taurus
CCNA1	cyclin A1(CCNA1)	Bos taurus
CMTM8	CKLF like MARVEL transmembrane domain containing 8(CMTM8)	Bos taurus
TGM1	transglutaminase 1(TGM1)	Bos taurus
LPGAT1	lysophosphatidylglycerol acyltransferase 1(LPGAT1)	Bos taurus
DKK4	dickkopf WNT signaling pathway inhibitor 4(DKK4)	Bos taurus
FDX1	ferredoxin 1(FDX1)	Bos taurus
FECH	ferrochelatase(FECH)	Bos taurus
FGF1	fibroblast growth factor 1(FGF1)	Bos taurus
IL17D	interleukin 17D(IL17D)	Bos taurus
NFATC2	nuclear factor of activated T-cells 2(NFATC2)	Bos taurus
SULT1B1	sulfotransferase family, cytosolic, 1B, member 1(SULT1B1)	Bos taurus
CSGALNACT2	chondroitin sulfate N-acetylgalactosaminyltransferase 2(CSGALNACT2)	Bos taurus
NKX3-1	NK3 homeobox 1(NKX3-1)	Bos taurus
FMO3	flavin containing monooxygenase 3(FMO3)	Bos taurus
XYLT1	xylosyltransferase 1(XYLT1)	Bos taurus
TAF4B	TATA-box binding protein associated factor 4b(TAF4B)	Bos taurus
LCP2	lymphocyte cytosolic protein 2(LCP2)	Bos taurus
DKK1	dickkopf WNT signaling pathway inhibitor 1(DKK1)	Bos taurus
NAPEPLD	N-acyl phosphatidylethanolamine phospholipase D(NAPEPLD)	Bos taurus
CSF1R	colony stimulating factor 1 receptor(CSF1R)	Bos taurus
HMGXB3	HMG-box containing 3(HMGXB3)	Bos taurus
HBE2	globin, beta, epsilon 2(HBE2)	Bos taurus
MBOAT1	membrane bound O-acyltransferase domain containing 1(MBOAT1)	Bos taurus
P2RY12	purinergic receptor P2Y12(P2RY12)	Bos taurus
ESR2	estrogen receptor 2(ESR2)	Bos taurus
THBS4	thrombospondin 4(THBS4)	Bos taurus
SLCO1C1	solute carrier organic anion transporter family member 1C1(SLCO1C1)	Bos taurus
LOC521902	pregnancy-associated glycoprotein 2(LOC521902)	Bos taurus
CGN	cingulin(CGN)	Bos taurus
MERTK	MER proto-oncogene, tyrosine kinase(MERTK)	Bos taurus
LOC100126544	uncharacterized LOC100126544(LOC100126544)	Bos taurus
TNFRSF10D	tumor necrosis factor receptor superfamily, member 10d, decoy with truncated death domain(TNFRSF10D)	Bos taurus
SWAP70	SWAP switching B-cell complex 70kDa subunit(SWAP70)	Bos taurus
CYP2R1	cytochrome P450, family 2, subfamily R, polypeptide 1(CYP2R1)	Bos taurus
RASEF	RAS and EF-hand domain containing(RASEF)	Bos taurus
ASB14	ankyrin repeat and SOCS box containing 14(ASB14)	Bos taurus
SEC24D	SEC24 homolog D, COPII coat complex component(SEC24D)	Bos taurus
S1PR1	sphingosine-1-phosphate receptor 1(S1PR1)	Bos taurus
INSR	insulin receptor(INSR)	Bos taurus
SLC25A19	solute carrier family 25 member 19(SLC25A19)	Bos taurus
STIM2	stromal interaction molecule 2(STIM2)	Bos taurus
SLC17A9	solute carrier family 17 member 9(SLC17A9)	Bos taurus
PPRC1	peroxisome proliferator-activated receptor gamma, coactivator-related 1(PPRC1)	Bos taurus
GNB4	G protein subunit beta 4(GNB4)	Bos taurus
TSPAN17	tetraspanin 17(TSPAN17)	Bos taurus
STX3	syntaxin 3(STX3)	Bos taurus
LAMA3	laminin, alpha 3(LAMA3)	Bos taurus
SPSB1	splA/ryanodine receptor domain and SOCS box containing 1(SPSB1)	Bos taurus
FMO2	flavin containing monooxygenase 2(FMO2)	Bos taurus
CSF1	colony stimulating factor 1(CSF1)	Bos taurus
COMP	cartilage oligomeric matrix protein(COMP)	Bos taurus
ANG	Angularity(ANG)	Bos taurus
FBLN7	fibulin 7(FBLN7)	Bos taurus
MACC1	MACC1, MET transcriptional regulator(MACC1)	Bos taurus
ATP7A	ATPase copper transporting alpha(ATP7A)	Bos taurus
EDEM2	ER degradation enhancing alpha-mannosidase like protein 2(EDEM2)	Bos taurus
ABHD16A	abhydrolase domain containing 16A(ABHD16A)	Bos taurus
CST3	cystatin C(CST3)	Bos taurus
CSH2	chorionic somatomammotropin hormone 2(CSH2)	Bos taurus
RAB7B	RAB7B, member RAS oncogene family(RAB7B)	Bos taurus
ISYNA1	inositol-3-phosphate synthase 1(ISYNA1)	Bos taurus
NDRG1	N-myc downstream regulated 1(NDRG1)	Bos taurus
PEPD	peptidase D(PEPD)	Bos taurus
ANG	Angularity(ANG)	Bos taurus
ANG	Angularity(ANG)	Bos taurus
SLC29A3	solute carrier family 29 (nucleoside transporters), member 3(SLC29A3)	Bos taurus
MYBBP1A	MYB binding protein 1a(MYBBP1A)	Bos taurus
DAB2	DAB2, clathrin adaptor protein(DAB2)	Bos taurus
PDGFD	platelet derived growth factor D(PDGFD)	Bos taurus
ITGAX	integrin, alpha X (complement component 3 receptor 4 subunit)(ITGAX)	Bos taurus
SULT1C4	sulfotransferase family, cytosolic, 1C, member 4(SULT1C4)	Bos taurus
PLAC8	placenta-specific 8(PLAC8)	Bos taurus
SGK3	serum/glucocorticoid regulated kinase family, member 3(SGK3)	Bos taurus
CHST12	carbohydrate (chondroitin 4) sulfotransferase 12(CHST12)	Bos taurus
PPP3CC	protein phosphatase 3 catalytic subunit gamma(PPP3CC)	Bos taurus
RPL30	ribosomal protein L30(RPL30)	Bos taurus
TAGAP	T-cell activation RhoGTPase activating protein(TAGAP)	Bos taurus
EPHA1	EPH receptor A1(EPHA1)	Bos taurus
LOC525947	serotransferrin-like(LOC525947)	Bos taurus
CTSK	cathepsin K(CTSK)	Bos taurus
CPAMD8	C3 and PZP like, alpha-2-macroglobulin domain containing 8(CPAMD8)	Bos taurus
SOCS6	suppressor of cytokine signaling 6(SOCS6)	Bos taurus
SGMS1	sphingomyelin synthase 1(SGMS1)	Bos taurus
ANG	Angularity(ANG)	Bos taurus
MSR1	macrophage scavenger receptor 1(MSR1)	Bos taurus
CC2D1A	coiled-coil and C2 domain containing 1A(CC2D1A)	Bos taurus
ANG	Angularity(ANG)	Bos taurus
KCNG3	potassium voltage-gated channel modifier subfamily G member 3(KCNG3)	Bos taurus
SLAMF7	SLAM family member 7(SLAMF7)	Bos taurus
MCAM	melanoma cell adhesion molecule(MCAM)	Bos taurus
SHOX2	short stature homeobox 2(SHOX2)	Bos taurus
TMEM39A	transmembrane protein 39A(TMEM39A)	Bos taurus
FADS2	fatty acid desaturase 2(FADS2)	Bos taurus
RNF150	ring finger protein 150(RNF150)	Bos taurus
ACER3	alkaline ceramidase 3(ACER3)	Bos taurus
FBXO38	F-box protein 38(FBXO38)	Bos taurus
ULBP27	UL16-binding protein 27(ULBP27)	Bos taurus
CXCL10	C-X-C motif chemokine ligand 10(CXCL10)	Bos taurus
DMGDH	dimethylglycine dehydrogenase(DMGDH)	Bos taurus
ENOSF1	enolase superfamily member 1(ENOSF1)	Bos taurus
DCST1	DC-STAMP domain containing 1(DCST1)	Bos taurus
STS	steroid sulfatase (microsomal), isozyme S(STS)	Bos taurus
LGMN	legumain(LGMN)	Bos taurus
CTIF	cap binding complex dependent translation initiation factor(CTIF)	Bos taurus
CLASRP	CLK4 associating serine/arginine rich protein(CLASRP)	Bos taurus
SIRT2	sirtuin 2(SIRT2)	Bos taurus
LOC513111	transmembrane protein 225-like(LOC513111)	Bos taurus
PGPEP1	pyroglutamyl-peptidase I(PGPEP1)	Bos taurus
SLC38A7	solute carrier family 38 member 7(SLC38A7)	Bos taurus
HIST2H2BF	histone cluster 2, H2bf(HIST2H2BF)	Bos taurus
KHDRBS3	KH RNA binding domain containing, signal transduction associated 3(KHDRBS3)	Bos taurus
RHBDF2	rhomboid 5 homolog 2(RHBDF2)	Bos taurus
KCNK5	potassium two pore domain channel subfamily K member 5(KCNK5)	Bos taurus
PPP2R2B	protein phosphatase 2 regulatory subunit Bbeta(PPP2R2B)	Bos taurus
ZNF575	zinc finger protein 575(ZNF575)	Bos taurus
ENAH	enabled homolog (Drosophila)(ENAH)	Bos taurus
IL1B	interleukin 1 beta(IL1B)	Bos taurus
IL1A	interleukin 1 alpha(IL1A)	Bos taurus
STXBP4	syntaxin binding protein 4(STXBP4)	Bos taurus
IL18	interleukin 18(IL18)	Bos taurus
IL17RB	interleukin 17 receptor B(IL17RB)	Bos taurus
IL10	interleukin 10(IL10)	Bos taurus
GNE	glucosamine (UDP-N-acetyl)-2-epimerase/N-acetylmannosamine kinase(GNE)	Bos taurus
TMEM72	transmembrane protein 72(TMEM72)	Bos taurus
PLEKHG2	pleckstrin homology and RhoGEF domain containing G2(PLEKHG2)	Bos taurus
CPPED1	calcineurin-like phosphoesterase domain containing 1(CPPED1)	Bos taurus
EXOC3	exocyst complex component 3(EXOC3)	Bos taurus
FGF23	fibroblast growth factor 23(FGF23)	Bos taurus
IGF1	insulin like growth factor 1(IGF1)	Bos taurus
CHIC1	cysteine rich hydrophobic domain 1(CHIC1)	Bos taurus
LYPD3	LY6/PLAUR domain containing 3(LYPD3)	Bos taurus
PPM1N	protein phosphatase, Mg2+/Mn2+ dependent 1N (putative)(PPM1N)	Bos taurus
IBSP	integrin binding sialoprotein(IBSP)	Bos taurus
IDH1	isocitrate dehydrogenase (NADP(+)) 1, cytosolic(IDH1)	Bos taurus
HPRT1	hypoxanthine phosphoribosyltransferase 1(HPRT1)	Bos taurus
ANKRD26	ankyrin repeat domain 26(ANKRD26)	Bos taurus
HPSE	heparanase(HPSE)	Bos taurus
SH3D21	SH3 domain containing 21(SH3D21)	Bos taurus
CNNM3	cyclin and CBS domain divalent metal cation transport mediator 3(CNNM3)	Bos taurus
SECTM1A	secreted and transmembrane protein 1A(SECTM1A)	Bos taurus
CTAGE5	CTAGE family member 5, ER export factor(CTAGE5)	Bos taurus
HAS2	hyaluronan synthase 2(HAS2)	Bos taurus
GM2A	GM2 ganglioside activator(GM2A)	Bos taurus
GAS6	growth arrest specific 6(GAS6)	Bos taurus
DQX1	DEAQ-box RNA dependent ATPase 1(DQX1)	Bos taurus
APPL1	adaptor protein, phosphotyrosine interacting with PH domain and leucine zipper 1(APPL1)	Bos taurus
RBP4	retinol binding protein 4(RBP4)	Bos taurus
CORO2B	coronin 2B(CORO2B)	Bos taurus
GSTA4	glutathione S-transferase alpha 4(GSTA4)	Bos taurus
TTLL7	tubulin tyrosine ligase like 7(TTLL7)	Bos taurus
RCN1	reticulocalbin 1(RCN1)	Bos taurus
PIK3AP1	phosphoinositide-3-kinase adaptor protein 1(PIK3AP1)	Bos taurus
BTBD3	BTB domain containing 3(BTBD3)	Bos taurus
SLC25A42	solute carrier family 25 member 42(SLC25A42)	Bos taurus
ANG	Angularity(ANG)	Bos taurus
RELN	reelin(RELN)	Bos taurus
RGS7	regulator of G-protein signaling 7(RGS7)	Bos taurus
RFX4	regulatory factor X4(RFX4)	Bos taurus
C3H1orf210	chromosome 3 open reading frame, human C1orf210(C3H1orf210)	Bos taurus
TMEM125	transmembrane protein 125(TMEM125)	Bos taurus
C20H5orf42	chromosome 20 open reading frame, human C5orf42(C20H5orf42)	Bos taurus
SFXN2	sideroflexin 2(SFXN2)	Bos taurus
ALDOC	aldolase, fructose-bisphosphate C(ALDOC)	Bos taurus
SPAG5	sperm associated antigen 5(SPAG5)	Bos taurus
CYTH4	cytohesin 4(CYTH4)	Bos taurus
BAMBI	BMP and activin membrane bound inhibitor(BAMBI)	Bos taurus
SLC13A3	solute carrier family 13 member 3(SLC13A3)	Bos taurus
ZMAT1	zinc finger matrin-type 1(ZMAT1)	Bos taurus
PON2	paraoxonase 2(PON2)	Bos taurus
GPC3	glypican 3(GPC3)	Bos taurus
KLHL2	kelch like family member 2(KLHL2)	Bos taurus
GYS1	glycogen synthase 1(GYS1)	Bos taurus
INPP5A	inositol polyphosphate-5-phosphatase A(INPP5A)	Bos taurus
FNIP2	folliculin interacting protein 2(FNIP2)	Bos taurus
RNF215	ring finger protein 215(RNF215)	Bos taurus
PRP3	prolactin-related protein 3(PRP3)	Bos taurus
MUM1	melanoma associated antigen (mutated) 1(MUM1)	Bos taurus
SOX14	SRY-box 14(SOX14)	Bos taurus
DENND2D	DENN domain containing 2D(DENND2D)	Bos taurus
LYPLAL1	lysophospholipase like 1(LYPLAL1)	Bos taurus
DAG1	dystroglycan 1(DAG1)	Bos taurus
SIDT2	SID1 transmembrane family member 2(SIDT2)	Bos taurus
CASP7	caspase 7(CASP7)	Bos taurus
QPCT	glutaminyl-peptide cyclotransferase(QPCT)	Bos taurus
SLC17A5	solute carrier family 17 member 5(SLC17A5)	Bos taurus
BLVRA	biliverdin reductase A(BLVRA)	Bos taurus
IER5L	immediate early response 5 like(IER5L)	Bos taurus
MPRIP	myosin phosphatase Rho interacting protein(MPRIP)	Bos taurus
PGAP1	post-GPI attachment to proteins 1(PGAP1)	Bos taurus
KDELC2	KDEL motif containing 2(KDELC2)	Bos taurus
INTS9	integrator complex subunit 9(INTS9)	Bos taurus
ACPP	acid phosphatase, prostate(ACPP)	Bos taurus
LOC100196897	uncharacterized LOC100196897(LOC100196897)	Bos taurus
LOC100196899	uncharacterized LOC100196899(LOC100196899)	Bos taurus
CD302	CD302 molecule(CD302)	Bos taurus
LOC619012	pregnancy-associated glycoprotein 1-like(LOC619012)	Bos taurus
RAC3	ras-related C3 botulinum toxin substrate 3 (rho family, small GTP binding protein Rac3)(RAC3)	Bos taurus
BICC1	BicC family RNA binding protein 1(BICC1)	Bos taurus
NPPC	natriuretic peptide C(NPPC)	Bos taurus
LOC782061	aldo-keto reductase family 1, member C1-like(LOC782061)	Bos taurus
RPS6KA6	ribosomal protein S6 kinase A6(RPS6KA6)	Bos taurus
HNRNPH2	heterogeneous nuclear ribonucleoprotein H2 (H')(HNRNPH2)	Bos taurus
GPR27	G protein-coupled receptor 27(GPR27)	Bos taurus
ITGB1BP1	integrin subunit beta 1 binding protein 1(ITGB1BP1)	Bos taurus
SPAG1	sperm associated antigen 1(SPAG1)	Bos taurus
DHRS4	dehydrogenase/reductase (SDR family) member 4(DHRS4)	Bos taurus
U2AF1L4	U2 small nuclear RNA auxiliary factor 1 like 4(U2AF1L4)	Bos taurus
NRBP2	nuclear receptor binding protein 2(NRBP2)	Bos taurus
GFPT2	glutamine-fructose-6-phosphate transaminase 2(GFPT2)	Bos taurus
SLC33A1	solute carrier family 33 member 1(SLC33A1)	Bos taurus
SERINC5	serine incorporator 5(SERINC5)	Bos taurus
OLR1	oxidized low density lipoprotein receptor 1(OLR1)	Bos taurus
LOC508976	phosphatidylinositol N-acetylglucosaminyltransferase subunit C-like(LOC508976)	Bos taurus
COLEC12	collectin subfamily member 12(COLEC12)	Bos taurus
WNT7A	Wnt family member 7A(WNT7A)	Bos taurus
HUNK	hormonally up-regulated Neu-associated kinase(HUNK)	Bos taurus
UMPS	uridine monophosphate synthetase(UMPS)	Bos taurus
LAMA2	laminin, alpha 2(LAMA2)	Bos taurus
BPGM	bisphosphoglycerate mutase(BPGM)	Bos taurus
UQCR11	ubiquinol-cytochrome c reductase, complex III subunit XI(UQCR11)	Bos taurus
GSTT1	glutathione S-transferase theta 1(GSTT1)	Bos taurus
SLC39A2	solute carrier family 39 member 2(SLC39A2)	Bos taurus
EZR	ezrin(EZR)	Bos taurus
NSUN3	NOP2/Sun RNA methyltransferase family member 3(NSUN3)	Bos taurus
PIK3C2G	phosphatidylinositol-4-phosphate 3-kinase catalytic subunit type 2 gamma(PIK3C2G)	Bos taurus
SENP8	SUMO/sentrin peptidase family member, NEDD8 specific(SENP8)	Bos taurus
ABCA4	ATP binding cassette subfamily A member 4(ABCA4)	Bos taurus
ABCB1	ATP binding cassette subfamily B member 1(ABCB1)	Bos taurus
TACC2	transforming acidic coiled-coil containing protein 2(TACC2)	Bos taurus
LOC100138449	zinc finger protein 501(LOC100138449)	Bos taurus
FAM49A	family with sequence similarity 49 member A(FAM49A)	Bos taurus
ABCC1	ATP binding cassette subfamily C member 1(ABCC1)	Bos taurus
TMEM185B	transmembrane protein 185B(TMEM185B)	Bos taurus
SEMA4F	ssemaphorin 4F(SEMA4F)	Bos taurus
LLGL1	LLGL1, scribble cell polarity complex component(LLGL1)	Bos taurus
CDC20B	cell division cycle 20B(CDC20B)	Bos taurus
STK3	serine/threonine kinase 3(STK3)	Bos taurus
TMPRSS7	transmembrane protease, serine 7(TMPRSS7)	Bos taurus
ANG	angiogenin, ribonuclease, RNase A family, 5(ANG)	Bos taurus
TMEM175	transmembrane protein 175(TMEM175)	Bos taurus
SORD	sorbitol dehydrogenase(SORD)	Bos taurus
NR3C2	nuclear receptor subfamily 3 group C member 2(NR3C2)	Bos taurus
ORMDL3	ORMDL sphingolipid biosynthesis regulator 3(ORMDL3)	Bos taurus
PCYT1B	phosphate cytidylyltransferase 1, choline, beta(PCYT1B)	Bos taurus
PHF1	PHD finger protein 1(PHF1)	Bos taurus
UCP2	uncoupling protein 2(UCP2)	Bos taurus
NAPB	NSF attachment protein beta(NAPB)	Bos taurus
CCDC68	coiled-coil domain containing 68(CCDC68)	Bos taurus
RTTN	rotatin(RTTN)	Bos taurus
TUBB2B	tubulin, beta 2B class IIb(TUBB2B)	Bos taurus
SMC5	structural maintenance of chromosomes 5(SMC5)	Bos taurus
OSBPL7	oxysterol binding protein like 7(OSBPL7)	Bos taurus
LIMD2	LIM domain containing 2(LIMD2)	Bos taurus
CYR61	cysteine rich angiogenic inducer 61(CYR61)	Bos taurus
TEC	tec protein tyrosine kinase(TEC)	Bos taurus
CD163	CD163 molecule(CD163)	Bos taurus
CSRP1	cysteine and glycine rich protein 1(CSRP1)	Bos taurus
SLC9A2	solute carrier family 9 member A2(SLC9A2)	Bos taurus
TCN2	transcobalamin 2(TCN2)	Bos taurus
MAPK7	mitogen-activated protein kinase 7(MAPK7)	Bos taurus
RBMS1	RNA binding motif single stranded interacting protein 1(RBMS1)	Bos taurus
DAO	D-amino acid oxidase(DAO)	Bos taurus
APOBR	apolipoprotein B receptor(APOBR)	Bos taurus
NKIRAS2	NFKB inhibitor interacting Ras like 2(NKIRAS2)	Bos taurus
LOC504812	pregnancy-associated glycoprotein 1(LOC504812)	Bos taurus
STAR	steroidogenic acute regulatory protein(STAR)	Bos taurus
DDX21	DExD-box helicase 21(DDX21)	Bos taurus
SOX5	SRY-box 5(SOX5)	Bos taurus
TLR2	toll like receptor 2(TLR2)	Bos taurus
XPNPEP2	X-prolyl aminopeptidase 2(XPNPEP2)	Bos taurus
TLR3	toll like receptor 3(TLR3)	Bos taurus
THBD	thrombomodulin(THBD)	Bos taurus
EBF1	early B-cell factor 1(EBF1)	Bos taurus
THBS1	thrombospondin 1(THBS1)	Bos taurus
ANG	Angularity(ANG)	Bos taurus
FRMD4B	FERM domain containing 4B(FRMD4B)	Bos taurus
IL20RA	interleukin 20 receptor subunit alpha(IL20RA)	Bos taurus
NARS2	asparaginyl-tRNA synthetase 2, mitochondrial (putative)(NARS2)	Bos taurus
LOC509034	feline leukemia virus subgroup C receptor-related protein 2(LOC509034)	Bos taurus
SELL	selectin L(SELL)	Bos taurus
SLC35E3	solute carrier family 35 member E3(SLC35E3)	Bos taurus
ZFP57	ZFP57 zinc finger protein(ZFP57)	Bos taurus
DGKD	diacylglycerol kinase delta(DGKD)	Bos taurus
SAA3	serum amyloid A 3(SAA3)	Bos taurus
SIX4	SIX homeobox 4(SIX4)	Bos taurus
RP9	retinitis pigmentosa 9 (autosomal dominant)(RP9)	Bos taurus
COG7	component of oligomeric golgi complex 7(COG7)	Bos taurus
PITPNM1	phosphatidylinositol transfer protein membrane associated 1(PITPNM1)	Bos taurus
SPP1	secreted phosphoprotein 1(SPP1)	Bos taurus
SECTM1	secreted and transmembrane 1(SECTM1)	Bos taurus
CLN3	CLN3, battenin(CLN3)	Bos taurus
IMP4	IMP4 homolog, U3 small nucleolar ribonucleoprotein(IMP4)	Bos taurus
HS1BP3	HCLS1 binding protein 3(HS1BP3)	Bos taurus
NUCB2	nucleobindin 2(NUCB2)	Bos taurus
SHMT1	serine hydroxymethyltransferase 1(SHMT1)	Bos taurus
MED25	mediator complex subunit 25(MED25)	Bos taurus
PRPS2	phosphoribosyl pyrophosphate synthetase 2(PRPS2)	Bos taurus
C23H6orf141	chromosome 23 open reading frame, human C6orf141(C23H6orf141)	Bos taurus
LAMA3	laminin subunit alpha 3(LAMA3)	Bos taurus
PKDCC	protein kinase domain containing, cytoplasmic(PKDCC)	Bos taurus
RALGAPA2	Ral GTPase activating protein catalytic alpha subunit 2(RALGAPA2)	Bos taurus
MIR148B	microRNA 148b(MIR148B)	Bos taurus
LGALS9	galectin 9(LGALS9)	Bos taurus
POMT1	protein O-mannosyltransferase 1(POMT1)	Bos taurus
MORC4	MORC family CW-type zinc finger 4(MORC4)	Bos taurus
NFE2L3	nuclear factor, erythroid 2 like 3(NFE2L3)	Bos taurus
TMEM214	transmembrane protein 214(TMEM214)	Bos taurus
SPI1	Spi-1 proto-oncogene(SPI1)	Bos taurus
GCC2	GRIP and coiled-coil domain containing 2(GCC2)	Bos taurus
SLC44A2	solute carrier family 44 member 2(SLC44A2)	Bos taurus
MIR30E	microRNA 30e(MIR30E)	Bos taurus
GDPD2	glycerophosphodiester phosphodiesterase domain containing 2(GDPD2)	Bos taurus
PCBD1	pterin-4 alpha-carbinolamine dehydratase 1(PCBD1)	Bos taurus
DIP2C	disco interacting protein 2 homolog C(DIP2C)	Bos taurus
TEX9	testis expressed 9(TEX9)	Bos taurus
CORO2A	coronin 2A(CORO2A)	Bos taurus
SYNJ2	synaptojanin 2(SYNJ2)	Bos taurus
FEZ2	fasciculation and elongation protein zeta 2(FEZ2)	Bos taurus
TFCP2L1	transcription factor CP2 like 1(TFCP2L1)	Bos taurus
MIR545	microRNA 545(MIR545)	Bos taurus
CMIP	c-Maf inducing protein(CMIP)	Bos taurus
CLDN23	claudin 23(CLDN23)	Bos taurus
BIN3	bridging integrator 3(BIN3)	Bos taurus
SERF1A	small EDRK-rich factor 1A (telomeric)(SERF1A)	Bos taurus
ATP12A	ATPase H+/K+ transporting non-gastric alpha2 subunit(ATP12A)	Bos taurus
ATP11B	ATPase, class VI, type 11B(ATP11B)	Bos taurus
SIPA1L2	signal induced proliferation associated 1 like 2(SIPA1L2)	Bos taurus
GJA5	gap junction protein alpha 5(GJA5)	Bos taurus
MIR27B	microRNA 27b(MIR27B)	Bos taurus
STARD10	StAR related lipid transfer domain containing 10(STARD10)	Bos taurus
PGS1	phosphatidylglycerophosphate synthase 1(PGS1)	Bos taurus
MYO6	myosin VI(MYO6)	Bos taurus
UNC13B	unc-13 homolog B(UNC13B)	Bos taurus
MIR107	microRNA 107(MIR107)	Bos taurus
MYLK3	myosin light chain kinase 3(MYLK3)	Bos taurus
TANK	TRAF family member associated NFKB activator(TANK)	Bos taurus
LOC614376	histone H2B(LOC614376)	Bos taurus
TPCN1	two pore segment channel 1(TPCN1)	Bos taurus
ANKRD33B	ankyrin repeat domain 33B(ANKRD33B)	Bos taurus
SSH3	slingshot protein phosphatase 3(SSH3)	Bos taurus
NLRC5	NLR family CARD domain containing 5(NLRC5)	Bos taurus
LIFR	leukemia inhibitory factor receptor alpha(LIFR)	Bos taurus
NAPA	NSF attachment protein alpha(NAPA)	Bos taurus
LOC100294723	killer cell lectin-like receptor subfamily F member 2(LOC100294723)	Bos taurus
SFRP2	secreted frizzled related protein 2(SFRP2)	Bos taurus
NXPE2	neurexophilin and PC-esterase domain family member 2(NXPE2)	Bos taurus
CD36	CD36 molecule (thrombospondin receptor)(CD36)	Bos taurus
PALLD	palladin, cytoskeletal associated protein(PALLD)	Bos taurus
PCCA	propionyl-CoA carboxylase alpha subunit(PCCA)	Bos taurus
TMEM181	transmembrane protein 181(TMEM181)	Bos taurus
SERPINA3	serpin peptidase inhibitor, clade A (alpha-1 antiproteinase, antitrypsin), member 3(SERPINA3)	Bos taurus
TACC1	transforming acidic coiled-coil containing protein 1(TACC1)	Bos taurus
GRPEL2	GrpE like 2, mitochondrial(GRPEL2)	Bos taurus
C1GALT1	core 1 synthase, glycoprotein-N-acetylgalactosamine 3-beta-galactosyltransferase 1(C1GALT1)	Bos taurus
TBX20	T-box 20(TBX20)	Bos taurus
UVRAG	UV radiation resistance associated(UVRAG)	Bos taurus
GSN	gelsolin(GSN)	Bos taurus
COLQ	collagen like tail subunit of asymmetric acetylcholinesterase(COLQ)	Bos taurus
STX7	syntaxin 7(STX7)	Bos taurus
GPS2	G protein pathway suppressor 2(GPS2)	Bos taurus
ITPRIPL1	inositol 1,4,5-trisphosphate receptor interacting protein-like 1(ITPRIPL1)	Bos taurus
FBXO30	F-box protein 30(FBXO30)	Bos taurus
LOC782385	sentrin-specific protease 8(LOC782385)	Bos taurus
SLC30A9	solute carrier family 30 member 9(SLC30A9)	Bos taurus
PRDM15	PR/SET domain 15(PRDM15)	Bos taurus
ABHD1	abhydrolase domain containing 1(ABHD1)	Bos taurus
MFHAS1	malignant fibrous histiocytoma amplified sequence 1(MFHAS1)	Bos taurus
E2F5	E2F transcription factor 5(E2F5)	Bos taurus
CHCHD5	coiled-coil-helix-coiled-coil-helix domain containing 5(CHCHD5)	Bos taurus
PRKCE	protein kinase C epsilon(PRKCE)	Bos taurus
PLCH2	phospholipase C eta 2(PLCH2)	Bos taurus
GREB1L	growth regulation by estrogen in breast cancer 1 like(GREB1L)	Bos taurus
HHAT	hedgehog acyltransferase(HHAT)	Bos taurus
SLC4A3	solute carrier family 4 member 3(SLC4A3)	Bos taurus
GPCPD1	glycerophosphocholine phosphodiesterase 1(GPCPD1)	Bos taurus
CAMKMT	calmodulin-lysine N-methyltransferase(CAMKMT)	Bos taurus
FAM71F1	family with sequence similarity 71 member F1(FAM71F1)	Bos taurus
HAUS4	HAUS augmin like complex subunit 4(HAUS4)	Bos taurus
ITGA6	integrin subunit alpha 6(ITGA6)	Bos taurus
SFT2D2	SFT2 domain containing 2(SFT2D2)	Bos taurus
TSPAN15	tetraspanin 15(TSPAN15)	Bos taurus
STK38L	serine/threonine kinase 38 like(STK38L)	Bos taurus
SLC29A1	solute carrier family 29 member 1 (Augustine blood group)(SLC29A1)	Bos taurus
GALK1	galactokinase 1(GALK1)	Bos taurus
METTL7B	methyltransferase like 7B(METTL7B)	Bos taurus
PARK2	parkin RBR E3 ubiquitin protein ligase(PARK2)	Bos taurus
TGFBI	transforming growth factor beta induced(TGFBI)	Bos taurus
FCHSD2	FCH and double SH3 domains 2(FCHSD2)	Bos taurus
DNMT3B	DNA methyltransferase 3 beta(DNMT3B)	Bos taurus
CFP	complement factor properdin(CFP)	Bos taurus
LOC100336756	solute carrier family 29 (nucleoside transporters), member 3-like(LOC100336756)	Bos taurus
LDB1	LIM domain binding 1(LDB1)	Bos taurus
MXRA8	matrix remodeling associated 8(MXRA8)	Bos taurus
EMP3	epithelial membrane protein 3(EMP3)	Bos taurus
OTUD3	OTU deubiquitinase 3(OTUD3)	Bos taurus
RASGEF1B	RasGEF domain family member 1B(RASGEF1B)	Bos taurus
KRT19	keratin 19(KRT19)	Bos taurus
PLEKHA2	pleckstrin homology domain containing A2(PLEKHA2)	Bos taurus
ZNF770	zinc finger protein 770(ZNF770)	Bos taurus
VSIG4	V-set and immunoglobulin domain containing 4(VSIG4)	Bos taurus
LOC510961	uncharacterized LOC510961(LOC510961)	Bos taurus
TLR5	toll like receptor 5(TLR5)	Bos taurus
LGALS8	galectin 8(LGALS8)	Bos taurus
LOC100294865	uncharacterized LOC100294865(LOC100294865)	Bos taurus
CMAS	cytidine monophosphate N-acetylneuraminic acid synthetase(CMAS)	Bos taurus
MCCD1	mitochondrial coiled-coil domain 1(MCCD1)	Bos taurus
PEG3	paternally expressed 3(PEG3)	Bos taurus
TNIK	TRAF2 and NCK interacting kinase(TNIK)	Bos taurus
SCML4	sex comb on midleg-like 4 (Drosophila)(SCML4)	Bos taurus
PPDPF	pancreatic progenitor cell differentiation and proliferation factor(PPDPF)	Bos taurus
SNTB2	syntrophin beta 2(SNTB2)	Bos taurus
HSPG2	heparan sulfate proteoglycan 2(HSPG2)	Bos taurus
TXNDC12	thioredoxin domain containing 12(TXNDC12)	Bos taurus
DEXI	Dexi homolog(DEXI)	Bos taurus
F2RL1	F2R like trypsin receptor 1(F2RL1)	Bos taurus
CDKN1C	cyclin dependent kinase inhibitor 1C(CDKN1C)	Bos taurus
ITGB4	integrin subunit beta 4(ITGB4)	Bos taurus
ZNF674	zinc finger protein 674(ZNF674)	Bos taurus
CELSR1	cadherin EGF LAG seven-pass G-type receptor 1(CELSR1)	Bos taurus
SLC39A4	solute carrier family 39 member 4(SLC39A4)	Bos taurus
TMEM65	transmembrane protein 65(TMEM65)	Bos taurus
LRCH3	leucine rich repeats and calponin homology domain containing 3(LRCH3)	Bos taurus
IRF6	interferon regulatory factor 6(IRF6)	Bos taurus
C11H2orf50	chromosome 11 open reading frame, human C2orf50(C11H2orf50)	Bos taurus
C26H10orf76	chromosome 26 C10orf76 homolog(C26H10orf76)	Bos taurus
QPRT	quinolinate phosphoribosyltransferase(QPRT)	Bos taurus
GAPVD1	GTPase activating protein and VPS9 domains 1(GAPVD1)	Bos taurus
MEOX2	mesenchyme homeobox 2(MEOX2)	Bos taurus
RRS1	ribosome biogenesis regulator homolog(RRS1)	Bos taurus
MARS2	methionyl-tRNA synthetase 2, mitochondrial(MARS2)	Bos taurus
APH1B	aph-1 homolog B, gamma-secretase subunit(APH1B)	Bos taurus
NCS1	neuronal calcium sensor 1(NCS1)	Bos taurus
DNPEP	aspartyl aminopeptidase(DNPEP)	Bos taurus
C23H6orf47	chromosome 23 open reading frame, human C6orf47(C23H6orf47)	Bos taurus
NXPH4	neurexophilin 4(NXPH4)	Bos taurus
ITSN1	intersectin 1(ITSN1)	Bos taurus
MAF	MAF bZIP transcription factor(MAF)	Bos taurus
LIMK1	LIM domain kinase 1(LIMK1)	Bos taurus
LOC782483	coiled-coil domain-containing protein 72 pseudogene(LOC782483)	Bos taurus
TTLL1	tubulin tyrosine ligase like 1(TTLL1)	Bos taurus
FBXO17	F-box protein 17(FBXO17)	Bos taurus
GALNT6	polypeptide N-acetylgalactosaminyltransferase 6(GALNT6)	Bos taurus
MB21D1	Mab-21 domain containing 1(MB21D1)	Bos taurus
RHOBTB3	Rho related BTB domain containing 3(RHOBTB3)	Bos taurus
CNTFR	ciliary neurotrophic factor receptor(CNTFR)	Bos taurus
EPB41L5	erythrocyte membrane protein band 4.1 like 5(EPB41L5)	Bos taurus
CLIP2	CAP-Gly domain containing linker protein 2(CLIP2)	Bos taurus
EFHD1	EF-hand domain family member D1(EFHD1)	Bos taurus
SLC37A3	solute carrier family 37 member 3(SLC37A3)	Bos taurus
GYPC	glycophorin C (Gerbich blood group)(GYPC)	Bos taurus
ST3GAL6	ST3 beta-galactoside alpha-2,3-sialyltransferase 6(ST3GAL6)	Bos taurus
HES1	hes family bHLH transcription factor 1(HES1)	Bos taurus
GUF1	GUF1 homolog, GTPase(GUF1)	Bos taurus
PRSS58	protease, serine, 58(PRSS58)	Bos taurus
FBLN5	fibulin 5(FBLN5)	Bos taurus
CD55	CD55 molecule (Cromer blood group)(CD55)	Bos taurus
LPAR6	lysophosphatidic acid receptor 6(LPAR6)	Bos taurus
CD84	CD84 molecule(CD84)	Bos taurus
PIGA	phosphatidylinositol glycan anchor biosynthesis class A(PIGA)	Bos taurus
F2R	coagulation factor II thrombin receptor(F2R)	Bos taurus
RFK	riboflavin kinase(RFK)	Bos taurus
SLC15A2	solute carrier family 15 member 2(SLC15A2)	Bos taurus
ESM1	endothelial cell specific molecule 1(ESM1)	Bos taurus
MPP6	membrane palmitoylated protein 6(MPP6)	Bos taurus
NUDT4	nudix hydrolase 4(NUDT4)	Bos taurus
LIG3	DNA ligase 3(LIG3)	Bos taurus
CREG1	cellular repressor of E1A stimulated genes 1(CREG1)	Bos taurus
IGFLR1	IGF like family receptor 1(IGFLR1)	Bos taurus
SLC35G1	solute carrier family 35 member G1(SLC35G1)	Bos taurus
THOP1	thimet oligopeptidase 1(THOP1)	Bos taurus
ARFIP2	ADP ribosylation factor interacting protein 2(ARFIP2)	Bos taurus
PAK6	p21 (RAC1) activated kinase 6(PAK6)	Bos taurus
IL6R	interleukin 6 receptor(IL6R)	Bos taurus
IVNS1ABP	influenza virus NS1A binding protein(IVNS1ABP)	Bos taurus
TP53INP1	tumor protein p53 inducible nuclear protein 1(TP53INP1)	Bos taurus
PAPLN	papilin, proteoglycan like sulfated glycoprotein(PAPLN)	Bos taurus
MGST3	microsomal glutathione S-transferase 3(MGST3)	Bos taurus
SIRT5	sirtuin 5(SIRT5)	Bos taurus
LEF1	lymphoid enhancer binding factor 1(LEF1)	Bos taurus
FSD1L	fibronectin type III and SPRY domain containing 1 like(FSD1L)	Bos taurus
PCDH17	protocadherin 17(PCDH17)	Bos taurus
TNRC18	trinucleotide repeat containing 18(TNRC18)	Bos taurus
ZNF280A	zinc finger protein 280A(ZNF280A)	Bos taurus
SLC9A7	solute carrier family 9 member A7(SLC9A7)	Bos taurus
ELK1	ELK1, ETS transcription factor(ELK1)	Bos taurus
LTBP1	latent transforming growth factor beta binding protein 1(LTBP1)	Bos taurus
FSCN1	fascin actin-bundling protein 1(FSCN1)	Bos taurus
CPED1	cadherin like and PC-esterase domain containing 1(CPED1)	Bos taurus
LOC100295034	uncharacterized LOC100295034(LOC100295034)	Bos taurus
PCDHGB3	protocadherin gamma subfamily B, 3(PCDHGB3)	Bos taurus
MGC157405	pregnancy-associated glycoprotein(MGC157405)	Bos taurus
SPATS2	spermatogenesis associated serine rich 2(SPATS2)	Bos taurus
LOC100337122	caudal type homeobox 1-like(LOC100337122)	Bos taurus
RNF183	ring finger protein 183(RNF183)	Bos taurus
DCTPP1	dCTP pyrophosphatase 1(DCTPP1)	Bos taurus
AGTR2	angiotensin II receptor type 2(AGTR2)	Bos taurus
SLC31A2	solute carrier family 31 member 2(SLC31A2)	Bos taurus
GJB2	gap junction protein beta 2(GJB2)	Bos taurus
ELOVL7	ELOVL fatty acid elongase 7(ELOVL7)	Bos taurus
PTPRC	protein tyrosine phosphatase, receptor type C(PTPRC)	Bos taurus
ANG	Angularity(ANG)	Bos taurus
LOC782688	protein SET-like(LOC782688)	Bos taurus
ANG	Angularity(ANG)	Bos taurus
ZNF585A	zinc finger protein 585A(ZNF585A)	Bos taurus
FAM219A	family with sequence similarity 219 member A(FAM219A)	Bos taurus
DBNDD1	dysbindin domain containing 1(DBNDD1)	Bos taurus
FITM2	fat storage inducing transmembrane protein 2(FITM2)	Bos taurus
GNB5	G protein subunit beta 5(GNB5)	Bos taurus
ARHGEF37	Rho guanine nucleotide exchange factor 37(ARHGEF37)	Bos taurus
SNX24	sorting nexin 24(SNX24)	Bos taurus
LOC617905	uncharacterized LOC617905(LOC617905)	Bos taurus
VASP	vasodilator-stimulated phosphoprotein(VASP)	Bos taurus
PLXNC1	plexin C1(PLXNC1)	Bos taurus
CTSA	cathepsin A(CTSA)	Bos taurus
PEA15	phosphoprotein enriched in astrocytes 15(PEA15)	Bos taurus
BMPR1B	bone morphogenetic protein receptor type 1B(BMPR1B)	Bos taurus
PPFIBP1	PPFIA binding protein 1(PPFIBP1)	Bos taurus
APH1A	aph-1 homolog A, gamma-secretase subunit(APH1A)	Bos taurus
CD80	CD80 molecule(CD80)	Bos taurus
GFOD2	glucose-fructose oxidoreductase domain containing 2(GFOD2)	Bos taurus
WDR59	WD repeat domain 59(WDR59)	Bos taurus
PARD3B	par-3 family cell polarity regulator beta(PARD3B)	Bos taurus
ABCA1	ATP binding cassette subfamily A member 1(ABCA1)	Bos taurus
ZFP90	ZFP90 zinc finger protein(ZFP90)	Bos taurus
STK4	serine/threonine kinase 4(STK4)	Bos taurus
SEC61A2	Sec61 translocon alpha 2 subunit(SEC61A2)	Bos taurus
RASGEF1A	RasGEF domain family member 1A(RASGEF1A)	Bos taurus
NIPA1	non imprinted in Prader-Willi/Angelman syndrome 1(NIPA1)	Bos taurus
SCCPDH	saccharopine dehydrogenase (putative)(SCCPDH)	Bos taurus
ARHGAP28	Rho GTPase activating protein 28(ARHGAP28)	Bos taurus
WDR3	WD repeat domain 3(WDR3)	Bos taurus
ELL2	elongation factor for RNA polymerase II 2(ELL2)	Bos taurus
SLC16A14	solute carrier family 16 member 14(SLC16A14)	Bos taurus
CCL28	C-C motif chemokine ligand 28(CCL28)	Bos taurus
MCMBP	minichromosome maintenance complex binding protein(MCMBP)	Bos taurus
LMBRD1	LMBR1 domain containing 1(LMBRD1)	Bos taurus
ROGDI	rogdi homolog(ROGDI)	Bos taurus
DHRS12	dehydrogenase/reductase 12(DHRS12)	Bos taurus
PLEKHG6	pleckstrin homology and RhoGEF domain containing G6(PLEKHG6)	Bos taurus
TJP2	tight junction protein 2(TJP2)	Bos taurus
LOC100298767	chorionic somatomammotropin hormone 2(LOC100298767)	Bos taurus
FYB	FYN binding protein(FYB)	Bos taurus
LDB2	LIM domain binding 2(LDB2)	Bos taurus
HOMER1	homer scaffolding protein 1(HOMER1)	Bos taurus
TSNARE1	t-SNARE domain containing 1(TSNARE1)	Bos taurus
FLVCR2	feline leukemia virus subgroup C cellular receptor family, member 2(FLVCR2)	Bos taurus
ADCK5	aarF domain containing kinase 5(ADCK5)	Bos taurus
USP31	ubiquitin specific peptidase 31(USP31)	Bos taurus
MON2	MON2 homolog, regulator of endosome-to-Golgi trafficking(MON2)	Bos taurus
SLC15A4	solute carrier family 15 member 4(SLC15A4)	Bos taurus
POLR3C	RNA polymerase III subunit C(POLR3C)	Bos taurus
GPR156	G protein-coupled receptor 156(GPR156)	Bos taurus
MAPK13	mitogen-activated protein kinase 13(MAPK13)	Bos taurus
FES	FES proto-oncogene, tyrosine kinase(FES)	Bos taurus
SMARCAD1	SWI/SNF-related, matrix-associated actin-dependent regulator of chromatin, subfamily a, containing DEAD/H box 1(SMARCAD1)	Bos taurus
USP9X	ubiquitin specific peptidase 9, X-linked(USP9X)	Bos taurus
VNN1	vanin 1(VNN1)	Bos taurus
PIAS3	protein inhibitor of activated STAT 3(PIAS3)	Bos taurus
ATF6	activating transcription factor 6(ATF6)	Bos taurus
ASB12	ankyrin repeat and SOCS box containing 12(ASB12)	Bos taurus
LNP1	leukemia NUP98 fusion partner 1(LNP1)	Bos taurus
LOC100337015	Rho guanine nucleotide exchange factor (GEF) 12-like(LOC100337015)	Bos taurus
SPOP	speckle type BTB/POZ protein(SPOP)	Bos taurus
LMO7	LIM domain 7(LMO7)	Bos taurus
LRP2	LDL receptor related protein 2(LRP2)	Bos taurus
ZFAND2A	zinc finger AN1-type containing 2A(ZFAND2A)	Bos taurus
EXOC3L2	exocyst complex component 3 like 2(EXOC3L2)	Bos taurus
ALAD	aminolevulinate dehydratase(ALAD)	Bos taurus
ARV1	ARV1 homolog, fatty acid homeostasis modulator(ARV1)	Bos taurus
PRP8	prolactin-related protein VIII(PRP8)	Bos taurus
SDCBP2	syndecan binding protein 2(SDCBP2)	Bos taurus
WNT10B	Wnt family member 10B(WNT10B)	Bos taurus
SPAG17	sperm associated antigen 17(SPAG17)	Bos taurus
TNFSF10	tumor necrosis factor superfamily member 10(TNFSF10)	Bos taurus
GCNT4	glucosaminyl (N-acetyl) transferase 4, core 2(GCNT4)	Bos taurus
SACM1L	SAC1 suppressor of actin mutations 1-like (yeast)(SACM1L)	Bos taurus
TLR6	toll like receptor 6(TLR6)	Bos taurus
ANLN	anillin actin binding protein(ANLN)	Bos taurus
ATP2C1	ATPase secretory pathway Ca2+ transporting 1(ATP2C1)	Bos taurus
CCDC88C	coiled-coil domain containing 88C(CCDC88C)	Bos taurus
SREBF1	sterol regulatory element binding transcription factor 1(SREBF1)	Bos taurus
IKZF2	IKAROS family zinc finger 2(IKZF2)	Bos taurus
TEAD4	TEA domain transcription factor 4(TEAD4)	Bos taurus
TRAF5	TNF receptor associated factor 5(TRAF5)	Bos taurus
ZNF432	zinc finger protein 432(ZNF432)	Bos taurus
AMOT	angiomotin(AMOT)	Bos taurus
LOC100336964	uncharacterized LOC100336964(LOC100336964)	Bos taurus
ADCY2	adenylate cyclase 2(ADCY2)	Bos taurus
SH3D19	SH3 domain containing 19(SH3D19)	Bos taurus
CACNB2	calcium voltage-gated channel auxiliary subunit beta 2(CACNB2)	Bos taurus
ZNF512B	zinc finger protein 512B(ZNF512B)	Bos taurus
SIRPA	signal regulatory protein alpha(SIRPA)	Bos taurus
MTUS1	microtubule associated tumor suppressor 1(MTUS1)	Bos taurus
IDH2	isocitrate dehydrogenase (NADP(+)) 2, mitochondrial(IDH2)	Bos taurus
BBOX1	gamma-butyrobetaine hydroxylase 1(BBOX1)	Bos taurus
TSPAN33	tetraspanin 33(TSPAN33)	Bos taurus
GALNT3	polypeptide N-acetylgalactosaminyltransferase 3(GALNT3)	Bos taurus
FECH	ferrochelatase(FECH)	Bos taurus
LOC100336946	G-protein coupled receptor 39-like(LOC100336946)	Bos taurus
SLC22A14	solute carrier family 22 member 14(SLC22A14)	Bos taurus
ARFGEF2	ADP ribosylation factor guanine nucleotide exchange factor 2(ARFGEF2)	Bos taurus
PARD6G	par-6 family cell polarity regulator gamma(PARD6G)	Bos taurus
SGCE	sarcoglycan epsilon(SGCE)	Bos taurus
HAAO	3-hydroxyanthranilate 3,4-dioxygenase(HAAO)	Bos taurus
IFI27L2	interferon, alpha-inducible protein 27-like 2(IFI27L2)	Bos taurus
MITF	melanogenesis associated transcription factor(MITF)	Bos taurus
AIM1L	absent in melanoma 1-like(AIM1L)	Bos taurus
SLC7A6	solute carrier family 7 member 6(SLC7A6)	Bos taurus
BHLHE41	basic helix-loop-helix family member e41(BHLHE41)	Bos taurus
ANKRD44	ankyrin repeat domain 44(ANKRD44)	Bos taurus
INPP4A	inositol polyphosphate-4-phosphatase type I A(INPP4A)	Bos taurus
SCNN1G	sodium channel epithelial 1 gamma subunit(SCNN1G)	Bos taurus
MOGAT1	monoacylglycerol O-acyltransferase 1(MOGAT1)	Bos taurus
ASAH1	N-acylsphingosine amidohydrolase 1(ASAH1)	Bos taurus
TSPAN31	tetraspanin 31(TSPAN31)	Bos taurus
LOC100336917	dehydrogenase/reductase (SDR family) member 3-like(LOC100336917)	Bos taurus
GLB1	galactosidase beta 1(GLB1)	Bos taurus
NPDC1	neural proliferation, differentiation and control 1(NPDC1)	Bos taurus
KDR	kinase insert domain receptor(KDR)	Bos taurus
AMHR2	anti-Mullerian hormone receptor type 2(AMHR2)	Bos taurus
PADI2	peptidyl arginine deiminase 2(PADI2)	Bos taurus
GNG10	G protein subunit gamma 10(GNG10)	Bos taurus
SMARCA1	SWI/SNF related, matrix associated, actin dependent regulator of chromatin, subfamily a, member 1(SMARCA1)	Bos taurus
LRP8	LDL receptor related protein 8(LRP8)	Bos taurus
GTF3C2	general transcription factor IIIC subunit 2(GTF3C2)	Bos taurus
PLD3	phospholipase D family member 3(PLD3)	Bos taurus
CYP2S1	cytochrome P450, family 2, subfamily S, polypeptide 1(CYP2S1)	Bos taurus
LOC782781	uncharacterized LOC782781(LOC782781)	Bos taurus
ZMYM3	zinc finger MYM-type containing 3(ZMYM3)	Bos taurus
TRRAP	transformation/transcription domain associated protein(TRRAP)	Bos taurus
ZNF287	zinc finger protein 287(ZNF287)	Bos taurus
HTRA4	HtrA serine peptidase 4(HTRA4)	Bos taurus
P2RY13	purinergic receptor P2Y13(P2RY13)	Bos taurus
TMEM42	transmembrane protein 42(TMEM42)	Bos taurus
SNX29	sorting nexin 29(SNX29)	Bos taurus
SLC25A40	solute carrier family 25, member 40(SLC25A40)	Bos taurus
LOC100337357	dipeptidyl peptidase 4-like(LOC100337357)	Bos taurus
INPP5K	inositol polyphosphate-5-phosphatase K(INPP5K)	Bos taurus
MAP4K3	mitogen-activated protein kinase kinase kinase kinase 3(MAP4K3)	Bos taurus
CCDC158	coiled-coil domain containing 158(CCDC158)	Bos taurus
MED8	mediator complex subunit 8(MED8)	Bos taurus
LOC100139164	uncharacterized LOC100139164(LOC100139164)	Bos taurus
FRY	FRY microtubule binding protein(FRY)	Bos taurus
PALB2	partner and localizer of BRCA2(PALB2)	Bos taurus
CABYR	calcium binding tyrosine phosphorylation regulated(CABYR)	Bos taurus
ZNF518B	zinc finger protein 518B(ZNF518B)	Bos taurus
DSCR3	DSCR3 arrestin fold containing(DSCR3)	Bos taurus
ALOX5AP	arachidonate 5-lipoxygenase activating protein(ALOX5AP)	Bos taurus
OSBP2	oxysterol binding protein 2(OSBP2)	Bos taurus
BRF1	BRF1, RNA polymerase III transcription initiation factor 90 kDa subunit(BRF1)	Bos taurus
IQCB1	IQ motif containing B1(IQCB1)	Bos taurus
DENND1A	DENN domain containing 1A(DENND1A)	Bos taurus
ETV3	ETS variant 3(ETV3)	Bos taurus
BCNT2	bucentaur-2(BCNT2)	Bos taurus
LOC782953	60S ribosomal protein L30 pseudogene(LOC782953)	Bos taurus
TMEM45B	transmembrane protein 45B(TMEM45B)	Bos taurus
YES1	YES proto-oncogene 1, Src family tyrosine kinase(YES1)	Bos taurus
NPL	N-acetylneuraminate pyruvate lyase(NPL)	Bos taurus
DSEL	dermatan sulfate epimerase-like(DSEL)	Bos taurus
ATP6V0A4	ATPase H+ transporting V0 subunit a4(ATP6V0A4)	Bos taurus
SIAH1	siah E3 ubiquitin protein ligase 1(SIAH1)	Bos taurus
ACSL5	acyl-CoA synthetase long-chain family member 5(ACSL5)	Bos taurus
PLXNA1	plexin A1(PLXNA1)	Bos taurus
TBC1D4	TBC1 domain family member 4(TBC1D4)	Bos taurus
HRK	harakiri, BCL2 interacting protein(HRK)	Bos taurus
PDCD1	programmed cell death 1(PDCD1)	Bos taurus
PEG10	paternally expressed 10(PEG10)	Bos taurus
TMEM144	transmembrane protein 144(TMEM144)	Bos taurus
ZNF24	zinc finger protein 24(ZNF24)	Bos taurus
PDXK	pyridoxal (pyridoxine, vitamin B6) kinase(PDXK)	Bos taurus
CSTB	cystatin B (stefin B)(CSTB)	Bos taurus
GPR137B	G protein-coupled receptor 137B(GPR137B)	Bos taurus
MFSD9	major facilitator superfamily domain containing 9(MFSD9)	Bos taurus
RASSF1	Ras association domain family member 1(RASSF1)	Bos taurus
OXR1	oxidation resistance 1(OXR1)	Bos taurus
CDC42EP3	CDC42 effector protein 3(CDC42EP3)	Bos taurus
GMPPB	GDP-mannose pyrophosphorylase B(GMPPB)	Bos taurus
CLIP1	CAP-Gly domain containing linker protein 1(CLIP1)	Bos taurus
METTL23	methyltransferase like 23(METTL23)	Bos taurus
DHRS11	dehydrogenase/reductase 11(DHRS11)	Bos taurus
CTSS	cathepsin S(CTSS)	Bos taurus
LOC100337287	zinc finger protein 76 (expressed in testis)-like(LOC100337287)	Bos taurus
HSPB6	heat shock protein family B (small) member 6(HSPB6)	Bos taurus
CAMKK1	calcium/calmodulin dependent protein kinase kinase 1(CAMKK1)	Bos taurus
LIPK	lipase family member K(LIPK)	Bos taurus
RIC8B	RIC8 guanine nucleotide exchange factor B(RIC8B)	Bos taurus
ZMYM6	zinc finger MYM-type containing 6(ZMYM6)	Bos taurus
ACAD11	acyl-CoA dehydrogenase family member 11(ACAD11)	Bos taurus
NDUFB1	NADH:ubiquinone oxidoreductase subunit B1(NDUFB1)	Bos taurus
CST6	cystatin E/M(CST6)	Bos taurus
BAK1	BCL2 antagonist/killer 1(BAK1)	Bos taurus
CPPED1	calcineurin-like phosphoesterase domain containing 1(CPPED1)	Bos taurus
GOLGA4	golgin A4(GOLGA4)	Bos taurus
PLCE1	phospholipase C epsilon 1(PLCE1)	Bos taurus
SLC35B4	solute carrier family 35 member B4(SLC35B4)	Bos taurus
TEX10	testis expressed 10(TEX10)	Bos taurus
E2F6	E2F transcription factor 6(E2F6)	Bos taurus
SPIRE1	spire type actin nucleation factor 1(SPIRE1)	Bos taurus
CCBE1	collagen and calcium binding EGF domains 1(CCBE1)	Bos taurus
C25H7orf50	chromosome 25 open reading frame, human C7orf50(C25H7orf50)	Bos taurus
WDR81	WD repeat domain 81(WDR81)	Bos taurus
PITPNB	phosphatidylinositol transfer protein beta(PITPNB)	Bos taurus
SKP2	S-phase kinase associated protein 2(SKP2)	Bos taurus
OFD1	OFD1, centriole and centriolar satellite protein(OFD1)	Bos taurus
TIMD4	T-cell immunoglobulin and mucin domain containing 4(TIMD4)	Bos taurus
ISPD	isoprenoid synthase domain containing(ISPD)	Bos taurus
SLC4A7	solute carrier family 4 member 7(SLC4A7)	Bos taurus
LOC618199	peroxisomal biogenesis factor 11 alpha(LOC618199)	Bos taurus
ALG2	ALG2, alpha-1,3/1,6-mannosyltransferase(ALG2)	Bos taurus
KTI12	KTI12 chromatin associated homolog(KTI12)	Bos taurus
GLA	galactosidase, alpha(GLA)	Bos taurus
ZNF394	zinc finger protein 394(ZNF394)	Bos taurus
SNX11	sorting nexin 11(SNX11)	Bos taurus
LYSMD3	LysM domain containing 3(LYSMD3)	Bos taurus
GNPDA1	glucosamine-6-phosphate deaminase 1(GNPDA1)	Bos taurus
B4GALNT3	beta-1,4-N-acetyl-galactosaminyltransferase 3(B4GALNT3)	Bos taurus
RAB21	RAB21, member RAS oncogene family(RAB21)	Bos taurus
LOC618023	cancer/testis antigen 1(LOC618023)	Bos taurus
LY96	lymphocyte antigen 96(LY96)	Bos taurus
AHNAK	AHNAK nucleoprotein(AHNAK)	Bos taurus
UHRF2	ubiquitin like with PHD and ring finger domains 2(UHRF2)	Bos taurus
SV2B	synaptic vesicle glycoprotein 2B(SV2B)	Bos taurus
SHROOM4	shroom family member 4(SHROOM4)	Bos taurus
FLT1	fms related tyrosine kinase 1(FLT1)	Bos taurus
SLC35D1	solute carrier family 35 member D1(SLC35D1)	Bos taurus
MRI1	methylthioribose-1-phosphate isomerase 1(MRI1)	Bos taurus
SLC40A1	solute carrier family 40 member 1(SLC40A1)	Bos taurus
MED22	mediator complex subunit 22(MED22)	Bos taurus
TMEM106C	transmembrane protein 106C(TMEM106C)	Bos taurus
LOC613739	pregnancy-associated glycoprotein 2(LOC613739)	Bos taurus
LOC522938	family with sequence similarity 48, member A-like(LOC522938)	Bos taurus
GGNBP2	gametogenetin binding protein 2(GGNBP2)	Bos taurus
NXN	nucleoredoxin(NXN)	Bos taurus
PPL	periplakin(PPL)	Bos taurus
SLC52A3	solute carrier family 52 member 3(SLC52A3)	Bos taurus
FZD4	frizzled class receptor 4(FZD4)	Bos taurus
WNT2B	Wnt family member 2B(WNT2B)	Bos taurus
OXR1	oxidation resistance 1(OXR1)	Bos taurus
MMP12	matrix metallopeptidase 12(MMP12)	Bos taurus
PGK1	phosphoglycerate kinase 1(PGK1)	Bos taurus
TKT	transketolase(TKT)	Bos taurus
ABCC6	ATP binding cassette subfamily C member 6(ABCC6)	Bos taurus
CNPPD1	cyclin Pas1/PHO80 domain containing 1(CNPPD1)	Bos taurus
FAM134A	family with sequence similarity 134 member A(FAM134A)	Bos taurus
EMILIN2	elastin microfibril interfacer 2(EMILIN2)	Bos taurus
GOLGA5	golgin A5(GOLGA5)	Bos taurus
LOC100337279	uncharacterized LOC100337279(LOC100337279)	Bos taurus
PLCL2	phospholipase C like 2(PLCL2)	Bos taurus
FMR1	fragile X mental retardation 1(FMR1)	Bos taurus
RIPK3	receptor interacting serine/threonine kinase 3(RIPK3)	Bos taurus
FAM20C	FAM20C, golgi associated secretory pathway kinase(FAM20C)	Bos taurus
ZDHHC13	zinc finger DHHC-type containing 13(ZDHHC13)	Bos taurus
CYP26A1	cytochrome P450, family 26, subfamily A, polypeptide 1(CYP26A1)	Bos taurus
ECH1	enoyl-CoA hydratase 1(ECH1)	Bos taurus
GTDC1	glycosyltransferase like domain containing 1(GTDC1)	Bos taurus
QSOX1	quiescin sulfhydryl oxidase 1(QSOX1)	Bos taurus
KCTD18	potassium channel tetramerization domain containing 18(KCTD18)	Bos taurus
GPR34	G protein-coupled receptor 34(GPR34)	Bos taurus
TSPAN14	tetraspanin 14(TSPAN14)	Bos taurus
ENTPD4	ectonucleoside triphosphate diphosphohydrolase 4(ENTPD4)	Bos taurus
LOC510369	hypoxanthine-guanine phosphoribosyltransferase(LOC510369)	Bos taurus
SULT1C4	sulfotransferase family, cytosolic, 1C, member 4(SULT1C4)	Bos taurus
KANK2	KN motif and ankyrin repeat domains 2(KANK2)	Bos taurus
CASP2	caspase 2, apoptosis-related cysteine peptidase(CASP2)	Bos taurus
LOC100337178	polypyrimidine tract binding protein 2-like(LOC100337178)	Bos taurus
FKBP15	FK506 binding protein 15(FKBP15)	Bos taurus
FAM84A	family with sequence similarity 84 member A(FAM84A)	Bos taurus
SNED1	sushi, nidogen and EGF like domains 1(SNED1)	Bos taurus
FAM167A	family with sequence similarity 167 member A(FAM167A)	Bos taurus
GTF2I	general transcription factor IIi(GTF2I)	Bos taurus
PROM1	prominin 1(PROM1)	Bos taurus
ASNS	asparagine synthetase (glutamine-hydrolyzing)(ASNS)	Bos taurus
RNF6	ring finger protein 6(RNF6)	Bos taurus
MYH14	myosin heavy chain 14(MYH14)	Bos taurus
AGFG2	ArfGAP with FG repeats 2(AGFG2)	Bos taurus
TFEC	transcription factor EC(TFEC)	Bos taurus
RB1	RB transcriptional corepressor 1(RB1)	Bos taurus
TCF19	transcription factor 19(TCF19)	Bos taurus
KLF16	Kruppel like factor 16(KLF16)	Bos taurus
BCL6	B-cell CLL/lymphoma 6(BCL6)	Bos taurus
TMEM184B	transmembrane protein 184B(TMEM184B)	Bos taurus
TRIM36	tripartite motif containing 36(TRIM36)	Bos taurus
MCF2L2	MCF.2 cell line derived transforming sequence-like 2(MCF2L2)	Bos taurus
STXBP6	syntaxin binding protein 6(STXBP6)	Bos taurus
CISD1	CDGSH iron sulfur domain 1(CISD1)	Bos taurus
CACNA1S	calcium voltage-gated channel subunit alpha1 S(CACNA1S)	Bos taurus
MYO1D	myosin ID(MYO1D)	Bos taurus
KLHL7	kelch like family member 7(KLHL7)	Bos taurus
CIDEA	cell death-inducing DFFA-like effector a(CIDEA)	Bos taurus
PLAC8	placenta-specific 8(PLAC8)	Bos taurus
NDRG3	NDRG family member 3(NDRG3)	Bos taurus
SLA2	Src like adaptor 2(SLA2)	Bos taurus
GLIPR1	GLI pathogenesis related 1(GLIPR1)	Bos taurus
ARL4A	ADP ribosylation factor like GTPase 4A(ARL4A)	Bos taurus
ZBTB4	zinc finger and BTB domain containing 4(ZBTB4)	Bos taurus
BCL2L10	BCL2 like 10(BCL2L10)	Bos taurus
DSCAML1	DS cell adhesion molecule like 1(DSCAML1)	Bos taurus
RPGRIP1L	RPGRIP1 like(RPGRIP1L)	Bos taurus
PLEK	pleckstrin(PLEK)	Bos taurus
PAQR3	progestin and adipoQ receptor family member 3(PAQR3)	Bos taurus
LOC783221	coiled-coil-helix-coiled-coil-helix domain containing 5 pseudogene(LOC783221)	Bos taurus
ZFYVE27	zinc finger FYVE-type containing 27(ZFYVE27)	Bos taurus
NAT9	N-acetyltransferase 9 (putative)(NAT9)	Bos taurus
NRN1	neuritin 1(NRN1)	Bos taurus
KANK1	KN motif and ankyrin repeat domains 1(KANK1)	Bos taurus
GPT2	glutamic--pyruvic transaminase 2(GPT2)	Bos taurus
ATP6V1G2	ATPase H+ transporting V1 subunit G2(ATP6V1G2)	Bos taurus
UBR2	ubiquitin protein ligase E3 component n-recognin 2(UBR2)	Bos taurus
NFKBIL1	NFKB inhibitor like 1(NFKBIL1)	Bos taurus
GADD45B	growth arrest and DNA damage inducible beta(GADD45B)	Bos taurus
PALM3	paralemmin 3(PALM3)	Bos taurus
FNBP1	formin binding protein 1(FNBP1)	Bos taurus
TMEM63B	transmembrane protein 63B(TMEM63B)	Bos taurus
KAT2A	lysine acetyltransferase 2A(KAT2A)	Bos taurus
FAM49B	family with sequence similarity 49 member B(FAM49B)	Bos taurus
LOC523023	testis-specific serine/threonine-protein kinase 5-like(LOC523023)	Bos taurus
FBXO40	F-box protein 40(FBXO40)	Bos taurus
LOC538699	TAF5-like RNA polymerase II p300/CBP-associated factor-associated factor 65 kDa subunit 5L pseudogene(LOC538699)	Bos taurus
LOXL3	lysyl oxidase like 3(LOXL3)	Bos taurus
STARD13	StAR related lipid transfer domain containing 13(STARD13)	Bos taurus
SRP9	signal recognition particle 9(SRP9)	Bos taurus
AQP11	aquaporin 11(AQP11)	Bos taurus
FEZ2	fasciculation and elongation protein zeta 2 (zygin II)(FEZ2)	Bos taurus
SPATA6L	spermatogenesis associated 6 like(SPATA6L)	Bos taurus
FAM168A	family with sequence similarity 168 member A(FAM168A)	Bos taurus
RNF122	ring finger protein 122(RNF122)	Bos taurus
ACYP1	acylphosphatase 1(ACYP1)	Bos taurus
FANCA	Fanconi anemia complementation group A(FANCA)	Bos taurus
INPP4B	inositol polyphosphate-4-phosphatase type II B(INPP4B)	Bos taurus
ZNF608	zinc finger protein 608(ZNF608)	Bos taurus
ASRGL1	asparaginase like 1(ASRGL1)	Bos taurus
SMOX	spermine oxidase(SMOX)	Bos taurus
VGLL1	vestigial like family member 1(VGLL1)	Bos taurus
PRMT2	protein arginine methyltransferase 2(PRMT2)	Bos taurus
CALCOCO1	calcium binding and coiled-coil domain 1(CALCOCO1)	Bos taurus
NDUFA4L2	NDUFA4, mitochondrial complex associated like 2(NDUFA4L2)	Bos taurus
UXS1	UDP-glucuronate decarboxylase 1(UXS1)	Bos taurus
TLE3	transducin like enhancer of split 3(TLE3)	Bos taurus
ME2	malic enzyme 2(ME2)	Bos taurus
DLL4	delta like canonical Notch ligand 4(DLL4)	Bos taurus
RNF24	ring finger protein 24(RNF24)	Bos taurus
GPR39	G protein-coupled receptor 39(GPR39)	Bos taurus
ATXN10	ataxin 10(ATXN10)	Bos taurus
WDR88	WD repeat domain 88(WDR88)	Bos taurus
C16H1orf100	chromosome 16 open reading frame, human C1orf100(C16H1orf100)	Bos taurus
SLC2A13	solute carrier family 2 member 13(SLC2A13)	Bos taurus
NEDD4L	neural precursor cell expressed, developmentally down-regulated 4-like, E3 ubiquitin protein ligase(NEDD4L)	Bos taurus
PLAC1	placenta specific 1(PLAC1)	Bos taurus
NLN	neurolysin (metallopeptidase M3 family)(NLN)	Bos taurus
HPS3	HPS3, biogenesis of lysosomal organelles complex 2 subunit 1(HPS3)	Bos taurus
ZFP3	ZFP3 zinc finger protein(ZFP3)	Bos taurus
DSP	desmoplakin(DSP)	Bos taurus
PPIF	peptidylprolyl isomerase F(PPIF)	Bos taurus
GRN	granulin precursor(GRN)	Bos taurus
CCL4	chemokine (C-C motif) ligand 4(CCL4)	Bos taurus
TMEM110	transmembrane protein 110(TMEM110)	Bos taurus
BEST3	bestrophin 3(BEST3)	Bos taurus
CD86	CD86 molecule(CD86)	Bos taurus
EYA3	EYA transcriptional coactivator and phosphatase 3(EYA3)	Bos taurus
PRR7	proline rich 7, synaptic(PRR7)	Bos taurus
ZNF566	zinc finger protein 566(ZNF566)	Bos taurus
DPF3	double PHD fingers 3(DPF3)	Bos taurus
FAF2	Fas associated factor family member 2(FAF2)	Bos taurus
PRSS8	protease, serine 8(PRSS8)	Bos taurus
UGCG	UDP-glucose ceramide glucosyltransferase(UGCG)	Bos taurus
LYRM7	LYR motif containing 7(LYRM7)	Bos taurus
LOC100299277	uncharacterized LOC100299277(LOC100299277)	Bos taurus
ARL6IP5	ADP ribosylation factor like GTPase 6 interacting protein 5(ARL6IP5)	Bos taurus
NLRP3	NLR family pyrin domain containing 3(NLRP3)	Bos taurus
NIP7	NIP7, nucleolar pre-rRNA processing protein(NIP7)	Bos taurus
WNT16	Wnt family member 16(WNT16)	Bos taurus
PKIA	protein kinase (cAMP-dependent, catalytic) inhibitor alpha(PKIA)	Bos taurus
CTNS	cystinosin, lysosomal cystine transporter(CTNS)	Bos taurus
ZNF585A	zinc finger protein 585A(ZNF585A)	Bos taurus
EAF2	ELL associated factor 2(EAF2)	Bos taurus
LOC618289	zinc finger protein 11-like(LOC618289)	Bos taurus
SOSTDC1	sclerostin domain containing 1(SOSTDC1)	Bos taurus
TMEM116	transmembrane protein 116(TMEM116)	Bos taurus
LYPD6	LY6/PLAUR domain containing 6(LYPD6)	Bos taurus
C18H16orf74	chromosome 18 open reading frame, human C16orf74(C18H16orf74)	Bos taurus
RND3	Rho family GTPase 3(RND3)	Bos taurus
CBS	cystathionine-beta-synthase(CBS)	Bos taurus
IL17RE	interleukin 17 receptor E(IL17RE)	Bos taurus
ISPD	isoprenoid synthase domain containing(ISPD)	Bos taurus
SLC10A5	solute carrier family 10 member 5(SLC10A5)	Bos taurus
DOPEY2	dopey family member 2(DOPEY2)	Bos taurus
SLC16A11	solute carrier family 16 member 11(SLC16A11)	Bos taurus
LYN	LYN proto-oncogene, Src family tyrosine kinase(LYN)	Bos taurus
SLC16A13	solute carrier family 16 member 13(SLC16A13)	Bos taurus
FXYD4	FXYD domain containing ion transport regulator 4(FXYD4)	Bos taurus
LOC510193	apolipoprotein L, 3-like(LOC510193)	Bos taurus
SYNGR1	synaptogyrin 1(SYNGR1)	Bos taurus
STEAP4	STEAP4 metalloreductase(STEAP4)	Bos taurus
GSTK1	glutathione S-transferase kappa 1(GSTK1)	Bos taurus
EPS8L1	EPS8 like 1(EPS8L1)	Bos taurus
LOC100337482	A-kinase anchor protein 13-like(LOC100337482)	Bos taurus
JAM2	junctional adhesion molecule 2(JAM2)	Bos taurus
HIPK2	homeodomain interacting protein kinase 2(HIPK2)	Bos taurus
FAM107B	family with sequence similarity 107 member B(FAM107B)	Bos taurus
MAPRE2	microtubule associated protein RP/EB family member 2(MAPRE2)	Bos taurus
TARBP1	TAR (HIV-1) RNA binding protein 1(TARBP1)	Bos taurus
PLD1	phospholipase D1, phosphatidylcholine-specific(PLD1)	Bos taurus
SELENBP1	selenium binding protein 1(SELENBP1)	Bos taurus
NOC4L	nucleolar complex associated 4 homolog(NOC4L)	Bos taurus
CYFIP2	cytoplasmic FMR1 interacting protein 2(CYFIP2)	Bos taurus
FOXI3	forkhead box I3(FOXI3)	Bos taurus
SVOPL	SVOP like(SVOPL)	Bos taurus
FYN	FYN proto-oncogene, Src family tyrosine kinase(FYN)	Bos taurus
THEM4	thioesterase superfamily member 4(THEM4)	Bos taurus
S100A14	S100 calcium binding protein A14(S100A14)	Bos taurus
APOLD1	apolipoprotein L domain containing 1(APOLD1)	Bos taurus
LCMT2	leucine carboxyl methyltransferase 2(LCMT2)	Bos taurus
PCDH7	protocadherin 7(PCDH7)	Bos taurus
CTPS2	CTP synthase 2(CTPS2)	Bos taurus
MIR93	microRNA 93(MIR93)	Bos taurus
SLC17A7	solute carrier family 17 member 7(SLC17A7)	Bos taurus
SUSD1	sushi domain containing 1(SUSD1)	Bos taurus
C23H6orf136	chromosome 23 open reading frame, human C6orf136(C23H6orf136)	Bos taurus
MIR30A	microRNA 30a(MIR30A)	Bos taurus
ARHGEF16	Rho guanine nucleotide exchange factor 16(ARHGEF16)	Bos taurus
SIPA1L1	signal induced proliferation associated 1 like 1(SIPA1L1)	Bos taurus
MCM2	minichromosome maintenance complex component 2(MCM2)	Bos taurus
VSIG10	V-set and immunoglobulin domain containing 10(VSIG10)	Bos taurus
OSBPL10	oxysterol binding protein like 10(OSBPL10)	Bos taurus
LOC613416	heme-binding protein 1 pseudogene(LOC613416)	Bos taurus
TMEM92	transmembrane protein 92(TMEM92)	Bos taurus
IL10RB	interleukin 10 receptor subunit beta(IL10RB)	Bos taurus
LGALS3BP	galectin 3 binding protein(LGALS3BP)	Bos taurus
NARF	nuclear prelamin A recognition factor(NARF)	Bos taurus
MIR25	microRNA 25(MIR25)	Bos taurus
SEMA3F	semaphorin 3F(SEMA3F)	Bos taurus
RGS3	regulator of G-protein signaling 3(RGS3)	Bos taurus
SCRN1	secernin 1(SCRN1)	Bos taurus
SLC25A29	solute carrier family 25 member 29(SLC25A29)	Bos taurus
RAD18	RAD18, E3 ubiquitin protein ligase(RAD18)	Bos taurus
MIR342	microRNA 342(MIR342)	Bos taurus
EPHA7	EPH receptor A7(EPHA7)	Bos taurus
VOPP1	vesicular, overexpressed in cancer, prosurvival protein 1(VOPP1)	Bos taurus
VEPH1	ventricular zone expressed PH domain containing 1(VEPH1)	Bos taurus
EMP2	epithelial membrane protein 2(EMP2)	Bos taurus
PRC1	protein regulator of cytokinesis 1(PRC1)	Bos taurus
KIF5C	kinesin family member 5C(KIF5C)	Bos taurus
ANTXR2	anthrax toxin receptor 2(ANTXR2)	Bos taurus
TRPV2	transient receptor potential cation channel subfamily V member 2(TRPV2)	Bos taurus
PNPLA6	patatin like phospholipase domain containing 6(PNPLA6)	Bos taurus
ZNF555	zinc finger protein 555(ZNF555)	Bos taurus
PDE7A	phosphodiesterase 7A(PDE7A)	Bos taurus
CA5B	carbonic anhydrase 5B(CA5B)	Bos taurus
[truncated: 597 more rows]

## Sheet: D - KEGG pathway
Table S1-D: KEGG pathways and associated DEGs
Category	Term	Count	%	PValue	Genes	List Total	Pop Hits	Pop Total	Fold Enrichment	Bonferroni	Benjamini	FDR
KEGG_PATHWAY	bta01100:Metabolic pathways	220	8.47784	3.5035e-07	ALAD, PTGS2, GBGT1, B3GALT5, SGMS1, UXS1, FAH, PRIM1, TRAK2, GPT2, PLD3, PLD1, LOC100125266, GATM, UGCG, CYP26A1, NME4, MGAT3, PRODH, GCNT4, GCNT3, CYP51A1, CHKB, ALDOC, ACAT1, ADA, PPAT, LPCAT1, IDH2, IDH1, GCNT1, DNMT3B, MGAT4A, DNMT3A, GCDH, NDUFA4L2, ACER2, TKT, CYP17A1, DHFR, GBE1, QPRT, CYP2R1, GK, FUK, PLA2G4B, ASAH1, MTHFD1, MTHFD2, XYLT1, PTGES, MCEE, SYNJ2, NOS2, ATP6V0D2, NT5C, MRI1, P…	996	1235	7550	1.35034	9.98447e-05	9.98447e-05	0.000464509
KEGG_PATHWAY	bta04142:Lysosome	37	1.42582	3.34721e-06	CLTB, LOC512464, GM2A, AP1G2, LGMN, ACP5, CTSA, ASAH1, GLB1, CD68, GNPTAB, NAGA, MCOLN1, ENTPD4, ATP6V0D2, GBA, IDUA, CLN3, CTSZ, LIPA, PLA2G15, CTSS, GNS, LAMP1, SLC17A5, CTSK, NPC2, GLA, CTSO, GAA, ATP6V0A1, CTSD, CTSC, CTNS, ATP6V0A4, ATP6V0A2	996	126	7550	2.22597	0.000953501	0.000476864	0.00443779
KEGG_PATHWAY	bta04510:Focal adhesion	52	2.00385	5.19244e-06	TLN2, PAK6, ARHGAP5, PAK3, PAK4, ZYX, PDGFD, PRKCA, MYLK3, PRKCG, VASP, PRKCB, VEGFC, CCND1, PDGFRA, COL1A2, RELN, COL1A1, IBSP, CAV1, XIAP, PPP1R12C, ITGB4, ITGA11, ELK1, ITGB5, ARHGAP35, MYL9, PTK2, DOCK1, RAC3, COMP, COL6A1, LAMB1, THBS1, SPP1, THBS4, PIK3R2, TNXB, FLT1, VAV3, ITGA1, ITGA2, IGF1, HGF, VAV2, CAPN2, KDR, LAMA2, LAMA3, ITGA6, FYN	996	208	7550	1.89508	0.00147875	0.000493161	0.00688415
KEGG_PATHWAY	bta05200:Pathways in cancer	83	3.19846	1.5019e-05	ADCY2, PTGS2, MITF, PPARG, SPI1, FGF10, LPAR3, MLH1, LPAR2, TGFB1, WNT2, AGTR1, PLCB4, SLC2A1, RALB, HHIP, NOS2, FGF1, PRKCA, WNT10B, AR, PTGER3, PTGER4, SKP2, FGF23, LEF1, CDK6, PRKCG, RB1, DAPK2, STK4, PRKCB, DAPK1, VEGFC, CCND1, LPAR6, PDGFRA, GNB5, MDM2, GNB4, WNT16, XIAP, GNAI1, KITLG, GNG11, KIT, TCF7L2, TCF7L1, PTK2, RASGRP3, RAC3, RASGRP1, NKX3-1, LAMB1, RUNX1, TRAF5, PIK3R2, TRAF3, CSF1R…	996	398	7550	1.58082	0.00427129	0.00106954	0.019911
KEGG_PATHWAY	bta04015:Rap1 signaling pathway	49	1.88825	0.000112736	ADCY2, GNAI1, TLN2, CSF1, LPAR3, KITLG, FGF10, LPAR2, KIT, PLCB4, RASGRP3, TIAM1, RAC3, TEK, RAPGEF6, RALB, RAPGEF5, PDGFD, FGF1, THBS1, INSR, ANGPT2, PIK3R2, CSF1R, PRKCA, FYB, FLT1, SIPA1L2, IGF1, SIPA1L3, FGF23, PRKCG, HGF, VASP, DOCK4, PRKCB, KDR, VEGFC, PLCE1, ADCY9, MAPK13, ID1, SIPA1L1, PDGFRA, EFNA5, PARD6G, PRKD3, F2R, LCP2	996	214	7550	1.73568	0.0316209	0.00640572	0.149368
KEGG_PATHWAY	bta05205:Proteoglycans in cancer	46	1.77264	0.000243015	WNT16, CAV1, TNF, CAMK2G, PPP1R12C, TLR2, ITGB5, ELK1, SDC4, PDCD4, TGFB1, WNT2, PTK2, GPC3, EZR, CD44, HPSE, TIAM1, ANK3, GAB1, CAMK2D, THBS1, GPC1, PIK3R2, FZD9, PRKCA, WNT10B, HSPG2, IGF1, ITGA2, PRKCG, HGF, FZD4, ITPR1, PLAUR, WNT2B, PRKCB, KDR, CBLC, CCND1, PLCE1, MAPK13, ARAF, MDM2, PTCH1, WNT7A	996	203	7550	1.71771	0.0669232	0.0114782	0.321721
KEGG_PATHWAY	bta04512:ECM-receptor interaction	25	0.963391	0.000255215	IBSP, TNXB, DAG1, ITGA11, ITGB4, HSPG2, ITGA1, ITGB5, ITGA2, SDC4, LAMA2, LAMA3, CD36, ITGA6, CD44, COMP, COL1A2, COL6A1, RELN, SV2B, COL1A1, LAMB1, THBS1, SPP1, THBS4	996	87	7550	2.17825	0.0701627	0.0103384	0.337847
KEGG_PATHWAY	bta00520:Amino sugar and nucleotide sugar metabolism	17	0.655106	0.00026646	CYB5R3, GNPDA1, LOC537017, GNE, CMAS, HK2, NPL, HK1, NAGK, UXS1, PMM1, GMPPB, GALK1, RENBP, GFPT2, TSTA3, FUK	996	48	7550	2.6847	0.0731386	0.00944898	0.352709
KEGG_PATHWAY	bta04151:PI3K-Akt signaling pathway	68	2.62042	0.000644595	TLR2, FGF10, LPAR3, LPAR2, EIF4EBP1, CREB3L4, PIK3AP1, PDGFD, FGF1, ANGPT2, PRL, INSR, SGK3, FGF23, CDK6, IL6R, IRS1, IFNAR2, VEGFC, CCND1, LPAR6, COL1A2, PDGFRA, GNB5, MDM2, EFNA5, RELN, GNB4, COL1A1, THEM4, IBSP, PHLPP2, CSF1, ITGB4, ITGA11, KITLG, ITGB5, GNG11, KIT, PTK2, COMP, TEK, GYS1, COL6A1, LAMB1, PPP2R2B, THBS1, SPP1, PIK3R2, CSF1R, THBS4, IL6, TNXB, FLT1, ITGA1, IGF1, ITGA2, HGF, KDR, …	996	347	7550	1.48548	0.167872	0.0202117	0.851265
KEGG_PATHWAY	bta05144:Malaria	17	0.655106	0.000924601	GYPC, ICAM1, IL6, CCL2, TNF, IL18, TLR2, HGF, IL10, TGFB1, VCAM1, CD36, COMP, PECAM1, IL1B, THBS1, THBS4	996	53	7550	2.43142	0.231745	0.0260188	1.21896
KEGG_PATHWAY	bta04960:Aldosterone-regulated sodium reabsorption	14	0.539499	0.000990008	PRKCA, FXYD4, ATP1B3, NR3C2, IGF1, PRKCG, SFN, IRS1, PRKCB, SCNN1G, NEDD4L, SCNN1A, INSR, PIK3R2	996	39	7550	2.72114	0.245947	0.0253364	1.30466
KEGG_PATHWAY	bta04014:Ras signaling pathway	49	1.88825	0.00108454	FGF10, FOXO4, PAK6, PAK3, TIAM1, PAK4, GAB1, RALB, RAPGEF5, PDGFD, FGF1, ANGPT2, INSR, PRKCA, PLD1, FGF23, PRKCG, STK4, PRKCB, VEGFC, PLCE1, KSR2, PDGFRA, GNB5, EFNA5, GNB4, KSR1, CSF1, ELK1, KITLG, GNG11, KIT, RASGRP3, RAC3, RASGRP1, TEK, PLA2G12B, RASA3, RASA2, CSF1R, PIK3R2, FLT1, IGF1, HGF, KDR, RASSF1, GNG10, PLA2G4B, ABL2	996	235	7550	1.58058	0.266011	0.0254425	1.42841
KEGG_PATHWAY	bta00512:Mucin type O-Glycan biosynthesis	12	0.462428	0.00181119	ST3GAL1, GALNT3, GCNT4, GCNT3, GALNT10, GALNT7, GALNT6, GALNT4, B3GNT6, GCNT1, C1GALT1, B4GALT5	996	32	7550	2.84262	0.403488	0.0389634	2.37488
KEGG_PATHWAY	bta05143:African trypanosomiasis	13	0.500963	0.00200948	PRKCA, ICAM1, IL6, TNF, THOP1, IL18, F2RL1, PRKCG, IL10, PRKCB, VCAM1, PLCB4, IL1B	996	37	7550	2.66336	0.436325	0.0401214	2.63169
KEGG_PATHWAY	bta04925:Aldosterone synthesis and secretion	21	0.809249	0.002549	PRKCA, HSD3B1, ADCY2, STAR, CYP11A1, CAMK2G, NR4A2, NPR1, PRKCG, PRKCE, CACNA1S, ITPR1, PRKCB, AGTR1, PLCB4, ADCY9, CAMK2D, CAMK1, SCARB1, CREB3L4, PRKD3	996	79	7550	2.01502	0.516833	0.0473359	3.32728
KEGG_PATHWAY	bta04360:Axon guidance	29	1.11753	0.00293985	PLXNC1, PLXNA1, GNAI1, FES, PAK6, PTK2, ROBO1, PAK3, RAC3, SEMA7A, SEMA3F, PAK4, PPP3CC, NFATC2, NFATC3, LIMK2, LIMK1, NTNG1, NTN4, EPHA1, SLIT2, SLIT3, NTN3, EPHA7, SEMA4G, FYN, RGS3, SEMA4F, EFNA5	996	125	7550	1.75863	0.567897	0.0510917	3.82832
KEGG_PATHWAY	bta04310:Wnt signaling pathway	31	1.19461	0.00305835	WNT16, CAMK2G, DAAM1, TCF7L2, TCF7L1, WNT2, PLCB4, RAC3, CAMK2D, PPP3CC, NFATC2, NFATC3, PRKCA, FZD9, WNT10B, SMAD4, LEF1, PRKCG, FZD4, PRKCB, WNT2B, DKK4, DKK2, CCND1, DKK1, SFRP2, CSNK1E, SIAH1, TBL1X, BAMBI, WNT7A	996	137	7550	1.71526	0.582289	0.0500548	3.97976
KEGG_PATHWAY	bta04070:Phosphatidylinositol signaling system	24	0.924855	0.00363003	PRKCA, INPP1, PIK3C2G, INPPL1, PI4KA, PRKCG, ITPKB, DGKH, ITPR1, PRKCB, DGKA, PLCE1, PLCB4, INPP5K, DGKE, DGKD, SYNJ2, PLCD4, INPP4B, PLCD1, INPP4A, INPP5B, INPP5A, PIK3R2	996	98	7550	1.85641	0.645285	0.0559537	4.70723
KEGG_PATHWAY	bta04931:Insulin resistance	26	1.00193	0.00445088	PPARA, SLC27A1, TNF, TRIB3, TNFRSF1A, SLC2A1, GYS1, TBC1D4, CREB3L4, INSR, PIK3R2, SREBF1, CPT1B, IL6, PTPRF, PRKAB2, MLXIPL, PRKAB1, PRKCE, IRS1, PPARGC1A, RPS6KA6, CD36, PYGL, GFPT2, SLC27A6	996	111	7550	1.77557	0.719542	0.0647227	5.74285
KEGG_PATHWAY	bta00051:Fructose and mannose metabolism	11	0.423892	0.00489429	GMPPB, KHK, SORD, ALDOC, AKR1B1, HK2, HK1, TSTA3, FUK, PMM1, ENOSF1	996	31	7550	2.68979	0.752983	0.0675267	6.29794
KEGG_PATHWAY	bta00670:One carbon pool by folate	8	0.308285	0.00573888	MTHFD1, SHMT1, MTHFD2, MTHFR, DHFR, MTR, ALDH1L2, MTHFD1L	996	18	7550	3.36903	0.806076	0.0751365	7.3469
KEGG_PATHWAY	bta04916:Melanogenesis	23	0.88632	0.00865161	PRKCA, FZD9, WNT10B, WNT16, ADCY2, GNAI1, CAMK2G, MITF, KITLG, LEF1, PRKCG, KIT, TCF7L2, FZD4, TCF7L1, WNT2B, PRKCB, WNT2, PLCB4, ADCY9, CAMK2D, CREB3L4, WNT7A	996	99	7550	1.76108	0.915958	0.106461	10.8818
KEGG_PATHWAY	bta00562:Inositol phosphate metabolism	18	0.693642	0.00936875	INPP1, PIK3C2G, INPPL1, PI4KA, ITPKB, ISYNA1, PLCE1, PLCB4, INPP5K, PLCH2, PLCH1, SYNJ2, PLCD4, INPP4B, PLCD1, INPP4A, INPP5B, INPP5A	996	71	7550	1.92177	0.93162	0.110093	11.7327
KEGG_PATHWAY	bta05146:Amoebiasis	25	0.963391	0.00997312	GNA14, RAB7B, GNA15, IL1R1, TNF, TLR2, TGFB1, IL10, PTK2, PLCB4, IL1B, NOS2, LAMB1, PIK3R2, PRKCA, IL6, PRKCG, PRKCB, C8G, LAMA2, SERPINB9, LAMA3, SERPINB6, COL1A2, COL1A1	996	112	7550	1.69204	0.942537	0.112215	12.444
KEGG_PATHWAY	bta05323:Rheumatoid arthritis	22	0.847784	0.0108009	ICAM1, IL6, CCL3, CCL2, FLT1, TNF, IL18, CSF1, TLR2, ACP5, ATP6V1G2, TGFB1, CTSK, CD86, CD80, TEK, IL1B, ATP6V0A1, ATP6V0A4, ATP6V0D2, IL1A, ATP6V0A2	996	95	7550	1.75544	0.954725	0.116443	13.4097
KEGG_PATHWAY	bta04066:HIF-1 signaling pathway	22	0.847784	0.0121631	PDK1, PRKCA, IL6, FLT1, CAMK2G, HK2, IGF1, HK1, PRKCG, IL6R, PRKCB, TIMP1, EIF4EBP1, SLC2A1, TEK, TCEB2, CAMK2D, LOC525947, NOS2, INSR, ANGPT2, PIK3R2	996	96	7550	1.73716	0.96943	0.125536	14.9774
KEGG_PATHWAY	bta04921:Oxytocin signaling pathway	30	1.15607	0.0130961	ADCY2, PTGS2, GNAI1, CAMK2G, PPP1R12C, CACNB2, ELK1, CACNB3, KCNJ12, CAMKK1, MYL9, PLCB4, CAMK2D, PPP3CC, NFATC2, NFATC3, PRKCA, MYLK3, PRKAB2, PRKAB1, NPR1, PRKCG, CACNA1S, ITPR1, PRKCB, CCND1, ADCY9, CAMK1, MAPK7, PLA2G4B	996	145	7550	1.56834	0.976648	0.129903	16.036
KEGG_PATHWAY	bta00564:Glycerophospholipid metabolism	22	0.847784	0.013659	PLD3, PLD1, PGS1, PLA2G15, LPGAT1, CHKB, DGKH, GPCPD1, CHPT1, PNPLA6, DGKA, LPCAT1, DGKE, DGKD, PLA2G12B, MBOAT1, MBOAT2, ETNK1, PHOSPHO1, PCYT1B, PTDSS1, PLA2G4B	996	97	7550	1.71925	0.980152	0.130631	16.6687
KEGG_PATHWAY	bta05410:Hypertrophic cardiomyopathy (HCM)	19	0.732177	0.0146314	IL6, TNF, PRKAB2, DAG1, PRKAB1, ITGA11, ITGA1, ITGB4, ITGA2, CACNB2, ITGB5, IGF1, CACNB3, CACNA1S, TGFB1, TNNT2, ACE, DES, ITGA6	996	80	7550	1.80033	0.985016	0.134851	17.7514
KEGG_PATHWAY	bta04380:Osteoclast differentiation	28	1.079	0.0148107	IL1R1, TNF, CSF1, MITF, PPARG, SPI1, ACP5, TGFB1, TNFRSF1A, IL1B, PPP3CC, NFATC2, IL1A, TEC, TYROBP, CSF1R, PIK3R2, IL6, TGFBR1, NOX1, SIRPA, IRF9, TYK2, IFNAR2, CTSK, MAPK13, FYN, LCP2	996	134	7550	1.58395	0.985773	0.132165	17.9495
KEGG_PATHWAY	bta04614:Renin-angiotensin system	9	0.346821	0.0155058	LNPEP, AGTR1, PREP, AGTR2, ACE, THOP1, CTSA, NLN, ENPEP	996	26	7550	2.62396	0.988366	0.133827	18.7138
KEGG_PATHWAY	bta04062:Chemokine signaling pathway	36	1.38728	0.0160836	CCL3, ADCY2, CCL2, FGR, GNAI1, PREX1, CXCL2, CXCL9, CCL8, GNG11, CCL28, CCL4, CXCL10, PTK2, PLCB4, TIAM1, PTK2B, PIK3R2, VAV3, LYN, LOC508666, HCK, VAV2, CCR5, ADCY9, ARRB1, CXCL16, GNG10, CX3CR1, GRK6, GNB5, JAK2, GNB4, GRK5	996	185	7550	1.47509	0.990158	0.134466	19.344
KEGG_PATHWAY	bta04620:Toll-like receptor signaling pathway	23	0.88632	0.0170839	IL6, CCL3, TNF, LY96, CXCL9, TLR2, TLR3, TLR5, TLR6, CCL4, TLR8, CXCL10, IFNAR2, CTSK, CD86, CD80, MAPK13, IRF7, IL1B, TRAF3, PIK3R2, SPP1	996	105	7550	1.66045	0.992635	0.138274	20.4244
KEGG_PATHWAY	bta05231:Choline metabolism in cancer	22	0.847784	0.0170864	PRKCA, PLD1, SLC44A2, WASF3, SLC44A4, CHKB, PRKCG, DGKH, GPCPD1, CHPT1, PRKCB, DGKA, EIF4EBP1, TSC1, DGKE, RAC3, DGKD, PDGFRA, PDGFD, PCYT1B, PLA2G4B, PIK3R2	996	99	7550	1.68452	0.99264	0.134512	20.4271
KEGG_PATHWAY	bta02010:ABC transporters	12	0.462428	0.0174446	ABCA7, ABCA9, ABCD3, ABCC1, ABCB1, CFTR, ABCC2, ABCA1, ABCA4, ABCA3, ABCG2, ABCC6	996	42	7550	2.16581	0.993366	0.133508	20.8107
KEGG_PATHWAY	bta00603:Glycosphingolipid biosynthesis - globo series	7	0.26975	0.0175753	ST3GAL1, GLA, GBGT1, B3GALT5, NAGA, FUT2	996	17	7550	3.12131	0.993613	0.130967	20.9503
KEGG_PATHWAY	bta04977:Vitamin digestion and absorption	8	0.308285	0.0191732	AWAT2, ABCC1, SLC5A6, SCARB1, SLC19A3, TCN2, LMBRD1, SLC52A3	996	22	7550	2.75648	0.995984	0.138534	22.6381
KEGG_PATHWAY	bta00480:Glutathione metabolism	14	0.539499	0.0206406	LAP3, MGST3, TXNDC12, GSR, GSTM3, GCLC, GSTA4, SRM, GSTK1, RRM1, IDH2, IDH1, GSTT1, GPX8	996	54	7550	1.96527	0.997379	0.144804	24.1586
KEGG_PATHWAY	bta04068:FoxO signaling pathway	27	1.04046	0.0217842	FOXO4, IL10, TGFB1, S1PR1, BCL6, INSR, PIK3R2, GABARAPL1, IL6, SGK3, TGFBR1, PRKAB2, PRKAB1, SMAD4, SKP2, IGF1, HOMER1, STK4, IRS1, TNFSF10, CCND1, CSNK1E, MAPK13, ARAF, MDM2, GADD45B, GADD45A	996	132	7550	1.55052	0.998121	0.148667	25.3245
KEGG_PATHWAY	bta00270:Cysteine and methionine metabolism	11	0.423892	0.0221699	MRI1, ADI1, DNMT3A, SRM, MTR, AHCYL2, ENOPH1, TAT, DNMT3B, CBS	996	38	7550	2.1943	0.998321	0.147633	25.7139
KEGG_PATHWAY	bta05142:Chagas disease (American trypanosomiasis)	24	0.924855	0.0229297	CFLAR, GNA14, IL6, CCL3, GNA15, CCL2, TNF, GNAI1, TGFBR1, TLR2, TLR6, IL10, TGFB1, C1QA, TNFRSF1A, C1QB, ACE, PLCB4, MAPK13, IL1B, NOS2, PPP2R2B, PIK3R2	996	114	7550	1.59586	0.998655	0.148916	26.4755
KEGG_PATHWAY	bta04146:Peroxisome	19	0.732177	0.0236007	HACL1, ECH1, EPHX2, DECR2, DDO, PEX7, PEX11A, FAR2, PECR, DHRS4, GSTK1, HAO2, IDH2, ABCD3, IDH1, DAO, NOS2, PEX10, ACSL5	996	84	7550	1.7146	0.998894	0.149616	27.1422
KEGG_PATHWAY	bta04666:Fc gamma R-mediated phagocytosis	19	0.732177	0.026387	PRKCA, PTPRC, PLD1, VAV3, LIMK2, WASF3, LYN, INPPL1, LIMK1, HCK, PRKCG, ASAP3, VAV2, PRKCE, VASP, PRKCB, GSN, BIN1, PIK3R2	996	85	7550	1.69442	0.99951	0.162421	29.8511
KEGG_PATHWAY	bta04670:Leukocyte transendothelial migration	24	0.924855	0.0276797	CLDN8, PRKCA, ICAM1, VAV3, CLDN3, GNAI1, PRKCG, ARHGAP35, VAV2, VASP, CLDN23, CDH5, THY1, PRKCB, MYL9, VCAM1, PTK2, ARHGAP5, EZR, MAPK13, PTK2B, PECAM1, JAM2, PIK3R2	996	116	7550	1.56834	0.999665	0.166246	31.0759
KEGG_PATHWAY	bta04520:Adherens junction	16	0.61657	0.0289684	PTPRJ, PTPRB, WASF3, PTPRF, TGFBR1, SMAD4, LEF1, LMO7, SNAI2, TCF7L2, TCF7L1, PVRL1, FYN, RAC3, YES1, INSR	996	68	7550	1.78361	0.99977	0.169873	32.2773
KEGG_PATHWAY	bta04640:Hematopoietic cell lineage	20	0.770713	0.029248	IL1R1, IL6, TNF, CSF1, ITGA1, ITGA2, KITLG, KIT, IL6R, CD55, CD19, CD36, ITGA6, CD44, CD34, CD59, IL1B, CD5, IL1A, CSF1R	996	92	7550	1.6479	0.999788	0.167992	32.5354
KEGG_PATHWAY	bta04610:Complement and coagulation cascades	17	0.655106	0.0293089	F12, C5AR1, F9, SERPING1, PLAUR, C8G, C1QA, C1QB, CD55, THBD, CD59, F3, SERPINA5, SERPINC1, TFPI, PROS1, F2R	996	74	7550	1.74143	0.999792	0.165048	32.5915
KEGG_PATHWAY	bta00561:Glycerolipid metabolism	15	0.578035	0.0322234	LPL, MOGAT1, DGKH, PNPLA2, PNPLA3, DGKA, GLA, DGKE, DGKD, AKR1B1, MBOAT1, MGLL, MBOAT2, GK	996	63	7550	1.80484	0.999912	0.176735	35.2261
KEGG_PATHWAY	bta03320:PPAR signaling pathway	16	0.61657	0.0367145	SLC27A1, CPT1B, LPL, PPARA, OLR1, PPARG, FADS2, AQP7, DBI, CYP4A22, CD36, SLC27A6, GK, FABP5, PLTP, ACSL5	996	70	7550	1.73264	0.999977	0.195523	39.1001
KEGG_PATHWAY	bta04390:Hippo signaling pathway	29	1.11753	0.0367629	WNT16, TCF7L2, LLGL1, TCF7L1, TGFB1, WNT2, TEAD4, FGF1, PPP2R2B, FZD9, WNT10B, TGFBR1, SMAD4, TEAD1, LEF1, SMAD1, SNAI2, WWTR1, FZD4, STK3, WNT2B, CCND1, CSNK1E, ID1, RASSF1, AMOT, PARD6G, BMPR1B, WNT7A	996	151	7550	1.45582	0.999977	0.192246	39.1406
KEGG_PATHWAY	bta05412:Arrhythmogenic right ventricular cardiomyopathy (ARVC)	15	0.578035	0.0410278	DAG1, ITGA1, ITGB4, ITGA11, ITGA2, ITGB5, LEF1, CACNB2, CACNB3, TCF7L2, CACNA1S, TCF7L1, DES, ITGA6, DSP	996	65	7550	1.7493	0.999993	0.208724	42.618
KEGG_PATHWAY	bta04060:Cytokine-cytokine receptor interaction	39	1.50289	0.0410991	IL1R1, CCL3, TNF, CCL2, CSF1, IL18, CXCL9, CCL8, CNTFR, CCL28, CCL4, TGFB1, IL10, CXCL10, IL17RB, TNFRSF1A, TNFRSF1B, IL17B, IL10RB, IL1B, TNFRSF19, PRL, IL1A, CSF1R, AMHR2, IL6, TGFBR1, LIFR, IL6R, IFNAR2, TNFSF10, CCR5, IL20RA, CXCL16, CX3CR1, BMPR1B, MPL	996	218	7550	1.35611	0.999994	0.205478	42.6745
KEGG_PATHWAY	bta04115:p53 signaling pathway	16	0.61657	0.0411032	ZMAT3, IGF1, CDK6, SFN, SESN2, SESN3, TP53I3, CCND1, SERPINB5, SHISA5, MDM2, SIAH1, GADD45B, THBS1, GADD45A, IGFBP3	996	71	7550	1.70824	0.999994	0.20204	42.6777
KEGG_PATHWAY	bta04668:TNF signaling pathway	22	0.847784	0.0414378	CFLAR, ICAM1, IL6, CCL2, TNF, PTGS2, CSF1, CXCL2, CXCL10, VCAM1, TNFRSF1A, TNFRSF1B, MAPK13, CASP7, RIPK3, IL1B, CREB3L4, TNFAIP3, TRAF5, TRAF3, PIK3R2	996	108	7550	1.54414	0.999994	0.200173	42.9424
KEGG_PATHWAY	bta00052:Galactose metabolism	9	0.346821	0.0432606	GALK1, GALM, GLA, AKR1B1, HK2, GAA, HK1, GLB1	996	31	7550	2.20074	0.999997	0.2048	44.3643
KEGG_PATHWAY	bta01130:Biosynthesis of antibiotics	37	1.42582	0.0443913	BCAT1, CYP51A1, ALDOC, HK2, HK1, LSS, ACSS2, ACAT1, PPAT, ISYNA1, ACSS1, GALM, IDH2, IDH1, DAO, NSDHL, BCKDHA, SHMT1, GCDH, ACY1, AK1, BPGM, TKT, AK4, TAT, NME4, SDHB, DBT, PYCR2, HAO2, GFPT2, PLA2G7, PGK1, PRPS2, PCCA, CBS, PRODH	996	206	7550	1.36151	0.999998	0.20633	45.2298
KEGG_PATHWAY	bta04971:Gastric acid secretion	16	0.61657	0.0458534	PRKCA, ADCY2, ATP1B3, GNAI1, CAMK2G, MYLK3, CFTR, PRKCG, ITPR1, PRKCB, PLCB4, EZR, ADCY9, CAMK2D, KCNE2, SST	996	72	7550	1.68452	0.999998	0.209184	46.3305
KEGG_PATHWAY	bta00600:Sphingolipid metabolism	12	0.462428	0.0505677	ACER3, GLA, SGPP1, ACER2, UGCG, CERS6, SGMS1, B4GALT6, ASAH1, GBA, GLB1	996	49	7550	1.85641	1	0.22507	49.7418
KEGG_PATHWAY	bta04723:Retrograde endocannabinoid signaling	21	0.809249	0.0506093	PRKCA, ADCY2, PTGS2, GNAI1, ABHD6, GNG11, PRKCG, CACNA1S, ITPR1, PRKCB, SLC17A7, PLCB4, NAPEPLD, ADCY9, MAPK13, FAAH, GNG10, GNB5, MGLL, GNB4	996	104	7550	1.53064	1	0.221878	49.7709
KEGG_PATHWAY	bta05020:Prion diseases	9	0.346821	0.051276	NCAM1, C1QA, C1QB, IL6, FYN, IL1B, ELK1, IL1A, C8G	996	32	7550	2.13197	1	0.22122	50.2366
KEGG_PATHWAY	bta04923:Regulation of lipolysis in adipocytes	13	0.500963	0.0513174	PTGER3, ADCY2, PTGS2, GNAI1, NPR1, PNPLA2, AQP7, PRKG2, IRS1, ADCY9, MGLL, INSR, PIK3R2	996	55	7550	1.79171	1	0.218181	50.2654
KEGG_PATHWAY	bta04650:Natural killer cell mediated cytotoxicity	23	0.88632	0.0519064	PRKCA, ICAM1, IL6, VAV3, TNF, PRKCG, VAV2, PRKCB, NCR3, CD48, IFNAR2, TNFSF10, FYN, RAC3, PTK2B, ARAF, PPP3CC, NFATC2, ULBP27, TYROBP, PIK3R2, LCP2, SH3BP2	996	117	7550	1.49015	1	0.217309	50.6732
KEGG_PATHWAY	bta04913:Ovarian steroidogenesis	12	0.462428	0.0574406	CYP17A1, HSD3B1, ADCY2, CYP11A1, STAR, PTGS2, ADCY9, IGF1, SCARB1, INSR, PLA2G4B, CYP19A1	996	50	7550	1.81928	1	0.234795	54.3571
KEGG_PATHWAY	bta04721:Synaptic vesicle cycle	14	0.539499	0.0643346	STX1A, STX3, CLTB, AP2S1, STXBP1, ATP6V1G2, NAPA, SLC17A7, ATP6V0A1, ATP6V0A4, UNC13B, ATP6V0D2, DNM1, ATP6V0A2	996	63	7550	1.68452	1	0.256302	58.5902
KEGG_PATHWAY	bta01200:Carbon metabolism	21	0.809249	0.0759083	ME1, SHMT1, ME2, ALDOC, HK2, HK1, TKT, ACSS2, ACAT1, SDHB, ACSS1, MTHFR, MCEE, HAO2, IDH2, IDH1, PGK1, GPT2, PRPS2, PCCA, PC	996	109	7550	1.46043	1	0.292586	64.8897
KEGG_PATHWAY	bta01230:Biosynthesis of amino acids	15	0.578035	0.0773181	BCAT1, SHMT1, PYCR2, ACY1, ALDOC, MTR, IDH2, IDH1, TKT, PGK1, TAT, GPT2, PRPS2, CBS, PC	996	71	7550	1.60148	1	0.293539	65.5933
KEGG_PATHWAY	bta04020:Calcium signaling pathway	33	1.27168	0.0788675	PHKA2, GNA14, GNA15, ADCY2, CAMK2G, ITPKB, AGTR1, ATP2B4, PLCB4, PDE1B, PTK2B, CAMK2D, PPP3CC, PLCD4, PLCD1, NOS2, PRKCA, SLC8A1, PTGER3, MYLK3, STIM2, PRKCG, PTGFR, CACNA1S, ITPR1, PRKCB, PPIF, P2RX4, PLCE1, ADCY9, ATP2A3, PDGFRA, F2R	996	189	7550	1.32355	1	0.294924	66.3515
KEGG_PATHWAY	bta04750:Inflammatory mediator regulation of TRP channels	20	0.770713	0.0849324	PRKCA, IL1R1, ADCY2, PTGER4, TRPV2, CAMK2G, F2RL1, IGF1, PRKCG, PRKCE, ITPR1, PRKCB, PLCB4, CYP4A22, ADCY9, MAPK13, CAMK2D, IL1B, PLA2G4B, PIK3R2	996	104	7550	1.45775	1	0.310644	69.1732
KEGG_PATHWAY	bta04810:Regulation of actin cytoskeleton	36	1.38728	0.0910314	ENAH, SSH3, PPP1R12C, ITGA11, ITGB4, IQGAP3, FGF10, ITGB5, ARHGAP35, MYL9, PAK6, PTK2, DOCK1, EZR, TIAM1, PAK3, GSN, RAC3, PAK4, PDGFD, FGF1, PIK3R2, VAV3, LIMK2, LIMK1, MYLK3, ITGA1, NCKAP1L, ITGA2, FGF23, VAV2, ITGA6, ARAF, CYFIP2, PDGFRA, F2R	996	212	7550	1.28722	1	0.3258	71.7888
KEGG_PATHWAY	bta04961:Endocrine and other factor-regulated calcium reabsorption	10	0.385356	0.092838	PRKCA, VDR, CLTB, PLCB4, ATP1B3, ADCY9, AP2S1, PRKCG, DNM1, PRKCB	996	42	7550	1.80484	1	0.327462	72.5232
KEGG_PATHWAY	bta05414:Dilated cardiomyopathy	17	0.655106	0.0947029	TNF, ADCY2, DAG1, ITGA11, ITGA1, ITGB4, ITGA2, CACNB2, ITGB5, IGF1, CACNB3, CACNA1S, TGFB1, TNNT2, DES, ITGA6, ADCY9	996	86	7550	1.49844	1	0.329257	73.2627

## Sheet: E - GO terms
Table S1-E: Annotation Clusters of GO terms (enrichment score > 2) and associated DEGs
Annotation Cluster 1	Enrichment Score: 9.474093514756627
Category	Term	Count	%	PValue	Genes	List Total	Pop Hits	Pop Total	Fold Enrichment	Bonferroni	Benjamini	FDR
GOTERM_CC_FAT	GO:0044421~extracellular region part	535	20.6166	2.91058e-11	LTBP1, RP2, SELENBP1, FAH, B2M, OGN, HMCN1, HIST1H2BN, FAP, PLS1, ADAM9, KRR1, WNT10B, TNIK, GATM, PTPRF, PCBD1, LIFR, SIPA1L3, F9, COLEC12, SERPING1, PLAUR, THY1, ADAMTS9, NPC2, NAPEPLD, F3, ADAMTS1, ADAMTS3, IBSP, OSTF1, GNAI1, ACP5, NAGK, IL17D, RPS28, IL17B, RAC3, FAM213A, NAGA, PLTP, TUBB4A, SPP1, MGAT4A, GGH, CCDC80, PCDH12, PIBF1, HGF, ACPP, GAS6, TGFBR3, NXPE4, PAPPA2, SMURF1, MSR1, SLC20…	1611	3002	11399	1.261	2.57296e-08	2.57296e-08	4.52634e-08
GOTERM_CC_FAT	GO:0070062~extracellular exosome	401	15.4528	1.7386e-10	RP2, SELENBP1, FAH, B2M, OGN, HIST1H2BN, HMCN1, PLS1, ADAM9, TNIK, GATM, PTPRF, PCBD1, LIFR, F9, SERPING1, COLEC12, THY1, PLAUR, NPC2, NAPEPLD, F3, ADAMTS3, OSTF1, GNAI1, ACP5, NAGK, RPS28, FAM213A, RAC3, NAGA, TUBB4A, SPP1, MGAT4A, GGH, PCDH12, GAS6, ACPP, TGFBR3, NXPE4, PAPPA2, SMURF1, SLC20A2, FAM3C, GPLD1, ASAH1, MTHFD1, SMPDL3A, SERPINA5, CREG1, TRPV6, FMNL1, ZDHHC1, STX3, PEPD, LYN, TTC38, …	1611	2162	11399	1.31238	1.53692e-07	7.68462e-08	2.70376e-07
GOTERM_CC_FAT	GO:0043230~extracellular organelle	402	15.4913	2.9144e-10	RP2, SELENBP1, FAH, B2M, OGN, HIST1H2BN, HMCN1, PLS1, ADAM9, TNIK, GATM, PTPRF, PCBD1, LIFR, F9, SERPING1, COLEC12, THY1, PLAUR, NPC2, NAPEPLD, F3, ADAMTS3, OSTF1, GNAI1, ACP5, NAGK, RPS28, FAM213A, RAC3, NAGA, TUBB4A, SPP1, MGAT4A, GGH, PCDH12, GAS6, ACPP, TGFBR3, NXPE4, PAPPA2, SMURF1, SLC20A2, FAM3C, GPLD1, ASAH1, MTHFD1, SMPDL3A, SERPINA5, CREG1, TRPV6, FMNL1, ZDHHC1, STX3, PEPD, LYN, TTC38, …	1611	2176	11399	1.30719	2.57633e-07	8.58776e-08	4.53227e-07
GOTERM_CC_FAT	GO:1903561~extracellular vesicle	401	15.4528	3.98569e-10	RP2, SELENBP1, FAH, B2M, OGN, HIST1H2BN, HMCN1, PLS1, ADAM9, TNIK, GATM, PTPRF, PCBD1, LIFR, F9, SERPING1, COLEC12, THY1, PLAUR, NPC2, NAPEPLD, F3, ADAMTS3, OSTF1, GNAI1, ACP5, NAGK, RPS28, FAM213A, RAC3, NAGA, TUBB4A, SPP1, MGAT4A, GGH, PCDH12, GAS6, ACPP, TGFBR3, NXPE4, PAPPA2, SMURF1, SLC20A2, FAM3C, GPLD1, ASAH1, MTHFD1, SMPDL3A, SERPINA5, CREG1, TRPV6, FMNL1, ZDHHC1, STX3, PEPD, LYN, TTC38, …	1611	2175	11399	1.30454	3.52335e-07	8.80837e-08	6.19827e-07
GOTERM_CC_FAT	GO:0005576~extracellular region	582	22.4277	1.25455e-09	LTBP1, RP2, SELENBP1, FAH, B2M, OGN, HMCN1, HIST1H2BN, FAP, PLS1, ADAM9, KRR1, WNT10B, TNIK, PTPRF, GATM, PCBD1, LIFR, SIPA1L3, F9, COLEC12, SERPING1, PLAUR, THY1, ADAMTS9, NPC2, NAPEPLD, F3, TFPI, ADAMTS1, ADAMTS3, IBSP, OSTF1, GNAI1, ACP5, ESM1, NAGK, IL17D, RPS28, IL17B, RAC3, FAM213A, NAGA, PLTP, TUBB4A, SPP1, MGAT4A, GGH, CCDC80, PCDH12, PIBF1, HGF, ACPP, GAS6, PI3, LOC510193, TGFBR3, NXPE4,…	1611	3382	11399	1.21764	1.10902e-06	2.21804e-07	1.95099e-06
GOTERM_CC_FAT	GO:0031988~membrane-bounded vesicle	472	18.1888	1.93963e-09	RP2, VPS53, SELENBP1, ITSN1, FAH, B2M, OGN, MALL, HMCN1, HIST1H2BN, PLS1, ADAM9, TNIK, GATM, PTPRF, PCBD1, LIFR, F9, COLEC12, SERPING1, THY1, PLAUR, NPC2, UNC13D, NAPEPLD, SCYL1, F3, ADAMTS3, IBSP, OSTF1, GNAI1, ACP5, NAGK, RPS28, RAC3, FAM213A, NAGA, TUBB4A, SPP1, MGAT4A, GGH, PCDH12, KCNK1, ACPP, GAS6, TGFBR3, NXPE4, PAPPA2, SMURF1, SLC20A2, FAM3C, GPLD1, ASAH1, MTHFD1, SMPDL3A, SERPINA5, CREG1…	1611	2661	11399	1.25507	1.71463e-06	2.85772e-07	3.01638e-06
Annotation Cluster 2	Enrichment Score: 7.768879748691379
Category	Term	Count	%	PValue	Genes	List Total	Pop Hits	Pop Total	Fold Enrichment	Bonferroni	Benjamini	FDR
GOTERM_CC_FAT	GO:0098589~membrane region	63	2.42775	1.54041e-08	CLTB, AP2S1, SLC6A4, TLR2, AQP1, TLR6, ITSN1, DAB2, MALL, S1PR1, HPSE, PACSIN2, SDPR, AAK1, SLC2A1, GPC1, INSR, AHNAK, ICAM1, LYN, NFAM1, IRS1, LDLRAP1, THY1, CD36, ARRB1, RANGRF, EMP2, LCP2, CAV1, TNF, DAG1, HK1, PLVAP, ABCA1, GPRC5B, TNFRSF1A, TNFRSF1B, EZR, STX12, TEK, SCARB1, MYOF, FCHO2, KCNE3, SLC8A1, OLR1, MYO1C, TGFBR1, S100A10, CAPN2, KDR, ANXA2, EPS15, LAMP1, CBLC, FYN, PECAM1, CMTM8, L…	1611	216	11399	2.06375	1.36171e-05	1.94531e-06	2.39554e-05
GOTERM_CC_FAT	GO:0098857~membrane microdomain	53	2.04239	1.79004e-08	SLC6A4, TLR2, AQP1, TLR6, S1PR1, MALL, PACSIN2, HPSE, SDPR, SLC2A1, GPC1, INSR, AHNAK, ICAM1, LYN, NFAM1, IRS1, THY1, CD36, RANGRF, EMP2, LCP2, CAV1, TNF, DAG1, HK1, PLVAP, ABCA1, GPRC5B, TNFRSF1A, TNFRSF1B, EZR, STX12, TEK, SCARB1, MYOF, KCNE3, SLC8A1, OLR1, MYO1C, TGFBR1, S100A10, CAPN2, ANXA2, KDR, CBLC, LAMP1, FYN, PECAM1, CMTM8, LRP8, PGK1, F2R	1611	169	11399	2.21902	1.58238e-05	1.97799e-06	2.78375e-05
GOTERM_CC_FAT	GO:0045121~membrane raft	53	2.04239	1.79004e-08	SLC6A4, TLR2, AQP1, TLR6, S1PR1, MALL, PACSIN2, HPSE, SDPR, SLC2A1, GPC1, INSR, AHNAK, ICAM1, LYN, NFAM1, IRS1, THY1, CD36, RANGRF, EMP2, LCP2, CAV1, TNF, DAG1, HK1, PLVAP, ABCA1, GPRC5B, TNFRSF1A, TNFRSF1B, EZR, STX12, TEK, SCARB1, MYOF, KCNE3, SLC8A1, OLR1, MYO1C, TGFBR1, S100A10, CAPN2, ANXA2, KDR, CBLC, LAMP1, FYN, PECAM1, CMTM8, LRP8, PGK1, F2R	1611	169	11399	2.21902	1.58238e-05	1.97799e-06	2.78375e-05
Annotation Cluster 3	Enrichment Score: 7.019422949168483
Category	Term	Count	%	PValue	Genes	List Total	Pop Hits	Pop Total	Fold Enrichment	Bonferroni	Benjamini	FDR
GOTERM_BP_FAT	GO:0006629~lipid metabolic process	191	7.36031	5.55839e-11	STAR, PTGS2, SGMS1, ACSS2, GPCPD1, TGFB1, ST3GAL1, ELOVL1, PECR, AGTR1, ST3GAL4, ST3GAL6, ELOVL2, SLCO1C1, ELOVL7, GGTA1, PLD3, WNT10B, PDPN, FA2H, TTC7B, UGCG, PRKAB1, MLXIPL, FGF23, CYP26A1, PNPLA2, PPARGC1A, PNPLA3, CHPT1, IRS1, PNPLA6, PLCE1, NPC2, NAPEPLD, SULT1B1, PDGFRA, CRTC3, ARV1, ENPP6, RBP4, HACL1, CAV1, RBP1, FGR, CYP51A1, FDX1, CHKB, CERS6, ABCA1, ABCA4, SESN2, ACAT1, VDR, SERINC5, …	1879	878	13541	1.5677	4.55176e-07	4.55176e-07	1.11271e-07
GOTERM_BP_FAT	GO:0044255~cellular lipid metabolic process	141	5.43353	6.82888e-08	STAR, PTGS2, SGMS1, GPCPD1, TGFB1, ST3GAL1, ELOVL1, AGTR1, PECR, ST3GAL4, ST3GAL6, ELOVL2, ELOVL7, GGTA1, PDPN, FA2H, TTC7B, UGCG, PRKAB1, MLXIPL, CYP26A1, PNPLA2, PPARGC1A, PNPLA3, CHPT1, IRS1, NAPEPLD, PDGFRA, HACL1, RBP4, ARV1, CAV1, RBP1, FGR, CHKB, CERS6, SESN2, ABCA4, ACAT1, SERINC5, ISYNA1, KDELC2, LPCAT1, PLCH2, APOBR, TEK, NAGA, SCARB1, CSF1R, SREBF1, ACER3, LPL, GCDH, PTGR1, DHDDS, PTGR…	1879	658	13541	1.54425	0.000559061	3.72804e-05	0.000136705
GOTERM_BP_FAT	GO:0008610~lipid biosynthetic process	79	3.04432	0.000230374	CYB5R3, SLC27A1, PTGES2, STAR, PTGS2, GPLD1, ALG5, LSS, SGMS1, ACSS2, PEX7, ST3GAL1, ELOVL1, CYP39A1, ST3GAL4, PTGES, ANG, FITM2, ST3GAL6, ELOVL2, ELOVL7, PTDSS1, FGF1, PRL, GGTA1, PIGA, CYR61, PGAP2, CYP11A1, INPPL1, FA2H, UGCG, PIGV, PRKAB1, MLXIPL, DECR2, CFTR, MID1IP1, CHPT1, ST6GALNAC2, ACADVL, PTGDS, ORMDL3, PGS1, HSD3B1, TNF, RBP1, FDX1, CYP51A1, ABHD6, CHKB, CERS6, TRIB3, MIF, VDR, ISYNA1…	1879	382	13541	1.49035	0.848436	0.0181512	0.460168
Annotation Cluster 4	Enrichment Score: 6.651407508829687
Category	Term	Count	%	PValue	Genes	List Total	Pop Hits	Pop Total	Fold Enrichment	Bonferroni	Benjamini	FDR
GOTERM_BP_FAT	GO:0016477~cell migration	181	6.97495	3.92663e-09	TSPAN1, TUBB2B, PLXNA1, F2RL1, RASGEF1A, ENPEP, AQP1, TGFB1, PRKX, KANK1, MMRN2, CXCL10, AGTR1, DAB2, S1PR1, TIAM1, ROBO1, FAP, SEMA7A, CCBE1, PDGFD, INSR, IL1A, S100A2, ADAM9, TYRO3, SATB2, C5AR1, PTPRF, EMX2, FUT10, THY1, HES1, VEGFC, TNS3, TNS1, TACSTD2, CD34, DLL4, CX3CR1, SIX1, RIPK3, PDGFRA, HAS2, BIN3, RELN, STC1, COL1A1, EMP2, MYO18A, IL1R1, CCL3, CCL2, FGR, ITGA11, DAG1, CCL8, ANLN, ASAP…	1879	863	13541	1.51144	3.21546e-05	5.35918e-06	7.86057e-06
GOTERM_BP_FAT	GO:0048870~cell motility	196	7.55299	1.35645e-08	TUBB2B, AQP1, PRKX, AGTR1, ATP2B4, S1PR1, FAP, SEMA7A, CCSAP, GAB1, CCBE1, S100A2, ADAM9, TYRO3, C5AR1, PTPRF, PDPN, EMX2, THY1, HES1, VEGFC, CD34, TACSTD2, CX3CR1, PDGFRA, HAS2, BIN3, STC1, MYO18A, IL1R1, DAG1, ITGA11, ASAP3, ADA, FUZ, LAMB1, GCNT1, PLTP, OSBPL8, TGFBR1, CCDC80, NCKAP1L, CELSR1, HGF, EPHA1, S100A14, GAS6, KDR, LAMA2, EPS8, SFRP2, NRP2, TBX20, MITF, GPLD1, SEMA3F, FGF1, ANGPT2, C…	1879	967	13541	1.46067	0.000111073	9.25656e-06	2.71542e-05
GOTERM_BP_FAT	GO:0051674~localization of cell	196	7.55299	1.35645e-08	TUBB2B, AQP1, PRKX, AGTR1, ATP2B4, S1PR1, FAP, SEMA7A, CCSAP, GAB1, CCBE1, S100A2, ADAM9, TYRO3, C5AR1, PTPRF, PDPN, EMX2, THY1, HES1, VEGFC, CD34, TACSTD2, CX3CR1, PDGFRA, HAS2, BIN3, STC1, MYO18A, IL1R1, DAG1, ITGA11, ASAP3, ADA, FUZ, LAMB1, GCNT1, PLTP, OSBPL8, TGFBR1, CCDC80, NCKAP1L, CELSR1, HGF, EPHA1, S100A14, GAS6, KDR, LAMA2, EPS8, SFRP2, NRP2, TBX20, MITF, GPLD1, SEMA3F, FGF1, ANGPT2, C…	1879	967	13541	1.46067	0.000111073	9.25656e-06	2.71542e-05
GOTERM_BP_FAT	GO:0040011~locomotion	216	8.3237	4.29069e-08	TUBB2B, AQP1, PRKX, AGTR1, OGN, ATP2B4, S1PR1, CCSAP, FAP, SEMA7A, GAB1, CCBE1, ADAM9, S100A2, TYRO3, C5AR1, PTPRF, PDPN, KIF5C, EMX2, THY1, HES1, VEGFC, CCR5, TACSTD2, CD34, CX3CR1, PDGFRA, EFNA5, BIN3, STC1, HAS2, MYO18A, IL1R1, DAG1, ITGA11, ASAP3, ADA, FUZ, LAMB1, GCNT1, PLTP, OSBPL8, TGFBR1, CCDC80, SMAD4, NCKAP1L, CELSR1, HGF, EPHA1, S100A14, GAS6, KDR, LAMA2, EPHA7, EPS8, SFRP2, SPNS1, NRP…	1879	1103	13541	1.41124	0.000351303	2.50972e-05	8.58938e-05
GOTERM_BP_FAT	GO:0030334~regulation of cell migration	115	4.4316	1.02201e-07	PLXNA1, F2RL1, AQP1, TGFB1, KANK1, PRKX, MMRN2, CXCL10, DAB2, ROBO1, SEMA7A, CCBE1, GAB1, PDGFD, INSR, IL1A, ADAM9, C5AR1, THY1, VEGFC, TACSTD2, DLL4, PDGFRA, RIPK3, HAS2, RELN, STC1, COL1A1, EMP2, PLXNC1, CCL3, IL1R1, CCL2, FGR, DAG1, CCL4, ADA, TIMP1, FUZ, PTK2, TEK, LAMB1, CSF1R, CYP19A1, MYO1C, OSBPL8, TGFBR1, PODXL, NCKAP1L, HGF, DOCK5, EPHA1, S100A14, GAS6, KDR, DOCK4, LAMA2, SFRP2, CXCL16,…	1879	512	13541	1.61865	0.00083657	5.23061e-05	0.000204591
GOTERM_BP_FAT	GO:0051270~regulation of cellular component movement	125	4.81696	2.46896e-07	PLXNA1, F2RL1, AQP1, TGFB1, PRKX, KANK1, MMRN2, CXCL10, DAB2, ROBO1, CCSAP, SEMA7A, CCBE1, GAB1, PDGFD, INSR, IL1A, ADAM9, C5AR1, PDPN, THY1, VEGFC, TACSTD2, DLL4, RIPK3, PDGFRA, DSP, HAS2, RELN, STC1, COL1A1, EMP2, PLXNC1, CCL3, IL1R1, CAV1, CCL2, FGR, DAG1, CCL4, ADA, TIMP1, FUZ, PTK2, TEK, LAMB1, CSF1R, CYP19A1, MYO1C, OSBPL8, TGFBR1, PODXL, NCKAP1L, HGF, DOCK5, S100A14, EPHA1, GAS6, KDR, DOCK…	1879	578	13541	1.5585	0.00201979	0.000118924	0.000494252
GOTERM_BP_FAT	GO:2000145~regulation of cell motility	117	4.50867	4.65536e-07	PLXNA1, F2RL1, AQP1, TGFB1, KANK1, PRKX, MMRN2, CXCL10, DAB2, ROBO1, CCSAP, SEMA7A, CCBE1, GAB1, PDGFD, INSR, IL1A, ADAM9, C5AR1, THY1, VEGFC, TACSTD2, DLL4, PDGFRA, RIPK3, HAS2, RELN, STC1, COL1A1, EMP2, PLXNC1, CCL3, IL1R1, CCL2, FGR, DAG1, CCL4, ADA, TIMP1, FUZ, PTK2, TEK, LAMB1, CSF1R, CYP19A1, MYO1C, OSBPL8, TGFBR1, PODXL, NCKAP1L, HGF, DOCK5, EPHA1, S100A14, GAS6, KDR, DOCK4, LAMA2, SFRP2, …	1879	538	13541	1.56721	0.00380502	0.000200626	0.000931937
GOTERM_BP_FAT	GO:0051272~positive regulation of cellular component movement	76	2.92871	8.99184e-07	F2RL1, GPLD1, AQP1, TGFB1, CXCL10, DAB2, SEMA7A, SEMA3F, CCBE1, PDGFD, FAM83H, FGF1, INSR, IL1A, ADAM9, CYR61, PRKCA, ICAM1, C5AR1, LYN, PDPN, LEF1, PRKCE, DAPK2, VEGFC, SEMA4G, SEMA4F, ITGB1BP1, EPB41L5, PLA2G7, PDGFRA, HAS2, RELN, COL1A1, MEGF8, CCL3, IL1R1, CCL2, FGR, CSF1, CXCL2, CXCL9, KITLG, PLVAP, CCL4, GLIPR2, PTK2, PTK2B, TEK, BCL6, BCAS3, LAMB1, THBS1, CSF1R, THBS4, FLT1, MYO1C, SWAP70,…	1879	313	13541	1.74982	0.00733638	0.000350578	0.00180003
GOTERM_BP_FAT	GO:0030335~positive regulation of cell migration	73	2.8131	9.32681e-07	F2RL1, GPLD1, AQP1, TGFB1, CXCL10, DAB2, SEMA7A, SEMA3F, CCBE1, PDGFD, FAM83H, FGF1, INSR, IL1A, ADAM9, CYR61, PRKCA, ICAM1, C5AR1, LYN, LEF1, PRKCE, DAPK2, VEGFC, SEMA4G, SEMA4F, ITGB1BP1, EPB41L5, PLA2G7, PDGFRA, HAS2, RELN, COL1A1, CCL3, IL1R1, CCL2, FGR, CSF1, CXCL2, CXCL9, KITLG, PLVAP, CCL4, GLIPR2, PTK2, PTK2B, TEK, BCAS3, LAMB1, THBS1, CSF1R, THBS4, FLT1, MYO1C, SWAP70, PODXL, TGFBR1, IGF…	1879	297	13541	1.77129	0.00760864	0.000347109	0.00186709
GOTERM_BP_FAT	GO:0006928~movement of cell or subcellular component	230	8.8632	1.33643e-06	TUBB2B, AQP1, PRKX, AGTR1, OGN, ATP2B4, S1PR1, CCSAP, FAP, SEMA7A, GAB1, CCBE1, ADAM9, S100A2, TYRO3, C5AR1, PTPRF, PDPN, KIF5C, EMX2, THY1, HES1, VEGFC, TACSTD2, CD34, CX3CR1, PDGFRA, EFNA5, BIN3, STC1, HAS2, MYO18A, IL1R1, ITGA11, DAG1, CACNB2, ASAP3, ADA, FUZ, LAMB1, GCNT1, PLTP, OSBPL8, TGFBR1, CCDC80, SMAD4, NCKAP1L, CELSR1, HGF, S100A14, EPHA1, GAS6, KDR, LAMA2, EPHA7, EPS8, SFRP2, TGFBR3, …	1879	1241	13541	1.33561	0.0108844	0.000437666	0.00267532
GOTERM_BP_FAT	GO:0040017~positive regulation of locomotion	76	2.92871	1.50569e-06	F2RL1, GPLD1, AQP1, TGFB1, CXCL10, DAB2, SEMA7A, SEMA3F, CCBE1, PDGFD, FAM83H, FGF1, INSR, IL1A, ADAM9, CYR61, PRKCA, ICAM1, STX3, C5AR1, LYN, LEF1, PRKCE, DAPK2, SLIT2, VEGFC, SEMA4G, SEMA4F, ITGB1BP1, EPB41L5, PLA2G7, PDGFRA, HAS2, RELN, COL1A1, MEGF8, CCL3, IL1R1, CCL2, FGR, CSF1, CXCL2, CXCL9, KITLG, PLVAP, CCL4, GLIPR2, PTK2, PTK2B, TEK, BCAS3, LAMB1, THBS1, CSF1R, THBS4, FLT1, MYO1C, SWAP70…	1879	317	13541	1.72774	0.0122544	0.000474123	0.00301415
GOTERM_BP_FAT	GO:0040012~regulation of locomotion	119	4.58574	1.84454e-06	PLXNA1, F2RL1, AQP1, TGFB1, KANK1, PRKX, MMRN2, CXCL10, DAB2, ROBO1, CCSAP, SEMA7A, CCBE1, GAB1, PDGFD, INSR, IL1A, ADAM9, C5AR1, THY1, VEGFC, TACSTD2, DLL4, PDGFRA, RIPK3, HAS2, RELN, STC1, COL1A1, EMP2, PLXNC1, CCL3, IL1R1, CCL2, FGR, DAG1, CCL4, ADA, TIMP1, FUZ, PTK2, TEK, LAMB1, CSF1R, CYP19A1, MYO1C, OSBPL8, TGFBR1, PODXL, NCKAP1L, HGF, DOCK5, EPHA1, S100A14, GAS6, KDR, DOCK4, LAMA2, SFRP2, …	1879	564	13541	1.52052	0.0149914	0.000520724	0.00369245
GOTERM_BP_FAT	GO:2000147~positive regulation of cell motility	73	2.8131	3.00109e-06	F2RL1, GPLD1, AQP1, TGFB1, CXCL10, DAB2, SEMA7A, SEMA3F, CCBE1, PDGFD, FAM83H, FGF1, INSR, IL1A, ADAM9, CYR61, PRKCA, ICAM1, C5AR1, LYN, LEF1, PRKCE, DAPK2, VEGFC, SEMA4G, SEMA4F, ITGB1BP1, EPB41L5, PLA2G7, PDGFRA, HAS2, RELN, COL1A1, CCL3, IL1R1, CCL2, FGR, CSF1, CXCL2, CXCL9, KITLG, PLVAP, CCL4, GLIPR2, PTK2, PTK2B, TEK, BCAS3, LAMB1, THBS1, CSF1R, THBS4, FLT1, MYO1C, SWAP70, PODXL, TGFBR1, IGF…	1879	306	13541	1.7192	0.0242764	0.000701924	0.0060076
Annotation Cluster 5	Enrichment Score: 6.382570981259021
Category	Term	Count	%	PValue	Genes	List Total	Pop Hits	Pop Total	Fold Enrichment	Bonferroni	Benjamini	FDR
GOTERM_BP_FAT	GO:0051056~regulation of small GTPase mediated signal transduction	56	2.158	6.24686e-09	F2RL2, ALS2, PREX1, F2RL1, PREX2, RASGEF1A, ITSN1, KANK1, MCF2L, ROBO1, TIAM1, ARHGEF2, ARHGEF5, SIPA1L2, ARHGEF16, SIPA1L3, FARP1, SLIT2, RALGAPA2, RALGAPA1, PLCE1, ARRB1, SIPA1L1, RELN, SPATA13, EPS8L2, EPS8L1, ARHGEF26, CYTH1, CSF1, CYTH4, KITLG, AKAP13, ARHGAP35, ABCA1, ARFGEF2, MCF2L2, PLEKHG2, PLEKHG6, RASGRP1, BCL6, RASA3, FGD5, ARHGEF10L, RASA2, FGD4, VAV3, ARHGEF37, DENND1A, IGF1, VAV2, …	1879	181	13541	2.22963	5.11542e-05	5.68393e-06	1.25054e-05
GOTERM_BP_FAT	GO:0007264~small GTPase mediated signal transduction	102	3.93064	6.48727e-09	CTNNAL1, F2RL2, ALS2, F2RL1, IQGAP3, RASGEF1B, RASGEF1A, ITSN1, KANK1, AGTR1, MFHAS1, ROBO1, TIAM1, ARL15, RAPGEF6, RAB23, RALB, RAPGEF5, RAB21, FARP1, RND3, PLCE1, ARRB1, COL1A2, RAB15, RELN, SPATA13, LRRK1, EPS8L2, EPS8L1, RAB7B, ARHGEF26, AKAP13, ABCA1, ARFGEF2, MCF2L2, DOCK1, RAC3, RHOBTB1, FGD5, CDC42EP3, ARHGEF10L, RHOBTB3, FGD4, VAV3, RASEF, ARHGEF37, DOCK9, DENND1A, CELSR1, DOCK5, VAV2, D…	1879	417	13541	1.76274	5.31228e-05	4.82946e-06	1.29866e-05
GOTERM_MF_FAT	GO:0005085~guanyl-nucleotide exchange factor activity	51	1.96532	9.76873e-08	ALS2, ARHGEF26, CYTH1, PREX1, PREX2, RASGEF1B, CYTH4, AKAP13, RASGEF1A, RCC1, ITSN1, ARFGEF2, DENND2D, MCF2L, MCF2L2, PLEKHG2, DOCK1, RASGRP3, TIAM1, RASGRP1, PLEKHG6, RAPGEF6, RAPGEF5, FGD5, ARHGEF10L, FGD4, SERGEF, ARHGEF2, VAV3, ARHGEF37, ARHGEF5, DOCK9, ARHGEF16, DENND1A, RIC8B, DOCK5, VAV2, DOCK6, FARP1, DOCK4, SH2D3C, PLCE1, FNBP1, GAPVD1, FNBP1L, RANGRF, SPATA13, EPS8L2, EPS8L1, BCAR3, RIN3	1728	176	12920	2.16659	0.000182561	0.000182561	0.000166627
GOTERM_BP_FAT	GO:0007265~Ras protein signal transduction	61	2.35067	5.67151e-07	CTNNAL1, F2RL2, RHOJ, ALS2, PREX1, F2RL1, PREX2, IQGAP3, RASGEF1A, ITSN1, KANK1, MCF2L, AGTR1, TIAM1, ROBO1, RALB, RHOG, ARHGEF2, ARHGEF5, ARHGEF16, RB1, FARP1, USP28, ARRB1, COL1A2, KSR1, SPATA13, EPS8L2, EPS8L1, ARHGEF26, CYTH1, CSF1, CYTH4, KITLG, AKAP13, ARHGAP35, ABCA1, ARFGEF2, MCF2L2, PLEKHG2, RASGRP3, PLEKHG6, RASGRP1, BCL6, RASA3, FGD5, CDC42EP3, ARHGEF10L, RASA2, FGD4, VAV3, ARHGEF37, D…	1879	230	13541	1.91129	0.00463363	0.000232193	0.00113535
GOTERM_BP_FAT	GO:0035023~regulation of Rho protein signal transduction	33	1.27168	1.24102e-06	F2RL2, ALS2, ARHGEF26, PREX1, PREX2, F2RL1, AKAP13, ARHGAP35, ABCA1, ITSN1, KANK1, MCF2L, MCF2L2, PLEKHG2, ROBO1, TIAM1, PLEKHG6, BCL6, FGD5, ARHGEF10L, FGD4, ARHGEF2, VAV3, ARHGEF37, ARHGEF5, ARHGEF16, VAV2, FARP1, ARRB1, SPATA13, EPS8L2, EPS8L1, F2R	1879	97	13541	2.45169	0.0101113	0.000423358	0.00248433
GOTERM_BP_FAT	GO:0046578~regulation of Ras protein signal transduction	46	1.77264	1.63337e-06	F2RL2, ALS2, ARHGEF26, CYTH1, CSF1, PREX1, PREX2, F2RL1, CYTH4, RASGEF1A, KITLG, AKAP13, ARHGAP35, ABCA1, ITSN1, ARFGEF2, MCF2L, KANK1, MCF2L2, PLEKHG2, TIAM1, ROBO1, RASGRP1, PLEKHG6, BCL6, FGD5, RASA3, ARHGEF10L, RASA2, FGD4, ARHGEF2, VAV3, ARHGEF37, ARHGEF5, ARHGEF16, DENND1A, IGF1, VAV2, FARP1, NOTCH2, PLCE1, ARRB1, SPATA13, EPS8L2, EPS8L1, F2R	1879	160	13541	2.07187	0.0132866	0.000477589	0.00326974
GOTERM_MF_FAT	GO:0005088~Ras guanyl-nucleotide exchange factor activity	33	1.27168	1.11593e-05	ALS2, ARHGEF26, PREX1, PREX2, RASGEF1B, RASGEF1A, AKAP13, DENND2D, ITSN1, RCC1, MCF2L, MCF2L2, PLEKHG2, RASGRP3, TIAM1, PLEKHG6, RASGRP1, FGD5, ARHGEF10L, FGD4, ARHGEF2, VAV3, ARHGEF37, ARHGEF5, DENND1A, ARHGEF16, VAV2, FARP1, RANGRF, SPATA13, EPS8L2, EPS8L1, RIN3	1728	110	12920	2.24306	0.0206409	0.00231475	0.019033
GOTERM_MF_FAT	GO:0005089~Rho guanyl-nucleotide exchange factor activity	24	0.924855	1.71265e-05	ALS2, ARHGEF2, VAV3, ARHGEF26, PREX1, ARHGEF37, PREX2, ARHGEF5, ARHGEF16, AKAP13, VAV2, ITSN1, FARP1, MCF2L, MCF2L2, PLEKHG2, TIAM1, PLEKHG6, FGD5, SPATA13, EPS8L2, EPS8L1, ARHGEF10L, FGD4	1728	69	12920	2.60064	0.0315028	0.00319585	0.0292089
Annotation Cluster 6	Enrichment Score: 5.484309776627973
Category	Term	Count	%	PValue	Genes	List Total	Pop Hits	Pop Total	Fold Enrichment	Bonferroni	Benjamini	FDR
GOTERM_MF_FAT	GO:0043167~ion binding	496	19.1137	1.67576e-06	PDP1, LTBP1, PTGS2, TMPPE, ITSN1, FAH, HMCN1, BRPF3, PLS1, ZNF394, PLS3, LIG3, F9, COLEC12, PITPNM1, ADAMTS9, PITPNM2, NAPEPLD, ZNF783, ADAMTS1, ADAMTS3, UNC13B, HACL1, PPP2R3A, CYP51A1, GNAI1, ACP5, ATP12A, LPCAT1, ZC3H13, ZNF623, MGAT4A, PTGR1, PTGR2, RASEF, TGFBR1, ATP11B, KLF16, PCDH12, ATP11A, PRPSAP1, PCDH17, GAS6, PRPSAP2, BFAR, CYP17A1, CDC42BPG, PAPPA2, CYP2R1, TLL2, ZNF219, CSH2, RNF185…	1728	3115	12920	1.19054	0.00312709	0.000626203	0.00285833
GOTERM_MF_FAT	GO:0046872~metal ion binding	471	18.1503	3.92428e-06	PDP1, LTBP1, PTGS2, TMPPE, ITSN1, FAH, HMCN1, BRPF3, PLS1, ZNF394, PLS3, LIG3, F9, COLEC12, PITPNM1, ADAMTS9, PITPNM2, NAPEPLD, ZNF783, ADAMTS1, ADAMTS3, UNC13B, HACL1, PPP2R3A, CYP51A1, GNAI1, ACP5, ATP12A, LPCAT1, ZNF623, ZC3H13, MGAT4A, PTGR1, PTGR2, RASEF, TGFBR1, ATP11B, KLF16, ATP11A, PCDH12, PRPSAP1, PCDH17, GAS6, PRPSAP2, BFAR, CYP17A1, CDC42BPG, PAPPA2, CYP2R1, TLL2, ZNF219, CSH2, RNF185…	1728	2961	12920	1.18933	0.00730767	0.00122167	0.00669352
GOTERM_MF_FAT	GO:0043169~cation binding	474	18.2659	5.35919e-06	PDP1, LTBP1, PTGS2, TMPPE, ITSN1, FAH, HMCN1, BRPF3, PLS1, ZNF394, PLS3, LIG3, F9, COLEC12, PITPNM1, ADAMTS9, PITPNM2, NAPEPLD, ZNF783, ADAMTS1, ADAMTS3, UNC13B, HACL1, PPP2R3A, CYP51A1, GNAI1, ACP5, ATP12A, LPCAT1, ZNF623, ZC3H13, MGAT4A, PTGR1, PTGR2, RASEF, TGFBR1, ATP11B, KLF16, ATP11A, PCDH12, PRPSAP1, PCDH17, GAS6, PRPSAP2, BFAR, CYP17A1, CDC42BPG, PAPPA2, CYP2R1, TLL2, ZNF219, CSH2, RNF185…	1728	2990	12920	1.18529	0.00996635	0.00142988	0.00914088
Annotation Cluster 7	Enrichment Score: 5.373744768693598
Category	Term	Count	%	PValue	Genes	List Total	Pop Hits	Pop Total	Fold Enrichment	Bonferroni	Benjamini	FDR
GOTERM_BP_FAT	GO:0044093~positive regulation of molecular function	199	7.66859	1.88093e-08	ATP1B3, MED25, LPAR3, B2M, MAGED1, AGTR1, BAK1, AGTR2, ATP2B4, GAB1, ADAM9, WNT10B, TNIK, PPARGC1A, PLAUR, THY1, HES1, GAPVD1, F3, ACAP1, PDGFRA, CAMK1, EIF2AK2, CRTC3, ACE, ARHGEF10L, HIP1, OSBPL8, ACER2, TGFBR1, SRA1, S100A10, PIBF1, CDC20B, HGF, EPHA1, GAS6, RGS5, PPRC1, PON1, RGS7, CCNT2, SLC27A1, PPARG, GPLD1, SMAP2, FXN, NOS2, FGF1, CYR61, ARHGEF2, AR, LYN, ARHGEF5, ARHGEF16, CFTR, NFAM1, C…	1879	989	13541	1.45004	0.000154018	1.18484e-05	3.76537e-05
GOTERM_BP_FAT	GO:0043085~positive regulation of catalytic activity	149	5.74181	1.01839e-05	CASR, ATP1B3, ZAK, RASGEF1B, IQGAP3, LPAR3, TLR6, TGFB1, CRADD, MAGED1, TBC1D16, AGTR1, BAK1, AGTR2, ATP2B4, TIAM1, ROBO1, GAB1, RALB, PDGFD, INSR, ADAM9, TNIK, FGF23, GRHL3, GRHL2, TBC1D22A, THY1, TNNT2, RALGAPA2, RALGAPA1, PLCE1, GAPVD1, RFK, ARRB1, F3, ACAP1, RIPK3, PDGFRA, CAMK1, RELN, EIF2AK2, EMP2, ABCA7, CAV1, CCL3, CCL2, FGR, CCL8, CCL4, LLGL1, EPM2AIP1, VDR, ACE, PTK2, TEK, NKX3-1, SCARB…	1879	766	13541	1.40179	0.0800134	0.00170052	0.0203848
GOTERM_BP_FAT	GO:0032270~positive regulation of cellular protein metabolic process	178	6.85934	0.000394893	PTGS2, ZAK, IL18, F2RL1, IQGAP3, TLR3, LPAR3, TLR6, TGFB1, CRADD, MAGED1, AGTR1, BAK1, AGTR2, DAB2, ATP2B4, CD44, ROBO1, SEMA7A, GAB1, CCBE1, RALB, IL1B, PDGFD, DNAJC3, INSR, IL1A, ADAM9, F12, TNIK, C5AR1, TADA2A, FMR1, MTA1, FGF23, STK4, STK3, PLAUR, HES1, VEGFC, PLCE1, CD36, ARRB1, PIAS3, F3, RIPK3, PDGFRA, CAMK1, EFNA5, RELN, PAF1, TNFAIP3, EIF2AK2, EMP2, LRRK1, MAVS, ABCA7, CAV1, CCL3, CCL2, …	1879	1010	13541	1.27006	0.960617	0.0245732	0.787561
Annotation Cluster 8	Enrichment Score: 4.978184458520097
Category	Term	Count	%	PValue	Genes	List Total	Pop Hits	Pop Total	Fold Enrichment	Bonferroni	Benjamini	FDR
GOTERM_BP_FAT	GO:0001525~angiogenesis	72	2.77457	3.62034e-06	NRP2, IL18, TBX20, GPLD1, SPI1, ENPEP, AQP1, FOXO4, GJA5, PRKX, MMRN2, BAK1, S1PR1, HPSE, ROBO1, ANG, FAP, CCBE1, TGFBI, ROBO4, TIE1, FGF1, ANGPT2, IL1A, CYR61, PRKCA, RAMP2, C5AR1, LEF1, STK4, PNPLA6, SLIT2, THY1, PRKCB, VEGFC, ADM, GTF2I, CD34, ITGB1BP1, DLL4, F3, CX3CR1, HIPK2, PDGFRA, CAV1, CCL2, ESM1, STARD13, PPP1R16B, PTK2, OVOL2, PTK2B, TEK, PLCD1, THBS1, C1GALT1, THBS4, PTPRB, FLT1, EPAS…	1879	302	13541	1.7181	0.0292118	0.00077988	0.00724718
GOTERM_BP_FAT	GO:0001944~vasculature development	102	3.93064	3.66421e-06	LTBP1, IL18, JAG1, ENPEP, AQP1, FOXO4, CITED1, PRKX, MMRN2, WNT2, BAK1, SHB, S1PR1, ROBO1, FAP, CCBE1, TGFBI, ROBO4, LOX, IL1A, FLVCR1, C5AR1, PDPN, STK4, PNPLA6, THY1, HES1, VEGFC, CD34, DLL4, F3, CX3CR1, SIX1, COL1A2, PDGFRA, HAS2, COL1A1, MAPK7, EMP2, CAV1, CCL2, ESM1, PTK2, PPP1R16B, OVOL2, TEK, NKX3-1, CCM2, EPAS1, TGFBR1, SMAD6, CCDC80, MCAM, EPHA1, KDR, SFRP2, ANTXR1, NRP2, RHOJ, TBX20, SP…	1879	472	13541	1.55734	0.0295606	0.000769096	0.007335
GOTERM_BP_FAT	GO:0001568~blood vessel development	96	3.69942	5.874e-06	NRP2, LTBP1, IL18, TBX20, SPI1, GPLD1, JAG1, ENPEP, AQP1, FOXO4, GJA5, CITED1, PRKX, MMRN2, WNT2, BAK1, SHB, S1PR1, GPC3, HPSE, ROBO1, ANG, FAP, CCBE1, TGFBI, ROBO4, LOX, TIE1, FGF1, ANGPT2, IL1A, CYR61, FLVCR1, PRKCA, RAMP2, C5AR1, LEF1, STK4, PNPLA6, SLIT2, THY1, PRKCB, HES1, VEGFC, ADM, GTF2I, CD34, ITGB1BP1, DLL4, F3, CX3CR1, HIPK2, SIX1, COL1A2, PDGFRA, MDM2, HAS2, COL1A1, MEGF8, CAV1, CCL2,…	1879	442	13541	1.56521	0.0469637	0.00114464	0.0117583
GOTERM_BP_FAT	GO:0072358~cardiovascular system development	140	5.39499	1.09693e-05	LTBP1, IL18, JAG1, ENPEP, AQP1, FOXO4, TGFB1, PRKX, CITED1, MMRN2, WNT2, SHB, BAK1, SIN3B, PSKH1, S1PR1, ROBO1, FAP, CCBE1, TGFBI, GAB1, ROBO4, LOX, INSR, IL1A, FLVCR1, C5AR1, PDPN, MED12, STK4, GRHL2, PNPLA6, STK3, THY1, TNNT2, HES1, VEGFC, MSX1, CD34, F3, DLL4, CX3CR1, SIX1, COL1A2, PDGFRA, DSP, HAS2, ADAMTS1, MAPK7, COL1A1, EMP2, CAV1, CCL2, ESM1, BICC1, PPP1R16B, PTK2, OVOL2, TEK, GYS1, NKX3-…	1879	712	13541	1.41701	0.0859117	0.00179495	0.0219568
GOTERM_BP_FAT	GO:0072359~circulatory system development	140	5.39499	1.09693e-05	LTBP1, IL18, JAG1, ENPEP, AQP1, FOXO4, TGFB1, PRKX, CITED1, MMRN2, WNT2, SHB, BAK1, SIN3B, PSKH1, S1PR1, ROBO1, FAP, CCBE1, TGFBI, GAB1, ROBO4, LOX, INSR, IL1A, FLVCR1, C5AR1, PDPN, MED12, STK4, GRHL2, PNPLA6, STK3, THY1, TNNT2, HES1, VEGFC, MSX1, CD34, F3, DLL4, CX3CR1, SIX1, COL1A2, PDGFRA, DSP, HAS2, ADAMTS1, MAPK7, COL1A1, EMP2, CAV1, CCL2, ESM1, BICC1, PPP1R16B, PTK2, OVOL2, TEK, GYS1, NKX3-…	1879	712	13541	1.41701	0.0859117	0.00179495	0.0219568
GOTERM_BP_FAT	GO:0048514~blood vessel morphogenesis	81	3.12139	3.10111e-05	NRP2, IL18, TBX20, GPLD1, SPI1, JAG1, ENPEP, AQP1, FOXO4, GJA5, CITED1, PRKX, MMRN2, BAK1, SHB, S1PR1, HPSE, ROBO1, ANG, FAP, CCBE1, TGFBI, ROBO4, TIE1, FGF1, ANGPT2, IL1A, CYR61, PRKCA, RAMP2, C5AR1, LEF1, STK4, PNPLA6, SLIT2, THY1, PRKCB, HES1, VEGFC, ADM, GTF2I, CD34, ITGB1BP1, DLL4, F3, CX3CR1, HIPK2, SIX1, PDGFRA, HAS2, CAV1, CCL2, ESM1, STARD13, ZFP36L1, PPP1R16B, PTK2, OVOL2, PTK2B, TEK, P…	1879	372	13541	1.56916	0.224272	0.00422362	0.0620617
GOTERM_BP_FAT	GO:0048646~anatomical structure formation involved in morphogenesis	168	6.47399	4.88844e-05	IL18, FAM20C, ENPEP, CD53, AQP1, FOXO4, PRKX, MTHFD1L, MMRN2, CXCL10, WNT2, BAK1, S1PR1, ROBO1, ATXN10, FAP, CCBE1, TGFBI, ROBO4, RAB23, COL12A1, IL1A, ADAM9, WNT10B, C5AR1, RARG, PDPN, CEP89, MYLK3, TANC1, MED12, GRHL3, GRHL2, STK4, PNPLA6, STK3, THY1, HES1, VEGFC, KRT19, UNC13D, MSX1, CD34, FNBP1L, F3, DLL4, CX3CR1, SIX1, PDGFRA, CAMK1, RELN, ADAMTS1, PAF1, COL1A1, INTU, SLC40A1, IQCB1, CAV1, C…	1879	908	13541	1.33336	0.329897	0.00586982	0.0978144
Annotation Cluster 9	Enrichment Score: 4.807821496221213
Category	Term	Count	%	PValue	Genes	List Total	Pop Hits	Pop Total	Fold Enrichment	Bonferroni	Benjamini	FDR
GOTERM_BP_FAT	GO:0009966~regulation of signal transduction	358	13.7958	6.16029e-10	ALS2, FAM20C, LPAR3, SGMS1, ITSN1, MAGED1, BAK1, AGTR2, ATP2B4, CD44, SOSTDC1, SEMA7A, CCBE1, GAB1, ADAM9, TYRO3, WNT10B, C5AR1, TNIK, MED12, SIPA1L2, SIPA1L3, UBR2, OPTN, RIC8B, FARP1, THY1, PLAUR, BCL2L10, HES1, CD36, MSX1, ATP2C1, SIPA1L1, F3, CX3CR1, PDGFRA, MAPK7, EIF2AK2, ADAMTS3, EPS8L2, CD226, EPS8L1, FBXL2, CRTC3, IL1R1, ARHGEF26, GNAI1, DAG1, AKAP12, AKAP13, ESM1, ARFGEF2, ADA, MCF2L2, …	1879	1933	13541	1.33467	5.04465e-06	2.52233e-06	1.23321e-06
GOTERM_BP_FAT	GO:0023051~regulation of signaling	389	14.9904	1.02044e-09	ALS2, SGMS1, ITSN1, MAGED1, AGTR2, ADAM9, TYRO3, WNT10B, TNIK, SIPA1L2, MED12, SIPA1L3, THY1, PLAUR, BCL2L10, MSX1, F3, SIPA1L1, MAPK7, EIF2AK2, ADAMTS3, CD226, UNC13B, CRTC3, IL1R1, ARHGEF26, GNAI1, ESM1, ARFGEF2, MCF2L2, PEA15, ARHGEF10L, WDR59, ARHGEF37, TGFBR1, PIBF1, HGF, PCDH17, GAS6, ACPP, SHOX2, BFAR, RGS1, RGS5, RGS7, SMURF1, GPLD1, SRPX, PIK3AP1, FGF1, PGAP2, AR, ARHGEF2, STX3, LYN, ARH…	1879	2141	13541	1.30935	8.35637e-06	2.78546e-06	2.04279e-06
GOTERM_BP_FAT	GO:0010646~regulation of cell communication	383	14.7592	2.78606e-09	ALS2, FAM20C, LPAR3, SYT9, SGMS1, SIDT2, ITSN1, MAGED1, BAK1, AGTR2, ATP2B4, CD44, SOSTDC1, SEMA7A, CCBE1, GAB1, ADAM9, TYRO3, WNT10B, C5AR1, TNIK, MED12, SIPA1L2, SIPA1L3, UBR2, OPTN, RIC8B, FARP1, THY1, PLAUR, BCL2L10, HES1, CD36, MSX1, ATP2C1, SIPA1L1, F3, CX3CR1, PDGFRA, EFNA5, MAPK7, EIF2AK2, ADAMTS3, EPS8L2, CD226, UNC13B, EPS8L1, FBXL2, CRTC3, RBP4, IL1R1, ARHGEF26, GNAI1, DAG1, AKAP12, AK…	1879	2118	13541	1.30316	2.28148e-05	4.56299e-06	5.57731e-06
GOTERM_BP_FAT	GO:0048585~negative regulation of response to stimulus	173	6.66667	0.000789811	LGMN, F2RL1, ZNF451, CASK, SGMS1, TGFB1, IL10, KANK1, MMRN2, KANK2, NLRC5, DAB2, AGTR2, ATP2B4, CD44, ROBO1, SOSTDC1, SPRED1, DNAJC3, TYRO3, F12, CHAC1, MED12, SOCS6, UBR2, SERPING1, OPTN, STK4, STK3, BCL2L10, PLAUR, THY1, TNFAIP6, THBD, CD34, ARRB1, DLL4, CX3CR1, PDGFRA, MAPK7, TNFAIP3, CRTC3, CAV1, RAB7B, CCL2, GCLC, DAG1, ACP5, BICC1, SESN2, PAQR3, ADA, SESN3, PEA15, OTUD7B, NKX3-1, RNF169, CY…	1879	992	13541	1.25678	0.998451	0.038685	1.56928
GOTERM_BP_FAT	GO:0023057~negative regulation of signaling	147	5.66474	0.0016685	LGMN, F2RL1, ZNF451, SGMS1, KANK1, MMRN2, KANK2, NLRC5, AGTR2, DAB2, ATP2B4, CD44, ROBO1, SOSTDC1, SPRED1, TYRO3, CHAC1, MED12, SOCS6, UBR2, OPTN, STK4, IRS1, STK3, BCL2L10, PLAUR, THY1, ARRB1, DLL4, CX3CR1, MAPK7, TNFAIP3, MVP, CRTC3, CAV1, RAB7B, GCLC, DAG1, BICC1, SESN2, PAQR3, ADA, SESN3, PEA15, OTUD7B, NKX3-1, SREBF1, CFLAR, TBC1D10C, RFX4, TGFBR1, SMAD6, RPGRIP1L, NR4A2, ITGA1, CIDEA, PIBF1…	1879	839	13541	1.26264	0.999999	0.0664095	3.28765
GOTERM_BP_FAT	GO:0010648~negative regulation of cell communication	146	5.6262	0.00199076	LGMN, F2RL1, ZNF451, SGMS1, KANK1, MMRN2, KANK2, NLRC5, AGTR2, DAB2, ATP2B4, CD44, ROBO1, SOSTDC1, SPRED1, TYRO3, CHAC1, MED12, SOCS6, UBR2, OPTN, STK4, IRS1, STK3, BCL2L10, PLAUR, THY1, ARRB1, DLL4, CX3CR1, MAPK7, TNFAIP3, CRTC3, CAV1, RAB7B, GCLC, DAG1, BICC1, SESN2, PAQR3, ADA, SESN3, PEA15, OTUD7B, NKX3-1, SREBF1, CFLAR, TBC1D10C, RFX4, TGFBR1, SMAD6, RPGRIP1L, NR4A2, ITGA1, CIDEA, PIBF1, HGF…	1879	836	13541	1.25855	1	0.075109	3.91069
GOTERM_BP_FAT	GO:0009968~negative regulation of signal transduction	138	5.31792	0.00215355	LGMN, F2RL1, ZNF451, SGMS1, KANK1, MMRN2, KANK2, NLRC5, AGTR2, DAB2, ATP2B4, CD44, ROBO1, SOSTDC1, SPRED1, TYRO3, CHAC1, MED12, SOCS6, UBR2, OPTN, STK4, STK3, BCL2L10, PLAUR, THY1, ARRB1, DLL4, CX3CR1, MAPK7, TNFAIP3, CRTC3, CAV1, RAB7B, GCLC, DAG1, BICC1, SESN2, PAQR3, ADA, SESN3, PEA15, OTUD7B, NKX3-1, CFLAR, TBC1D10C, RFX4, TGFBR1, SMAD6, RPGRIP1L, NR4A2, ITGA1, CIDEA, PIBF1, HGF, GAS6, NFKBIL…	1879	786	13541	1.26526	1	0.0784825	4.22396
GOTERM_BP_FAT	GO:1902532~negative regulation of intracellular signal transduction	53	2.04239	0.348357	F2RL1, WWC2, KANK1, ATP2B4, CD44, SPRED1, PRL, PGAP2, LYN, SLA2, SOCS6, UBR2, OPTN, NLRP3, LMBRD1, SLIT2, PLAUR, BCL2L10, ITGB1BP1, MDM2, MAPK7, TNFAIP3, CRTC3, CAV1, DAG1, NLRX1, ARHGAP35, SESN2, IVNS1ABP, PAQR3, SESN3, MIF, EZR, INPP5K, OTUD7B, BCL6, RASA3, THBS1, RASA2, GBA, TBC1D10C, PIBF1, PARK2, SNAI2, ITPR1, GPS2, PPIF, HYOU1, TXNDC12, CBLC, TSC1, SFRP2, PTTG1IP	1879	354	13541	1.07894	1	0.959706	99.9811
Annotation Cluster 10	Enrichment Score: 4.36030647827397
Category	Term	Count	%	PValue	Genes	List Total	Pop Hits	Pop Total	Fold Enrichment	Bonferroni	Benjamini	FDR
GOTERM_BP_FAT	GO:0031589~cell-substrate adhesion	61	2.35067	1.2335e-06	LYPD3, PREX1, CASK, BCAM, KANK1, PRKX, HPSE, TIAM1, ZYX, ANGPT2, ADAM9, CYR61, TYRO3, LDB1, CDK6, PRKCE, THY1, VEGFC, UNC13D, TACSTD2, CD34, ITGB1BP1, EPB41L5, EFNA5, COL1A1, EMP2, SPOCK2, CSF1, ITGB4, ITGA11, NINJ1, ITGB5, CCL28, SMOC2, PTK2, PTK2B, RAC3, TEK, BCL6, LAMB1, BCAS3, THBS1, TNXB, SMAD6, ACER2, CCDC80, ITGA1, ITGA2, S100A10, FZD4, EPHA1, GAS6, KDR, ITGA6, TSC1, SNED1, FREM1, PECAM1, …	1879	235	13541	1.87062	0.0100503	0.000439082	0.00246926
GOTERM_BP_FAT	GO:0007160~cell-matrix adhesion	40	1.54143	6.96438e-06	LYPD3, CSF1, ITGA11, ITGB4, CASK, NINJ1, ITGB5, BCAM, CCL28, PTK2, HPSE, TIAM1, PTK2B, TEK, BCL6, ZYX, THBS1, BCAS3, ADAM9, TNXB, ACER2, LDB1, ITGA1, S100A10, ITGA2, CDK6, EPHA1, THY1, KDR, VEGFC, ITGA6, TSC1, SNED1, CD34, ITGB1BP1, FREM1, PECAM1, EPB41L5, EFNA5, EMP2	1879	138	13541	2.08884	0.0554357	0.00126656	0.0139408
GOTERM_BP_FAT	GO:0010810~regulation of cell-substrate adhesion	36	1.38728	7.27488e-05	SPOCK2, CSF1, PREX1, CASK, NINJ1, CCL28, KANK1, SMOC2, PTK2, PTK2B, RAC3, TEK, BCL6, THBS1, BCAS3, ANGPT2, CYR61, ACER2, LDB1, CCDC80, S100A10, CDK6, PRKCE, EPHA1, FZD4, KDR, VEGFC, UNC13D, TSC1, TACSTD2, ITGB1BP1, EPB41L5, EFNA5, JAK2, COL1A1, EMP2	1879	131	13541	1.98041	0.448857	0.00847477	0.145533
GOTERM_BP_FAT	GO:0001954~positive regulation of cell-matrix adhesion	14	0.539499	8.02617e-05	CSF1, S100A10, NINJ1, CDK6, CCL28, EPHA1, KDR, VEGFC, TSC1, PTK2B, ITGB1BP1, EPB41L5, TEK, EMP2	1879	30	13541	3.36303	0.481746	0.00921488	0.16055
GOTERM_BP_FAT	GO:0001952~regulation of cell-matrix adhesion	22	0.847784	0.000363516	LDB1, CSF1, ACER2, S100A10, CASK, NINJ1, CDK6, EPHA1, CCL28, KDR, VEGFC, PTK2, TSC1, PTK2B, ITGB1BP1, EPB41L5, TEK, EFNA5, BCL6, THBS1, BCAS3, EMP2	1879	70	13541	2.2649	0.949074	0.0241093	0.725201
GOTERM_BP_FAT	GO:0010811~positive regulation of cell-substrate adhesion	23	0.88632	0.000377818	SPOCK2, CSF1, PREX1, CCDC80, NINJ1, S100A10, CDK6, PRKCE, EPHA1, CCL28, KDR, VEGFC, SMOC2, UNC13D, TSC1, RAC3, PTK2B, ITGB1BP1, EPB41L5, TEK, JAK2, EMP2, CYR61	1879	75	13541	2.20999	0.954704	0.0244524	0.753629
Annotation Cluster 11	Enrichment Score: 4.102911723140026
Category	Term	Count	%	PValue	Genes	List Total	Pop Hits	Pop Total	Fold Enrichment	Bonferroni	Benjamini	FDR
GOTERM_BP_FAT	GO:0005975~carbohydrate metabolic process	114	4.39306	4.8463e-05	GNPDA1, GBGT1, B3GALT5, TGFB1, ST3GAL1, GLT8D1, ST3GAL4, ST3GAL6, B3GALNT2, INSR, GGTA1, IDUA, FUT10, MLXIPL, MOGS, IRS1, MGAT3, HAS2, PHKA2, RBP4, GCNT3, ALDOC, NAGK, SESN2, EPM2AIP1, GALM, ISYNA1, PPP1R3F, NAGA, B3GNT6, GYS1, IDH2, IDH1, B3GNT3, B4GALT6, GCNT1, B4GALT5, MGAT4A, B4GALT3, DHDDS, ACER2, NPL, PCDH12, BPGM, GBE1, ISPD, ST8SIA5, FUK, GK, FABP5, PC, PPARA, GM2A, ALG2, GPLD1, ALG5, DPY…	1879	573	13541	1.43375	0.32758	0.00590597	0.0969716
GOTERM_BP_FAT	GO:0044262~cellular carbohydrate metabolic process	46	1.77264	8.9986e-05	PHKA2, INPP1, PPARA, SORD, GPLD1, HK1, SESN2, NAGK, GCGR, EPM2AIP1, GLB1, GALK1, ISYNA1, GNPTAB, INPP5K, PTK2B, AOAH, SLC35B4, PPP1R3F, IDH2, GYS1, IDH1, B3GNT3, INSR, INPP5A, PHLDA2, ENOSF1, PDK1, KAT2A, MOGAT1, PLEK, PCDH12, IGF1, BPGM, PARK2, PRKCE, IRS1, GBE1, PYGL, GAA, HAS2, NLN, FUK, GK, IGFBP3	1879	185	13541	1.79188	0.521418	0.00952485	0.179986
GOTERM_BP_FAT	GO:0044723~single-organism carbohydrate metabolic process	94	3.62235	0.000112637	PPARA, GM2A, B3GALT5, ALG2, GPLD1, ALG5, DPY19L3, TGFB1, ST3GAL1, GLT8D1, ST3GAL4, CHST12, POMT1, AOAH, CHST11, ST3GAL6, B3GALNT2, INSR, GGTA1, MAN1A2, INPPL1, FUT10, MLXIPL, MOGS, IRS1, ST6GALNAC2, PMM1, MGAT3, H6PD, GAA, HAS2, GALNT3, INPP1, PHKA2, RBP4, GCNT3, SORD, TNF, FUT8, GALNT6, ALDOC, GALNT4, HK2, HK1, EDEM2, SESN2, GCGR, EPM2AIP1, GALK1, ISYNA1, GALM, GALNT10, INPP5K, GNPTAB, PTK2B, SL…	1879	463	13541	1.46309	0.60245	0.0114642	0.225242
Annotation Cluster 12	Enrichment Score: 4.009833203832997
Category	Term	Count	%	PValue	Genes	List Total	Pop Hits	Pop Total	Fold Enrichment	Bonferroni	Benjamini	FDR
GOTERM_BP_FAT	GO:0010033~response to organic substance	297	11.4451	1.88734e-06	ALAD, PTGS2, FAM20C, AQP1, SIDT2, CITED1, B2M, BAK1, AGTR1, AGTR2, ATP2B4, CD44, SOSTDC1, CCBE1, GAB1, CREB3L4, CHRNA1, ADAM9, F12, WNT10B, C5AR1, RARG, MYLK3, MED12, COLEC12, UBR2, HES1, CD36, MSX1, KRT18, CCR5, F3, CX3CR1, PDGFRA, EFNA5, HAS2, MAPK7, EIF2AK2, ADAMTS3, IBSP, RBP4, IL1R1, RBP1, GNAI1, ACP5, CD68, SPP1, DNMT3A, OSBPL8, SMAD6, ACER2, TGFBR1, OSBPL7, FBXO2, SMAD4, CIDEA, SMAD1, HGF,…	1879	1677	13541	1.27628	0.0153366	0.000515049	0.00377814
GOTERM_BP_FAT	GO:0071310~cellular response to organic substance	244	9.4027	2.25928e-06	ALAD, PTGS2, FAM20C, AQP1, CITED1, B2M, BAK1, AGTR1, AGTR2, ATP2B4, CD44, SOSTDC1, GAB1, CCBE1, CREB3L4, ADAM9, WNT10B, RARG, MYLK3, MED12, UBR2, COLEC12, HES1, CD36, MSX1, KRT18, CCR5, F3, CX3CR1, PDGFRA, EFNA5, HAS2, MAPK7, EIF2AK2, ADAMTS3, IBSP, IL1R1, GNAI1, CD68, DNMT3A, OSBPL8, SMAD6, TGFBR1, OSBPL7, SMAD4, CIDEA, SMAD1, HGF, GAS6, KDR, BFAR, RNF6, SFRP2, TGFBR3, SMURF1, SLC27A1, PPARG, GP…	1879	1339	13541	1.31321	0.0183312	0.000577998	0.00452268
GOTERM_BP_FAT	GO:0070887~cellular response to chemical stimulus	293	11.2909	3.19535e-06	ALAD, PTGS2, FAM20C, AQP1, CITED1, B2M, BAK1, AGTR1, AGTR2, S1PR1, ATP2B4, CD44, SOSTDC1, CCBE1, GAB1, CREB3L4, ADAM9, WNT10B, C5AR1, RARG, MYLK3, MED12, COLEC12, UBR2, PPARGC1A, HES1, VEGFC, CD36, MSX1, KRT18, CCR5, CD34, SULT1B1, F3, CX3CR1, PDGFRA, EFNA5, HAS2, MAPK7, EIF2AK2, ADAMTS3, IBSP, IL1R1, GNAI1, CD68, DNMT3A, OSBPL8, SMAD6, ACER2, TGFBR1, OSBPL7, SMAD4, NCKAP1L, CIDEA, SMAD1, HGF, S1…	1879	1661	13541	1.27122	0.0258274	0.000726591	0.00639647
GOTERM_BP_FAT	GO:0009719~response to endogenous stimulus	156	6.01156	0.000477737	ZNF451, FGF10, JAG1, AQP1, FOXO4, TGFB1, IL10, KANK1, CITED1, KANK2, WNT2, AGTR1, EIF4EBP1, DAB2, ATP2B4, CD44, SOSTDC1, PDGFD, CHRNA1, ADAM9, WNT10B, C5AR1, SLC33A1, MED12, FGF23, UBR2, IRS1, HES1, CD36, MSX1, DLL4, COL1A2, PDGFRA, HAS2, EFNA5, MAPK7, COL1A1, TNFAIP3, CAV1, CCL2, GCLC, SOX5, ITGB5, ABCA1, TIMP2, SESN2, TRIM71, TIMP1, NR2C1, SESN3, EPM2AIP1, VDR, SLX4, PTK2, NKX3-1, SREBF1, DNMT3…	1879	872	13541	1.28923	0.980022	0.027181	0.952033
GOTERM_BP_FAT	GO:1901700~response to oxygen-containing compound	143	5.5106	0.000503728	IL18, TLR2, JAG1, AQP1, SIDT2, FOXO4, TGFB1, IL10, KANK1, CITED1, KANK2, B2M, CXCL10, AGTR1, EIF4EBP1, SLC2A5, ATP2B4, PDGFD, ADAM9, WNT10B, C5AR1, RARG, MLXIPL, UBR2, IRS1, CD36, CCR5, ARRB1, COL1A2, PDGFRA, EFNA5, PAF1, MAPK7, COL1A1, TNFAIP3, RBP4, CCL3, CAV1, CCL2, GNAI1, ACP5, ABCA1, SESN2, SESN3, EPM2AIP1, VDR, PTK2, NKX3-1, SCARB1, SPP1, SREBF1, LPL, DNMT3A, OSBPL8, ACER2, TGFBR1, OSBPL7, …	1879	790	13541	1.30447	0.983854	0.0282467	1.00358
GOTERM_BP_FAT	GO:0071495~cellular response to endogenous stimulus	128	4.93256	0.00463165	ZNF451, FGF10, AQP1, FOXO4, TGFB1, KANK1, CITED1, KANK2, WNT2, AGTR1, EIF4EBP1, DAB2, ATP2B4, CD44, SOSTDC1, PDGFD, ADAM9, WNT10B, SLC33A1, MED12, FGF23, UBR2, IRS1, HES1, MSX1, CD36, DLL4, COL1A2, PDGFRA, HAS2, EFNA5, MAPK7, COL1A1, CAV1, CCL2, SOX5, ITGB5, SESN2, TRIM71, SESN3, NR2C1, SLX4, VDR, PTK2, NKX3-1, SREBF1, DNMT3A, OSBPL8, SMAD6, TGFBR1, NR4A2, SMAD4, CIDEA, SMAD1, CDKN1C, P2RX4, RNF6…	1879	737	13541	1.2516	1	0.132251	8.8747
GOTERM_BP_FAT	GO:1901701~cellular response to oxygen-containing compound	96	3.69942	0.00561963	SLC5A5, IL18, PPARG, TLR2, GPLD1, AQP1, FOXO4, TGFB1, IL10, KANK1, KANK2, B2M, CXCL10, AGTR1, EIF4EBP1, SLC2A5, ATP2B4, FXN, NOS2, PDGFD, ADAM9, PRKCA, ICAM1, ARHGEF2, WNT10B, RARG, PTGER4, LYN, CYP11A1, LY96, MLXIPL, UBR2, CFTR, NLRP3, PRKCE, LMBRD1, IRS1, SLIT2, PRKCB, CD86, RAB11FIP2, CCR5, CD80, ARRB1, COL1A2, PDGFRA, EFNA5, COL1A1, PAF1, MAPK7, TNFAIP3, CCL3, CAV1, CCL2, TNF, GNAI1, TRIB3, G…	1879	534	13541	1.29555	1	0.147118	10.6684
Annotation Cluster 13	Enrichment Score: 3.757071615002289
Category	Term	Count	%	PValue	Genes	List Total	Pop Hits	Pop Total	Fold Enrichment	Bonferroni	Benjamini	FDR
GOTERM_CC_FAT	GO:0005578~proteinaceous extracellular matrix	64	2.46628	7.80254e-06	LTBP1, GPLD1, CASK, TGFB1, MMRN2, WNT2, OGN, GPC3, HMCN1, SLC1A3, HPSE, ANG, CCBE1, TGFBI, PHOSPHO1, COL12A1, LOX, FGF1, GPC1, GFOD2, CYR61, WNT10B, LAD1, MMP13, SLIT2, SLIT3, ADAMTS9, COL1A2, ADAMTS1, EFNA5, RELN, VCAN, COL1A1, MFAP4, ADAMTS3, ALPL, WNT16, ADAMTSL1, SPOCK2, DAG1, TIMP4, TIMP2, TIMP1, SMOC2, LGALS3BP, COMP, SMOC1, COL6A1, FBN2, LAMB1, ENTPD2, THBS4, HAPLN1, TNXB, CCDC80, NTN4, PA…	1611	260	11399	1.74172	0.00687374	0.000626846	0.0121333
GOTERM_CC_FAT	GO:0031012~extracellular matrix	73	2.8131	0.00066304	LTBP1, GPLD1, CASK, TGFB1, MMRN2, CFP, WNT2, OGN, GPC3, HMCN1, SLC1A3, HPSE, ANG, CCBE1, TGFBI, COL12A1, PHOSPHO1, LOX, FGF1, GPC1, GFOD2, CYR61, WNT10B, LAD1, MMP13, SLIT2, SLIT3, ADAMTS9, F3, COL1A2, ADAMTS1, EFNA5, RELN, VCAN, COL1A1, ADAMTS3, MFAP4, IBSP, ALPL, WNT16, ADAMTSL1, SPOCK2, DAG1, TIMP4, TIMP2, TIMP1, SMOC2, RPL30, LGALS3BP, COMP, SMOC1, COL6A1, FBN2, THBS1, LAMB1, ENTPD2, THBS4, H…	1611	353	11399	1.46325	0.44363	0.0251701	1.02616
GOTERM_CC_FAT	GO:0044420~extracellular matrix component	26	1.00193	0.00103516	LTBP1, DAG1, CASK, MMRN2, TIMP1, SMOC2, SLC1A3, HMCN1, ANG, FBN2, LAMB1, ENTPD2, THBS4, LAD1, CCDC80, NTN4, ANXA2, LAMA2, ITGA6, FBLN5, FREM1, COL1A2, EFNA5, ADAMTS1, COL1A1, MFAP4	1611	94	11399	1.95712	0.599707	0.0359599	1.59775
Annotation Cluster 14	Enrichment Score: 3.6869871051301533
Category	Term	Count	%	PValue	Genes	List Total	Pop Hits	Pop Total	Fold Enrichment	Bonferroni	Benjamini	FDR
GOTERM_MF_FAT	GO:0016298~lipase activity	27	1.04046	6.6826e-05	PLD3, LPL, PLD1, PLA2G15, LIPA, ABHD6, GPLD1, ABHD2, PNPLA2, ABHD1, PNPLA3, PNPLA6, GDPD1, PLCL2, PLCE1, PLCB4, NAPEPLD, SMPDL3A, PLCH2, PLA2G12B, PLCH1, PLA2G7, PLCD4, MGLL, LIPH, PLCD1, PLA2G4B	1728	89	12920	2.26826	0.117417	0.00777598	0.113925
GOTERM_MF_FAT	GO:0008081~phosphoric diester hydrolase activity	22	0.847784	0.00017337	PLD3, ENPP6, PLD1, GDE1, GPLD1, GPCPD1, GDPD1, GDPD2, PLCL2, PDE6C, PLCE1, PLCB4, NAPEPLD, PDE1B, SMPDL3A, PDE7A, PLCH2, PLCH1, PLCD4, PDE9A, PLCD1, PDE8A	1728	69	12920	2.38392	0.27679	0.0153128	0.295308
GOTERM_MF_FAT	GO:0004620~phospholipase activity	21	0.809249	0.000750102	PLD3, LPL, PLD1, PLA2G15, ABHD6, GPLD1, GDPD1, PNPLA6, PLCL2, PLCE1, PLCB4, NAPEPLD, SMPDL3A, PLCH2, PLA2G12B, PLCH1, PLA2G7, LIPH, PLCD4, PLCD1, PLA2G4B	1728	71	12920	2.21146	0.754011	0.045673	1.27179
Annotation Cluster 15	Enrichment Score: 3.636942319725157
Category	Term	Count	%	PValue	Genes	List Total	Pop Hits	Pop Total	Fold Enrichment	Bonferroni	Benjamini	FDR
GOTERM_MF_FAT	GO:0098772~molecular function regulator	181	6.97495	1.53027e-06	ALS2, CAST, GRPEL2, ATP1B3, RP2, RASGEF1B, RASGEF1A, ITSN1, TGFB1, TBC1D16, WNT2, ATP2B4, TIAM1, RAPGEF6, RAPGEF5, SPRED1, DNAJC3, PKIG, SOCS6, SIPA1L2, STIM2, CST3, SIPA1L3, SERPING1, RIC8B, PKIA, FARP1, TBC1D22A, FRY, THY1, RALGAPA2, RENBP, RALGAPA1, PLCE1, GAPVD1, CST6, FNBP1L, ARRB1, SIPA1L1, ACAP1, TNFAIP8, TFPI, CSTB, PYGO2, LOC525947, SPATA13, EPS8L2, EPS8L1, CAV1, CCL3, STX7, ARHGEF26, AG…	1728	972	12920	1.39229	0.00285599	0.000714764	0.00261018
GOTERM_MF_FAT	GO:0030695~GTPase regulator activity	49	1.88825	2.23521e-05	RP2, PREX2, TBC1D16, SMAP2, AGAP3, ARHGAP9, SIPA1L2, SIPA1L3, RIC8B, TBC1D22A, SLIT2, THY1, RALGAPA2, ARHGAP31, ARHGAP32, RALGAPA1, GAPVD1, ARRB1, SIPA1L1, ACAP1, ITGB1BP1, GNB5, AGFG2, ASAP3, SESN2, LLGL1, DOCK1, GMIP, RASGRP3, TBC1D4, TBC1D30, RASA3, CDC42EP3, ELMOD2, RASA2, TBC1D2, TBC1D2B, TBC1D10C, NCKAP1L, RGS16, DOCK4, TBC1D24, RGS20, RGS1, TSC1, RGS3, RGS5, CHN1, RGS7	1728	198	12920	1.85033	0.0409159	0.00347532	0.0381195
GOTERM_MF_FAT	GO:0060589~nucleoside-triphosphatase regulator activity	51	1.96532	4.92262e-05	GRPEL2, ATP1B3, RP2, PREX2, TBC1D16, SMAP2, AGAP3, ARHGAP9, SIPA1L2, SIPA1L3, RIC8B, SLIT2, TBC1D22A, THY1, ARHGAP31, RALGAPA2, RALGAPA1, ARHGAP32, GAPVD1, ARRB1, ITGB1BP1, SIPA1L1, ACAP1, GNB5, AGFG2, ASAP3, SESN2, LLGL1, DOCK1, RASGRP3, GMIP, TBC1D4, RASA3, TBC1D30, CDC42EP3, ELMOD2, RASA2, TBC1D2, TBC1D2B, TBC1D10C, NCKAP1L, RGS16, DOCK4, TBC1D24, RGS20, RGS1, TSC1, RGS3, RGS5, CHN1, RGS7	1728	215	12920	1.77358	0.0879004	0.00655031	0.0839329
GOTERM_MF_FAT	GO:0005096~GTPase activator activity	45	1.7341	5.95459e-05	AGFG2, RP2, PREX2, ASAP3, LLGL1, TBC1D16, SMAP2, DOCK1, RASGRP3, GMIP, TBC1D4, RASA3, TBC1D30, CDC42EP3, AGAP3, ELMOD2, TBC1D2, ARHGAP9, RASA2, TBC1D2B, TBC1D10C, SIPA1L2, SIPA1L3, NCKAP1L, RGS16, RIC8B, TBC1D22A, DOCK4, THY1, ARHGAP31, RALGAPA2, TBC1D24, RALGAPA1, RGS20, ARHGAP32, GAPVD1, RGS1, ARRB1, RGS3, ACAP1, SIPA1L1, RGS5, CHN1, GNB5, RGS7	1728	183	12920	1.83857	0.105325	0.00739219	0.10152
GOTERM_MF_FAT	GO:0008047~enzyme activator activity	65	2.50482	0.000371345	ALS2, GM2A, ATP1B3, RP2, PREX2, ITSN1, TGFB1, TBC1D16, SMAP2, AGAP3, ARHGAP9, SIPA1L2, SIPA1L3, PRKCE, RIC8B, TBC1D22A, THY1, RALGAPA2, ARHGAP31, ARHGAP32, RALGAPA1, GAPVD1, ARRB1, ACAP1, SIPA1L1, GNB5, CTSC, CAV1, CCL3, AGFG2, CCL8, ASAP3, GPRC5B, LLGL1, SLX4, DOCK1, RASGRP3, GMIP, ALOX5AP, TBC1D4, NKX3-1, TBC1D30, RASA3, BCAS3, CDC42EP3, ELMOD2, RASA2, TBC1D2, CFLAR, TBC1D2B, TBC1D10C, NCKAP1L,…	1728	316	12920	1.53796	0.500512	0.0263457	0.631525
GOTERM_MF_FAT	GO:0030234~enzyme regulator activity	122	4.70135	0.00291868	ALS2, CAST, GRPEL2, ATP1B3, RP2, ITSN1, TGFB1, TBC1D16, ATP2B4, SPRED1, DNAJC3, PKIG, SIPA1L2, CST3, SOCS6, SIPA1L3, SERPING1, RIC8B, PKIA, TBC1D22A, FRY, THY1, RALGAPA2, RENBP, RALGAPA1, GAPVD1, CST6, ARRB1, SIPA1L1, ACAP1, TNFAIP8, CSTB, TFPI, PYGO2, LOC525947, CCL3, CAV1, AGFG2, CCL8, TIMP4, ASAP3, TIMP2, SESN2, LLGL1, TIMP1, SLX4, PPP1R16B, DOCK1, GMIP, HEXIM2, NKX3-1, PPP2R2B, TBC1D30, SERPI…	1728	714	12920	1.27756	0.995759	0.121967	4.86348
GOTERM_BP_FAT	GO:0043547~positive regulation of GTPase activity	42	1.6185	0.00712931	CCL3, CCL2, RASGEF1B, CCL8, CCL4, LLGL1, TBC1D16, SMAP2, TIAM1, RASGRP1, TBC1D4, BCAS3, RASA3, TBC1D30, ELMOD2, ARHGEF10L, RHOG, TBC1D2, SERGEF, TBC1D2B, TBC1D10C, ARHGEF16, S100A10, GRHL3, RGS16, EPHA1, TBC1D22A, THY1, RALGAPA2, TBC1D24, RALGAPA1, RGS20, GAPVD1, ITGA6, TSC1, ARRB1, ACAP1, RGS5, CHN1, RGS7, RANGRF, BCAR3	1879	202	13541	1.49838	1	0.166838	13.3446
GOTERM_BP_FAT	GO:0043087~regulation of GTPase activity	49	1.88825	0.010359	CCL3, CCL2, IQGAP3, RASGEF1B, CCL8, ARHGAP35, CCL4, LLGL1, TBC1D16, SMAP2, GMIP, TIAM1, RASGRP1, TBC1D4, BCL6, TBC1D30, RASA3, BCAS3, ELMOD2, ARHGEF10L, RHOG, TBC1D2, SERGEF, TBC1D2B, TBC1D10C, ARHGEF16, S100A10, GRHL3, RGS16, EPHA1, TBC1D22A, THY1, RALGAPA2, TBC1D24, RALGAPA1, RGS20, GAPVD1, ITGA6, TSC1, ARRB1, ITGB1BP1, ACAP1, RGS5, CHN1, AMOT, RGS7, RANGRF, EFNA5, BCAR3	1879	249	13541	1.41815	1	0.211424	18.8161
Annotation Cluster 16	Enrichment Score: 3.577069337395663
Category	Term	Count	%	PValue	Genes	List Total	Pop Hits	Pop Total	Fold Enrichment	Bonferroni	Benjamini	FDR
GOTERM_BP_FAT	GO:0043085~positive regulation of catalytic activity	149	5.74181	1.01839e-05	CASR, ATP1B3, ZAK, RASGEF1B, IQGAP3, LPAR3, TLR6, TGFB1, CRADD, MAGED1, TBC1D16, AGTR1, BAK1, AGTR2, ATP2B4, TIAM1, ROBO1, GAB1, RALB, PDGFD, INSR, ADAM9, TNIK, FGF23, GRHL3, GRHL2, TBC1D22A, THY1, TNNT2, RALGAPA2, RALGAPA1, PLCE1, GAPVD1, RFK, ARRB1, F3, ACAP1, RIPK3, PDGFRA, CAMK1, RELN, EIF2AK2, EMP2, ABCA7, CAV1, CCL3, CCL2, FGR, CCL8, CCL4, LLGL1, EPM2AIP1, VDR, ACE, PTK2, TEK, NKX3-1, SCARB…	1879	766	13541	1.40179	0.0800134	0.00170052	0.0203848
GOTERM_BP_FAT	GO:0051336~regulation of hydrolase activity	129	4.9711	0.000157	CAST, CASR, ATP1B3, IQGAP3, RASGEF1B, WDR81, CRADD, TBC1D16, BAK1, AGTR1, AGTR2, CD44, TIAM1, ROBO1, SPRED1, PPP1R36, CST3, SERPING1, GRHL3, TBC1D22A, PLAUR, THY1, TNNT2, RALGAPA2, RENBP, RALGAPA1, GAPVD1, ARRB1, F3, ACAP1, TNFAIP8, RIPK3, CSTB, PDGFRA, EFNA5, ABCA7, CCL3, CAV1, CCL2, CCL8, TIMP4, TIMP2, CCL4, LLGL1, TIMP1, GMIP, NKX3-1, TBC1D30, SERPINA3-1, ARL6IP5, ARHGEF10L, HIP1, GNAT1, TBC1D…	1879	682	13541	1.3631	0.723563	0.0145048	0.313823
[truncated: 371 more rows]

## Sheet: F - primers
Table S1-F: List of primers
[truncated: 39 more rows]
